# Supplementary material for: Functional Copy Number Alterations as Diagnostic and Prognostic Biomarkers in Neuroendocrine Tumors
Source: Preprints.org preprint supplement (doi:10.20944/preprints202406.1211.v1), 2024-06-18
Supplement: Supplementary file 1 [file supplementary]

Archive with 2 entries (2 files):
- Supp_Materials/NET_Biomarker_Manuscript_Supp_Tables.xlsx
- Supp_Materials/NET_manuscript_supp_fig.pdf
