# Supplementary material for: Functional Copy Number Alterations as Diagnostic and Prognostic Biomarkers in Neuroendocrine Tumors
Source: Preprints.org preprint supplement (doi:10.20944/preprints202406.1211.v1), 2024-06-18
Supplement: Supplementary file 1 [file supplementary › Supp_Materials/NET_Biomarker_Manuscript_Supp_Tables.xlsx]

## Sheet: Supp Table 1
Supplementary table S1: iGC results for pNETs.
Copy number gain gene results for pNETs															Copy number loss gene results for pNETs
	Locus Information				Students t-test with unequal variance		Copy number status (%)			Gene Expression (Log2Fold change)					Gene	Locus Information			Students t-test with unequal variance		Copy number status (%)			Gene Expression (Log2Fold change)
Gene Name	Chr	Start	End	strand	p_value	fdr	Copy number gain	Copy number normal	Copy number loss	Expression in gain samples	Expression in normal samples	Expression in loss samples	Difference (gain vs normal)		Gene Name	Chr	Start	End	strand	p_value	fdr	Copy number gain	Copy number normal	Copy number loss	Expression in gain samples	Expression in normal samples	Expression in loss samples	Difference (normal - loss)
MOK	14	102695157	102771537	-	2.04e-06	0.00763294	0.612903	0.387097	0	3.83417	1.44488	NA	2.3893		ISX	22	35066158	35087387	+	0.314371	0.738214	0	0.83871	0.16129	NA	1.73505	0.897112	-0.837936
C9orf114	9	131586025	131592100	-	2.05e-06	0.00763294	0.580645	0.387097	0.0322581	1.72574	0.798929	0.138538	0.977611		NCAM1	11	112961420	113278436	+	0.434637	0.79787	0	0.83871	0.16129	NA	3.66239	2.68457	-0.977818
FAM218A	4	165878099	165880273	+	6.04e-06	0.0144692	0.516129	0.483871	0	3.65936	0.742446	NA	2.91691
ENDOG	9	131580778	131584955	+	1.08e-05	0.0144692	0.580645	0.387097	0.0322581	1.52451	0.202794	0.231642	1.31949
C9orf116	9	138387025	138391761	-	1.21e-05	0.0144692	0.612903	0.354839	0.0322581	2.10132	0.061278	-0.875192	2.11808
SREBF1	17	17714662	17740325	-	1.45e-05	0.0144692	0.516129	0.419355	0.0645161	2.54865	0.896719	-0.47055	1.83424
ERMP1	9	5784571	5833081	-	1.56e-05	0.0144692	0.516129	0.451613	0.0322581	2.35773	0.758831	0.990021	1.58348
KIF24	9	34252377	34329198	-	1.59e-05	0.0144692	0.580645	0.387097	0.0322581	2.78651	0.735324	-0.500175	2.14623
SPEF1	20	3758150	3762102	-	1.89e-05	0.0144692	0.709677	0.258065	0.0322581	3.29641	0.486021	-1.4781	3.02862
RIC8B	12	107168333	107283094	+	1.94e-05	0.0144692	0.516129	0.483871	0	2.31358	0.925192	NA	1.38839
TRUB2	9	131071378	131084497	-	2.46e-05	0.0166875	0.580645	0.387097	0.0322581	1.82458	0.938013	0.516301	0.919003
GPR19	12	12813994	12849121	-	3.19e-05	0.0197371	0.516129	0.483871	0	4.60048	2.09613	NA	2.50434
EPX	17	56270084	56282535	+	3.44e-05	0.0197371	0.677419	0.322581	0	3.04065	0.133698	NA	2.90695
CABLES2	20	60963685	60982339	-	5.23e-05	0.027815	0.677419	0.322581	0	1.94782	0.581344	NA	1.36647
NTS	12	86268072	86276770	+	5.73e-05	0.027897	0.580645	0.419355	0	5.66832	1.56408	NA	4.10424
ADCK1	14	78266425	78400297	+	6.3e-05	0.027897	0.612903	0.387097	0	1.77909	0.313658	NA	1.46543
LRFN1	19	39797456	39805976	-	7.27e-05	0.027897	0.677419	0.322581	0	1.60312	-0.674678	NA	2.2778
AFG3L2	18	12328942	12377275	-	7.52e-05	0.027897	0.548387	0.387097	0.0645161	0.971935	0.315117	0.123699	0.684163
SMIM22	16	4838397	4846492	+	7.94e-05	0.027897	0.16129	0.83871	0	1.86646	0.243569	NA	1.62289
CARTPT	5	71014989	71016875	+	7.98e-05	0.027897	0.645161	0.354839	0	6.39861	0.634545	NA	5.76406
CCNA1	13	37005966	37017019	+	8.42e-05	0.027897	0.580645	0.322581	0.0967742	4.83182	0.926822	1.69627	3.72744
C5orf55	5	441642	443258	-	8.93e-05	0.027897	0.612903	0.354839	0.0322581	2.40451	0.488542	1.38319	1.84142
MRPS26	20	3026674	3028896	+	9.1e-05	0.027897	0.709677	0.258065	0.0322581	1.76398	0.837285	0.0186606	1.01766
CCNO	5	54526979	54528819	-	9.53e-05	0.027897	0.580645	0.419355	0	-0.490582	-3.54691	NA	3.05633
POLR2I	19	36604610	36606206	-	0.00010527	0.027897	0.677419	0.322581	0	3.08183	1.03374	NA	2.04809
LRRN1	3	3841114	3891518	+	0.000105379	0.027897	0.16129	0.806452	0.0322581	1.40951	-0.852333	-4.50528	2.40234
C9orf24	9	34379016	34381598	-	0.000110152	0.027897	0.580645	0.387097	0.0322581	4.08686	0.500014	2.65191	3.42132
ASB4	7	95115212	95169543	+	0.000110605	0.027897	0.645161	0.354839	0	4.1376	0.075502	NA	4.0621
PLEKHA8	7	30067976	30157961	+	0.000113063	0.027897	0.709677	0.290323	0	2.39881	0.909659	NA	1.48915
PTK6	20	62159765	62168723	+	0.00011953	0.027897	0.677419	0.322581	0	-2.62931	1.36859	NA	-3.99789
TRAF4	17	27071022	27077976	+	0.000124124	0.027897	0.709677	0.258065	0.0322581	1.27395	-0.425636	-0.163991	1.67051
AMPH	7	38423296	38671167	-	0.00012636	0.027897	0.645161	0.354839	0	4.86362	0.590477	NA	4.27315
SDK2	17	71330522	71640227	-	0.000128533	0.027897	0.677419	0.322581	0	5.60729	2.29844	NA	3.30885
C19orf68	19	48673948	48700877	+	0.000134549	0.027897	0.677419	0.322581	0	1.63545	0.253086	NA	1.38236
FBXO15	18	71740587	71814999	-	0.000136284	0.027897	0.516129	0.419355	0.0645161	2.57539	0.410336	0.444149	2.16054
POSTN	13	38136718	38172981	-	0.000136959	0.027897	0.580645	0.322581	0.0967742	7.04976	3.69667	2.28955	3.67781
CTSV	9	99791958	99801592	-	0.000142225	0.027897	0.548387	0.387097	0.0645161	2.66137	0.180248	0.382206	2.45227
VLDLR	9	2621773	2656103	+	0.000142255	0.027897	0.548387	0.419355	0.0322581	1.27231	-0.391195	-0.131321	1.64495
MRPL41	9	140446308	140447007	+	0.000147525	0.0281543	0.548387	0.419355	0.0322581	2.13541	1.18263	0.894632	0.973352
CADM4	19	44126521	44143991	-	0.000151124	0.0281543	0.677419	0.322581	0	1.64521	-0.0229781	NA	1.66819
ZER1	9	131492064	131534213	-	0.000161111	0.028752	0.580645	0.387097	0.0322581	1.96076	0.453266	0.876371	1.47494
TOM1L2	17	17746821	17875784	-	0.000162048	0.028752	0.516129	0.419355	0.0645161	2.09411	0.612163	-0.11673	1.57914
CAAP1	9	26840682	26892826	-	0.000182838	0.0310773	0.516129	0.419355	0.0645161	1.50627	0.233257	0.457246	1.24314
FHOD3	18	33877658	34360183	+	0.000187251	0.0310773	0.580645	0.354839	0.0645161	3.89236	1.22775	-0.298675	2.89945
MMAB	12	109991519	110011358	-	0.000192604	0.0310773	0.516129	0.483871	0	2.15131	0.254916	NA	1.8964
RAF1	3	12625099	12705700	-	0.000195225	0.0310773	0.16129	0.806452	0.0322581	0.36317	-0.23918	-1.1673	0.638047
CRNKL1	20	20015004	20033136	-	0.000196006	0.0310773	0.709677	0.258065	0.0322581	2.24694	1.12954	1.25357	1.10362
NTMT1	9	132371162	132398410	+	0.000207277	0.0316318	0.580645	0.387097	0.0322581	1.83563	0.275137	1.11369	1.49599
ATP1B2	17	7549944	7561089	+	0.000210079	0.0316318	0.483871	0.451613	0.0645161	3.90378	1.12178	2.75625	2.57769
MIEF2	17	18163847	18169095	+	0.000212237	0.0316318	0.516129	0.419355	0.0645161	1.47508	-0.438795	-0.190361	1.88075
PCDHGB3	5	140749830	140892546	+	0.000226545	0.0327065	0.580645	0.419355	0	3.05464	0.546026	NA	2.50861
UNC5C	4	96083654	96470361	-	0.000228226	0.0327065	0.580645	0.419355	0	3.91674	1.25733	NA	2.65941
MNT	17	2287353	2304258	-	0.000244792	0.0336159	0.483871	0.451613	0.0645161	2.28468	0.909641	-0.807251	1.58965
CAMKK1	17	3763608	3794037	-	0.000248898	0.0336159	0.483871	0.451613	0.0645161	1.86195	-0.174705	0.228075	1.9863
PHF19	9	123617928	123631189	-	0.000250211	0.0336159	0.645161	0.322581	0.0322581	3.02599	1.26035	0.779451	1.80936
ZBTB42	14	105267517	105271049	+	0.000254438	0.0336159	0.612903	0.387097	0	-1.31224	0.0401508	NA	-1.3524
RASD1	17	17397750	17399709	-	0.000257126	0.0336159	0.516129	0.419355	0.0645161	4.50398	1.06869	4.52884	2.97393
BAG1	9	33252468	33264759	-	0.00026566	0.0341327	0.548387	0.387097	0.0645161	1.42628	0.122824	-0.509755	1.39383
WNT9B	17	44928951	44957926	+	0.000272133	0.0343718	0.645161	0.354839	0	1.92706	-0.350843	NA	2.27791
KIF27	9	86451612	86536380	-	0.000283026	0.0351518	0.580645	0.387097	0.0322581	2.66561	0.821246	1.0247	1.82871
EIF3K	19	39109711	39127599	+	0.00028816	0.0352028	0.677419	0.322581	0	1.31024	0.188852	NA	1.12139
CDC25B	20	3767418	3786768	+	0.000315271	0.0378935	0.709677	0.258065	0.0322581	4.24843	1.72824	1.8329	2.50856
STYK1	12	10771537	10826891	-	0.000331182	0.0391741	0.548387	0.451613	0	4.07464	1.62287	NA	2.45176
GALT	9	34646585	34650595	+	0.000340005	0.0395894	0.580645	0.387097	0.0322581	2.12378	0.780771	0.509784	1.36386
GTF3C5	9	135906061	135933890	+	0.000356804	0.0396204	0.612903	0.354839	0.0322581	1.61242	0.559708	0.568771	1.05196
TDRD7	9	100174301	100258407	+	0.000361675	0.0396204	0.548387	0.387097	0.0645161	1.88899	0.752709	0.780033	1.13237
RELN	7	103112230	103629963	-	0.000361861	0.0396204	0.645161	0.354839	0	4.69159	0.823	NA	3.86859
CCER2	19	39399619	39402798	-	0.0003621	0.0396204	0.677419	0.322581	0	1.78987	0.0102196	NA	1.77965
DDRGK1	20	3170995	3185343	-	0.000370755	0.0396204	0.709677	0.258065	0.0322581	1.3081	0.270577	-0.663204	1.14128
USP43	17	9548853	9633004	+	0.000382456	0.0396204	0.516129	0.419355	0.0645161	0.660788	-0.801906	-3.21711	1.78472
PSMD8	19	38865189	38874464	+	0.00038274	0.0396204	0.677419	0.322581	0	1.97728	0.54548	NA	1.4318
SOX15	17	7491497	7493488	-	0.000382806	0.0396204	0.483871	0.451613	0.0645161	3.66127	0.836326	0.918085	2.81472
CNTD2	19	40728114	40732597	-	0.000392883	0.0401064	0.677419	0.322581	0	4.71343	1.79668	NA	2.91676
GLIPR1L2	12	75784849	75817820	+	0.000433187	0.0434756	0.580645	0.419355	0	2.44977	0.238121	NA	2.21165
RRAGA	9	19049371	19051023	+	0.000444249	0.0434756	0.580645	0.387097	0.0322581	2.28966	1.26267	0.17153	1.11092
TOR1B	9	132565421	132573568	+	0.000448802	0.0434756	0.580645	0.387097	0.0322581	1.66928	0.789907	0.576929	0.895754
ABCB1	7	87133178	87342639	-	0.000449225	0.0434756	0.612903	0.387097	0	5.24084	1.60487	NA	3.63597
TMEM143	19	48835612	48867494	-	0.000458072	0.0437635	0.677419	0.322581	0	1.57404	0.136771	NA	1.43727
ZNF83	19	53115616	53141644	-	0.000470351	0.0437664	0.677419	0.322581	0	-0.592457	1.14814	NA	-1.7406
FBXL20	17	37408896	37557909	-	0.000474414	0.0437664	0.677419	0.322581	0	1.09687	0.257253	NA	0.839614
ACADVL	17	7120443	7128586	+	0.000477002	0.0437664	0.483871	0.451613	0.0645161	0.942341	0.0964626	0.28355	0.822493
ZZEF1	17	3907738	4046253	-	0.000481595	0.0437664	0.483871	0.451613	0.0645161	1.45483	0.513624	0.679378	0.920488
LRRN3	7	110731061	110765510	+	0.000529396	0.0475308	0.645161	0.354839	0	3.98266	0.199051	NA	3.78361
VCP	9	35056064	35072739	-	0.000543897	0.0481939	0.580645	0.387097	0.0322581	1.94226	1.04831	0.265662	0.95415
NDUFAF5	20	13765671	13799067	+	0.000549715	0.0481939	0.709677	0.258065	0.0322581	2.46828	0.786135	1.38642	1.61545
TOR1A	9	132575220	132586441	-	0.000575798	0.0498936	0.580645	0.387097	0.0322581	2.08283	1.15078	0.696755	0.966969
VPS53	17	411907	618096	-	0.000601377	0.0507118	0.483871	0.451613	0.0645161	1.98082	1.09	0.222764	0.999226
EIF2AK1	7	6061877	6098860	-	0.000610721	0.0507118	0.645161	0.354839	0	1.80824	0.808651	NA	0.999584
ATG9B	7	150709296	150721586	-	0.000617056	0.0507118	0.645161	0.354839	0	4.88094	2.16396	NA	2.71698
SGK494	17	26934981	26941211	-	0.000619658	0.0507118	0.709677	0.258065	0.0322581	2.77766	0.384349	1.42132	2.27809
FAM73B	9	131798899	131834361	+	0.0006237	0.0507118	0.580645	0.387097	0.0322581	2.68044	1.32148	0.951247	1.38744
RPLP0	12	120634502	120639014	-	0.000626072	0.0507118	0.580645	0.419355	0	-0.894601	0.814444	NA	-1.70905
C17orf97	17	260117	264457	+	0.000633188	0.0507321	0.483871	0.451613	0.0645161	2.43222	0.883307	-0.365594	1.70503
NAT14	19	55996556	55998935	+	0.00064041	0.0507321	0.677419	0.322581	0	4.0809	1.29472	NA	2.78618
NDUFA8	9	124894744	124922098	-	0.000646746	0.0507321	0.645161	0.322581	0.0322581	1.98789	1.22469	0.742631	0.807023
PITPNM3	17	6354582	6459877	-	0.000669675	0.0516767	0.483871	0.451613	0.0645161	2.72734	0.61155	1.80493	1.96662
LRAT	4	155661992	155674271	+	0.000677248	0.0516767	0.516129	0.483871	0	3.84578	0.146648	NA	3.69913
TMEM5	12	64173582	64203338	+	0.000682606	0.0516767	0.580645	0.419355	0	2.18527	0.556429	NA	1.62885
ZNF468	19	53341784	53360902	-	0.000694162	0.0516767	0.677419	0.322581	0	-0.363539	2.74009	NA	-3.10363
GUCY1B3	4	156680124	156728794	+	0.000696569	0.0516767	0.516129	0.483871	0	2.79836	1.25684	NA	1.54151
QSOX2	9	139098178	139137687	+	0.000700395	0.0516767	0.580645	0.387097	0.0322581	1.90409	0.622224	0.186724	1.31537
DOLK	9	131707808	131710012	-	0.000716141	0.0519712	0.580645	0.387097	0.0322581	1.46181	0.778506	0.34993	0.71627
ASPDH	19	51014856	51017142	-	0.000718335	0.0519712	0.677419	0.322581	0	5.56848	2.37767	NA	3.19081
DDN	12	49388932	49393088	-	0.000727828	0.0520909	0.645161	0.354839	0	4.8691	1.1307	NA	3.7384
PRPF8	17	1553922	1588176	+	0.000735878	0.0520909	0.483871	0.451613	0.0645161	2.15258	1.18567	-0.637581	1.19482
TXNL1	18	54270052	54305920	-	0.00074096	0.0520909	0.516129	0.419355	0.0645161	1.07184	0.518759	-0.190004	0.647583
C12orf66	12	64580091	64616076	-	0.000752926	0.0521241	0.580645	0.419355	0	1.07742	0.280778	NA	0.796639
CTNND2	5	10971951	11589029	-	0.000755422	0.0521241	0.612903	0.387097	0	-0.0572835	-3.81651	NA	3.75923
INIP	9	115446227	115480429	-	0.000773796	0.0526815	0.580645	0.387097	0.0322581	2.04414	1.1124	0.485403	0.979975
PPP1R26	9	138371647	138380739	-	0.000777638	0.0526815	0.612903	0.354839	0.0322581	1.75058	0.56192	-0.112724	1.24488
SAMD15	14	77843761	77857587	+	0.000784906	0.0526948	0.612903	0.387097	0	4.30979	1.90513	NA	2.40466
REC8	14	24641233	24649463	+	0.000793445	0.0527924	0.612903	0.387097	0	5.13697	2.02274	NA	3.11423
JAGN1	3	9932270	9936033	+	0.00080982	0.0533481	0.16129	0.806452	0.0322581	0.845097	-0.484092	-4.30357	1.47609
CTDP1	18	77439800	77514510	+	0.000816114	0.0533481	0.483871	0.451613	0.0645161	1.23172	0.52777	0.447264	0.714009
TUSC1	9	25676386	25678856	-	0.000833496	0.0537221	0.516129	0.419355	0.0645161	1.64057	0.307101	-2.07772	1.65145
SPTAN1	9	131314836	131395944	+	0.00084306	0.0537221	0.580645	0.387097	0.0322581	2.25344	1.14436	0.456623	1.16198
KDM6B	17	7743234	7758118	+	0.000843464	0.0537221	0.516129	0.419355	0.0645161	1.56137	0.0722684	0.124796	1.4821
C9orf9	9	135754284	135765588	+	0.000857009	0.0540568	0.612903	0.354839	0.0322581	2.07111	0.64108	-0.614133	1.53463
ENHO	9	34521039	34523037	-	0.000863225	0.0540568	0.580645	0.387097	0.0322581	3.19456	0.723658	1.54376	2.40782
DUSP15	20	30435439	30458467	-	0.000896011	0.0556423	0.677419	0.322581	0	3.51309	0.444804	NA	3.06828
PITPNA	17	1421282	1466110	-	0.000908496	0.0559513	0.483871	0.451613	0.0645161	2.35354	1.18151	-1.89299	1.55634
DCAF12	9	34086380	34126771	-	0.000925672	0.0560572	0.580645	0.387097	0.0322581	1.99784	1.08385	0.603881	0.950915
DVL3	3	183873283	183891314	+	0.000930099	0.0560572	0.16129	0.774194	0.0645161	2.04006	0.847005	0.689155	1.2052
NIM1K	5	43192169	43280952	+	0.000934354	0.0560572	0.612903	0.387097	0	5.18643	1.47586	NA	3.71057
TMEM130	7	98444110	98467673	-	0.000940305	0.0560572	0.645161	0.354839	0	7.03541	2.12251	NA	4.9129
PIGP	21	38437663	38445103	-	0.000957209	0.0563858	0.16129	0.741935	0.0967742	1.81795	0.662454	0.42199	1.18325
COL28A1	7	7398243	7575460	-	0.000962287	0.0563858	0.645161	0.354839	0	3.11829	-0.756664	NA	3.87495
MAGI2	7	77646373	79082890	-	0.000987695	0.0563858	0.645161	0.354839	0	4.03211	1.21556	NA	2.81655
AHCYL2	7	128864854	129070052	+	0.000989251	0.0563858	0.645161	0.354839	0	1.44671	-0.257875	NA	1.70459
WDR66	12	122356462	122441833	+	0.000991427	0.0563858	0.580645	0.419355	0	2.37144	0.592144	NA	1.77929
RPAIN	17	5322960	5332985	+	0.00100142	0.0563858	0.483871	0.451613	0.0645161	2.26833	1.00201	0.162721	1.37123
PCLO	7	82383320	82792197	-	0.00100191	0.0563858	0.645161	0.354839	0	3.60988	1.53977	NA	2.0701
HPN	19	35531409	35557477	+	0.00100635	0.0563858	0.677419	0.322581	0	-3.81104	0.154341	NA	-3.96538
CRIPAK	4	1385339	1389782	+	0.00101528	0.0564615	0.612903	0.387097	0	2.3985	0.527047	NA	1.87145
NCBP1	9	100395704	100436030	+	0.00103215	0.0569748	0.548387	0.387097	0.0645161	1.8926	1.17217	0.743922	0.781613
CCDC96	4	7042575	7044728	-	0.00110993	0.059719	0.580645	0.419355	0	3.70278	1.47681	NA	2.22597
PCP4	21	41239346	41301322	+	0.00111652	0.059719	0.16129	0.741935	0.0967742	7.30481	4.71697	5.86743	2.4551
ERN1	17	62120389	62207502	-	0.0011204	0.059719	0.677419	0.322581	0	0.265432	-1.21902	NA	1.48445
DCLK1	13	36342788	36705514	-	0.00112193	0.059719	0.580645	0.322581	0.0967742	3.73981	1.41123	0.846195	2.45898
SPIN1	9	91003296	91093623	+	0.00115906	0.060183	0.580645	0.387097	0.0322581	2.61448	1.0875	1.15647	1.52168
NDEL1	17	8339169	8371495	+	0.00116292	0.060183	0.516129	0.419355	0.0645161	1.34576	0.150424	0.85275	1.10169
STX2	12	131274144	131323819	-	0.00116993	0.060183	0.580645	0.419355	0	2.90454	1.29688	NA	1.60766
NPR3	5	32710742	32791830	+	0.00116999	0.060183	0.612903	0.387097	0	3.02942	0.512263	NA	2.51716
SURF2	9	136223420	136228041	+	0.00117103	0.060183	0.612903	0.354839	0.0322581	1.7584	0.299549	0.135522	1.47252
GRIP1	12	66741210	67072925	-	0.00118336	0.0604	0.580645	0.419355	0	1.90246	-0.0404645	NA	1.94293
PHACTR3	20	58152563	58422766	+	0.00120538	0.0605129	0.677419	0.322581	0	4.82411	1.44326	NA	3.38084
LLGL2	17	73521782	73560804	+	0.00121238	0.0605129	0.677419	0.322581	0	1.605	0.420013	NA	1.18499
KLHDC10	7	129710348	129775560	+	0.00121959	0.0605129	0.645161	0.354839	0	2.0395	0.884851	NA	1.15465
GOLGA2	9	131018107	131038268	-	0.00122435	0.0605129	0.580645	0.387097	0.0322581	1.60709	0.519875	0.384935	1.0976
ANAPC2	9	140069235	140083057	-	0.00123137	0.0605129	0.580645	0.387097	0.0322581	1.31843	0.51065	-0.131102	0.857149
LRRC4B	19	51020148	51071302	-	0.0012439	0.0605129	0.677419	0.322581	0	6.88626	2.56124	NA	4.32501
ISL1	5	50678957	50690564	+	0.00125866	0.0605129	0.548387	0.451613	0	5.25143	0.844781	NA	4.40665
ZGLP1	19	10415478	10420233	-	0.00126869	0.0605129	0.645161	0.354839	0	3.66271	-0.171244	NA	3.83395
GPX3	5	150399972	150408554	+	0.00127213	0.0605129	0.580645	0.387097	0.0322581	4.64761	0.889053	1.99711	3.67333
GPR162	12	6930962	6936583	+	0.0012765	0.0605129	0.580645	0.419355	0	5.56755	2.69269	NA	2.87486
WDR34	9	131395939	131419129	-	0.00128673	0.0605129	0.580645	0.387097	0.0322581	2.11451	1.0007	0.58164	1.14605
ZNF500	16	4798391	4817219	-	0.00128842	0.0605129	0.16129	0.83871	0	3.0909	0.972602	NA	2.11829
ABHD17B	9	74477367	74526161	-	0.00129114	0.0605129	0.580645	0.387097	0.0322581	2.22318	0.759873	1.66973	1.39331
PCDHGA11	5	140800536	140803653	+	0.00132967	0.0617416	0.580645	0.419355	0	3.34271	0.510567	NA	2.83214
BRCA1	17	41196311	41276132	-	0.00133397	0.0617416	0.709677	0.290323	0	2.63091	0.723015	NA	1.9079
ATP1A3	19	42470733	42497619	-	0.00134221	0.0617416	0.677419	0.322581	0	7.7887	3.47148	NA	4.31721
SPTLC1	9	94793415	94877756	-	0.00140432	0.0637184	0.580645	0.387097	0.0322581	1.49016	0.478777	0.361426	1.02041
KCNJ8	12	21917888	21927755	-	0.00140809	0.0637184	0.516129	0.483871	0	0.332148	-1.35757	NA	1.68972
FXR2	17	7494547	7518215	-	0.00141083	0.0637184	0.483871	0.451613	0.0645161	2.26773	1.31402	0.522145	1.0527
SNPH	20	1246934	1289971	+	0.0014298	0.0641858	0.709677	0.258065	0.0322581	3.39091	0.702794	0.466257	2.71439
DHRS7B	17	21030240	21095285	+	0.00145572	0.0649584	0.516129	0.419355	0.0645161	0.832119	-0.104269	0.397826	0.869442
MALSU1	7	23338939	23349180	+	0.00147034	0.0652202	0.709677	0.290323	0	1.23084	0.344337	NA	0.886503
WNT10B	12	49359122	49365641	-	0.00149204	0.0657909	0.645161	0.354839	0	3.1537	0.248222	NA	2.90548
ANKFY1	17	4067111	4167142	-	0.00151661	0.0661237	0.483871	0.451613	0.0645161	2.10249	1.24362	0.597893	0.939583
UBE2QL1	5	6448735	6496834	+	0.00152104	0.0661237	0.612903	0.387097	0	6.29205	3.14143	NA	3.15062
C9orf72	9	27546543	27573491	-	0.00153264	0.0661237	0.548387	0.387097	0.0645161	1.72304	0.33501	0.160366	1.41298
OXTR	3	8792093	8811300	-	0.00154232	0.0661237	0.16129	0.806452	0.0322581	5.37081	2.15225	2.23981	3.21519
GOLGA1	9	127640572	127703386	-	0.00155105	0.0661237	0.612903	0.354839	0.0322581	1.53115	0.663857	0.384408	0.890577
MKRN2	3	12598512	12625212	+	0.00155282	0.0661237	0.16129	0.806452	0.0322581	0.835134	0.21674	-0.00570508	0.626949
PARL	3	183547172	183602696	-	0.00158999	0.0673216	0.16129	0.774194	0.0645161	1.04301	0.479397	-0.00535847	0.6009
ABLIM3	5	148521009	148640002	+	0.00160941	0.067377	0.580645	0.419355	0	4.23086	2.26408	NA	1.96678
SPATA4	4	177105724	177116822	-	0.00161738	0.067377	0.516129	0.483871	0	2.67507	0.749747	NA	1.92532
AK8	9	135600964	135754198	-	0.00161842	0.067377	0.612903	0.354839	0.0322581	3.13846	0.862003	-0.259063	2.36988
COQ6	14	74416636	74429815	+	0.00166585	0.0677127	0.612903	0.387097	0	2.52778	1.3795	NA	1.14828
C1GALT1	7	7222245	7288282	+	0.00166808	0.0677127	0.645161	0.354839	0	3.16923	1.30539	NA	1.86384
EDN3	20	57875481	57901047	+	0.00167077	0.0677127	0.677419	0.322581	0	2.67472	-2.61992	NA	5.29464
YTHDF1	20	61826780	61847538	-	0.00167176	0.0677127	0.677419	0.322581	0	2.06677	1.32445	NA	0.742315
DIRAS2	9	93372113	93405387	-	0.00167192	0.0677127	0.580645	0.387097	0.0322581	3.66975	1.08984	-0.84715	2.72891
C14orf105	14	57936017	57960581	-	0.0016921	0.0681597	0.612903	0.387097	0	0.715291	-2.67481	NA	3.3901
TMEM120A	7	75616154	75623992	-	0.00175397	0.0692435	0.645161	0.354839	0	-0.485684	0.999307	NA	-1.48499
CEACAM19	19	45174723	45187627	+	0.00175584	0.0692435	0.677419	0.322581	0	2.82757	1.16658	NA	1.66099
EMC3	3	10004363	10052932	-	0.00176466	0.0692435	0.16129	0.806452	0.0322581	1.68959	0.74778	-0.285448	0.981545
AIF1L	9	133971862	133998539	+	0.00177125	0.0692435	0.612903	0.354839	0.0322581	1.0552	-1.14254	-3.32846	2.3799
REXO4	9	136271181	136283216	-	0.00177303	0.0692435	0.612903	0.354839	0.0322581	1.33443	0.562619	-0.749162	0.881128
RGP1	9	35749276	35753264	+	0.00177775	0.0692435	0.580645	0.387097	0.0322581	1.54515	-0.450836	-2.56226	2.1584
PLK2	5	57749808	57755966	-	0.00178405	0.0692435	0.580645	0.419355	0	2.74418	0.0569783	NA	2.6872
UCK1	9	134399182	134406662	-	0.00179754	0.0694054	0.612903	0.354839	0.0322581	1.47508	0.514136	0.447155	0.966525
ZNF397	18	32820993	32827153	+	0.00181609	0.0694189	0.580645	0.354839	0.0645161	1.9017	0.957428	1.13533	0.916902
SMCO3	12	14957583	14967116	-	0.00181652	0.0694189	0.516129	0.483871	0	4.77434	2.08749	NA	2.68684
GBA2	9	35736858	35749233	-	0.0018314	0.0696307	0.580645	0.387097	0.0322581	2.03199	0.994955	-0.457816	1.14879
SLITRK6	13	86366921	86373483	-	0.00185847	0.0699696	0.580645	0.322581	0.0967742	4.43513	0.405917	3.27552	3.367
WDR4	21	44263189	44299693	-	0.0018611	0.0699696	0.16129	0.741935	0.0967742	1.46983	0.47954	-0.742087	1.13125
TMEM132E	17	32907767	32966337	+	0.00186848	0.0699696	0.709677	0.290323	0	4.52376	1.85696	NA	2.6668
PCDH1	5	141232675	141257975	-	0.00191819	0.07118	0.580645	0.419355	0	2.68163	1.24975	NA	1.43188
THSD7A	7	11410061	11871824	-	0.00193053	0.07118	0.645161	0.354839	0	4.12485	1.50188	NA	2.62297
LAMA5	20	60884115	60942368	-	0.00193998	0.07118	0.677419	0.322581	0	2.5828	0.504752	NA	2.07804
CST5	20	23856571	23860380	-	0.00194662	0.07118	0.709677	0.258065	0.0322581	0.52816	-1.91364	-1.89674	2.43992
GEMIN5	5	154266975	154317776	-	0.00195049	0.07118	0.580645	0.387097	0.0322581	1.80901	1.03605	0.438397	0.818937
HDAC11	3	13521664	13547918	+	0.00196838	0.0712025	0.16129	0.806452	0.0322581	0.600414	-0.578685	-4.2807	1.32148
MXD4	4	2249159	2263739	-	0.00198708	0.0712025	0.580645	0.419355	0	2.55611	0.976094	NA	1.58002
RANBP6	9	6011018	6015640	-	0.0019874	0.0712025	0.516129	0.451613	0.0322581	2.10662	1.02574	0.785957	1.09686
ZNF625	19	12255704	12267546	-	0.00201921	0.0717602	0.612903	0.387097	0	3.73589	1.91929	NA	1.8166
C14orf79	14	105452615	105461855	+	0.00203081	0.0717602	0.612903	0.387097	0	2.12044	0.747206	NA	1.37323
TMEM145	19	42817476	42829214	+	0.00203186	0.0717602	0.677419	0.322581	0	5.45707	2.41677	NA	3.0403
STAC3	12	57637235	57644976	-	0.00207456	0.0726161	0.580645	0.419355	0	3.26767	1.63087	NA	1.6368
DCHS2	4	155155526	155312449	-	0.00207558	0.0726161	0.516129	0.483871	0	5.3602	1.822	NA	3.5382
RPS3A	4	152020724	152025357	+	0.00208703	0.0726753	0.516129	0.483871	0	-0.837148	-0.0953352	NA	-0.741813
TSTD2	9	100362361	100395962	-	0.00210629	0.0728305	0.548387	0.387097	0.0645161	1.56485	0.596815	-0.352959	1.10372
ALDH2	12	112204690	112247789	+	0.00211661	0.0728305	0.483871	0.516129	0	1.52534	0.324972	NA	1.20037
CLTA	9	36190852	36212059	+	0.00212269	0.0728305	0.580645	0.387097	0.0322581	1.90841	0.322568	0.530673	1.56984
CELF5	19	3224700	3297074	+	0.00213116	0.0728305	0.612903	0.387097	0	2.97651	0.195543	NA	2.78096
IL10RB	21	34638664	34669539	+	0.00214035	0.0728305	0.16129	0.741935	0.0967742	1.1172	0.457252	0.396394	0.666971
MYL6	12	56552044	56555366	+	0.00220537	0.0746002	0.580645	0.419355	0	1.77112	0.489945	NA	1.28117
HEPACAM2	7	92817851	92848908	-	0.00221483	0.0746002	0.645161	0.354839	0	5.41962	0.192519	NA	5.2271
SV2C	5	75379238	75629781	+	0.00222239	0.0746002	0.645161	0.354839	0	1.90296	-0.0432374	NA	1.9462
MROH8	20	35729628	35807991	-	0.00223245	0.0746019	0.677419	0.322581	0	2.12292	0.616909	NA	1.50601
CNFN	19	42891170	42894444	-	0.00224789	0.0747825	0.677419	0.322581	0	4.04225	1.01046	NA	3.0318
C7orf26	7	6629651	6648357	+	0.00228485	0.0756741	0.645161	0.354839	0	1.43305	0.638008	NA	0.795043
CAPS2	12	75670990	75784702	-	0.00229568	0.0756964	0.580645	0.419355	0	3.06641	0.996566	NA	2.06984
TMEM100	17	53796987	53800225	-	0.00232687	0.0763869	0.645161	0.354839	0	3.35998	1.11009	NA	2.2499
TMEM91	19	41869870	41889988	+	0.00235413	0.0769429	0.677419	0.322581	0	1.08582	-0.0436367	NA	1.12945
PCDHA8	5	140220906	140391929	+	0.0024544	0.0798698	0.580645	0.419355	0	3.43361	0.497405	NA	2.93621
MCC	5	112357795	112630612	-	0.00247049	0.0800439	0.612903	0.387097	0	3.09713	1.22168	NA	1.87545
GLRB	4	157997276	158093242	+	0.00248721	0.0801668	0.516129	0.483871	0	1.53309	-0.897238	NA	2.43032
ORAI1	12	122064454	122079946	+	0.0024958	0.0801668	0.580645	0.419355	0	-0.117752	1.17812	NA	-1.29587
TRIM50	7	72726531	72739579	-	0.00253871	0.0809085	0.612903	0.387097	0	-6.60137	-3.55932	NA	-3.04204
HABP4	9	99212436	99253618	+	0.0025406	0.0809085	0.548387	0.387097	0.0645161	3.36546	1.53069	2.16269	1.74449
CDH4	20	59827481	60515673	+	0.00259659	0.082092	0.677419	0.322581	0	3.1167	0.356685	NA	2.76001
PHF23	17	7138346	7142249	-	0.0025998	0.082092	0.483871	0.451613	0.0645161	2.2863	1.50461	0.836934	0.865151
PLCB4	20	9049700	9461463	+	0.00262894	0.0825558	0.709677	0.258065	0.0322581	4.29719	1.69541	1.8603	2.58346
PXMP2	12	133264191	133281577	-	0.00264598	0.0825558	0.580645	0.419355	0	-1.37232	0.253182	NA	-1.6255
OSER1	20	42824578	42839546	-	0.00265695	0.0825558	0.677419	0.322581	0	1.47343	0.518856	NA	0.954574
NOG	17	54671059	54672951	+	0.0026588	0.0825558	0.677419	0.322581	0	2.92278	-0.31143	NA	3.23421
ICOSLG	21	45642873	45660887	-	0.0026923	0.0832489	0.16129	0.741935	0.0967742	3.04749	1.47331	0.338723	1.7051
TTLL6	17	46839592	46871686	-	0.00272803	0.0835522	0.709677	0.290323	0	4.09249	0.812033	NA	3.28046
SMAD9	13	37418967	37494409	-	0.00273124	0.0835522	0.580645	0.322581	0.0967742	5.17243	2.62821	1.61582	2.77785
KATNAL2	18	44526786	44628614	+	0.00273574	0.0835522	0.548387	0.387097	0.0645161	2.76139	1.32241	2.85501	1.22004
ZNF524	19	56111705	56114504	+	0.00275084	0.0836704	0.677419	0.322581	0	-0.759653	0.323138	NA	-1.08279
CHGB	20	5891973	5906007	+	0.00279366	0.0845005	0.709677	0.258065	0.0322581	7.2975	2.51159	-0.00762278	5.06583
BRAP	12	112079949	112123800	-	0.00281848	0.0845005	0.483871	0.516129	0	2.01257	1.17133	NA	0.841239
ZDHHC21	9	14611068	14693480	-	0.00282326	0.0845005	0.516129	0.451613	0.0322581	2.38433	1.17381	1.25822	1.2049
PCDHGB1	5	140729827	140892546	+	0.00282629	0.0845005	0.580645	0.419355	0	3.22639	0.55472	NA	2.67167
NDUFA9	12	4758263	4796720	+	0.00284288	0.0845005	0.548387	0.451613	0	1.99816	1.17327	NA	0.824881
PCDHGA7	5	140762305	140892546	+	0.00284617	0.0845005	0.580645	0.419355	0	3.87331	1.84411	NA	2.0292
ZC2HC1C	14	75536279	75546690	+	0.00287553	0.0846598	0.612903	0.387097	0	1.74464	0.355296	NA	1.38935
DLG4	17	7093208	7108487	-	0.00289449	0.0846598	0.483871	0.451613	0.0645161	5.00819	3.06947	2.80662	1.97157
GNAI1	7	79764139	79848725	+	0.00290619	0.0846598	0.645161	0.354839	0	3.95686	1.88627	NA	2.07059
PCDHGB7	5	140797213	140799996	+	0.00291121	0.0846598	0.580645	0.419355	0	2.89968	0.70899	NA	2.19069
SPATA7	14	88851987	88904804	+	0.00291436	0.0846598	0.612903	0.387097	0	2.30039	0.834225	NA	1.46617
FKBP15	9	115927799	115983641	-	0.00291969	0.0846598	0.580645	0.387097	0.0322581	1.17329	0.430757	0.0741472	0.769967
CDC26	9	116029287	116037869	-	0.00297617	0.085963	0.580645	0.387097	0.0322581	1.64462	0.723643	1.1442	0.888631
ZNF30	19	35417806	35436076	+	0.00299632	0.0861061	0.677419	0.322581	0	2.07925	0.993985	NA	1.08526
NR1D1	17	38249036	38256978	-	0.00300753	0.0861061	0.709677	0.290323	0	3.19898	1.54987	NA	1.64911
DSCAM	21	41384342	42219039	-	0.0030253	0.0861061	0.16129	0.741935	0.0967742	6.36657	3.74927	6.33591	2.31884
PRKCG	19	54385437	54410901	+	0.00302735	0.0861061	0.677419	0.322581	0	5.21276	1.87055	NA	3.34221
DDX31	9	135468383	135538713	-	0.00306752	0.0869169	0.612903	0.354839	0.0322581	1.60458	0.667479	-0.575487	1.04068
MYBBP1A	17	4442190	4458681	-	0.00308986	0.0872185	0.483871	0.451613	0.0645161	1.44753	0.530349	1.28944	0.822292
ATP6V1G1	9	117349993	117361152	+	0.00310737	0.0872953	0.548387	0.419355	0.0322581	2.30501	1.37778	1.09613	0.947346
LRRC43	12	122652265	122688018	+	0.00312673	0.0872953	0.580645	0.419355	0	3.07807	1.37125	NA	1.70682
NCS1	9	132934856	132999583	+	0.003128	0.0872953	0.580645	0.387097	0.0322581	2.8396	1.01291	-0.385368	1.93425
PCDHB9	5	140566700	140571111	+	0.00313944	0.0872953	0.580645	0.419355	0	4.16712	2.32346	NA	1.84366
MAGEF1	3	184428154	184429836	-	0.00315295	0.087345	0.16129	0.774194	0.0645161	2.13013	1.40289	1.3676	0.729948
NUP188	9	131709971	131769375	+	0.00317689	0.0876822	0.580645	0.387097	0.0322581	2.03483	1.08933	0.229741	1.01162
TATDN2	3	10290176	10322906	+	0.00324626	0.0892662	0.16129	0.806452	0.0322581	1.47811	0.745288	-0.76583	0.790938
ERP44	9	102741460	102861334	-	0.00326763	0.0894484	0.516129	0.419355	0.0645161	1.07347	0.453563	-0.151362	0.700559
ITGA2	5	52285155	52390609	+	0.00327689	0.0894484	0.580645	0.419355	0	4.22607	2.10226	NA	2.12381
NLRP1	17	5404718	5487832	-	0.00329668	0.0894582	0.483871	0.451613	0.0645161	6.18315	3.63967	1.56058	2.80337
YARS2	12	32899477	32908887	-	0.00331116	0.0894582	0.580645	0.419355	0	1.32295	0.713727	NA	0.609225
SEC16A	9	139334547	139377507	-	0.00331327	0.0894582	0.580645	0.387097	0.0322581	1.36984	0.35016	-0.295611	1.06936
CXCL11	4	76954834	76957350	-	0.00333626	0.0897538	0.612903	0.387097	0	-4.1789	-1.45166	NA	-2.72724
ABCB8	7	150725508	150744869	+	0.00335665	0.0899776	0.645161	0.354839	0	2.03532	1.02651	NA	1.0088
UPK3B	7	76139658	76145838	+	0.00338614	0.0904426	0.645161	0.354839	0	-0.551401	2.8852	NA	-3.4366
DPP7	9	140004991	140009195	-	0.00341636	0.0909239	0.580645	0.387097	0.0322581	1.98599	0.830461	1.25197	1.1231
NOVA2	19	46436991	46476657	-	0.0034436	0.0913227	0.677419	0.322581	0	5.4374	1.59865	NA	3.83875
ADCYAP1R1	7	31092075	31151093	+	0.003484	0.0920666	0.645161	0.354839	0	2.38102	-1.50966	NA	3.89068
TTC9B	19	40721964	40724306	-	0.00350642	0.0923315	0.677419	0.322581	0	3.96022	1.0787	NA	2.88153
TMEM59L	19	18723681	18731849	+	0.00352295	0.0924404	0.645161	0.354839	0	6.58223	1.73558	NA	4.84665
PRPSAP1	17	74306816	74350230	+	0.0035463	0.0925585	0.677419	0.322581	0	-0.172562	0.893361	NA	-1.06592
CCDC65	12	49297892	49315359	+	0.0035523	0.0925585	0.645161	0.354839	0	2.53788	0.656988	NA	1.8809
NAPSA	19	50861728	50869087	-	0.00359182	0.0932622	0.677419	0.322581	0	3.2299	1.35652	NA	1.87338
BCL2L14	12	12223877	12252629	+	0.00361048	0.0934211	0.516129	0.483871	0	-4.83164	-2.85645	NA	-1.97519
H1FX	3	129033613	129035120	-	0.00363619	0.0935207	0.16129	0.806452	0.0322581	2.51228	1.22653	0.978647	1.29528
ATP5A1	18	43664109	43678319	-	0.00363942	0.0935207	0.548387	0.387097	0.0645161	0.77153	0.375051	0.299896	0.407215
C20orf96	20	251503	271419	-	0.00368549	0.094379	0.677419	0.290323	0.0322581	2.26473	1.14145	0.821919	1.15523
CTAGE6	7	143452181	143454843	-	0.00373918	0.0952647	0.645161	0.354839	0	1.18215	0.285649	NA	0.896503
SOX5	12	23682437	24715524	-	0.00374565	0.0952647	0.516129	0.483871	0	4.12133	1.41187	NA	2.70946
ATPAF2	17	17921333	17942480	-	0.00380564	0.0953983	0.516129	0.419355	0.0645161	1.82867	1.09496	0.410848	0.824919
S100B	21	48018530	48025035	-	0.00380794	0.0953983	0.16129	0.741935	0.0967742	3.9706	1.04749	3.73957	2.61249
RPS5	19	58898635	58906171	+	0.00381345	0.0953983	0.645161	0.354839	0	-1.18489	-0.326877	NA	-0.858008
THAP8	19	36525886	36545664	-	0.00382046	0.0953983	0.677419	0.322581	0	2.34028	1.18824	NA	1.15204
EMC10	19	50979733	50986783	+	0.00383348	0.0953983	0.677419	0.322581	0	4.54771	1.09342	NA	3.45429
C17orf107	17	4802947	4806227	+	0.00384297	0.0953983	0.483871	0.451613	0.0645161	1.21465	-0.391746	0.578002	1.48518
RTN4RL1	17	1837970	1928639	-	0.00384462	0.0953983	0.483871	0.451613	0.0645161	4.39869	2.16032	3.00634	2.13262
PHLDB3	19	43979254	44008985	-	0.00385331	0.0953983	0.677419	0.322581	0	2.75502	0.74735	NA	2.00767
HUS1	7	48002884	48019222	-	0.00387918	0.0957207	0.645161	0.354839	0	1.79291	1.00447	NA	0.788436
NDUFB6	9	32553523	32573182	-	0.00390976	0.0961569	0.548387	0.387097	0.0645161	1.66959	0.510385	0.680175	1.13495
RALGAPA2	20	20370271	20693266	-	0.00392414	0.096193	0.709677	0.258065	0.0322581	1.21583	0.33192	-0.259702	0.949644
SMIM6	17	73642645	73644057	+	0.00397345	0.0970825	0.677419	0.322581	0	3.83425	-0.298074	NA	4.13232
DCLK2	4	150999425	151178609	+	0.00405659	0.0973436	0.516129	0.483871	0	2.44618	0.521139	NA	1.92504
GPR150	5	94955979	94957284	+	0.00406486	0.0973436	0.612903	0.387097	0	-0.200395	-1.77993	NA	1.57953
INPP5K	17	1397870	1420182	-	0.00407161	0.0973436	0.483871	0.451613	0.0645161	1.45773	0.746528	0.450297	0.748236
C19orf73	19	49621653	49622397	-	0.004086	0.0973436	0.677419	0.322581	0	1.10177	0.0127318	NA	1.08904
TMEM139	7	142981991	142985142	+	0.00408729	0.0973436	0.645161	0.354839	0	-2.90037	-0.26797	NA	-2.6324
TMEM38B	9	108456805	108538892	+	0.00409121	0.0973436	0.548387	0.419355	0.0322581	3.15006	1.36964	4.40031	1.56394
LDHB	12	21788275	21810728	-	0.00409625	0.0973436	0.516129	0.483871	0	-0.476754	-1.59503	NA	1.11828
ITGA1	5	52084135	52249485	+	0.00409773	0.0973436	0.548387	0.451613	0	4.47795	2.65597	NA	1.82199
PCDHGB4	5	140767451	140892546	+	0.00410899	0.0973436	0.580645	0.419355	0	3.74384	2.0765	NA	1.66734
CCDC11	18	47753562	47792865	-	0.00411477	0.0973436	0.516129	0.419355	0.0645161	2.79276	0.917986	2.3561	1.68302
TNFAIP1	17	26662547	26674035	+	0.00417273	0.0984025	0.677419	0.290323	0.0322581	-0.612676	0.812102	2.52731	-1.5963
OR2A1	7	144015217	144016150	+	0.00419833	0.0985912	0.645161	0.354839	0	1.62601	-0.0677613	NA	1.69378
MRPS25	3	15083757	15106844	-	0.0042072	0.0985912	0.16129	0.806452	0.0322581	2.17821	0.954461	0.00937011	1.2601
PHTF2	7	77428108	77553500	+	0.00427442	0.099596	0.645161	0.354839	0	3.32603	1.29524	NA	2.0308
KCNA5	12	5153084	5155954	+	0.00430278	0.099596	0.548387	0.451613	0	5.43597	1.39459	NA	4.04138
SULF2	20	46286149	46414808	-	0.00430769	0.099596	0.677419	0.322581	0	3.88227	1.35653	NA	2.52574
ASIC1	12	50451419	50477405	+	0.00430832	0.099596	0.645161	0.354839	0	4.99936	2.32132	NA	2.67804
RABEP1	17	5185557	5289660	+	0.00433782	0.099596	0.483871	0.451613	0.0645161	1.97538	1.04607	1.28353	0.899625
TMEM74B	20	1161204	1165117	-	0.00435367	0.099596	0.709677	0.258065	0.0322581	7.20882	3.26835	4.86706	3.76284
ZNF79	9	130186652	130207651	+	0.00435845	0.099596	0.548387	0.419355	0.0322581	2.28616	1.41803	1.67449	0.849808
TUBG1	17	40761357	40767256	+	0.0043617	0.099596	0.709677	0.290323	0	0.983313	0.0354419	NA	0.947872
LRRC4	7	127667123	127671002	-	0.00437242	0.099596	0.645161	0.354839	0	4.61389	1.31006	NA	3.30383
PRRC2B	9	134305476	134375578	+	0.00440561	0.099596	0.612903	0.354839	0.0322581	1.49678	0.323939	0.110257	1.19065
PRPF4	9	116037913	116055185	+	0.00440942	0.099596	0.580645	0.387097	0.0322581	1.3858	0.723636	-0.330944	0.743288
RC3H2	9	125611731	125667562	-	0.0044136	0.099596	0.645161	0.322581	0.0322581	2.33364	0.684604	0.875882	1.63165
ATP8A2	13	25946148	26599989	+	0.00442924	0.099596	0.580645	0.322581	0.0967742	4.16279	1.61841	1.16068	2.65001
NPC1L1	7	44552133	44580914	-	0.00445521	0.099596	0.645161	0.354839	0	4.88144	1.35243	NA	3.52901
PRMT2	21	48055506	48075009	-	0.00445897	0.099596	0.16129	0.741935	0.0967742	2.05474	0.803582	1.52191	1.16828
NACAD	7	45120035	45128493	-	0.00446391	0.099596	0.645161	0.354839	0	5.76079	1.96399	NA	3.7968
RTN1	14	60062693	60337557	-	0.00452529	0.100664	0.612903	0.387097	0	6.0821	2.81161	NA	3.27048
GSAP	7	76940067	77045717	-	0.00458105	0.101601	0.645161	0.354839	0	2.07743	0.789176	NA	1.28825
TTLL9	20	30458504	30530858	+	0.0046557	0.10283	0.677419	0.322581	0	2.53732	0.40232	NA	2.135
GLE1	9	131266970	131302156	+	0.00466405	0.10283	0.580645	0.387097	0.0322581	1.94585	1.36596	0.703748	0.630835
NAPB	20	23355155	23402156	-	0.0046841	0.102967	0.709677	0.258065	0.0322581	4.14599	1.24366	2.61851	2.74957
ST6GALNAC2	17	74561460	74582145	-	0.00478534	0.104883	0.677419	0.322581	0	-2.68746	-0.54581	NA	-2.14165
HID1	17	72946838	72968900	-	0.00480854	0.105083	0.677419	0.322581	0	0.237191	-0.664202	NA	0.901393
TPST1	7	65670258	65825438	+	0.00484892	0.105656	0.645161	0.354839	0	3.12115	0.847673	NA	2.27348
CCDC136	7	128431463	128462187	+	0.00488291	0.105792	0.645161	0.354839	0	4.13784	2.04036	NA	2.09748
CEP250	20	34043222	34099804	+	0.00488357	0.105792	0.677419	0.290323	0.0322581	2.53897	1.2601	2.49087	1.1558
CA10	17	49707673	50236132	-	0.00490956	0.10596	0.709677	0.290323	0	3.84054	1.11306	NA	2.72749
NXPH3	17	47653297	47661172	+	0.00492495	0.10596	0.709677	0.290323	0	4.43769	2.85323	NA	1.58446
GPR142	17	72363644	72368739	+	0.00494198	0.10596	0.677419	0.322581	0	5.62435	1.15383	NA	4.47051
TMEM178B	7	140774031	141180180	+	0.0049518	0.10596	0.645161	0.354839	0	4.4545	1.9186	NA	2.5359
TMEM8B	9	35829221	35847232	+	0.00498915	0.106226	0.580645	0.387097	0.0322581	2.26388	0.636392	0.803915	1.6146
SAT2	17	7529551	7531194	-	0.00505116	0.10724	0.483871	0.451613	0.0645161	1.08741	0.180327	-0.187364	0.953041
C9orf142	9	139886869	139888440	+	0.00510165	0.108004	0.580645	0.387097	0.0322581	1.96163	0.880546	-0.0992782	1.15646
ORAI2	7	102073976	102097268	+	0.00519741	0.10972	0.612903	0.387097	0	3.50836	0.0347508	NA	3.47361
TMEFF1	9	103235519	103339918	+	0.00525633	0.110073	0.548387	0.387097	0.0645161	2.83593	1.05574	2.02426	1.64183
NRSN2	20	327369	335512	+	0.00526257	0.110073	0.709677	0.258065	0.0322581	1.75997	0.104491	0.336081	1.62974
ABCA5	17	67240575	67311774	-	0.00529947	0.110073	0.677419	0.322581	0	1.70675	0.410958	NA	1.29579
SMARCD3	7	150936058	150945749	-	0.00531416	0.110073	0.645161	0.354839	0	2.89668	0.719734	NA	2.17694
COPRS	17	30178883	30186093	-	0.00531617	0.110073	0.709677	0.258065	0.0322581	1.94087	0.851666	0.33669	1.14642
GTF3C4	9	135545421	135570342	+	0.00532732	0.110073	0.612903	0.354839	0.0322581	2.07493	1.05672	0.124665	1.09589
ZNF442	19	12460184	12476475	-	0.00533231	0.110073	0.612903	0.387097	0	2.21147	1.16046	NA	1.05101
APBA1	9	72042448	72287275	-	0.00535691	0.110275	0.580645	0.387097	0.0322581	3.23816	1.5866	3.10795	1.53453
TMEM106A	17	41363845	41372061	+	0.00538413	0.11053	0.709677	0.290323	0	-0.61153	1.09688	NA	-1.70841
DHRS7	14	60610836	60632211	-	0.00539938	0.110539	0.612903	0.387097	0	1.1588	0.47808	NA	0.680723
SH3GL2	9	17578951	17797127	+	0.00542773	0.110558	0.580645	0.387097	0.0322581	4.83095	1.32194	5.98095	3.15063
PPFIA3	19	49622645	49654287	+	0.00543101	0.110558	0.677419	0.322581	0	2.99574	1.73795	NA	1.25779
MRPL51	12	6601315	6602471	-	0.00544479	0.110558	0.580645	0.419355	0	0.942385	0.0611586	NA	0.881226
CDH10	5	24487208	24593608	-	0.00546875	0.110742	0.612903	0.387097	0	5.78241	2.44592	NA	3.33649
CTAGE15	7	143268893	143271480	+	0.0055156	0.111375	0.645161	0.354839	0	1.31351	0.242294	NA	1.07122
PLCG1	20	39766160	39804357	+	0.0055299	0.111375	0.677419	0.322581	0	2.58798	0.976882	NA	1.61109
MED27	9	134735496	134955274	-	0.00557324	0.111469	0.612903	0.354839	0.0322581	2.68974	1.32032	1.78993	1.33028
GPR179	17	36481492	36499693	-	0.00557942	0.111469	0.709677	0.290323	0	4.23351	0.54032	NA	3.69319
PRPF40B	12	50017196	50038452	+	0.00562916	0.112095	0.645161	0.354839	0	2.07503	1.00255	NA	1.07248
DDIT3	12	57910370	57914300	-	0.0056455	0.112095	0.612903	0.387097	0	2.35145	0.901772	NA	1.44968
UBQLN1	9	86274877	86323168	-	0.00565589	0.112095	0.580645	0.387097	0.0322581	1.3731	0.718564	0.355318	0.682481
BRD3	9	136895426	136933141	-	0.00571893	0.112425	0.612903	0.354839	0.0322581	2.07449	1.00787	1.11339	1.05783
PLEKHG3	14	65171125	65211064	+	0.00571916	0.112425	0.612903	0.387097	0	0.97279	-0.161019	NA	1.13381
ZP3	7	76026840	76071388	+	0.00573563	0.112425	0.645161	0.354839	0	-0.13738	1.19023	NA	-1.32761
FAM210A	18	13663345	13726591	-	0.0057364	0.112425	0.548387	0.387097	0.0645161	1.83167	1.01632	1.3695	0.764898
FAM161B	14	74399694	74417117	-	0.0057889	0.112425	0.612903	0.387097	0	3.49584	1.90044	NA	1.5954
CTSO	4	156845269	156875048	-	0.00579706	0.112425	0.516129	0.483871	0	2.42381	1.24198	NA	1.18183
NELFB	9	140149751	140168000	+	0.00581759	0.112425	0.580645	0.387097	0.0322581	1.22486	0.695161	-0.0643405	0.588119
GRP	18	56887399	56898006	+	0.00582193	0.112425	0.516129	0.419355	0.0645161	2.91408	0.103951	-2.25722	3.12495
CMBL	5	10277706	10308168	-	0.00582392	0.112425	0.612903	0.387097	0	1.29883	0.199332	NA	1.09949
FXN	9	71650478	71715094	+	0.00583003	0.112425	0.580645	0.387097	0.0322581	0.986102	0.301034	0.514432	0.668652
C9orf89	9	95858449	95875565	+	0.00584689	0.112425	0.580645	0.387097	0.0322581	2.53722	1.42056	0.728698	1.16988
ZBTB5	9	37438098	37465407	-	0.00585358	0.112425	0.580645	0.387097	0.0322581	1.46362	0.783602	-0.324968	0.765292
SYCP2	20	58438611	58508718	-	0.00587943	0.112631	0.645161	0.354839	0	-1.27179	1.14835	NA	-2.42014
MARS	12	57881735	57910438	+	0.00592741	0.113259	0.612903	0.387097	0	1.04329	0.449168	NA	0.594125
TAMM41	3	11831915	11888393	-	0.00600482	0.113972	0.16129	0.806452	0.0322581	1.93342	0.676819	-0.126875	1.28751
B4GALT7	5	177027118	177037348	+	0.00603241	0.113972	0.612903	0.387097	0	1.25246	0.29493	NA	0.957532
ELAVL3	19	11562142	11591803	-	0.00604014	0.113972	0.645161	0.354839	0	4.89955	1.44831	NA	3.45124
ETS2	21	40177230	40196879	+	0.00605191	0.113972	0.16129	0.741935	0.0967742	2.52983	1.39781	0.210675	1.26899
GDAP1L1	20	42875738	42909557	+	0.00607029	0.113972	0.677419	0.322581	0	5.63164	2.3705	NA	3.26113
ABHD16B	20	62492565	62494341	+	0.00607225	0.113972	0.677419	0.322581	0	1.86593	0.659105	NA	1.20683
ROPN1L	5	10441973	10465138	+	0.00609616	0.113972	0.612903	0.387097	0	0.312038	-1.4619	NA	1.77393
ATG12	5	115163892	115177548	-	0.00610163	0.113972	0.612903	0.387097	0	-0.020442	0.966606	NA	-0.987048
MOAP1	14	93648540	93651249	-	0.00610234	0.113972	0.612903	0.387097	0	2.82104	1.30609	NA	1.51495
TMEM63C	14	77648101	77725838	+	0.00612359	0.114083	0.612903	0.387097	0	4.64542	0.979644	NA	3.66578
HPGD	4	175411327	175444044	-	0.00615631	0.114377	0.516129	0.483871	0	5.29632	2.83487	NA	2.46145
FAM173B	5	10225618	10250021	-	0.00617011	0.114377	0.612903	0.387097	0	1.74424	1.07717	NA	0.667069
LRRTM2	5	138205078	138211057	-	0.0062555	0.114888	0.612903	0.387097	0	2.63905	0.461902	NA	2.17715
UBE2S	19	55912649	55919325	-	0.00626116	0.114888	0.677419	0.322581	0	3.6536	2.40411	NA	1.24949
LIPE	19	42905658	42931578	-	0.00627084	0.114888	0.677419	0.322581	0	2.52642	0.879465	NA	1.64695
TTLL11	9	124584203	124855885	-	0.00627473	0.114888	0.645161	0.322581	0.0322581	0.3834	-0.304645	-1.24194	0.773254
SEMA3A	7	83587658	83824217	-	0.00630644	0.115049	0.645161	0.354839	0	3.60992	1.38974	NA	2.22018
ZNF860	3	32023265	32033228	+	0.00631443	0.115049	0.16129	0.806452	0.0322581	0.483283	1.2093	2.90878	-0.791384
GPR108	19	6729924	6737633	-	0.00633331	0.115112	0.645161	0.354839	0	-0.32972	0.781844	NA	-1.11156
EXD3	9	140201345	140317714	-	0.00636084	0.115331	0.580645	0.387097	0.0322581	1.07102	0.343567	-1.01525	0.831974
ZNF879	5	178450775	178461388	+	0.00643848	0.116275	0.612903	0.387097	0	0.932026	2.91011	NA	-1.97808
BICD2	9	95473644	95527083	-	0.00648307	0.116275	0.580645	0.387097	0.0322581	1.92432	1.01945	-0.327512	1.00848
PAPSS1	4	108534821	108641419	-	0.00648355	0.116275	0.580645	0.419355	0	-0.160702	0.917088	NA	-1.07779
PEX5	12	7341758	7371170	+	0.00648551	0.116275	0.548387	0.451613	0	1.84924	-0.313218	NA	2.16245
VRK3	19	50479723	50528805	-	0.00649115	0.116275	0.677419	0.322581	0	1.46455	0.702157	NA	0.762391
OR2A42	7	143929003	143929936	-	0.00650869	0.116275	0.645161	0.354839	0	1.28528	-0.178767	NA	1.46404
CABLES1	18	20714527	20840434	+	0.00652213	0.116275	0.580645	0.354839	0.0645161	1.45156	0.248848	-1.16024	1.4195
JSRP1	19	2252249	2256422	-	0.00658627	0.116737	0.612903	0.387097	0	3.63395	1.5896	NA	2.04436
NACC2	9	138898382	138987131	-	0.00659474	0.116737	0.612903	0.354839	0.0322581	0.881384	-0.34388	-2.00591	1.36377
EAF1	3	15469063	15484120	+	0.00660404	0.116737	0.16129	0.806452	0.0322581	2.21902	1.56586	1.63532	0.650495
RECQL5	17	73622924	73663269	-	0.00661073	0.116737	0.677419	0.322581	0	2.00233	0.877206	NA	1.12513
DNM1	9	130965633	131017527	+	0.00663059	0.116811	0.580645	0.387097	0.0322581	4.10558	2.0962	2.07001	2.01139
CXCL10	4	76942268	76944689	-	0.0066711	0.117248	0.612903	0.387097	0	0.963616	3.76274	NA	-2.79912
ODF2	9	131217433	131257119	+	0.0067102	0.117367	0.580645	0.387097	0.0322581	1.99003	1.4237	-0.194285	0.690793
TUBG2	17	40811265	40819024	+	0.00676378	0.117367	0.709677	0.290323	0	1.41237	0.126585	NA	1.28579
ABCF3	3	183903862	183911795	+	0.0067853	0.117367	0.16129	0.774194	0.0645161	1.29472	0.568276	0.563514	0.726815
CEP128	14	80962820	81405884	-	0.00680065	0.117367	0.612903	0.387097	0	2.54431	1.22859	NA	1.31572
RIPK3	14	24805226	24809242	-	0.00682468	0.117367	0.612903	0.387097	0	-0.225052	1.10735	NA	-1.33241
SMU1	9	33041849	33076714	-	0.00682953	0.117367	0.548387	0.387097	0.0645161	1.39257	0.522471	-0.0822695	0.956486
COA1	7	43648054	43769140	-	0.00685236	0.117367	0.645161	0.354839	0	1.25412	0.408625	NA	0.845496
RPS29	14	50043389	50053134	-	0.00685392	0.117367	0.612903	0.387097	0	-0.165471	0.599472	NA	-0.764942
DNAJC30	7	73095247	73097781	-	0.00686131	0.117367	0.645161	0.354839	0	1.77061	0.904873	NA	0.865732
PSMD3	17	38137020	38154213	-	0.00686616	0.117367	0.677419	0.322581	0	1.60252	0.871208	NA	0.731308
CXXC1	18	47808712	47814692	-	0.00687821	0.117367	0.516129	0.419355	0.0645161	0.863756	0.277381	-0.0957866	0.636131
GRTP1	13	113978478	114018463	-	0.00688673	0.117367	0.580645	0.322581	0.0967742	-1.7366	-0.0613817	-0.331786	-1.61282
UNC13A	19	17712136	17799008	-	0.00692219	0.117367	0.645161	0.354839	0	6.11374	3.04368	NA	3.07006
PWP1	12	108079508	108106939	+	0.00692307	0.117367	0.516129	0.483871	0	1.18324	0.331222	NA	0.852013
PDRG1	20	30532757	30539883	-	0.00693243	0.117367	0.677419	0.322581	0	2.23709	1.14392	NA	1.09317
C9orf163	9	139377946	139380519	+	0.00696318	0.117367	0.580645	0.387097	0.0322581	2.60933	0.738801	2.23643	1.75533
C7orf63	7	89874487	89940377	+	0.00696894	0.117367	0.645161	0.354839	0	2.37348	0.40139	NA	1.97209
PZP	12	9301435	9360966	-	0.00697715	0.117367	0.548387	0.451613	0	2.97455	1.48509	NA	1.48946
IFT74	9	26947036	27062931	+	0.0070277	0.117589	0.516129	0.419355	0.0645161	1.77226	0.83833	0.719021	0.949842
C1QBP	17	5336098	5342471	-	0.00703429	0.117589	0.483871	0.451613	0.0645161	1.41105	0.745402	0.345287	0.715667
NSG1	4	4387982	4420785	+	0.00705155	0.117589	0.580645	0.419355	0	5.10212	1.58486	NA	3.51726
LPCAT1	5	1461537	1524092	-	0.00705342	0.117589	0.612903	0.387097	0	3.55918	2.57094	NA	0.988239
OXSR1	3	38207025	38296979	+	0.00716404	0.118581	0.16129	0.806452	0.0322581	1.43344	0.770882	0.0911123	0.688707
PDCL	9	125580375	125590935	-	0.00718719	0.118581	0.645161	0.322581	0.0322581	1.91902	1.21803	0.978278	0.72278
RBM18	9	125001833	125027143	-	0.00719032	0.118581	0.645161	0.322581	0.0322581	1.99802	1.06166	1.38021	0.907394
AQP3	9	33441151	33447631	-	0.00719331	0.118581	0.548387	0.387097	0.0645161	3.3025	1.11452	-1.15327	2.51195
ACOT8	20	44470359	44486048	-	0.00720158	0.118581	0.677419	0.322581	0	1.28667	0.512146	NA	0.774529
ESD	13	47345390	47371367	-	0.00720843	0.118581	0.580645	0.322581	0.0967742	2.07033	1.34766	0.977532	0.808091
GSS	20	33516235	33543438	-	0.00724813	0.118971	0.709677	0.290323	0	2.41869	1.56035	NA	0.858342
IRX2	5	2746278	2751769	-	0.00730005	0.11956	0.612903	0.387097	0	6.14383	1.34556	NA	4.79826
SPHK1	17	74380689	74383941	+	0.00732284	0.119671	0.677419	0.322581	0	-1.3159	0.442587	NA	-1.75849
OLFM1	9	137967088	138013030	+	0.00734162	0.119715	0.612903	0.354839	0.0322581	2.5755	0.790484	-2.35098	2.0468
CAMSAP1	9	138700332	138799005	-	0.00739814	0.120373	0.612903	0.354839	0.0322581	1.90598	0.906443	-0.618052	1.12657
C9orf78	9	132589563	132597572	-	0.0074936	0.121661	0.580645	0.387097	0.0322581	1.69417	1.04432	0.332291	0.704624
PIAS2	18	44383186	44497495	-	0.00753352	0.121865	0.548387	0.387097	0.0645161	2.06052	0.993723	1.60091	0.980057
PVR	19	45147097	45162362	+	0.00754543	0.121865	0.677419	0.322581	0	3.03554	1.14736	NA	1.88818
ANK2	4	113739238	114304896	+	0.00756586	0.121865	0.580645	0.419355	0	4.98537	2.07075	NA	2.91462
TGDS	13	95226307	95248529	-	0.00759256	0.121865	0.580645	0.322581	0.0967742	1.84925	1.04327	0.907276	0.837364
CELF4	18	34823002	35146000	-	0.00760146	0.121865	0.580645	0.354839	0.0645161	3.68702	1.65778	3.45056	1.75342
NUP214	9	134000947	134110057	+	0.00760429	0.121865	0.612903	0.354839	0.0322581	1.40094	0.713281	0.0413914	0.743653
HEATR4	14	73945188	74025651	-	0.00762288	0.121901	0.612903	0.387097	0	2.96404	1.35086	NA	1.61318
PIANP	12	6802956	6809596	-	0.00770405	0.122245	0.580645	0.419355	0	3.54838	0.538053	NA	3.01033
STXBP1	9	130374485	130454995	+	0.00770405	0.122245	0.548387	0.419355	0.0322581	2.94577	1.11926	1.64911	1.78867
HCN2	19	589892	617159	+	0.00771252	0.122245	0.612903	0.387097	0	6.52533	3.98779	NA	2.53754
ATP13A1	19	19756006	19774503	-	0.00771541	0.122245	0.677419	0.322581	0	1.78009	0.828712	NA	0.951375
GNA14	9	80037994	80263232	-	0.00772644	0.122245	0.580645	0.387097	0.0322581	1.93623	0.614361	-1.85025	1.51146
PRUNE2	9	79226291	79307331	-	0.00780888	0.123288	0.580645	0.387097	0.0322581	3.8225	1.26828	4.57535	2.29983
CLUL1	18	596997	650298	+	0.00787584	0.12352	0.483871	0.451613	0.0645161	2.26319	0.172121	1.39101	1.93871
LHFPL4	3	9540044	9595486	-	0.00788769	0.12352	0.16129	0.806452	0.0322581	5.86035	3.98374	4.49306	1.85703
ATRN	20	3451664	3596691	+	0.00788989	0.12352	0.709677	0.258065	0.0322581	1.70728	0.827781	0.349926	0.932592
SURF6	9	136197542	136203047	-	0.00792517	0.12359	0.612903	0.354839	0.0322581	1.21159	0.633456	-0.462892	0.669497
EXOSC2	9	133569146	133580281	+	0.00792972	0.12359	0.612903	0.354839	0.0322581	1.10431	0.371028	-0.822106	0.832713
GPATCH1	19	33571785	33621318	+	0.0079441	0.12359	0.677419	0.322581	0	1.70197	0.851133	NA	0.850834
TRIM32	9	119449580	119463579	+	0.00801365	0.124196	0.516129	0.451613	0.0322581	1.66637	0.0964616	1.17559	1.49797
SPINK1	5	147204142	147218794	-	0.00801643	0.124196	0.580645	0.419355	0	-3.37012	-7.0607	NA	3.69057
TOB1	17	48939583	48943715	-	0.00805476	0.124531	0.709677	0.290323	0	-2.10386	-0.532706	NA	-1.57115
NOS3	7	150688143	150711687	+	0.00821766	0.126737	0.645161	0.354839	0	3.26144	1.13115	NA	2.13029
C9orf85	9	74526422	74588373	+	0.00824754	0.126737	0.580645	0.387097	0.0322581	1.53847	0.859328	1.78079	0.608259
TRAF1	9	123664670	123676850	-	0.00824847	0.126737	0.645161	0.322581	0.0322581	2.39868	1.10889	-0.0511813	1.39525
DAAM1	14	59655380	59838123	+	0.00826561	0.126739	0.612903	0.387097	0	2.09172	0.931754	NA	1.15997
NIPSNAP3A	9	107509848	107522405	+	0.00829245	0.12689	0.548387	0.387097	0.0645161	2.292	1.17262	1.75232	1.03657
SECISBP2	9	91933387	91974578	+	0.00834047	0.127363	0.580645	0.387097	0.0322581	0.995989	-0.147363	0.461583	1.09651
SSC5D	19	55999869	56015691	+	0.00844251	0.128658	0.677419	0.322581	0	3.61631	0.624497	NA	2.99182
MMP24	20	33814538	33864804	+	0.00848441	0.128794	0.709677	0.290323	0	2.39964	0.456726	NA	1.94292
CRY1	12	107385141	107487635	-	0.00848602	0.128794	0.516129	0.483871	0	2.42329	1.12738	NA	1.29591
AGPAT9	4	84457259	84527027	+	0.00851868	0.128936	0.580645	0.419355	0	3.86241	1.6712	NA	2.19121
ZNF618	9	116638561	116818875	+	0.00853927	0.128936	0.548387	0.419355	0.0322581	2.11422	0.443453	2.31513	1.53707
MAN1B1	9	139981378	140003639	+	0.00854727	0.128936	0.580645	0.387097	0.0322581	1.65378	0.583334	0.994328	1.03883
OGFOD3	17	80347085	80376513	-	0.00862042	0.12958	0.645161	0.354839	0	1.80741	0.89202	NA	0.915393
PNPLA8	7	108110865	108166762	-	0.00864159	0.12958	0.645161	0.354839	0	1.76947	0.767751	NA	1.00172
SIGMAR1	9	34634718	34637823	-	0.00864448	0.12958	0.580645	0.387097	0.0322581	1.31821	-0.509741	-0.269706	1.80949
HERPUD2	7	35672268	35734772	-	0.00865952	0.12958	0.645161	0.354839	0	0.922429	0.0816076	NA	0.840822
ZNF721	4	433772	492960	-	0.00869073	0.129786	0.612903	0.387097	0	0.138015	1.71171	NA	-1.5737
C14orf28	14	45366506	45376460	+	0.00872176	0.129989	0.612903	0.387097	0	1.21764	0.413294	NA	0.804342
TVP23C	17	15405577	15466945	-	0.00874051	0.129989	0.516129	0.419355	0.0645161	1.95363	0.881741	-2.8295	1.56672
XKR7	20	30555804	30586256	+	0.00875666	0.129989	0.709677	0.290323	0	6.50192	2.49914	NA	4.00278
ARHGEF37	5	148961134	149014527	+	0.0087943	0.130289	0.645161	0.354839	0	0.961284	-0.260591	NA	1.22188
VGF	7	100805789	100808852	-	0.00883039	0.130338	0.645161	0.354839	0	6.14381	2.38545	NA	3.75836
PHPT1	9	139743267	139745495	+	0.00883264	0.130338	0.580645	0.387097	0.0322581	0.800275	-0.430924	-0.639707	1.24726
TTC3	21	38445483	38575419	+	0.00885977	0.13048	0.16129	0.741935	0.0967742	1.84776	0.678799	0.871149	1.14677
MAP3K9	14	71189242	71250169	-	0.00890019	0.130817	0.612903	0.387097	0	2.38255	0.925432	NA	1.45711
PELO	5	52083773	52098451	+	0.00895109	0.131093	0.548387	0.451613	0	2.39093	1.38	NA	1.01093
L3MBTL4	18	5954704	6414910	-	0.00897298	0.131093	0.548387	0.387097	0.0645161	0.74264	-0.659647	-1.70147	1.55112
SUV420H2	19	55853582	55859488	+	0.00899069	0.131093	0.677419	0.322581	0	2.44741	1.32689	NA	1.12052
NKIRAS1	3	23933571	23958537	-	0.00901937	0.131093	0.16129	0.806452	0.0322581	2.24941	0.544804	2.21905	1.64021
DBP	19	49133816	49140807	-	0.00902232	0.131093	0.677419	0.322581	0	1.67187	0.376502	NA	1.29537
MACC1	7	20174277	20257013	-	0.00902652	0.131093	0.709677	0.290323	0	-1.5431	0.438858	NA	-1.98196
PDE1B	12	54943176	54973023	+	0.00904917	0.131093	0.580645	0.419355	0	3.73543	1.9382	NA	1.79723
PCDHA13	5	140261853	140391929	+	0.00906556	0.131093	0.580645	0.419355	0	2.3565	-0.0552656	NA	2.41177
OXSM	3	25831562	25836025	+	0.00909921	0.131093	0.16129	0.806452	0.0322581	1.29751	0.29105	0.181135	1.01069
DIP2A	21	47878861	47989926	+	0.00910762	0.131093	0.16129	0.741935	0.0967742	1.72586	0.682175	1.22271	0.981316
OXNAD1	3	16306666	16347594	+	0.00912671	0.131093	0.16129	0.806452	0.0322581	1.6831	1.01791	-0.386285	0.719191
SYNPO2	4	119771842	119982402	+	0.00914476	0.131093	0.580645	0.419355	0	2.92235	0.964652	NA	1.9577
ZNF596	8	182136	197340	+	0.00914767	0.131093	0.16129	0.774194	0.0645161	0.101734	1.67059	1.28109	-1.5389
ZNF383	19	37708827	37734826	+	0.00924015	0.131968	0.677419	0.322581	0	1.63585	-0.035567	NA	1.67141
TMEM106C	12	48357329	48362661	+	0.00924674	0.131968	0.645161	0.354839	0	1.47377	-0.148443	NA	1.62222
C19orf60	19	18699494	18703147	+	0.00926182	0.131968	0.645161	0.354839	0	1.50916	0.331898	NA	1.17726
BTBD17	17	72352554	72357958	-	0.00930451	0.132046	0.677419	0.322581	0	3.66498	0.129482	NA	3.5355
DUS4L	7	107204401	107218968	+	0.00931226	0.132046	0.645161	0.354839	0	2.08441	1.04938	NA	1.03503
ELL2	5	95220801	95297775	-	0.00932051	0.132046	0.612903	0.387097	0	1.74968	-0.0414818	NA	1.79117
TLE1	9	84198597	84304450	-	0.00934427	0.132132	0.580645	0.387097	0.0322581	1.04412	0.156965	0.0233769	0.89743
BLMH	17	28575212	28619184	-	0.00936365	0.132155	0.709677	0.258065	0.0322581	1.45242	0.748132	0.42237	0.740479
PROM1	4	15969848	16077741	-	0.00939783	0.132387	0.580645	0.419355	0	-4.77295	-1.34424	NA	-3.4287
SETD5	3	9439383	9519838	+	0.00948452	0.133356	0.16129	0.806452	0.0322581	1.50342	0.835048	0.539665	0.679735
PRR15	7	29603426	29606911	-	0.00964487	0.135112	0.709677	0.290323	0	0.9551	-1.01392	NA	1.96902
ZNF561	19	9718001	9731916	-	0.00964568	0.135112	0.612903	0.387097	0	1.73081	0.963411	NA	0.767398
LMTK3	19	48988527	49016446	-	0.00966752	0.135164	0.677419	0.322581	0	2.44725	0.0896089	NA	2.35764
MAPK7	17	19281033	19286857	+	0.00976694	0.135865	0.516129	0.419355	0.0645161	1.84833	0.962282	1.15116	0.860865
OLFM4	13	53602875	53626196	+	0.00977278	0.135865	0.548387	0.354839	0.0967742	-7.32311	-2.44132	-6.35833	-4.04243
PCDHGC5	5	140868807	140871444	+	0.00979062	0.135865	0.580645	0.419355	0	2.28258	0.476647	NA	1.80593
CABYR	18	21718919	21740033	+	0.00983665	0.136082	0.580645	0.354839	0.0645161	4.42739	2.71348	1.65265	1.87711
LMTK2	7	97736196	97838945	+	0.00984278	0.136082	0.645161	0.354839	0	1.32845	0.251245	NA	1.0772
C18orf21	18	33552587	33559250	+	0.00987368	0.136186	0.580645	0.354839	0.0645161	0.899571	0.309743	-0.742417	0.751699
CLIC6	21	36041461	36090525	+	0.00990083	0.136186	0.16129	0.741935	0.0967742	1.18951	-0.553135	-3.08321	2.03458
NEDD4L	18	55711609	56068772	+	0.00990507	0.136186	0.516129	0.419355	0.0645161	-0.910806	0.502797	-1.48503	-1.14856
PPAT	4	57259527	57301802	+	0.00992514	0.136205	0.612903	0.387097	0	0.194396	1.05423	NA	-0.859838
TMEM132C	12	128751947	129192460	+	0.00995578	0.136205	0.580645	0.419355	0	-0.67108	-2.97218	NA	2.3011
ETV1	7	13930853	14026139	-	0.00996131	0.136205	0.645161	0.354839	0	3.36392	1.57782	NA	1.7861
ATP5E	20	57603732	57607422	-	0.0099994	0.136475	0.677419	0.322581	0	2.36807	1.35125	NA	1.01682
EPS15L1	19	16466054	16582823	-	0.0100817	0.137191	0.645161	0.354839	0	1.55887	0.629195	NA	0.92968
KPTN	19	47978397	47987521	-	0.0100887	0.137191	0.677419	0.322581	0	2.05997	0.86956	NA	1.19041
PLD6	17	17104308	17109646	-	0.0101353	0.13736	0.516129	0.419355	0.0645161	1.1889	0.261769	1.3401	0.783355
NRXN3	14	78636715	80334633	+	0.0101656	0.13736	0.612903	0.387097	0	2.34991	0.240004	NA	2.10991
UNC5A	5	176237559	176307899	+	0.0101747	0.13736	0.612903	0.387097	0	3.23303	0.797393	NA	2.43564
MAMDC2	9	72658496	72791476	+	0.0101748	0.13736	0.580645	0.387097	0.0322581	1.50426	-0.62124	-0.747993	2.13525
MYO5B	18	47349155	47721451	-	0.0102098	0.137583	0.516129	0.419355	0.0645161	0.602242	-0.430033	-0.246948	1.00786
DEPDC4	12	100597446	100660857	-	0.0102697	0.13814	0.580645	0.419355	0	1.51987	1.25e-05	NA	1.51986
STK24	13	99102452	99229405	-	0.0103592	0.139093	0.580645	0.322581	0.0967742	1.47543	0.266118	0.253194	1.21229
FAM174A	5	99871008	99922445	+	0.0103841	0.139177	0.612903	0.387097	0	1.85537	0.682299	NA	1.17307
UBE2G1	17	4172511	4269969	-	0.0105229	0.140307	0.483871	0.451613	0.0645161	1.44251	0.861828	0.968758	0.567318
N4BP2L1	13	32974859	33002315	-	0.0105617	0.140307	0.580645	0.322581	0.0967742	0.117242	1.05491	1.15112	-0.959872
SND1	7	127292042	127732661	+	0.0105701	0.140307	0.645161	0.354839	0	-0.368069	0.177818	NA	-0.545888
SNCA	4	90645249	90758127	-	0.0105751	0.140307	0.580645	0.419355	0	4.33934	2.54614	NA	1.79319
ZNF121	19	9676403	9695209	-	0.0105849	0.140307	0.612903	0.387097	0	1.53609	0.686419	NA	0.849666
UBE2E2	3	23244783	23632296	+	0.010618	0.140307	0.16129	0.806452	0.0322581	2.99502	1.36988	-0.349898	1.69128
NARS	18	55267890	55289177	-	0.0106191	0.140307	0.516129	0.419355	0.0645161	1.40735	0.85858	0.785772	0.558481
RUNDC3A	17	42385926	42395238	+	0.0106483	0.140344	0.709677	0.290323	0	6.23094	2.91128	NA	3.31966
GPR98	5	89854616	90460033	+	0.0106657	0.140344	0.645161	0.354839	0	3.83872	1.3651	NA	2.47362
RECK	9	36036909	36086281	+	0.0107	0.140344	0.580645	0.387097	0.0322581	2.80221	1.30815	-0.552275	1.63717
WDR60	7	158649268	158738883	+	0.0107295	0.140344	0.645161	0.354839	0	2.27695	1.05066	NA	1.22629
DDX55	12	124086623	124105490	+	0.0107633	0.140344	0.580645	0.419355	0	1.09503	0.608372	NA	0.486663
SURF1	9	136218659	136223361	-	0.010786	0.140344	0.612903	0.354839	0.0322581	0.48631	-0.153607	0.000470617	0.627077
ACSF2	17	48503518	48552206	+	0.010786	0.140344	0.709677	0.290323	0	-0.113945	0.867423	NA	-0.981368
PCDHGA3	5	140723600	140892546	+	0.0107916	0.140344	0.580645	0.419355	0	1.88521	-0.0900525	NA	1.97526
IKBKAP	9	111629796	111696612	-	0.0108066	0.140344	0.580645	0.387097	0.0322581	2.14853	1.18782	1.1761	0.961609
TRMT10A	4	100467863	100484825	-	0.0108102	0.140344	0.580645	0.419355	0	1.40764	0.692389	NA	0.71525
HMCES	3	128997683	129024136	+	0.0108689	0.140664	0.16129	0.806452	0.0322581	2.20289	0.966342	0.199071	1.26606
TSPAN13	7	16793350	16824161	+	0.0109206	0.140664	0.645161	0.354839	0	1.20701	-0.828284	NA	2.03529
ABCA2	9	139901685	139922740	-	0.0109303	0.140664	0.580645	0.387097	0.0322581	2.96032	1.70148	0.683213	1.33717
RDH11	14	68143516	68162510	-	0.0109588	0.140664	0.612903	0.387097	0	2.98075	1.60619	NA	1.37455
ASNS	7	97481428	97501477	-	0.010973	0.140664	0.645161	0.354839	0	0.352071	-0.606732	NA	0.958803
EDIL3	5	83236413	83680685	-	0.0109988	0.140664	0.645161	0.354839	0	5.37934	2.38193	NA	2.99741
TUBGCP3	13	113139318	113242499	-	0.0110042	0.140664	0.580645	0.322581	0.0967742	1.76135	1.15177	0.405253	0.78186
SETBP1	18	42260137	42457379	+	0.0110195	0.140664	0.548387	0.387097	0.0645161	1.69131	0.542079	0.997335	1.0842
GCC1	7	127220681	127225654	-	0.0110239	0.140664	0.645161	0.354839	0	1.7244	0.994866	NA	0.729538
CACNG7	19	54415990	54446969	+	0.0110796	0.140664	0.677419	0.322581	0	3.45984	0.740466	NA	2.71937
STOM	9	124101265	124132582	-	0.0110944	0.140664	0.645161	0.322581	0.0322581	2.38523	1.13403	-0.350809	1.38619
UTP20	12	101673904	101780397	+	0.0111028	0.140664	0.580645	0.419355	0	1.34162	0.712511	NA	0.629109
DCTN3	9	34613541	34620520	-	0.0111253	0.140664	0.580645	0.387097	0.0322581	1.76749	0.94663	0.859924	0.827525
MRGBP	20	61427756	61433090	+	0.0111439	0.140664	0.677419	0.322581	0	1.58894	0.705656	NA	0.883289
DHX40	17	57642885	57685713	+	0.0111475	0.140664	0.677419	0.322581	0	1.7785	0.732627	NA	1.04588
PCDHGA8	5	140771482	140774970	+	0.0111557	0.140664	0.580645	0.419355	0	2.43591	0.69142	NA	1.74449
DCAF4	14	73393039	73426357	+	0.0112489	0.141415	0.612903	0.387097	0	0.993805	0.3119	NA	0.681905
FAM20A	17	66531256	66597095	-	0.0112532	0.141415	0.677419	0.322581	0	4.96729	2.81965	NA	2.14764
TTC26	7	138818489	138846089	+	0.0112783	0.141468	0.645161	0.354839	0	2.48009	0.964331	NA	1.51576
DDX23	12	49223538	49245957	-	0.0112955	0.141468	0.645161	0.354839	0	1.64249	1.06606	NA	0.576432
NDUFS7	19	1383882	1395588	+	0.0113195	0.141532	0.612903	0.387097	0	1.87132	1.09295	NA	0.778367
ARSK	5	94890824	94940806	+	0.0113579	0.141774	0.612903	0.387097	0	1.55746	0.470376	NA	1.08708
MAP9	4	156263809	156298122	-	0.0113776	0.141782	0.516129	0.483871	0	3.36928	1.78019	NA	1.58909
SYNGR4	19	48867650	48879634	+	0.0114609	0.142126	0.677419	0.322581	0	4.51486	1.2709	NA	3.24395
ZNF92	7	64838711	64866048	+	0.0114751	0.142126	0.645161	0.354839	0	2.35251	1.17835	NA	1.17416
NAP1L5	4	89617063	89619386	-	0.0114792	0.142126	0.580645	0.419355	0	3.8942	1.3965	NA	2.49769
ZNF208	19	22122567	22193745	-	0.0114814	0.142126	0.645161	0.354839	0	-0.891708	1.03719	NA	-1.9289
USPL1	13	31191815	31234907	+	0.0115679	0.142959	0.580645	0.322581	0.0967742	1.79937	0.620116	0.339594	1.24399
UBE2E1	3	23847383	23933131	+	0.0116454	0.143678	0.16129	0.806452	0.0322581	1.78847	0.683759	1.8046	1.0616
COL26A1	7	101006100	101202304	+	0.0117141	0.144286	0.645161	0.354839	0	0.907288	-1.34926	NA	2.25655
ZNF823	19	11832079	11849824	-	0.0117583	0.144389	0.612903	0.387097	0	1.65529	0.670346	NA	0.984943
NPDC1	9	139933908	139940676	-	0.0117611	0.144389	0.580645	0.387097	0.0322581	3.12497	1.39185	2.90114	1.61702
SPEF2	5	35617988	35671676	+	0.011797	0.144591	0.580645	0.419355	0	1.6316	0.43964	NA	1.19196
GLTSCR2	19	48248792	48260323	+	0.0118772	0.145335	0.677419	0.322581	0	-0.979842	-0.374439	NA	-0.605403
PIGU	20	33148345	33265089	-	0.0119103	0.145501	0.709677	0.290323	0	2.41615	1.07059	NA	1.34556
FRRS1L	9	111892572	111929571	-	0.0120197	0.146106	0.580645	0.387097	0.0322581	5.80707	1.52506	8.24301	3.76524
CDK20	9	90581355	90589695	-	0.0120213	0.146106	0.580645	0.387097	0.0322581	2.28601	1.08536	0.275126	1.26297
TBCB	19	36605887	36616849	+	0.0120351	0.146106	0.677419	0.322581	0	2.61539	1.69251	NA	0.922886
IL17RC	3	9958757	9975305	+	0.012067	0.146106	0.16129	0.806452	0.0322581	1.31028	0.568407	0.0776393	0.760748
PARD6G	18	77915114	78005397	-	0.0120712	0.146106	0.483871	0.451613	0.0645161	2.08908	0.883337	0.655453	1.23423
TTI1	20	36611408	36661870	-	0.0121242	0.146106	0.677419	0.322581	0	1.40208	0.460631	NA	0.941452
UBA52	19	18682539	18688270	+	0.0121251	0.146106	0.645161	0.354839	0	-0.84837	0.687876	NA	-1.53625
PAM	5	102090486	102366809	+	0.0121363	0.146106	0.612903	0.387097	0	3.00035	0.840903	NA	2.15945
GGT6	17	4460221	4463891	-	0.0121639	0.146202	0.483871	0.451613	0.0645161	-7.58635	-5.93464	-7.30103	-1.48091
UBAP2	9	33921690	34048947	-	0.0122435	0.146828	0.580645	0.387097	0.0322581	1.60628	0.875516	0.0304363	0.795773
NNT	5	43602790	43705668	+	0.0122554	0.146828	0.612903	0.387097	0	1.56873	0.898467	NA	0.670266
SH3GLB2	9	131770070	131790632	-	0.0123645	0.147898	0.580645	0.387097	0.0322581	1.30926	-0.124218	0.140331	1.41313
TVP23C-CDRT4	17	15339331	15466945	-	0.0124726	0.14852	0.516129	0.419355	0.0645161	-2.11627	0.673782	1.23416	-2.86477
MBD1	18	47793251	47808144	-	0.0124811	0.14852	0.516129	0.419355	0.0645161	1.72366	1.08518	0.71938	0.687251
PCDHGA2	5	140718326	140892546	+	0.012483	0.14852	0.580645	0.419355	0	2.16406	0.28436	NA	1.8797
ZNF713	7	55954969	56009918	+	0.0124963	0.14852	0.645161	0.354839	0	2.37617	1.37215	NA	1.00402
BTC	4	75669968	75719896	-	0.0125431	0.148736	0.612903	0.387097	0	2.27331	-0.33867	NA	2.61198
PCDHA3	5	140180782	140391929	+	0.0125544	0.148736	0.580645	0.419355	0	2.78161	0.380564	NA	2.40105
UBAC1	9	138824814	138853226	-	0.0125932	0.148749	0.612903	0.354839	0.0322581	1.95153	1.08909	0.598353	0.903335
CNGA1	4	47937993	47983550	-	0.0126079	0.148749	0.612903	0.387097	0	0.609534	-1.20635	NA	1.81588
SYDE1	19	15218174	15225799	+	0.012628	0.148749	0.645161	0.354839	0	1.80324	0.444384	NA	1.35885
MED31	17	6546632	6554954	-	0.0126353	0.148749	0.483871	0.451613	0.0645161	2.76024	1.68217	1.97842	1.04104
ICA1	7	8152813	8301682	-	0.0127447	0.1498	0.645161	0.354839	0	0.973262	0.138887	NA	0.834375
ZNF491	19	11909390	11919306	+	0.0128025	0.150243	0.612903	0.387097	0	2.86179	1.25319	NA	1.6086
CTAGE5	14	39734487	39856156	+	0.0128372	0.150413	0.612903	0.387097	0	-0.426251	1.0058	NA	-1.43205
COL6A2	21	47518032	47549719	+	0.0128839	0.150723	0.16129	0.741935	0.0967742	3.49198	2.10194	0.289151	1.5992
SMG9	19	44232148	44259188	-	0.0129326	0.151056	0.677419	0.322581	0	2.3661	0.605265	NA	1.76084
PSMD11	17	30771480	30810337	-	0.0129726	0.151286	0.709677	0.290323	0	2.11644	1.07764	NA	1.03879
INPP5E	9	139323066	139334274	-	0.0130414	0.15185	0.580645	0.387097	0.0322581	2.07834	1.11298	0.213171	1.03457
ATG2B	14	96745538	96829738	-	0.0131051	0.152126	0.612903	0.387097	0	1.07327	0.259095	NA	0.814171
PRKAR2B	7	106685177	106802256	+	0.0131058	0.152126	0.645161	0.354839	0	1.87025	0.00811235	NA	1.86214
CETN3	5	89689151	89705603	-	0.0131606	0.152524	0.645161	0.354839	0	2.67792	1.179	NA	1.49892
NCOA6	20	33302577	33370207	-	0.0132198	0.152972	0.709677	0.290323	0	1.78462	0.7163	NA	1.06832
ZNF536	19	30863299	31048966	+	0.013355	0.154114	0.677419	0.322581	0	2.60918	-0.440553	NA	3.04974
KMT2C	7	151832009	152133090	-	0.0133615	0.154114	0.645161	0.354839	0	1.42965	0.420029	NA	1.00962
GTPBP10	7	89975978	90020769	+	0.0133805	0.154114	0.645161	0.354839	0	1.59184	0.793822	NA	0.798021
RGS7BP	5	63801773	63908126	+	0.0134346	0.154498	0.580645	0.419355	0	4.03307	1.46553	NA	2.56754
PCDHGB2	5	140739702	140892546	+	0.0134678	0.154641	0.580645	0.419355	0	3.21795	1.3473	NA	1.87066
CYP4F3	19	15751706	15771570	+	0.013503	0.154665	0.612903	0.387097	0	5.72466	3.19822	NA	2.52644
PARM1	4	75858284	75975325	+	0.0135114	0.154665	0.580645	0.419355	0	2.92944	0.983104	NA	1.94634
MPP6	7	24612964	24733322	+	0.0135938	0.15537	0.709677	0.290323	0	0.698384	-1.42594	NA	2.12432
TP53I13	17	27895293	27900175	+	0.0136282	0.155452	0.709677	0.225806	0.0645161	2.17788	0.424824	1.76918	1.45431
VPS41	7	38763542	38948800	-	0.0136428	0.155452	0.645161	0.354839	0	2.00221	0.868488	NA	1.13372
RTFDC1	20	55043640	55093942	+	0.0137902	0.156744	0.677419	0.322581	0	1.78205	0.362746	NA	1.41931
ZMYND15	17	4643309	4649414	+	0.0138045	0.156744	0.483871	0.451613	0.0645161	2.88476	1.70634	0.176316	1.36968
SON	21	34915343	34931362	+	0.0138192	0.156744	0.16129	0.741935	0.0967742	1.7974	0.725984	1.42219	0.991083
WDR31	9	116075501	116102620	-	0.0138532	0.156891	0.580645	0.387097	0.0322581	1.76986	0.535103	1.6496	1.14903
SDSL	12	113860194	113876081	+	0.0138814	0.156971	0.580645	0.419355	0	1.30596	0.517697	NA	0.788261
C9orf106	9	132083294	132084882	+	0.0139352	0.157341	0.580645	0.387097	0.0322581	2.45327	0.896638	2.18175	1.45777
WBSCR16	7	74765875	74789332	-	0.0139681	0.157474	0.516129	0.483871	0	1.4572	0.745371	NA	0.711829
PMPCA	9	139305024	139318213	+	0.0140129	0.157741	0.580645	0.387097	0.0322581	2.13656	0.940874	0.0874286	1.26134
FUBP3	9	133454959	133513739	+	0.014071	0.158155	0.612903	0.354839	0.0322581	2.10542	1.15315	1.75622	0.902015
LGI2	4	25000470	25032414	-	0.0141187	0.158453	0.580645	0.419355	0	2.57818	0.589417	NA	1.98876
MEST	7	130126015	130146138	+	0.0142202	0.158789	0.612903	0.387097	0	1.77209	0.668534	NA	1.10356
NEK3	13	52706778	52733670	-	0.014223	0.158789	0.580645	0.322581	0.0967742	1.57828	0.788601	0.506144	0.854866
CCDC40	17	78010430	78043216	+	0.0142496	0.158789	0.645161	0.354839	0	2.63456	1.0981	NA	1.53647
MAFB	20	39314487	39317880	-	0.0142647	0.158789	0.677419	0.322581	0	4.33917	1.71629	NA	2.62288
TTC9	14	71108503	71142077	+	0.0142669	0.158789	0.612903	0.387097	0	3.20244	1.69863	NA	1.50381
PRKD1	14	30045684	30396899	-	0.0142765	0.158789	0.612903	0.387097	0	2.02524	0.663897	NA	1.36134
STAC	3	36421978	36589499	+	0.0143779	0.159678	0.16129	0.806452	0.0322581	4.84723	2.45984	1.51901	2.42358
PLEKHG6	12	6419601	6437672	+	0.0144882	0.160131	0.580645	0.419355	0	1.89731	0.615139	NA	1.28217
TMEM160	19	47549166	47551882	-	0.0144973	0.160131	0.677419	0.322581	0	1.674	0.652745	NA	1.02125
LONP1	19	5691844	5720176	-	0.014529	0.160131	0.645161	0.354839	0	1.61272	0.951876	NA	0.66084
CDK5RAP3	17	46047893	46059152	+	0.0145516	0.160131	0.709677	0.290323	0	1.25454	0.188785	NA	1.06575
IGFBP6	12	53491435	53496128	+	0.014563	0.160131	0.645161	0.354839	0	1.58213	-0.0645083	NA	1.64664
FAM122A	9	71394921	71398795	+	0.0145669	0.160131	0.580645	0.387097	0.0322581	2.07903	1.07998	2.25045	0.909021
PP2D1	3	20021452	20053765	-	0.0145987	0.160131	0.16129	0.806452	0.0322581	0.924789	-0.120408	-0.75163	1.06947
POLR2J	7	102113546	102119381	-	0.0146117	0.160131	0.612903	0.387097	0	1.35724	-0.199989	NA	1.55723
ROMO1	20	34287231	34288902	+	0.0146317	0.160131	0.677419	0.290323	0.0322581	1.92631	0.127586	1.08232	1.70325
USP20	9	132597695	132644117	+	0.0146669	0.160131	0.580645	0.387097	0.0322581	1.6711	0.750698	0.379352	0.948964
PNMAL1	19	46969747	46974820	-	0.0146676	0.160131	0.677419	0.322581	0	3.89305	0.684276	NA	3.20877
RHOH	4	40192630	40246384	+	0.0147184	0.160131	0.612903	0.387097	0	0.924645	2.39357	NA	-1.46893
C7orf43	7	99752042	99756344	-	0.0147187	0.160131	0.645161	0.322581	0.0322581	1.96362	1.25209	0.838288	0.749156
ZNF227	19	44716680	44741421	+	0.0147195	0.160131	0.677419	0.322581	0	2.57419	1.14503	NA	1.42916
SVOP	12	109301904	109459045	-	0.0147788	0.160476	0.516129	0.483871	0	6.6276	3.38945	NA	3.23815
GPI	19	34855644	34893318	+	0.0148071	0.160476	0.677419	0.322581	0	3.10222	1.87542	NA	1.2268
FAIM2	12	50260678	50297760	-	0.0148202	0.160476	0.645161	0.354839	0	2.27628	-0.366699	NA	2.64297
SNAPC4	9	139270020	139292889	-	0.0149296	0.160476	0.580645	0.387097	0.0322581	1.62908	0.650814	0.408394	0.996913
SRPK2	7	104756820	104909524	-	0.0149359	0.160476	0.645161	0.354839	0	1.97689	0.967003	NA	1.00989
ANKDD1B	5	74907300	74967671	+	0.0149695	0.160476	0.645161	0.354839	0	1.4846	-0.479308	NA	1.96391
FAM71F2	7	128312319	128327926	+	0.0149964	0.160476	0.645161	0.354839	0	2.15043	0.488328	NA	1.6621
PRDM4	12	108126642	108154914	-	0.0150469	0.160476	0.516129	0.483871	0	1.89079	0.971854	NA	0.918936
CCDC159	19	11457180	11465620	+	0.015073	0.160476	0.645161	0.354839	0	1.92918	0.961799	NA	0.967382
RAB2B	14	21927178	21944832	-	0.015092	0.160476	0.580645	0.419355	0	2.71763	1.77027	NA	0.947361
FANCC	9	97861335	98079536	-	0.0151056	0.160476	0.548387	0.387097	0.0645161	1.6386	0.872399	0.290514	0.849328
CENPJ	13	25456411	25497027	-	0.0151182	0.160476	0.548387	0.354839	0.0967742	2.58153	1.89357	0.412595	1.00531
MPPE1	18	11883469	11908796	-	0.0151366	0.160476	0.548387	0.387097	0.0645161	0.965309	0.0401333	0.667366	0.835571
CCDC88C	14	91737666	91884188	-	0.015141	0.160476	0.612903	0.387097	0	-1.04598	0.578326	NA	-1.62431
NAAA	4	76831807	76862166	-	0.0151516	0.160476	0.612903	0.387097	0	3.34813	1.75186	NA	1.59628
FLT3	13	28577410	28674729	-	0.0152039	0.160476	0.580645	0.322581	0.0967742	-3.54753	-1.71015	-3.14969	-1.50517
DAPK1	9	90112142	90323549	+	0.0152074	0.160476	0.580645	0.387097	0.0322581	1.27246	0.0595676	-1.01777	1.29577
SPON2	4	1160719	1202750	-	0.0152154	0.160476	0.645161	0.354839	0	2.24929	0.916659	NA	1.33263
TUBA1A	12	49578577	49583107	-	0.0152173	0.160476	0.645161	0.354839	0	3.85851	2.28293	NA	1.57558
NFX1	9	33290414	33348721	+	0.0152204	0.160476	0.548387	0.387097	0.0645161	1.31325	0.785384	-0.301832	0.683178
ZBTB34	9	129622943	129648157	+	0.0152302	0.160476	0.548387	0.419355	0.0322581	2.08736	0.899976	0.38851	1.22391
C9orf172	9	139738866	139741797	+	0.0152519	0.160476	0.580645	0.387097	0.0322581	3.34872	1.52704	2.46114	1.74983
RLN2	9	5299863	5304228	-	0.0152579	0.160476	0.516129	0.451613	0.0322581	4.36257	2.30487	3.53605	1.97563
STX1A	7	73113534	73134017	-	0.0152681	0.160476	0.645161	0.354839	0	4.84249	2.06398	NA	2.77852
LRSAM1	9	130213764	130265780	+	0.0153108	0.160698	0.548387	0.419355	0.0322581	2.5263	1.7235	1.53678	0.816138
RAE1	20	55926144	55953519	+	0.0153722	0.160897	0.677419	0.322581	0	2.43604	1.36407	NA	1.07197
PCDH20	13	61983817	61989655	-	0.0153912	0.160897	0.580645	0.322581	0.0967742	4.95686	1.65199	1.9774	3.22978
SMG6	17	1963132	2140141	-	0.0153945	0.160897	0.483871	0.451613	0.0645161	2.48699	1.45854	0.982577	1.08795
LGALS3BP	17	76967334	76976061	-	0.0154424	0.161139	0.645161	0.354839	0	3.12365	1.3189	NA	1.80474
KLHL9	9	21329669	21335431	-	0.0154609	0.161139	0.548387	0.387097	0.0645161	1.68647	1.10223	0.287416	0.700639
COX18	4	73920412	73935476	-	0.0155168	0.161496	0.580645	0.419355	0	1.26802	0.754597	NA	0.513423
C9orf117	9	130469270	130476303	+	0.0156464	0.162394	0.548387	0.419355	0.0322581	3.03305	1.8781	-0.155722	1.30022
ZBTB26	9	125680307	125693544	-	0.0156467	0.162394	0.645161	0.322581	0.0322581	2.06113	0.294311	1.96036	1.61536
IFT122	3	129158878	129239350	+	0.0157009	0.162462	0.16129	0.806452	0.0322581	1.81317	0.769329	-0.0327578	1.07469
ALKBH6	19	36500017	36505145	-	0.0157167	0.162462	0.677419	0.322581	0	2.49018	1.0438	NA	1.44639
SPATA24	5	138732455	138739776	-	0.0157186	0.162462	0.612903	0.387097	0	1.52307	0.535261	NA	0.987814
SEC13	3	10342612	10362725	-	0.0157643	0.162709	0.16129	0.806452	0.0322581	1.10969	0.387468	-2.60937	0.837485
CRELD1	3	9975523	9987097	+	0.0157901	0.162749	0.16129	0.806452	0.0322581	1.89143	0.928524	-0.458567	1.01626
DVL2	17	7128660	7137863	-	0.0158147	0.162778	0.483871	0.451613	0.0645161	2.45157	1.741	0.815564	0.826254
MACROD2	20	13976145	16033842	+	0.0158716	0.163138	0.709677	0.258065	0.0322581	2.77726	0.591459	0.288004	2.21952
BANK1	4	102711763	102995969	+	0.0159547	0.163766	0.580645	0.419355	0	3.48986	1.33087	NA	2.15899
CPEB4	5	173315330	173387994	+	0.0160003	0.164008	0.612903	0.387097	0	1.02334	0.0211479	NA	1.0022
CHCHD4	3	14153576	14166371	-	0.0160495	0.164255	0.16129	0.806452	0.0322581	1.31856	0.697128	-0.1546	0.654195
CERS1	19	18979354	19006953	-	0.0160765	0.164255	0.645161	0.354839	0	4.35115	1.31334	NA	3.03781
CSRNP2	12	51454987	51477437	-	0.0160905	0.164255	0.645161	0.354839	0	2.56282	1.52598	NA	1.03684
ZFYVE26	14	68213236	68283306	-	0.0161704	0.164575	0.612903	0.387097	0	2.15407	1.26065	NA	0.893425
LRP2BP	4	186285031	186300152	-	0.0162053	0.164575	0.548387	0.451613	0	2.89964	1.50713	NA	1.39251
CSRNP1	3	39183341	39195102	-	0.0162354	0.164575	0.16129	0.806452	0.0322581	1.44731	-0.259956	-2.55546	1.79555
CORO2A	9	100883256	100935174	-	0.0162613	0.164575	0.548387	0.387097	0.0645161	3.42608	1.31092	3.80397	1.75901
SDCCAG3	9	139296373	139305054	-	0.016276	0.164575	0.580645	0.387097	0.0322581	1.08836	0.636316	-0.400357	0.531786
SCIN	7	12610202	12693228	+	0.0162787	0.164575	0.645161	0.354839	0	4.82036	1.51598	NA	3.30438
FITM1	14	24600674	24602058	+	0.0162793	0.164575	0.612903	0.387097	0	-3.53476	-1.56999	NA	-1.96477
SH2D3C	9	130500595	130517561	-	0.0163102	0.164575	0.548387	0.419355	0.0322581	3.60332	1.7205	1.67451	1.88611
PEX1	7	92116336	92157845	-	0.0163242	0.164575	0.645161	0.354839	0	1.45072	0.729563	NA	0.721157
BBC3	19	47724078	47734451	-	0.0163535	0.164575	0.677419	0.322581	0	0.748597	-0.384938	NA	1.13353
RBM42	19	36119917	36128588	+	0.0163647	0.164575	0.677419	0.322581	0	1.59279	0.870686	NA	0.722108
DTD1	20	18568536	18612822	+	0.0164153	0.164579	0.709677	0.258065	0.0322581	1.92418	1.17399	-0.0106745	0.881813
SNCAIP	5	121647385	121799914	+	0.0164469	0.164579	0.612903	0.387097	0	3.52941	1.37741	NA	2.152
TIAM1	21	32490735	32931290	-	0.0164523	0.164579	0.16129	0.741935	0.0967742	4.52167	2.95405	5.07562	1.32282
METTL6	3	15451266	15469054	-	0.016455	0.164579	0.16129	0.806452	0.0322581	1.63393	1.19585	2.4065	0.391518
PPAP2C	19	281043	291169	-	0.0164755	0.164579	0.580645	0.419355	0	-1.66148	0.627054	NA	-2.28854
KDM4C	9	6720862	7077264	+	0.0165167	0.164769	0.516129	0.451613	0.0322581	1.19667	0.614982	0.67789	0.577492
VSTM2L	20	36531498	36573752	+	0.0165981	0.16536	0.677419	0.322581	0	4.53552	2.59711	NA	1.93841
BFSP1	20	17474549	17512014	-	0.0167102	0.166147	0.709677	0.258065	0.0322581	2.18304	0.5432	1.63179	1.51888
FBXW2	9	123519253	123555740	-	0.0167289	0.166147	0.645161	0.322581	0.0322581	1.44037	0.652131	0.6826	0.785464
JAK2	9	4985085	5128183	+	0.016744	0.166147	0.516129	0.451613	0.0322581	2.77363	1.51163	2.28207	1.21064
PRIM1	12	57125363	57146146	-	0.0168389	0.166866	0.580645	0.419355	0	0.321428	1.40113	NA	-1.0797
MET	7	116312412	116438440	+	0.0168889	0.167139	0.645161	0.354839	0	1.27682	-0.682401	NA	1.95922
TLN1	9	35697333	35732392	-	0.0169369	0.167392	0.580645	0.387097	0.0322581	1.5301	0.725274	-0.556445	0.903423
PHLPP1	18	60382671	60647676	+	0.0170025	0.167789	0.516129	0.419355	0.0645161	0.772159	-0.316224	-0.0895596	1.05816
RPN1	3	128338812	128369719	-	0.0170303	0.167789	0.16129	0.806452	0.0322581	1.74316	0.992703	-0.792311	0.819113
NDUFA4L2	12	57628685	57634545	-	0.0170446	0.167789	0.580645	0.419355	0	3.63804	1.37717	NA	2.26087
ASXL3	18	31158540	31331159	+	0.0171057	0.168168	0.580645	0.354839	0.0645161	4.52779	2.08624	1.15095	2.58545
MBLAC1	7	99724316	99726121	+	0.0171612	0.168492	0.645161	0.322581	0.0322581	2.31826	1.19952	0.63162	1.17037
INTS2	17	59942727	60005377	-	0.0172631	0.169058	0.677419	0.322581	0	2.87866	1.78286	NA	1.0958
C19orf81	19	51152701	51162567	+	0.0173316	0.169458	0.677419	0.322581	0	3.90981	0.847206	NA	3.0626
PTGER4	5	40680031	40693837	-	0.0173505	0.169458	0.612903	0.387097	0	-3.42873	-1.61407	NA	-1.81466
KBTBD6	13	41701708	41706936	-	0.0174505	0.169951	0.580645	0.322581	0.0967742	2.67084	1.83447	1.84539	0.833845
NFE2L1	17	46125666	46138907	+	0.0174516	0.169951	0.709677	0.290323	0	2.67321	0.899616	NA	1.7736
CAMKK2	12	121675494	121712388	-	0.0175504	0.170516	0.580645	0.419355	0	-1.07384	0.315234	NA	-1.38908
PIGL	17	16120508	16229573	+	0.0176601	0.171268	0.516129	0.419355	0.0645161	1.3729	0.437315	0.414357	0.938651
PLAA	9	26903367	26947468	-	0.0176861	0.171268	0.516129	0.419355	0.0645161	1.84095	1.14559	0.540971	0.775978
NUPL2	7	23221445	23240630	+	0.0176967	0.171268	0.709677	0.290323	0	2.39296	0.616901	NA	1.77606
AKAP10	17	19807614	19881169	-	0.0177964	0.17162	0.516129	0.419355	0.0645161	1.94305	1.33923	0.72388	0.68587
KCNJ14	19	48958963	48969367	+	0.0178175	0.17162	0.677419	0.322581	0	2.11324	0.482112	NA	1.63113
PELI2	14	56585092	56768031	+	0.0178673	0.17162	0.612903	0.387097	0	-1.36499	-0.150403	NA	-1.21459
BCAT1	12	24962957	25055322	-	0.0178759	0.17162	0.516129	0.483871	0	-4.32264	-2.55946	NA	-1.76318
SYT5	19	55684463	55690811	-	0.0178794	0.17162	0.677419	0.322581	0	5.76142	1.40611	NA	4.3553
KCNAB3	17	7825176	7832753	-	0.017888	0.17162	0.516129	0.419355	0.0645161	1.83781	0.402573	1.18333	1.33114
ZNF333	19	14800851	14844558	+	0.0179312	0.17162	0.645161	0.354839	0	1.53244	0.324146	NA	1.20829
C14orf37	14	58470773	58618957	-	0.0179393	0.17162	0.612903	0.387097	0	3.41822	1.57006	NA	1.84817
RANGRF	17	8191814	8193410	+	0.0179404	0.17162	0.516129	0.419355	0.0645161	2.90383	1.86441	1.65858	1.06687
TMOD1	9	100263461	100364025	+	0.0179862	0.17172	0.548387	0.387097	0.0645161	2.19339	-0.205806	0.221102	2.3382
SEMA4D	9	91975705	92094611	-	0.017997	0.17172	0.580645	0.387097	0.0322581	2.04145	0.874338	1.20379	1.14177
ARHGAP44	17	12692828	12894961	+	0.0180272	0.171789	0.516129	0.419355	0.0645161	2.55769	1.06803	0.614532	1.55012
CYP3A5	7	99245811	99277649	-	0.0180571	0.171854	0.645161	0.322581	0.0322581	2.43879	0.654377	-1.62728	1.99183
DGKQ	4	952671	967348	-	0.0180931	0.171977	0.612903	0.387097	0	1.11125	0.331415	NA	0.779832
GAPVD1	9	128024072	128127290	+	0.0182094	0.172862	0.612903	0.354839	0.0322581	1.744	0.989494	-0.498206	0.878482
EGFL7	9	139553307	139567130	+	0.0183125	0.173471	0.580645	0.387097	0.0322581	3.94251	2.13081	0.0306874	1.97326
HINT2	9	35812956	35815042	-	0.0183201	0.173471	0.580645	0.387097	0.0322581	1.59262	0.42961	1.64479	1.06953
C19orf80	19	11350294	11352619	+	0.018369	0.17355	0.645161	0.354839	0	0.852046	3.45408	NA	-2.60204
HAUS6	9	19053134	19102940	-	0.0183862	0.17355	0.580645	0.387097	0.0322581	1.98978	1.24891	1.72443	0.704298
SNTA1	20	31995762	32031698	-	0.0184013	0.17355	0.709677	0.290323	0	1.6415	0.22658	NA	1.41492
DACH1	13	72012097	72441330	-	0.0184438	0.17355	0.580645	0.322581	0.0967742	2.64995	1.22206	-0.688429	1.86877
GATAD1	7	92076761	92089381	+	0.0184449	0.17355	0.645161	0.354839	0	1.07078	0.416595	NA	0.654189
RFFL	17	33336130	33390759	-	0.0185297	0.174008	0.709677	0.290323	0	1.48893	0.198645	NA	1.29029
SYNDIG1	20	24449834	24647253	+	0.0185454	0.174008	0.709677	0.258065	0.0322581	4.87167	1.57909	-1.72833	3.66006
KCNJ16	17	68071365	68131749	+	0.0185637	0.174008	0.677419	0.322581	0	-1.16142	-4.21098	NA	3.04957
CAMTA2	17	4871286	4890665	-	0.0186338	0.174446	0.483871	0.451613	0.0645161	1.51374	0.845429	-0.614232	0.850772
PCDHGA9	5	140782519	140785006	+	0.0187088	0.174766	0.580645	0.419355	0	2.45629	0.897616	NA	1.55868
ZNF483	9	114287438	114306712	+	0.0187149	0.174766	0.580645	0.387097	0.0322581	4.65581	2.11481	3.77125	2.41359
ICAM2	17	62079954	62084283	-	0.0188881	0.176001	0.677419	0.322581	0	-0.570405	1.30243	NA	-1.87283
CDCA3	12	6955888	6961094	-	0.0188943	0.176001	0.580645	0.419355	0	3.62325	2.4087	NA	1.21455
WDR19	4	39184023	39287430	+	0.0189672	0.176458	0.612903	0.387097	0	2.80616	1.38054	NA	1.42562
CACNB1	17	37329708	37353956	-	0.0190739	0.176947	0.677419	0.322581	0	3.36506	1.84769	NA	1.51738
AATK	17	79091094	79105748	-	0.0191099	0.176947	0.645161	0.354839	0	0.456107	-0.887285	NA	1.34339
ARGLU1	13	107195661	107220514	-	0.0191537	0.176947	0.580645	0.322581	0.0967742	2.27532	1.34822	0.581489	1.10404
DOCK4	7	111366163	111846462	-	0.0191567	0.176947	0.645161	0.354839	0	2.77812	1.47892	NA	1.2992
TMEM238	19	55890611	55895627	-	0.0191601	0.176947	0.677419	0.322581	0	0.0280154	1.47939	NA	-1.45138
LARS	5	145492588	145562350	-	0.0191621	0.176947	0.580645	0.419355	0	0.772995	0.336174	NA	0.436821
HEXB	5	73935847	74017113	+	0.0192465	0.177447	0.645161	0.354839	0	1.49238	0.688389	NA	0.803987
TRAPPC10	21	45432205	45526433	+	0.0192727	0.177447	0.16129	0.741935	0.0967742	1.86368	0.98864	1.05066	0.867887
AKNA	9	117098406	117150243	-	0.0193174	0.177447	0.548387	0.419355	0.0322581	1.66112	0.818819	-1.51428	1.00895
SYCN	19	39693470	39694906	-	0.0193396	0.177447	0.677419	0.322581	0	-12.9044	-7.55691	NA	-5.34746
CDH6	5	31193761	31329253	+	0.019349	0.177447	0.612903	0.387097	0	4.54274	2.58138	NA	1.96137
FANCG	9	35073834	35080013	-	0.0193592	0.177447	0.580645	0.387097	0.0322581	1.2287	0.327554	-0.0853482	0.932911
SPAG5	17	26904582	26926056	-	0.0193857	0.177449	0.709677	0.258065	0.0322581	3.68276	2.17486	2.04852	1.52194
DHX8	17	41561232	41601689	+	0.01944	0.177449	0.709677	0.290323	0	1.89271	1.16095	NA	0.731756
STRADA	17	61780191	61819330	-	0.0194474	0.177449	0.677419	0.322581	0	2.02531	0.905192	NA	1.12012
PPP1R1A	12	54973023	54982443	+	0.0194598	0.177449	0.580645	0.419355	0	2.888	-0.670844	NA	3.55884
CPNE1	20	34213952	34241831	-	0.0194828	0.177449	0.677419	0.290323	0.0322581	2.09864	1.46496	0.970328	0.683146
EFCAB4B	12	3724100	3862366	-	0.0195154	0.177449	0.580645	0.419355	0	-1.40705	0.29305	NA	-1.7001
CYP46A1	14	100150754	100193638	+	0.019526	0.177449	0.612903	0.387097	0	3.71505	1.36707	NA	2.34797
APLP1	19	36359346	36370699	+	0.0195672	0.177566	0.677419	0.322581	0	3.70802	1.14935	NA	2.55867
MLF2	12	6857157	6862082	-	0.019603	0.177566	0.580645	0.419355	0	1.60336	1.09319	NA	0.510166
FAM102A	9	130702860	130712993	-	0.0197204	0.178065	0.612903	0.354839	0.0322581	2.00152	0.157737	-2.05138	2.02788
NANP	20	25593570	25604648	-	0.0197353	0.178065	0.645161	0.354839	0	1.50187	0.753687	NA	0.748186
TRAPPC13	5	64920557	64926532	+	0.0197372	0.178065	0.580645	0.419355	0	2.37103	1.28311	NA	1.08792
SYT3	19	51125233	51141302	-	0.0198086	0.178294	0.677419	0.322581	0	4.24111	1.69235	NA	2.54876
EHMT1	9	140513443	140678845	+	0.0198105	0.178294	0.580645	0.387097	0.0322581	1.41762	0.825343	0.3093	0.631967
ASIC3	7	150745378	150749843	+	0.019856	0.178488	0.645161	0.354839	0	3.46382	1.69113	NA	1.77269
POMT1	9	134378288	134399193	+	0.0198873	0.178554	0.612903	0.354839	0.0322581	1.59956	0.788122	0.588131	0.828108
TBC1D2	9	100961279	100975833	-	0.0199299	0.178722	0.548387	0.387097	0.0645161	2.43347	1.54452	1.69106	0.868017
GNAS	20	57414772	57486251	+	0.0200217	0.178938	0.677419	0.322581	0	2.07051	0.270873	NA	1.79964
ADD1	4	2845583	2931803	+	0.0200411	0.178938	0.580645	0.419355	0	1.96646	0.588126	NA	1.37833
CDKL2	4	76501703	76555724	-	0.0200445	0.178938	0.612903	0.387097	0	3.24129	1.70185	NA	1.53944
TMEM184A	7	1581870	1596066	-	0.0200718	0.178938	0.645161	0.354839	0	1.16008	0.0358441	NA	1.12423
DTNA	18	32073253	32409292	+	0.020074	0.178938	0.580645	0.354839	0.0645161	1.18972	0.152354	0.115358	1.04306
ACTL6B	7	100240719	100254084	-	0.0201376	0.179166	0.645161	0.354839	0	5.38124	2.79628	NA	2.58496
RAB43	3	128806411	128840647	-	0.0201478	0.179166	0.16129	0.806452	0.0322581	0.965211	0.19177	-2.22829	0.86652
SLITRK5	13	88324869	88331871	+	0.0202523	0.179881	0.580645	0.322581	0.0967742	0.23309	-1.31284	-2.2697	1.76674
EML5	14	89081173	89259096	-	0.02031	0.179961	0.612903	0.387097	0	2.36784	1.03929	NA	1.32855
COG1	17	71189172	71204646	+	0.020326	0.179961	0.677419	0.322581	0	1.63204	0.541193	NA	1.09085
ZNF681	19	23921996	23941693	-	0.0203571	0.179961	0.645161	0.354839	0	0.206491	1.63521	NA	-1.42872
CCDC146	7	76751933	76924521	+	0.020358	0.179961	0.645161	0.354839	0	2.66571	1.13879	NA	1.52692
UBOX5	20	3088218	3140556	-	0.0203941	0.180067	0.709677	0.258065	0.0322581	1.45169	0.166449	0.110976	1.2914
CTNNAL1	9	111704848	111775874	-	0.0204643	0.180473	0.580645	0.387097	0.0322581	0.955747	0.0643991	-1.96168	1.0472
ZNF441	19	11877814	11894893	+	0.0205007	0.18054	0.612903	0.387097	0	2.87316	1.60287	NA	1.27029
QRICH2	17	74270129	74303761	-	0.0205203	0.18054	0.677419	0.322581	0	1.65983	0.641827	NA	1.018
RAB12	18	8609442	8639380	+	0.020572	0.180756	0.548387	0.387097	0.0645161	2.50655	1.47609	2.42831	0.894428
UQCRFS1	19	29698166	29704136	-	0.0205933	0.180756	0.677419	0.322581	0	1.24203	0.71528	NA	0.526748
NFKBIA	14	35870715	35873960	-	0.0206733	0.180858	0.612903	0.387097	0	1.28257	0.204955	NA	1.07762
PCTP	17	53828339	53900451	+	0.0206805	0.180858	0.645161	0.354839	0	-0.844091	0.703176	NA	-1.54727
APCDD1	18	10454624	10488698	+	0.0207069	0.180858	0.548387	0.387097	0.0645161	2.18016	0.655454	0.845586	1.49754
GNE	9	36214437	36258496	-	0.0207481	0.180858	0.580645	0.387097	0.0322581	2.25051	1.18789	0.750522	1.09627
COQ4	9	131084786	131096351	+	0.0207512	0.180858	0.580645	0.387097	0.0322581	0.684015	-0.290993	-0.475534	0.989203
PRKAB1	12	120105760	120119429	-	0.0207922	0.180858	0.580645	0.419355	0	1.4371	0.650783	NA	0.786313
C17orf85	17	3710044	3749545	-	0.0207991	0.180858	0.483871	0.451613	0.0645161	1.27965	0.775949	0.151908	0.581707
CLIP3	19	36505561	36523573	-	0.0208496	0.180971	0.677419	0.322581	0	5.79268	3.26988	NA	2.5228
CAPRIN2	12	30862485	30907448	-	0.0208607	0.180971	0.580645	0.419355	0	2.08389	1.15688	NA	0.927017
TGM2	20	36755788	36793831	-	0.0209253	0.18132	0.677419	0.322581	0	3.81027	1.19154	NA	2.61872
TNFSF11	13	43136871	43182149	+	0.0209885	0.181657	0.580645	0.322581	0.0967742	2.05243	0.788174	0.906325	1.23699
CCBL1	9	131595220	131644773	-	0.0210849	0.182156	0.580645	0.387097	0.0322581	2.24521	1.42674	0.390697	0.89817
GARS	7	30634350	30673649	+	0.0211171	0.182156	0.709677	0.290323	0	0.891279	0.41836	NA	0.472919
SNAP25	20	10199445	10288068	+	0.0211196	0.182156	0.709677	0.258065	0.0322581	5.50584	1.68672	5.24402	3.42386
NEURL2	20	44517110	44519926	-	0.0211732	0.18238	0.677419	0.322581	0	1.6916	-0.44459	NA	2.13619
CNTD1	17	40950853	40963605	+	0.0212115	0.18238	0.709677	0.290323	0	1.35639	0.0535104	NA	1.30288
RBBP8	18	20513294	20606449	+	0.0212248	0.18238	0.580645	0.354839	0.0645161	0.940786	-0.392446	-0.239983	1.30978
ZNF627	19	11708234	11729974	+	0.0212434	0.18238	0.645161	0.354839	0	1.95118	0.153479	NA	1.7977
GOLM1	9	88641055	88714510	-	0.0213041	0.182691	0.580645	0.387097	0.0322581	0.979169	0.0291578	-0.890988	1.02079
PTPRN2	7	157331745	158380494	+	0.021405	0.183134	0.645161	0.354839	0	2.4605	0.789074	NA	1.67142
BMP7	20	55743808	55841707	-	0.0214246	0.183134	0.677419	0.322581	0	2.58045	0.0713703	NA	2.50908
KRT10	17	38974368	38978863	-	0.0214295	0.183134	0.709677	0.290323	0	1.5382	0.74032	NA	0.797876
XRCC6BP1	12	58335323	58351052	+	0.0214795	0.183351	0.580645	0.419355	0	0.0756645	0.909172	NA	-0.833507
ZNF653	19	11594241	11616738	-	0.0215945	0.184122	0.645161	0.354839	0	2.27847	1.30517	NA	0.973299
RAB3C	5	57878014	58155221	+	0.0216323	0.184217	0.580645	0.419355	0	4.52152	1.52412	NA	2.9974
TECPR2	14	102829248	102932008	+	0.0216552	0.184217	0.612903	0.387097	0	2.12574	1.09021	NA	1.03553
PLXNA1	3	126707436	126756235	+	0.0217634	0.184762	0.16129	0.806452	0.0322581	1.86996	0.780364	-0.480039	1.13807
DIRAS1	19	2714564	2721390	-	0.0217688	0.184762	0.612903	0.387097	0	2.21127	0.67643	NA	1.53484
NUPR1L	7	56182373	56184093	-	0.0218246	0.184829	0.645161	0.354839	0	-1.58598	1.61719	NA	-3.20316
ZNF416	19	58082933	58090243	-	0.0218263	0.184829	0.645161	0.354839	0	2.80463	1.68897	NA	1.11566
FUT3	19	5842898	5851485	-	0.0218897	0.185156	0.645161	0.354839	0	-3.96678	-1.8417	NA	-2.12508
NOP56	20	2633177	2639039	+	0.0219415	0.185205	0.709677	0.258065	0.0322581	1.39898	0.507813	0.204396	0.92488
PTPN1	20	49126857	49201299	+	0.021963	0.185205	0.677419	0.322581	0	2.15041	0.981041	NA	1.16936
GARNL3	9	130025940	130155828	+	0.0219701	0.185205	0.548387	0.419355	0.0322581	2.22878	1.12544	0.199714	1.16946
C1QTNF7	4	15341559	15447791	+	0.0220776	0.185829	0.580645	0.419355	0	1.90672	-0.164307	NA	2.07103
ZNF622	5	16451627	16465894	-	0.022094	0.185829	0.612903	0.387097	0	-0.177637	0.350773	NA	-0.528411
PRMT1	19	50180408	50191707	+	0.0221319	0.185938	0.677419	0.322581	0	1.98641	1.26501	NA	0.721399
PSMB3	17	36908965	36920484	-	0.0221946	0.18603	0.709677	0.290323	0	2.04495	1.21979	NA	0.82516
DNAJB9	7	108210188	108215294	+	0.0222125	0.18603	0.645161	0.354839	0	0.501935	-0.290048	NA	0.791982
PIGG	4	492988	533710	+	0.0222178	0.18603	0.612903	0.387097	0	2.13555	0.989114	NA	1.14644
GAST	17	39868577	39872221	+	0.0223239	0.186709	0.709677	0.290323	0	4.11009	-0.122862	NA	4.23295
RAB8A	19	16222489	16244445	+	0.0225076	0.188034	0.645161	0.354839	0	0.350092	2.39526	NA	-2.04517
PSIP1	9	15464063	15511017	-	0.0225461	0.188145	0.516129	0.451613	0.0322581	2.30289	1.26955	2.11783	0.976792
ZNF467	7	149461270	149470568	-	0.0225796	0.188214	0.645161	0.354839	0	2.12537	0.862942	NA	1.26243
POP7	7	100303675	100305123	+	0.0226521	0.18827	0.645161	0.354839	0	0.898623	2.12964	NA	-1.23102
ZFAND5	9	74966340	74979508	-	0.0226594	0.18827	0.580645	0.387097	0.0322581	1.75426	0.926935	-0.518012	0.938475
NAA20	20	19997933	20014273	+	0.0226622	0.18827	0.709677	0.258065	0.0322581	2.05144	0.172764	-0.230219	1.92345
NAV3	12	78225068	78606792	+	0.0228903	0.189743	0.580645	0.419355	0	2.98312	0.83889	NA	2.14423
COMMD6	13	76099349	76112008	-	0.0230049	0.190481	0.580645	0.322581	0.0967742	0.913973	-0.462693	-1.95469	1.72097
OPRL1	20	62711434	62731996	+	0.0230982	0.190691	0.677419	0.322581	0	1.46164	0.0449327	NA	1.4167
PCDHGA5	5	140743897	140892546	+	0.0231092	0.190691	0.580645	0.419355	0	3.49182	1.18946	NA	2.30236
BOD1L1	4	13570365	13629328	-	0.0231124	0.190691	0.580645	0.419355	0	2.068	1.21424	NA	0.853758
SOS2	14	50583836	50698411	-	0.0231963	0.190691	0.612903	0.387097	0	1.79714	0.639229	NA	1.15791
TRIM9	14	51441978	51562422	-	0.0232087	0.190691	0.612903	0.387097	0	4.35564	1.77602	NA	2.57962
PHF2	9	96338908	96441869	+	0.0232339	0.190691	0.580645	0.387097	0.0322581	1.88043	0.978751	0.787474	0.916395
ABCC9	12	21950322	22089628	-	0.0232762	0.190691	0.516129	0.483871	0	3.24341	1.65838	NA	1.58503
UCKL1	20	62571181	62582527	-	0.0232861	0.190691	0.677419	0.322581	0	1.85537	1.13251	NA	0.722858
HDAC5	17	42154120	42201014	-	0.0233034	0.190691	0.709677	0.290323	0	2.31377	0.933	NA	1.38077
LNX2	13	28120049	28194720	-	0.0233124	0.190691	0.580645	0.322581	0.0967742	-0.807776	-0.0512732	-0.713974	-0.603572
RSPH1	21	43892595	43916464	-	0.0233271	0.190691	0.16129	0.741935	0.0967742	4.26712	1.65863	0.839804	2.70297
CHCHD6	3	126423062	126679249	+	0.0233654	0.190691	0.16129	0.806452	0.0322581	2.07762	0.724949	-0.194904	1.38805
PODXL	7	131185020	131241376	-	0.0233818	0.190691	0.645161	0.354839	0	-0.301365	1.78811	NA	-2.08947
LRPAP1	4	3505323	3533876	-	0.0233885	0.190691	0.612903	0.387097	0	1.83986	0.572675	NA	1.26718
ZNF655	7	99156044	99162328	+	0.023431	0.190828	0.645161	0.322581	0.0322581	1.51792	0.386094	1.09168	1.06768
COLQ	3	15491639	15540379	-	0.0235231	0.191354	0.16129	0.806452	0.0322581	4.04377	2.0371	2.36718	1.99397
GEMIN7	19	45579071	45594176	+	0.0235469	0.191354	0.677419	0.322581	0	2.23304	1.44147	NA	0.791576
CCDC107	9	35658286	35661500	+	0.0236221	0.191618	0.580645	0.387097	0.0322581	1.09657	0.234706	1.11394	0.79423
TOP3A	17	18174741	18218406	-	0.0236308	0.191618	0.516129	0.419355	0.0645161	1.99214	1.09211	1.40225	0.858683
RIMS4	20	43380444	43438979	-	0.023686	0.191857	0.677419	0.322581	0	4.37443	1.13201	NA	3.24242
TBC1D9	4	141541935	141677471	-	0.0237182	0.191909	0.612903	0.387097	0	2.81637	1.32343	NA	1.49293
KCNB1	20	47980413	48099181	-	0.0237935	0.192309	0.677419	0.322581	0	6.66275	3.11711	NA	3.54564
RPL36	19	5690271	5691678	+	0.0238286	0.192384	0.645161	0.354839	0	-0.346263	0.236637	NA	-0.5829
DYRK2	12	68042511	68056444	+	0.0238854	0.192424	0.612903	0.387097	0	0.688566	2.4364	NA	-1.74784
JAM2	21	27011593	27086885	+	0.0239347	0.192424	0.16129	0.741935	0.0967742	2.47872	1.24507	1.09319	1.25117
B3GNT8	19	41931263	41934635	-	0.0239645	0.192424	0.677419	0.322581	0	4.16771	2.35984	NA	1.80788
ZNF287	17	16450276	16472526	-	0.0239874	0.192424	0.516129	0.419355	0.0645161	2.727	1.70581	2.02636	0.978443
PCDHB7	5	140552201	140555957	+	0.0239919	0.192424	0.580645	0.419355	0	3.33936	1.38508	NA	1.95427
GRIN3A	9	104331633	104500862	-	0.0240453	0.192424	0.548387	0.387097	0.0645161	2.37621	0.8533	1.19879	1.47355
RAB3A	19	18307610	18314874	-	0.0240706	0.192424	0.645161	0.354839	0	4.60531	2.72245	NA	1.88285
PTPRT	20	40701391	41818557	+	0.0240909	0.192424	0.677419	0.322581	0	5.72942	2.39255	NA	3.33687
RDM1	17	34245083	34257303	-	0.0240916	0.192424	0.709677	0.290323	0	1.78736	0.202715	NA	1.58464
SNX10	7	26331514	26413949	+	0.0241706	0.192424	0.709677	0.290323	0	2.24538	1.00376	NA	1.24162
HIGD2A	5	175815526	175816772	+	0.0241836	0.192424	0.612903	0.387097	0	1.94874	1.27843	NA	0.670305
TTF1	9	135250934	135282238	-	0.024196	0.192424	0.612903	0.354839	0.0322581	1.40976	0.789713	0.229306	0.666744
ZNF396	18	32946660	32957301	-	0.0242052	0.192424	0.580645	0.354839	0.0645161	2.03248	0.8308	2.5956	0.930174
GATA2	3	128198264	128206764	-	0.0242162	0.192424	0.16129	0.806452	0.0322581	-2.20253	-0.191839	-0.862164	-1.98491
ZNF530	19	58111252	58121466	+	0.0242351	0.192424	0.645161	0.354839	0	2.5654	1.44323	NA	1.12217
CNTROB	17	7835441	7853237	+	0.0242467	0.192424	0.516129	0.419355	0.0645161	1.76925	1.20819	1.2074	0.561157
CMTM6	3	32522803	32544403	-	0.0243006	0.192573	0.16129	0.806452	0.0322581	1.01207	1.74403	0.81663	-0.696296
FAM188B	7	30811032	30932002	+	0.0243384	0.192573	0.645161	0.354839	0	2.06554	-0.162924	NA	2.22846
CSRP2BP	20	18118761	18169031	+	0.0243454	0.192573	0.709677	0.258065	0.0322581	1.8207	0.973118	0.703879	0.8775
ZXDC	3	126156443	126194762	-	0.0243688	0.192573	0.16129	0.806452	0.0322581	0.744636	0.266739	0.18723	0.480956
UNC79	14	93799564	94174222	+	0.024496	0.193317	0.612903	0.387097	0	3.65391	1.49375	NA	2.16015
ISCA1	9	88879460	88897490	-	0.0245148	0.193317	0.580645	0.387097	0.0322581	1.8226	1.08838	0.689286	0.764921
ADORA2B	17	15848230	15879210	+	0.0246161	0.193727	0.516129	0.419355	0.0645161	0.484775	-0.563477	-0.231673	1.00401
GDNF	5	37812778	37834924	-	0.0246188	0.193727	0.612903	0.387097	0	0.252731	2.41748	NA	-2.16475
CCDC57	17	80059345	80170689	-	0.0247031	0.194185	0.645161	0.354839	0	2.63189	1.44052	NA	1.19138
MYT1	20	62795826	62873606	+	0.0248766	0.195343	0.677419	0.322581	0	5.75532	3.58786	NA	2.16746
RRBP1	20	17594322	17662928	-	0.0250114	0.196087	0.709677	0.258065	0.0322581	-2.00794	-0.650797	-2.78927	-1.11954
ZNF133	20	18268926	18297640	+	0.025024	0.196087	0.709677	0.258065	0.0322581	1.82189	0.492233	0.295362	1.35153
PODXL2	3	127348001	127391653	+	0.0251054	0.196153	0.16129	0.806452	0.0322581	3.84988	2.55657	4.60191	1.21464
MYT1L	2	1792884	2328117	-	0.0251457	0.196153	0.16129	0.83871	0	3.55594	0.452881	NA	3.10306
CCM2L	20	30598244	30619984	+	0.025147	0.196153	0.709677	0.290323	0	3.68118	1.70671	NA	1.97447
DOK3	5	176928904	176937427	-	0.0251492	0.196153	0.612903	0.387097	0	2.65203	1.10735	NA	1.54469
INSM1	20	20348764	20351593	+	0.0252281	0.196153	0.709677	0.258065	0.0322581	5.8301	2.50902	5.28295	3.01286
SWSAP1	19	11485382	11487627	+	0.0252419	0.196153	0.645161	0.354839	0	2.56133	1.38195	NA	1.17937
RUNDC3B	7	87257728	87461613	+	0.0252692	0.196153	0.612903	0.387097	0	4.06029	2.26684	NA	1.79345
IRF2BPL	14	77490885	77495042	-	0.0252788	0.196153	0.612903	0.387097	0	1.72521	0.900184	NA	0.825028
EXOC1	4	56719815	56771244	+	0.0253107	0.196153	0.612903	0.387097	0	1.63988	0.972359	NA	0.667523
SYN2	3	12045833	12227232	+	0.0253299	0.196153	0.16129	0.806452	0.0322581	2.93213	1.80287	-2.2038	1.28337
SEC14L5	16	5008317	5069156	+	0.0253359	0.196153	0.16129	0.83871	0	3.93273	1.22834	NA	2.70439
ZNF428	19	44111375	44124014	-	0.0253482	0.196153	0.677419	0.322581	0	2.34579	1.2378	NA	1.10799
TTC25	17	40086875	40117669	+	0.0254822	0.196613	0.709677	0.290323	0	3.77694	1.26502	NA	2.51193
ACBD4	17	43209966	43221548	+	0.0254902	0.196613	0.645161	0.354839	0	1.05953	0.472372	NA	0.587157
TEN1	17	73975297	73996667	+	0.0254973	0.196613	0.677419	0.322581	0	2.5751	-2.34777	NA	4.92287
TMEM106B	7	12250847	12276890	+	0.0255133	0.196613	0.645161	0.354839	0	2.18064	0.545322	NA	1.63532
WNK4	17	40932648	40949084	+	0.0255459	0.196661	0.709677	0.290323	0	4.87333	2.11231	NA	2.76102
ZMYND19	9	140476530	140484937	-	0.0255912	0.196769	0.548387	0.419355	0.0322581	1.10278	0.559041	-0.314118	0.606112
C14orf132	14	96505660	96560308	+	0.0256127	0.196769	0.612903	0.387097	0	5.10476	3.17508	NA	1.92968
PCDHB12	5	140588290	140591698	+	0.0256466	0.196779	0.580645	0.419355	0	2.5631	0.761093	NA	1.80201
PCDHB4	5	140501331	140505205	+	0.0256723	0.196779	0.580645	0.419355	0	0.838509	-0.858438	NA	1.69695
CDK5RAP2	9	123151146	123342448	-	0.0257013	0.196779	0.645161	0.322581	0.0322581	1.46835	0.912212	0.0595815	0.633648
RCAN1	21	35888739	35986142	-	0.0257196	0.196779	0.16129	0.741935	0.0967742	0.196029	-1.06872	-2.32295	1.40946
CCDC151	19	11531271	11545980	-	0.025773	0.196985	0.645161	0.354839	0	5.00381	3.03086	NA	1.97295
CNTFR	9	34551429	34589735	-	0.0258947	0.197605	0.580645	0.387097	0.0322581	1.22302	-0.531721	-5.48846	2.13603
DDX42	17	61851548	61896677	+	0.0259071	0.197605	0.677419	0.322581	0	0.915169	0.314717	NA	0.600453
CLUH	17	2592679	2614927	-	0.0260362	0.198163	0.451613	0.483871	0.0645161	0.281314	-0.127174	-1.48641	0.568398
PCBP3	21	47269874	47362368	+	0.026058	0.198163	0.16129	0.741935	0.0967742	3.70851	2.48157	2.30541	1.24726
IQSEC3	12	176048	287626	+	0.02606	0.198163	0.548387	0.451613	0	6.43718	3.65449	NA	2.78269
TGFBI	5	135364583	135399507	+	0.0261029	0.198208	0.612903	0.387097	0	3.31272	1.78756	NA	1.52516
SHKBP1	19	41082756	41097305	+	0.0261192	0.198208	0.677419	0.322581	0	1.72657	0.664872	NA	1.0617
IZUMO4	19	2096867	2099583	+	0.0261519	0.198254	0.612903	0.387097	0	0.0953645	-0.660565	NA	0.755929
RUSC2	9	35489829	35561895	+	0.0261804	0.198269	0.580645	0.387097	0.0322581	1.52534	0.909411	-0.228638	0.70347
ENTPD6	20	25176305	25208711	+	0.0262392	0.198513	0.677419	0.290323	0.0322581	1.16049	0.106163	-1.49153	1.2141
FHDC1	4	153864134	153900848	+	0.0263625	0.199111	0.516129	0.483871	0	3.95938	2.55166	NA	1.40773
KIF3A	5	132028318	132073270	-	0.0263718	0.199111	0.612903	0.387097	0	3.88475	2.37607	NA	1.50868
TCTN1	12	111051831	111068062	+	0.0264333	0.199196	0.580645	0.419355	0	3.03635	1.52839	NA	1.50796
ZNF584	19	58920040	58929694	+	0.0264365	0.199196	0.645161	0.354839	0	1.98819	0.598561	NA	1.38963
VSIG10	12	118501397	118541810	-	0.0264852	0.199361	0.580645	0.419355	0	0.633089	1.35292	NA	-0.719835
C12orf10	12	53693469	53700965	+	0.0265459	0.199617	0.645161	0.354839	0	1.62054	0.86278	NA	0.757755
MOB3B	9	27325206	27529850	-	0.026634	0.19996	0.548387	0.387097	0.0645161	1.03516	-0.174013	0.363568	1.13238
TTLL3	3	9851643	9878040	+	0.0266453	0.19996	0.16129	0.806452	0.0322581	2.01305	1.33987	-0.290535	0.735895
DHX35	20	37590980	37668366	+	0.0267039	0.200013	0.677419	0.322581	0	2.26063	1.14067	NA	1.11996
PDK2	17	48172100	48188733	+	0.026706	0.200013	0.709677	0.290323	0	-0.414041	0.324414	NA	-0.738455
NAIF1	9	130823511	130829599	-	0.0267432	0.200024	0.580645	0.387097	0.0322581	1.61362	0.910622	1.24328	0.67741
TMEM176A	7	150497853	150502208	+	0.0267612	0.200024	0.645161	0.354839	0	4.98851	3.56318	NA	1.42533
EPB41L3	18	5392274	5544338	-	0.0268871	0.200764	0.483871	0.451613	0.0645161	3.1025	1.42242	4.35423	1.31361
C7orf31	7	25174315	25219817	-	0.0269268	0.20086	0.709677	0.290323	0	2.29516	0.767957	NA	1.5272
MAN2B1	19	12757321	12777591	-	0.0271472	0.202301	0.645161	0.354839	0	-0.106769	0.565596	NA	-0.672364
SMARCA2	9	2015218	2193624	+	0.0272004	0.202366	0.548387	0.419355	0.0322581	1.76678	0.811667	2.17268	0.857897
DFNB31	9	117164359	117267730	-	0.0272103	0.202366	0.548387	0.419355	0.0322581	2.18537	1.26037	0.653781	0.96833
ATP10D	4	47487409	47595503	+	0.0272924	0.202687	0.612903	0.387097	0	2.29228	1.0744	NA	1.21789
UBN2	7	138916230	138992982	+	0.0273078	0.202687	0.645161	0.354839	0	1.84288	0.903871	NA	0.939007
HDHD2	18	44633772	44676891	-	0.0274053	0.203122	0.548387	0.387097	0.0645161	1.51677	0.663819	1.47771	0.73668
PCSK1	5	95726039	95767863	-	0.0274413	0.203122	0.612903	0.387097	0	5.5292	2.61934	NA	2.90986
MCM3AP	21	47655038	47705308	-	0.0274482	0.203122	0.16129	0.741935	0.0967742	1.58497	0.967352	1.13304	0.598505
ECE2	3	183967444	183976547	+	0.0274889	0.203177	0.16129	0.774194	0.0645161	0.446697	-1.07505	-2.0047	1.59326
IL17D	13	21277481	21297237	+	0.0275101	0.203177	0.580645	0.322581	0.0967742	1.93244	1.08477	0.0600398	1.08415
MAST4	5	65892175	66282351	+	0.0277106	0.204146	0.580645	0.419355	0	2.31893	1.20728	NA	1.11164
POLN	4	2073684	2243891	-	0.0277345	0.204146	0.580645	0.419355	0	1.57051	0.568498	NA	1.00201
CASD1	7	94139169	94186331	+	0.0277572	0.204146	0.645161	0.354839	0	1.96776	0.846064	NA	1.12169
TBL2	7	72983273	72993013	-	0.0277705	0.204146	0.645161	0.354839	0	0.718356	0.282562	NA	0.435793
ZFP14	19	36825354	36870105	-	0.0277935	0.204146	0.677419	0.322581	0	2.4349	1.31018	NA	1.12473
PCED1A	20	2815959	2821348	-	0.0278778	0.204146	0.709677	0.258065	0.0322581	2.06444	1.16727	0.250942	0.998983
FBXL7	5	15500304	15939905	+	0.0279027	0.204146	0.612903	0.387097	0	3.60434	1.73355	NA	1.87078
PIPOX	17	27369917	27384236	+	0.0279121	0.204146	0.709677	0.258065	0.0322581	4.84034	2.69119	0.688054	2.37172
CHMP1B	18	11851388	11854448	+	0.0279401	0.204146	0.548387	0.387097	0.0645161	1.95972	0.839219	1.51618	1.02379
MAPKAP1	9	128199672	128469513	-	0.0279724	0.204146	0.612903	0.354839	0.0322581	0.605814	0.0805644	-0.349271	0.561069
ARPC5L	9	127624396	127640012	+	0.0279867	0.204146	0.612903	0.354839	0.0322581	1.62891	0.741758	0.319949	0.922304
PSMB7	9	127115743	127177752	+	0.0280338	0.204146	0.645161	0.322581	0.0322581	1.58342	0.635263	-0.0400267	1.00955
SEZ6	17	27281922	27333081	-	0.0280866	0.204146	0.709677	0.258065	0.0322581	7.45588	3.63633	-3.79579	4.64534
NUP107	12	69080730	69139594	+	0.0280886	0.204146	0.645161	0.354839	0	1.49931	0.829214	NA	0.670099
AGAP2	12	58118075	58132029	-	0.0280956	0.204146	0.612903	0.387097	0	0.280088	2.23377	NA	-1.95369
TRAF2	9	139780964	139821067	+	0.0281063	0.204146	0.580645	0.387097	0.0322581	1.7986	1.02375	0.597665	0.807622
AP3D1	19	2100986	2151556	-	0.0281071	0.204146	0.612903	0.387097	0	1.14946	0.655068	NA	0.494395
ACOX3	4	8368008	8442452	-	0.0282521	0.204741	0.580645	0.419355	0	0.0729179	-0.332857	NA	0.405775
GABBR2	9	101050363	101471479	-	0.0282526	0.204741	0.548387	0.387097	0.0645161	3.38302	0.960343	1.92076	2.28548
RRP1	21	45209417	45223983	+	0.0282713	0.204741	0.16129	0.741935	0.0967742	1.10846	0.292085	-0.512132	0.909164
CCDC110	4	186366335	186392913	-	0.0283046	0.204783	0.548387	0.451613	0	-1.63282	-2.69976	NA	1.06694
C9orf40	9	77561498	77567802	-	0.0284318	0.204945	0.580645	0.387097	0.0322581	1.91112	0.891123	1.76163	0.953039
LRFN3	19	36428021	36436097	+	0.0284393	0.204945	0.677419	0.322581	0	2.22776	1.13131	NA	1.09645
ALOX12B	17	7975953	7991021	-	0.0284422	0.204945	0.516129	0.419355	0.0645161	3.21117	1.74775	0.685201	1.60509
ACACB	12	109577201	109706031	+	0.0284611	0.204945	0.516129	0.483871	0	0.880733	-0.150543	NA	1.03128
TCFL5	20	61472365	61493115	-	0.0284646	0.204945	0.677419	0.322581	0	1.64699	0.481756	NA	1.16524
EXOG	3	38537762	38567796	+	0.0286005	0.20517	0.16129	0.806452	0.0322581	4.43955	1.8464	1.23271	2.61676
GPSM1	9	139221931	139236288	+	0.0286066	0.20517	0.580645	0.387097	0.0322581	0.582197	-0.188853	-2.32671	0.935501
TMEM119	12	108983621	108991894	-	0.028619	0.20517	0.516129	0.483871	0	3.17456	0.977612	NA	2.19695
C4orf32	4	113066552	113110237	+	0.0286284	0.20517	0.580645	0.419355	0	2.44714	1.17144	NA	1.2757
EBF4	20	2673523	2740754	+	0.0288201	0.20588	0.709677	0.258065	0.0322581	2.75539	1.26004	1.6097	1.4565
C17orf96	17	36827958	36831187	-	0.0288794	0.20588	0.709677	0.290323	0	0.235665	-1.09289	NA	1.32856
TEX10	9	103064356	103114853	-	0.0288797	0.20588	0.516129	0.419355	0.0645161	1.54188	0.955703	0.0242983	0.71036
ZNF474	5	121465207	121489266	+	0.0289031	0.20588	0.612903	0.387097	0	2.41104	0.620736	NA	1.79031
USP6	17	5019732	5078327	+	0.0289119	0.20588	0.483871	0.451613	0.0645161	2.88686	1.63342	-0.542483	1.52543
NXT1	20	23331372	23335408	+	0.0289136	0.20588	0.709677	0.258065	0.0322581	1.66124	0.602097	0.280639	1.09486
TLDC2	20	35504523	35522638	+	0.0289354	0.20588	0.677419	0.322581	0	3.8327	1.9241	NA	1.90861
EPOR	19	11487880	11495018	-	0.029014	0.20588	0.645161	0.354839	0	2.49794	1.33295	NA	1.16499
RUFY3	4	71570653	71655614	+	0.029066	0.20588	0.612903	0.387097	0	3.07445	1.55138	NA	1.52307
BTBD11	12	107712196	108053419	+	0.029088	0.20588	0.516129	0.483871	0	5.01599	2.72043	NA	2.29557
ZSCAN21	7	99647416	99662663	+	0.029089	0.20588	0.645161	0.322581	0.0322581	1.53078	0.963772	0.704533	0.590574
TMEM179	14	105057200	105071097	-	0.0290949	0.20588	0.612903	0.387097	0	5.72976	2.63699	NA	3.09278
GPR135	14	59930239	59932059	-	0.0291084	0.20588	0.612903	0.387097	0	2.59998	1.05185	NA	1.54812
DYNC1I1	7	95401817	95727736	+	0.0291427	0.20588	0.645161	0.354839	0	5.1763	2.30941	NA	2.86689
EEF1A2	20	62119364	62130668	-	0.029147	0.20588	0.677419	0.322581	0	5.29821	2.23864	NA	3.05957
PCSK4	19	1481426	1490449	-	0.0292836	0.206461	0.612903	0.387097	0	1.46764	0.600724	NA	0.866916
GDA	9	74729510	74867140	+	0.0293091	0.206461	0.580645	0.387097	0.0322581	2.3062	-0.10211	1.70146	2.26957
TMEM171	5	72416387	72427644	+	0.0293123	0.206461	0.645161	0.354839	0	-0.521699	1.754	NA	-2.2757
HDAC9	7	18126564	19042039	+	0.0295628	0.207371	0.645161	0.354839	0	3.54926	2.30539	NA	1.24387
NCOA5	20	44689623	44718580	-	0.0295862	0.207371	0.677419	0.322581	0	1.73715	0.886987	NA	0.850167
HS6ST3	13	96743092	97491816	+	0.0296359	0.207371	0.580645	0.322581	0.0967742	2.40803	-0.069541	-0.791056	2.64408
NYAP1	7	100081549	100092425	+	0.0296855	0.207371	0.645161	0.354839	0	5.01584	3.04703	NA	1.96881
ELF2	4	139978411	140098372	-	0.0297212	0.207371	0.612903	0.387097	0	-0.217823	0.552472	NA	-0.770295
TOP1	20	39657457	39753127	+	0.0298076	0.207371	0.677419	0.322581	0	1.62977	0.683511	NA	0.946264
ERCC2	19	45854648	45873845	-	0.0298311	0.207371	0.677419	0.322581	0	1.94877	1.28717	NA	0.661596
DHRS11	17	34948225	34957233	+	0.0299198	0.207371	0.709677	0.290323	0	0.818442	0.183312	NA	0.63513
ZNF566	19	36936020	36980337	-	0.0299627	0.207371	0.677419	0.322581	0	2.40192	1.37669	NA	1.02523
ZNF114	19	48773355	48790865	+	0.0299904	0.207371	0.677419	0.322581	0	-0.782705	1.12262	NA	-1.90532
MGAT4C	12	86373036	87232681	-	0.0300023	0.207371	0.580645	0.387097	0.0322581	3.1323	0.786071	4.57791	2.05455
ANGEL1	14	77253585	77279283	-	0.0300956	0.207371	0.612903	0.387097	0	1.14971	0.304743	NA	0.844963
SENP1	12	48436680	48499775	-	0.0301454	0.207371	0.645161	0.354839	0	1.86208	1.05699	NA	0.805099
TXNDC17	17	6544221	6547861	+	0.0301526	0.207371	0.483871	0.451613	0.0645161	-0.451509	0.61673	2.32663	-1.28198
NLGN2	17	7311501	7323183	+	0.0301592	0.207371	0.483871	0.451613	0.0645161	3.3408	1.7356	2.94372	1.45418
RFX3	9	3218296	3526001	-	0.0302121	0.207371	0.548387	0.419355	0.0322581	3.02508	1.64123	3.74971	1.23324
CDKN2D	19	10677137	10679631	-	0.0302161	0.207371	0.645161	0.354839	0	3.31782	1.9849	NA	1.33293
STMN3	20	62271057	62284119	-	0.0302198	0.207371	0.677419	0.322581	0	3.93435	2.28204	NA	1.65231
MED24	17	38175349	38210889	-	0.030255	0.207371	0.677419	0.322581	0	1.79112	1.17674	NA	0.61438
TFCP2	12	51487538	51566926	-	0.0302804	0.207371	0.645161	0.354839	0	1.76262	0.413461	NA	1.34916
MPP3	17	41878166	41910547	-	0.030318	0.207371	0.709677	0.290323	0	1.18577	-0.0903144	NA	1.27609
CYP4F12	19	15783827	15807984	+	0.0303196	0.207371	0.612903	0.387097	0	2.94685	1.26521	NA	1.68163
MED26	19	16685717	16739015	-	0.0303226	0.207371	0.645161	0.354839	0	1.3411	0.769703	NA	0.571399
PROSER1	13	39584001	39612213	-	0.0303355	0.207371	0.580645	0.322581	0.0967742	0.946741	0.425088	-0.17539	0.660225
MAX	14	65472818	65569262	-	0.0303593	0.207371	0.612903	0.387097	0	2.08747	1.18051	NA	0.906957
SFRP4	7	37945533	37956525	-	0.0304073	0.207371	0.645161	0.354839	0	3.18931	-0.954295	NA	4.14361
PPP4R4	14	94640648	94694183	+	0.0304105	0.207371	0.612903	0.387097	0	5.01662	2.96635	NA	2.05027
MMP28	17	34083267	34122711	-	0.0304593	0.207371	0.709677	0.290323	0	3.35097	0.70558	NA	2.64539
ANKS1B	12	99128568	100378432	-	0.0304732	0.207371	0.580645	0.419355	0	3.528	1.56524	NA	1.96276
VPS25	17	40925453	40931618	+	0.0304741	0.207371	0.709677	0.290323	0	0.120592	1.7316	NA	-1.61101
ARG2	14	68086578	68118437	+	0.0304864	0.207371	0.612903	0.387097	0	2.5238	1.1145	NA	1.40931
GRPEL1	4	7060621	7069937	-	0.0304913	0.207371	0.580645	0.419355	0	1.50405	0.879179	NA	0.62487
HSPH1	13	31709110	31736158	-	0.0305785	0.207371	0.580645	0.322581	0.0967742	2.68478	1.85048	0.718907	1.09543
AUTS2	7	69063904	69755772	+	0.030613	0.207371	0.645161	0.354839	0	2.2358	1.07774	NA	1.15805
PXN	12	120648241	120687964	-	0.0306136	0.207371	0.580645	0.419355	0	1.89584	0.778815	NA	1.11702
CDC16	13	115000319	115038198	+	0.0306379	0.207371	0.580645	0.322581	0.0967742	1.08983	0.878889	-0.432916	0.513665
TMTC1	12	29653745	29936743	-	0.030655	0.207371	0.580645	0.419355	0	3.1409	1.4194	NA	1.72151
RRP1B	21	45079431	45115960	+	0.0306598	0.207371	0.16129	0.741935	0.0967742	1.08438	0.266181	-0.279131	0.881122
FN3K	17	80693451	80709073	+	0.030674	0.207371	0.645161	0.354839	0	1.62993	0.5967	NA	1.03323
SPAG8	9	35807781	35812259	-	0.0306863	0.207371	0.580645	0.387097	0.0322581	2.22308	0.935243	0.205367	1.34398
LOX	5	121398889	121412869	-	0.0306958	0.207371	0.612903	0.387097	0	2.95254	0.965968	NA	1.98658
FAM171A2	17	42431100	42441235	-	0.0307278	0.207371	0.709677	0.290323	0	5.0733	2.58425	NA	2.48905
N6AMT2	13	21302869	21348097	-	0.030751	0.207371	0.580645	0.322581	0.0967742	1.51132	0.360814	0.439531	1.13234
NUAK1	12	106457124	106533811	-	0.0307623	0.207371	0.516129	0.483871	0	3.47541	2.29851	NA	1.1769
ASB6	9	132396882	132404448	-	0.0307773	0.207371	0.580645	0.387097	0.0322581	1.36632	0.467453	-0.0517348	0.938802
ADAM21	14	70918873	70926622	+	0.0308482	0.20765	0.612903	0.387097	0	1.24731	-0.28869	NA	1.536
SOGA1	20	35405844	35488276	-	0.0308897	0.20765	0.677419	0.322581	0	3.26639	1.25378	NA	2.01261
CDK5RAP1	20	31946644	31989375	-	0.0309023	0.20765	0.709677	0.290323	0	1.6527	0.792883	NA	0.859817
CNOT4	7	135046546	135194875	-	0.0309355	0.207686	0.645161	0.354839	0	1.67149	1.06767	NA	0.603817
SFSWAP	12	132195631	132284283	+	0.0309902	0.207819	0.580645	0.419355	0	1.73596	1.08552	NA	0.650443
NDUFAF2	5	60240955	60448864	+	0.0310296	0.207819	0.580645	0.419355	0	0.941036	0.272282	NA	0.668754
MSX2	5	174151574	174157902	+	0.031039	0.207819	0.612903	0.387097	0	-0.550663	1.764	NA	-2.31467
MAST1	19	12949258	12985766	+	0.0311241	0.208202	0.645161	0.354839	0	4.56657	2.93176	NA	1.63481
CUL4A	13	113862506	113919392	+	0.0312559	0.208818	0.580645	0.322581	0.0967742	1.53422	0.579921	0.86132	0.889362
SMC2	9	106856540	106903700	+	0.0313301	0.208818	0.516129	0.419355	0.0645161	2.25426	1.63128	1.30649	0.666288
TMEM252	9	71151495	71155783	-	0.0313313	0.208818	0.580645	0.387097	0.0322581	1.50382	-0.17362	1.80956	1.52489
ZNF786	7	148766732	148787869	-	0.0313425	0.208818	0.645161	0.354839	0	2.29728	1.31527	NA	0.982014
TMEM132B	12	125811161	126146923	+	0.0313713	0.208818	0.580645	0.419355	0	4.69911	1.52796	NA	3.17115
SS18	18	23596216	23670611	-	0.0313912	0.208818	0.580645	0.354839	0.0645161	1.92768	1.14436	1.68258	0.700519
ANKRD18A	9	38571360	38620657	-	0.0314243	0.208818	0.580645	0.387097	0.0322581	1.33059	0.305831	-1.22578	1.14258
PSEN1	14	73603142	73690399	+	0.0314404	0.208818	0.612903	0.387097	0	1.16734	0.159636	NA	1.0077
BRAT1	7	2577443	2595392	-	0.0315018	0.208837	0.645161	0.354839	0	1.46372	0.842016	NA	0.6217
PHOSPHO1	17	47300731	47308128	-	0.0315039	0.208837	0.709677	0.290323	0	2.20082	0.290068	NA	1.91075
TOMM40	19	45394476	45406946	+	0.0315405	0.208837	0.677419	0.322581	0	1.99421	0.23431	NA	1.75991
UBE2H	7	129470571	129592783	-	0.0315553	0.208837	0.645161	0.354839	0	0.814934	-0.469069	NA	1.284
MAD1L1	7	1855427	2272583	-	0.03163	0.209024	0.645161	0.354839	0	1.47069	2.63703	NA	-1.16633
ZSWIM1	20	44509847	44513905	+	0.0316397	0.209024	0.677419	0.322581	0	2.05024	1.26171	NA	0.788537
DPP6	7	153584181	154686000	+	0.031699	0.20923	0.645161	0.354839	0	4.63799	2.01178	NA	2.62621
NR2F1	5	92919042	92930317	+	0.0318216	0.20979	0.612903	0.354839	0.0322581	2.03813	0.81639	-2.30692	1.48202
CATSPERG	19	38826426	38861589	+	0.0318402	0.20979	0.677419	0.322581	0	2.1235	0.713224	NA	1.41028
BAZ1B	7	72854727	72936615	-	0.0320298	0.210394	0.645161	0.354839	0	2.06526	1.13955	NA	0.925702
TRHDE	12	72666528	73059422	+	0.0320375	0.210394	0.580645	0.419355	0	-6.97556	-4.83007	NA	-2.14549
GIPR	19	46171501	46186982	+	0.0320915	0.210394	0.677419	0.322581	0	4.54262	1.77937	NA	2.76325
LMAN2	5	176758562	176778885	-	0.0321369	0.210394	0.612903	0.387097	0	0.934945	0.426123	NA	0.508822
TCAP	17	37821598	37822807	+	0.0321571	0.210394	0.677419	0.322581	0	5.37427	2.39123	NA	2.98305
ITGA9	3	37493812	37861281	+	0.0321853	0.210394	0.16129	0.806452	0.0322581	1.9205	3.09498	0.357382	-1.06919
RAP1B	12	69004618	69054385	+	0.0321859	0.210394	0.645161	0.354839	0	1.4335	-0.113409	NA	1.54691
MAEA	4	1283638	1333936	+	0.032363	0.211175	0.645161	0.354839	0	1.89859	0.7027	NA	1.19589
SCN8A	12	51985019	52206648	+	0.0323781	0.211175	0.645161	0.354839	0	2.22127	0.625723	NA	1.59554
NEK1	4	170314420	170533778	-	0.0323904	0.211175	0.516129	0.483871	0	2.08001	0.925363	NA	1.15464
ACTR10	14	58666832	58702354	+	0.0324596	0.211295	0.612903	0.387097	0	1.78476	1.14444	NA	0.640326
ZNF780A	19	40575058	40596845	-	0.0324754	0.211295	0.677419	0.322581	0	2.24229	1.45179	NA	0.790495
VCAN	5	82767492	82878122	+	0.0325655	0.211295	0.645161	0.354839	0	4.01012	1.81519	NA	2.19493
KCNK10	14	88646451	88737255	-	0.0325724	0.211295	0.612903	0.387097	0	-0.494843	-2.18656	NA	1.69171
ADAMTS13	9	136279458	136324525	+	0.0326191	0.211295	0.612903	0.354839	0.0322581	2.44805	1.72249	-1.78954	1.01823
ZBED3	5	76372501	76383071	-	0.0326191	0.211295	0.645161	0.354839	0	1.3495	0.0421059	NA	1.30739
ST8SIA4	5	100142638	100238989	-	0.0326312	0.211295	0.612903	0.387097	0	3.78672	2.17466	NA	1.61207
ENTPD2	9	139942549	139948503	-	0.0326595	0.211295	0.580645	0.387097	0.0322581	4.12016	2.15144	2.11495	1.97152
RUNX1	21	36160097	36260987	-	0.0326645	0.211295	0.16129	0.741935	0.0967742	3.81886	2.19829	0.324465	1.83678
APP	21	27252860	27512708	-	0.0326924	0.211295	0.16129	0.741935	0.0967742	1.67729	0.885151	1.28972	0.745461
PARP11	12	3918026	3982614	-	0.0327682	0.211602	0.548387	0.451613	0	1.5775	0.754288	NA	0.823209
SPTLC2	14	77972339	78083110	-	0.0328135	0.211711	0.612903	0.387097	0	2.30122	1.35178	NA	0.949433
ZSCAN22	19	58838384	58853712	+	0.0328571	0.211809	0.645161	0.354839	0	2.22139	0.701458	NA	1.51994
KCNH6	17	61600694	61624089	+	0.0329241	0.212057	0.677419	0.322581	0	6.88585	3.55348	NA	3.33237
P4HB	17	79801033	79818544	-	0.0329934	0.21232	0.645161	0.354839	0	-2.0752	-0.461288	NA	-1.61391
CDHR3	7	105603656	105676877	+	0.0330293	0.212368	0.645161	0.354839	0	4.28948	2.37896	NA	1.91052
KCNJ6	21	38996524	39288741	-	0.0330907	0.212423	0.16129	0.741935	0.0967742	5.87126	3.86116	6.53153	1.70198
ADAM19	5	156904311	157002831	-	0.0330949	0.212423	0.580645	0.387097	0.0322581	3.56491	2.07927	3.30569	1.3913
PREX1	20	47240792	47444420	+	0.0331392	0.212524	0.677419	0.322581	0	2.99505	1.35422	NA	1.64083
RASL10B	17	34058678	34070540	+	0.0331792	0.212549	0.709677	0.290323	0	1.54368	-0.118378	NA	1.66206
PGAM5	12	133287392	133295752	+	0.0332	0.212549	0.580645	0.419355	0	-0.243076	1.09793	NA	-1.341
CBFA2T2	20	32077927	32237837	+	0.0332443	0.21265	0.709677	0.290323	0	2.18879	0.72926	NA	1.45953
NUBPL	14	32030590	32330430	+	0.0332799	0.212695	0.612903	0.387097	0	1.33426	0.590239	NA	0.744021
ATP6V0A1	17	40610861	40674597	+	0.0333088	0.212697	0.709677	0.290323	0	3.73835	2.14666	NA	1.59169
SCO1	17	10583648	10600885	-	0.0333863	0.213009	0.516129	0.419355	0.0645161	1.91053	1.05226	-3.07469	1.40853
GALR1	18	74962007	74982098	+	0.0334509	0.213117	0.516129	0.419355	0.0645161	2.85819	1.13576	-0.672986	1.9636
TIGD4	4	153690505	153700916	-	0.0334604	0.213117	0.516129	0.483871	0	2.66675	1.35864	NA	1.30811
DMRTA1	9	22446839	22452472	+	0.0334897	0.213122	0.516129	0.419355	0.0645161	-2.88511	-1.30779	-1.42071	-1.56226
CKAP2	13	53029494	53039978	+	0.0335483	0.213249	0.580645	0.322581	0.0967742	3.47379	2.47012	2.78654	0.930654
SPTBN4	19	40973125	41082365	+	0.033567	0.213249	0.677419	0.322581	0	5.13542	2.40518	NA	2.73024
EFNB3	17	7608519	7614693	+	0.0337787	0.213979	0.483871	0.451613	0.0645161	5.68139	3.99858	3.14566	1.78943
SEMA3E	7	82993221	83270747	-	0.0337798	0.213979	0.645161	0.354839	0	5.30837	2.37629	NA	2.93207
ACSL6	5	131285665	131347355	-	0.0338048	0.213979	0.612903	0.387097	0	3.77217	2.25728	NA	1.51489
TMEM60	7	77423044	77427747	-	0.0338241	0.213979	0.645161	0.354839	0	2.18955	1.19797	NA	0.991586
YKT6	7	44240577	44253893	+	0.0338263	0.213979	0.645161	0.354839	0	0.452477	-0.881539	NA	1.33402
PARP8	5	49961732	50142356	+	0.033891	0.213979	0.580645	0.419355	0	1.76946	0.776974	NA	0.992485
SMYD4	17	1682828	1733175	-	0.0339265	0.213979	0.483871	0.451613	0.0645161	1.07368	0.5831	-2.01793	0.815711
FITM2	20	42931477	42939892	-	0.0339404	0.213979	0.677419	0.322581	0	1.65326	0.72874	NA	0.924523
CPZ	4	8594386	8621488	+	0.0339693	0.213981	0.580645	0.419355	0	4.29357	1.88151	NA	2.41206
IER5L	9	131937830	131940540	-	0.0339999	0.213992	0.580645	0.387097	0.0322581	3.44974	2.55908	-0.367895	1.11581
ZNF14	19	19821280	19843921	-	0.0341165	0.214545	0.677419	0.322581	0	1.71799	0.871156	NA	0.846831
TP53RK	20	45313003	45318276	-	0.0341964	0.214775	0.677419	0.322581	0	1.69205	0.808018	NA	0.88403
ZNF282	7	148892553	148923339	+	0.0342106	0.214775	0.645161	0.354839	0	0.0966965	0.961262	NA	-0.864566
RABEPK	9	127962820	127996438	+	0.0343835	0.215536	0.612903	0.354839	0.0322581	1.39853	0.718405	-0.819733	0.808307
NRCAM	7	107788070	108096841	-	0.0343898	0.215536	0.645161	0.354839	0	1.87367	0.212862	NA	1.66081
LMBR1L	12	49490921	49504683	-	0.0344438	0.215641	0.645161	0.354839	0	2.42645	1.70414	NA	0.72231
PTRF	17	40554466	40575338	-	0.0344779	0.215641	0.709677	0.290323	0	2.26903	0.319062	NA	1.94997
STK4	20	43595114	43708618	+	0.0344934	0.215641	0.677419	0.322581	0	2.28273	0.992834	NA	1.2899
GALC	14	88399357	88459615	-	0.0345499	0.215702	0.612903	0.387097	0	2.01722	0.75358	NA	1.26364
CPE	4	166300093	166419699	+	0.0345713	0.215702	0.516129	0.483871	0	5.16205	2.88958	NA	2.27247
ZNF510	9	99516830	99540348	-	0.0346178	0.215702	0.548387	0.387097	0.0645161	1.81506	1.07494	1.16822	0.726795
RAB14	9	123940414	123964365	-	0.0346384	0.215702	0.645161	0.322581	0.0322581	1.87841	1.15658	0.979358	0.737947
CBR4	4	169908740	169931468	-	0.0346478	0.215702	0.516129	0.483871	0	2.11895	1.35197	NA	0.766981
ABL1	9	133589267	133763062	+	0.0347344	0.215833	0.612903	0.354839	0.0322581	1.26839	0.0760382	-0.867007	1.27094
CCDC183	9	139690789	139702193	+	0.0347352	0.215833	0.580645	0.387097	0.0322581	2.21855	1.05265	0.883136	1.17893
SARS2	19	39405903	39421536	-	0.0348019	0.215833	0.677419	0.322581	0	0.975452	0.296639	NA	0.678812
SPPL3	12	121200312	121342155	-	0.0348115	0.215833	0.580645	0.419355	0	1.67093	1.01993	NA	0.651006
INCA1	17	4891424	4900905	-	0.0348486	0.215833	0.483871	0.451613	0.0645161	2.60622	1.71213	0.95047	0.989297
SHFM1	7	96135934	96339203	-	0.0348629	0.215833	0.645161	0.354839	0	1.73201	0.821741	NA	0.910273
SMARCD2	17	61909440	61916088	-	0.0349205	0.215833	0.677419	0.322581	0	0.00281781	0.877233	NA	-0.874415
PRPF6	20	62612430	62664453	-	0.0349382	0.215833	0.677419	0.322581	0	1.29259	0.718811	NA	0.573778
SYNJ1	21	34001068	34100250	-	0.0349577	0.215833	0.16129	0.741935	0.0967742	3.91556	1.69542	2.70312	2.10387
CCDC132	7	92861652	92990435	+	0.0349664	0.215833	0.645161	0.354839	0	1.56731	0.749367	NA	0.817944
CC2D1A	19	14016955	14041693	+	0.0349873	0.215833	0.645161	0.354839	0	1.15203	0.603842	NA	0.54819
PCYOX1L	5	148737569	148749221	+	0.0350218	0.215867	0.580645	0.419355	0	2.67198	1.29386	NA	1.37811
EIF2B1	12	124105569	124118323	-	0.0351195	0.21604	0.580645	0.419355	0	1.43642	0.986296	NA	0.450122
PPP2R1A	19	52693054	52729678	-	0.0351485	0.21604	0.677419	0.322581	0	2.14917	0.94299	NA	1.20618
STEAP2	7	89840999	89866992	+	0.0351758	0.21604	0.645161	0.354839	0	1.61362	0.135533	NA	1.47809
TSC22D1	13	45006278	45150701	-	0.0351958	0.21604	0.580645	0.322581	0.0967742	2.13131	1.20244	0.185218	1.16362
PRRT3	3	9987225	9994099	-	0.0352071	0.21604	0.16129	0.806452	0.0322581	3.63555	2.11938	2.93287	1.48488
AFF4	5	132211070	132299354	-	0.0352413	0.21604	0.612903	0.387097	0	1.66092	0.689544	NA	0.971376
LSM4	19	18417039	18434001	-	0.0352529	0.21604	0.645161	0.354839	0	-0.099014	1.43635	NA	-1.53536
RGS14	5	176784843	176799599	+	0.0353812	0.216648	0.612903	0.387097	0	0.903564	1.87841	NA	-0.974851
SNX24	5	122181159	122344902	+	0.0354378	0.216816	0.612903	0.387097	0	1.25817	0.496465	NA	0.761706
BBS7	4	122745483	122791652	-	0.0354828	0.216861	0.580645	0.419355	0	2.45055	1.41318	NA	1.03737
PYCR1	17	79890259	79895115	+	0.0355033	0.216861	0.645161	0.354839	0	-2.49853	-0.736507	NA	-1.76202
ARHGEF28	5	72921982	73237818	+	0.0355472	0.216951	0.645161	0.354839	0	0.501192	-0.804018	NA	1.30521
SUOX	12	56391042	56399309	+	0.0356299	0.217268	0.580645	0.419355	0	2.5677	1.00734	NA	1.56036
ELP5	17	7155371	7163259	+	0.0356574	0.217268	0.483871	0.451613	0.0645161	1.88319	0.98075	1.35213	0.856018
PDLIM4	5	131593350	131609147	+	0.0357661	0.217752	0.612903	0.387097	0	2.76869	0.653159	NA	2.11553
WBSCR22	7	73097897	73112551	+	0.0358789	0.218259	0.645161	0.354839	0	2.10214	1.14834	NA	0.953803
FUZ	19	50310122	50316567	-	0.0359078	0.218259	0.677419	0.322581	0	1.5513	0.796778	NA	0.754527
L3MBTL1	20	42136319	42170535	+	0.0359788	0.218469	0.677419	0.322581	0	2.69581	1.21582	NA	1.48
SMIM2	13	44717286	44735393	-	0.0360361	0.218469	0.580645	0.322581	0.0967742	1.41305	-1.11921	2.0547	1.79982
RDH13	19	55555691	55574585	-	0.0360893	0.218469	0.677419	0.322581	0	1.11339	0.160028	NA	0.953359
TBC1D30	12	65153276	65274802	+	0.0361134	0.218469	0.580645	0.419355	0	-1.09044	-0.221278	NA	-0.869159
DTX2	7	76090971	76135312	+	0.0361217	0.218469	0.645161	0.354839	0	0.542505	1.227	NA	-0.684499
PCDHA1	5	140165720	140391929	+	0.0361614	0.218469	0.580645	0.419355	0	3.40032	1.29249	NA	2.10782
ANKEF1	20	10015646	10037410	+	0.0361907	0.218469	0.709677	0.258065	0.0322581	0.0207916	-0.969833	-1.18894	1.01497
FDX1L	19	10420886	10426691	-	0.036204	0.218469	0.645161	0.354839	0	-0.559791	1.18989	NA	-1.74968
ATG7	3	11314009	11599139	+	0.0362408	0.218469	0.16129	0.806452	0.0322581	1.25251	0.519356	0.535082	0.732547
SETMAR	3	4344987	4356086	+	0.0362799	0.218469	0.16129	0.806452	0.0322581	1.41966	0.900824	-0.863443	0.586694
C17orf53	17	42219269	42239844	+	0.0362934	0.218469	0.709677	0.290323	0	3.09216	1.5271	NA	1.56506
BRI3	7	97910978	97920839	+	0.0363317	0.218469	0.645161	0.354839	0	-1.09903	0.862777	NA	-1.9618
GID8	20	61569440	61579827	+	0.0363317	0.218469	0.677419	0.322581	0	1.43174	0.841624	NA	0.590116
ZNF430	19	21203425	21242852	+	0.0363729	0.218469	0.645161	0.354839	0	1.57623	0.729386	NA	0.846847
TSSK4	14	24674856	24677454	+	0.0363821	0.218469	0.612903	0.387097	0	2.07443	0.777231	NA	1.2972
DPH7	9	140448895	140473078	-	0.0364841	0.218882	0.548387	0.419355	0.0322581	1.37371	0.592643	-0.192741	0.837169
PCDHGA4	5	140734591	140892546	+	0.0365447	0.218882	0.580645	0.419355	0	2.62166	1.15671	NA	1.46495
FAM115A	7	143548460	143599172	-	0.0365972	0.218882	0.645161	0.354839	0	2.60085	1.67184	NA	0.929013
TMEM88	17	7758383	7759417	+	0.0366042	0.218882	0.516129	0.419355	0.0645161	2.03969	0.882629	-0.557218	1.34904
DDX27	20	47835831	47860614	+	0.0366136	0.218882	0.677419	0.322581	0	1.05085	0.449009	NA	0.60184
CDC42BPB	14	103398715	103523742	-	0.0366272	0.218882	0.612903	0.387097	0	2.01007	1.11615	NA	0.893925
SMARCC2	12	56556142	56583358	-	0.0367531	0.21909	0.580645	0.419355	0	1.92099	1.18951	NA	0.731478
TMEM245	9	111777414	111882225	-	0.036801	0.21909	0.580645	0.387097	0.0322581	1.21122	0.0124206	0.985886	1.12392
UFSP1	7	100486343	100487339	-	0.0368367	0.21909	0.645161	0.354839	0	1.59677	0.964506	NA	0.632261
SPRYD7	13	50486837	50510637	-	0.0368635	0.21909	0.548387	0.354839	0.0967742	2.01285	1.60102	0.704093	0.604031
ZNF91	19	23540497	23578362	-	0.0369222	0.21909	0.645161	0.354839	0	2.56948	1.46095	NA	1.10853
OLFM2	19	9964393	9968844	-	0.0369443	0.21909	0.645161	0.354839	0	1.42416	-1.51435	NA	2.93852
HSD17B14	19	49316273	49339934	-	0.0369451	0.21909	0.677419	0.322581	0	4.14211	2.66262	NA	1.47949
FGF18	5	170846666	170884630	+	0.0369663	0.21909	0.580645	0.419355	0	2.22656	0.296763	NA	1.92979
CCT6B	17	33254877	33288528	-	0.0369698	0.21909	0.709677	0.290323	0	0.975667	-0.265039	NA	1.24071
CREB3	9	35732316	35737005	+	0.0369723	0.21909	0.580645	0.387097	0.0322581	1.26452	0.310027	-0.263266	0.998593
GTPBP3	19	17445790	17453540	+	0.0369911	0.21909	0.645161	0.354839	0	1.51171	0.792471	NA	0.719237
TACC3	4	1723216	1746905	+	0.0370181	0.21909	0.612903	0.387097	0	3.79088	2.39884	NA	1.39204
LRRC23	12	7013896	7023406	+	0.0372349	0.219701	0.580645	0.419355	0	3.2978	2.11609	NA	1.18171
PROCA1	17	27030214	27038109	+	0.0372359	0.219701	0.709677	0.258065	0.0322581	3.40424	1.20683	4.62337	1.81779
SWI5	9	131037657	131051268	+	0.0372499	0.219701	0.580645	0.387097	0.0322581	1.73603	0.831922	0.892565	0.899443
LSS	21	47608359	47648738	-	0.0372654	0.219701	0.16129	0.741935	0.0967742	-1.70406	-0.151202	0.215127	-1.59512
NAA35	9	88556056	88637213	+	0.0372962	0.219708	0.580645	0.387097	0.0322581	1.10361	0.63093	0.497018	0.482976
VSIG10L	19	51834794	51845378	-	0.0373513	0.219859	0.677419	0.322581	0	2.65039	0.608432	NA	2.04196
TSEN2	3	12525930	12574820	+	0.0374916	0.220295	0.16129	0.806452	0.0322581	1.57191	0.603071	-0.224454	1.00067
CXCL13	4	78432906	78532988	+	0.0375115	0.220295	0.580645	0.387097	0.0322581	1.04213	3.28637	2.67785	-2.19743
RPP25L	9	34610481	34612110	-	0.0375431	0.220295	0.580645	0.387097	0.0322581	1.37135	0.841812	0.233282	0.576344
MED7	5	156565450	156569786	-	0.0375436	0.220295	0.580645	0.387097	0.0322581	1.8031	1.00719	1.28499	0.774532
KCNH2	7	150642043	150652917	-	0.0376043	0.220351	0.645161	0.354839	0	5.37646	3.14436	NA	2.2321
ARHGEF18	19	7459998	7537371	+	0.0376164	0.220351	0.645161	0.354839	0	1.38702	0.32851	NA	1.05851
CARKD	13	111267880	111292340	+	0.0376419	0.220351	0.580645	0.322581	0.0967742	2.32437	1.24233	1.23478	1.08379
PRR12	19	50094899	50129696	+	0.0377235	0.220647	0.677419	0.322581	0	2.13225	1.1543	NA	0.977951
SRD5A3	4	56212387	56239267	+	0.037778	0.220647	0.612903	0.387097	0	-0.264423	1.13598	NA	-1.4004
CTSL	9	90340973	90346384	+	0.0377813	0.220647	0.580645	0.387097	0.0322581	2.53032	1.43632	-0.547512	1.2466
TBX3	12	115108058	115121969	-	0.0378219	0.220711	0.580645	0.419355	0	3.44027	1.78934	NA	1.65093
PTPN2	18	12785476	12884334	-	0.0378978	0.220745	0.548387	0.387097	0.0645161	0.76983	0.187823	-0.17698	0.634122
SREK1IP1	5	64013974	64064496	-	0.037907	0.220745	0.580645	0.419355	0	2.05663	1.19918	NA	0.857453
ATP5S	14	50779046	50789743	+	0.0379178	0.220745	0.612903	0.387097	0	1.20976	0.642017	NA	0.567739
NOP2	12	6666035	6677498	-	0.0379744	0.220745	0.580645	0.419355	0	1.77802	1.02734	NA	0.750687
CLDN15	7	100875372	100881227	-	0.0379757	0.220745	0.645161	0.354839	0	2.36558	1.54304	NA	0.822541
CLPTM1	19	45457841	45496604	+	0.0380541	0.221028	0.677419	0.322581	0	1.45091	0.798911	NA	0.651999
ID1	20	30193085	30194318	+	0.0380904	0.221067	0.612903	0.387097	0	2.92946	1.47834	NA	1.45112
NINJ1	9	95883770	95896570	-	0.0381338	0.221146	0.580645	0.387097	0.0322581	1.05647	0.168341	-2.1002	1.06263
EPB41L1	20	34679425	34820721	+	0.0382058	0.22128	0.677419	0.290323	0.0322581	1.76674	0.49041	0.670261	1.25834
SNRPD1	18	19192229	19210208	+	0.0382162	0.22128	0.548387	0.354839	0.0967742	1.96118	1.28078	1.2082	0.695954
RHBDF2	17	74466974	74483991	-	0.0382582	0.221351	0.677419	0.322581	0	-0.463499	0.566803	NA	-1.0303
TMEM167A	5	82348664	82373272	-	0.0383179	0.221486	0.645161	0.354839	0	2.01924	1.04451	NA	0.974736
DBNDD2	20	44034632	44039250	+	0.0383762	0.221486	0.677419	0.322581	0	1.31968	2.62497	NA	-1.30529
CCDC59	12	82746082	82752199	-	0.0384045	0.221486	0.580645	0.419355	0	0.484258	1.03455	NA	-0.550294
BRD8	5	137475458	137514358	-	0.0384138	0.221486	0.612903	0.387097	0	2.20673	1.37612	NA	0.830608
CIT	12	120123594	120315095	-	0.0384395	0.221486	0.580645	0.419355	0	4.3773	2.72315	NA	1.65415
GPD1	12	50497601	50505103	+	0.0384659	0.221486	0.645161	0.354839	0	3.5282	1.37728	NA	2.15092
VDAC1	5	133307565	133340657	-	0.0384896	0.221486	0.612903	0.387097	0	1.50358	1.03414	NA	0.469437
ANKRD13B	17	27920526	27941779	+	0.0385843	0.221548	0.709677	0.225806	0.0645161	3.07693	1.65479	2.07503	1.32875
ZNF746	7	149169883	149194898	-	0.0385987	0.221548	0.645161	0.354839	0	1.88719	1.17908	NA	0.708116
RAB11FIP4	17	29718641	29865236	+	0.0386197	0.221548	0.709677	0.258065	0.0322581	-1.23829	-0.56731	-0.0222724	-0.731535
TRIO	5	14143810	14510313	+	0.038632	0.221548	0.612903	0.387097	0	1.87565	0.994918	NA	0.880734
TARBP2	12	53894704	53900215	+	0.0386489	0.221548	0.645161	0.354839	0	1.36004	0.699182	NA	0.660863
EVI5L	19	7895160	7929862	+	0.0387654	0.221722	0.645161	0.354839	0	1.87967	1.12654	NA	0.753134
MIB1	18	19321289	19450918	+	0.038767	0.221722	0.548387	0.354839	0.0967742	1.75796	0.606006	1.94556	0.864904
PRR7	5	176873795	176883287	+	0.0387686	0.221722	0.612903	0.387097	0	2.68723	1.79545	NA	0.891777
TMED8	14	77801363	77840252	-	0.0389603	0.222492	0.612903	0.387097	0	3.16984	1.71503	NA	1.45481
CEP89	19	33369903	33462935	-	0.0389629	0.222492	0.677419	0.322581	0	2.20993	1.1864	NA	1.02353
TOX2	20	42543491	42698256	+	0.0390473	0.22264	0.677419	0.322581	0	3.86377	2.20192	NA	1.66185
NEK9	14	75548081	75593783	-	0.0390487	0.22264	0.612903	0.387097	0	1.72163	0.911907	NA	0.809721
CASP6	4	110609784	110624629	-	0.0391733	0.22318	0.580645	0.419355	0	0.103173	0.792436	NA	-0.689263
CDO1	5	115140429	115152354	-	0.0392575	0.223206	0.612903	0.387097	0	2.79194	0.796758	NA	1.99518
PLEK2	14	67853695	67878917	-	0.0392721	0.223206	0.612903	0.387097	0	-1.50678	-0.401326	NA	-1.10545
GLYR1	16	4853203	4897303	-	0.0392959	0.223206	0.16129	0.83871	0	1.81812	0.98086	NA	0.837257
ZFYVE20	3	15111579	15140655	-	0.0393164	0.223206	0.16129	0.806452	0.0322581	1.53041	0.946131	0.289217	0.609542
ATP2A3	17	3827162	3867758	-	0.0393601	0.223206	0.483871	0.451613	0.0645161	2.09476	1.09592	-0.130788	1.15218
ENDOV	17	78388966	78404171	+	0.039365	0.223206	0.645161	0.354839	0	1.5091	0.608673	NA	0.900425
KCTD10	12	109886459	109915349	-	0.0393876	0.223206	0.516129	0.483871	0	2.62744	1.60761	NA	1.01983
PAFAH1B1	17	2496922	2588909	+	0.0395814	0.224134	0.483871	0.451613	0.0645161	2.15656	0.82772	0.705757	1.34408
FOXD4	9	116230	118417	-	0.0397089	0.224686	0.516129	0.451613	0.0322581	2.25831	1.16914	0.145275	1.15742
COX6B1	19	36139124	36149686	+	0.0397611	0.22481	0.677419	0.322581	0	0.267442	1.77831	NA	-1.51087
CEP78	9	80850977	80881991	+	0.0398169	0.224846	0.580645	0.387097	0.0322581	2.3478	1.70699	1.45714	0.66003
DYRK4	12	4699237	4723054	+	0.0398279	0.224846	0.548387	0.451613	0	1.59121	0.912244	NA	0.678962
TMEM120B	12	122150657	122219974	+	0.039858	0.224846	0.580645	0.419355	0	0.215264	0.935501	NA	-0.720237
NPLOC4	17	79523910	79604179	-	0.0399173	0.224938	0.645161	0.354839	0	2.04353	1.18377	NA	0.859763
TBC1D3	17	36337527	36348621	-	0.0399581	0.224938	0.709677	0.290323	0	1.88023	0.373895	NA	1.50633
PCDHGA12	5	140810157	140812789	+	0.0400485	0.224938	0.580645	0.419355	0	3.73128	1.97333	NA	1.75795
TRAPPC6A	19	45666185	45681501	-	0.0400626	0.224938	0.677419	0.322581	0	0.28482	0.969352	NA	-0.684532
ZNF367	9	99148222	99180669	-	0.0400748	0.224938	0.548387	0.387097	0.0645161	2.59968	1.64209	0.942222	1.05758
PSMD2	3	184016885	184026842	+	0.0400841	0.224938	0.16129	0.774194	0.0645161	2.44381	1.57147	1.29853	0.893333
KIF12	9	116853917	116861337	-	0.0400856	0.224938	0.548387	0.419355	0.0322581	1.35523	0.138635	-0.916493	1.29196
MARVELD2	5	68710938	68737890	+	0.0401474	0.225116	0.419355	0.580645	0	1.23087	0.42644	NA	0.804427
AKAP9	7	91570188	91739987	+	0.0403184	0.22566	0.645161	0.354839	0	1.49017	0.643944	NA	0.846221
ASS1	9	133320093	133376661	+	0.0403416	0.22566	0.612903	0.354839	0.0322581	1.96637	0.627867	0.357854	1.36101
TMEM33	4	41937136	41962824	+	0.0403552	0.22566	0.580645	0.419355	0	1.84039	1.05749	NA	0.782899
PER1	17	8043787	8055753	-	0.0403657	0.22566	0.516129	0.419355	0.0645161	0.514386	-0.778613	1.29358	1.01671
MAP1B	5	71403094	71505397	+	0.0404306	0.225854	0.645161	0.354839	0	5.55656	3.519	NA	2.03756
CYB5D2	17	4046461	4060991	+	0.0406634	0.226984	0.483871	0.451613	0.0645161	1.65568	0.704461	0.337064	0.99714
TBC1D16	17	77906141	78009657	-	0.0407334	0.227133	0.645161	0.354839	0	0.0457832	0.773539	NA	-0.727756
MRFAP1L1	4	6709427	6711606	-	0.040751	0.227133	0.580645	0.419355	0	1.93144	1.17559	NA	0.755853
KMT2B	19	36208920	36229781	+	0.0408232	0.227365	0.677419	0.322581	0	1.20726	0.520734	NA	0.686523
DDHD1	14	53503457	53620046	-	0.0408661	0.227434	0.612903	0.387097	0	2.6169	1.76056	NA	0.856333
PLOD3	7	100849257	100861011	-	0.0409567	0.227768	0.645161	0.354839	0	2.39212	0.105104	NA	2.28701
DAP	5	10679341	10761387	-	0.0410476	0.227918	0.612903	0.387097	0	0.123931	-0.396214	NA	0.520145
GNPNAT1	14	53241910	53258386	-	0.0410517	0.227918	0.612903	0.387097	0	-0.878619	-0.23054	NA	-0.648079
CHPF2	7	150929574	150935913	+	0.0410754	0.227918	0.612903	0.387097	0	2.19247	1.31008	NA	0.882394
ALOX15	17	4534213	4544960	-	0.0411241	0.228018	0.483871	0.451613	0.0645161	2.21338	-0.0760275	-1.27986	2.43988
TIMM50	19	39971051	39984425	+	0.0411853	0.228188	0.677419	0.322581	0	1.63867	0.990901	NA	0.647773
APPL2	12	105567074	105627183	-	0.0414025	0.229221	0.516129	0.483871	0	1.6599	0.77311	NA	0.886791
PAK4	19	39616419	39670046	+	0.0415765	0.230014	0.677419	0.322581	0	1.66757	0.178052	NA	1.48951
PLAC8L1	5	145463875	145483946	-	0.041624	0.230105	0.580645	0.419355	0	1.84202	0.831024	NA	1.011
NOL4	18	31431063	31628576	-	0.041743	0.230592	0.580645	0.354839	0.0645161	5.1047	3.25959	4.33508	1.67965
CNPY2	12	56704211	56710128	-	0.041792	0.230622	0.580645	0.419355	0	2.0464	1.11218	NA	0.934223
NME5	5	137450860	137475132	-	0.0418243	0.230622	0.612903	0.387097	0	2.11465	0.57366	NA	1.54099
LRRC46	17	45908992	45915079	+	0.0418515	0.230622	0.645161	0.354839	0	2.92367	1.28611	NA	1.63756
DKK2	4	107842958	107957453	-	0.0418722	0.230622	0.580645	0.419355	0	3.58228	1.73076	NA	1.85152
RGS19	20	62704533	62710845	-	0.0419487	0.230873	0.677419	0.322581	0	2.05914	0.408007	NA	1.65113
ASB16	17	42248073	42256451	+	0.0420029	0.230917	0.709677	0.290323	0	2.5858	0.694331	NA	1.89147
CXCL9	4	76922494	76928676	-	0.0420551	0.230917	0.612903	0.387097	0	1.77176	3.8523	NA	-2.08055
KPNA3	13	50273442	50367057	-	0.0420711	0.230917	0.580645	0.322581	0.0967742	2.0973	1.46626	1.23762	0.683803
EID2	19	40029445	40030838	-	0.0420993	0.230917	0.677419	0.322581	0	2.3594	1.38551	NA	0.973896
PCGF2	17	36890149	36904558	-	0.0421117	0.230917	0.709677	0.290323	0	3.25284	1.6229	NA	1.62993
CCDC122	13	44410487	44453826	-	0.0422306	0.231399	0.580645	0.322581	0.0967742	2.21197	1.44511	0.427356	1.00172
ZNF506	19	19903519	19932560	-	0.0423823	0.232059	0.645161	0.354839	0	1.96617	1.11463	NA	0.851545
PROX2	14	75319735	75330537	+	0.0424429	0.232221	0.612903	0.387097	0	3.28211	1.74438	NA	1.53773
PABPN1	14	23789396	23795394	+	0.0425221	0.232483	0.612903	0.387097	0	1.89491	0.700562	NA	1.19435
ZNF225	19	44617514	44638969	+	0.0426385	0.232948	0.677419	0.322581	0	1.93118	0.915901	NA	1.01528
PCDHB5	5	140514787	140517709	+	0.0427267	0.23326	0.580645	0.419355	0	2.29573	0.728674	NA	1.56705
MOB3A	19	2071034	2096269	-	0.0428108	0.233548	0.612903	0.387097	0	1.64104	0.714127	NA	0.926913
GPC6	13	93879060	95060274	+	0.0429374	0.234067	0.580645	0.322581	0.0967742	5.17472	3.64767	2.45054	1.80331
AGR3	7	16899029	16921613	-	0.0430332	0.234418	0.645161	0.354839	0	0.339577	-1.22408	NA	1.56365
LPIN3	20	39969492	39989225	+	0.0431379	0.23476	0.677419	0.322581	0	1.55856	0.614963	NA	0.943601
PRR22	19	5782970	5784776	+	0.0432114	0.23476	0.645161	0.354839	0	1.69277	0.884506	NA	0.808261
KLHL3	5	136953188	137042116	-	0.0432156	0.23476	0.612903	0.387097	0	4.19031	2.39207	NA	1.79824
NAGS	17	42082031	42086436	+	0.0432686	0.23476	0.709677	0.290323	0	3.88784	1.70981	NA	2.17803
LAT2	7	73624086	73644164	+	0.0432812	0.23476	0.645161	0.354839	0	4.19427	2.9313	NA	1.26298
PCK1	20	56136136	56141513	+	0.0432884	0.23476	0.677419	0.322581	0	5.6579	2.35638	NA	3.30152
CTNNBL1	20	36322356	36500531	+	0.0433165	0.23476	0.677419	0.322581	0	1.72275	1.11535	NA	0.6074
NAGPA	16	5074844	5083942	-	0.0434718	0.23543	0.16129	0.83871	0	2.49231	1.80827	NA	0.684041
DNAJC18	5	138745891	138775214	-	0.0435518	0.235692	0.612903	0.387097	0	3.31344	1.55036	NA	1.76307
NOVA1	14	26915088	27066960	-	0.0435895	0.235725	0.612903	0.387097	0	4.85487	2.6262	NA	2.22867
LIG4	13	108859789	108867130	-	0.0436482	0.235871	0.580645	0.322581	0.0967742	2.8431	1.79197	1.56987	1.10238
FAM3C	7	120988904	121036422	-	0.0437177	0.235957	0.645161	0.354839	0	0.991366	0.36556	NA	0.625806
DNAJA1	9	33025200	33039905	+	0.0437275	0.235957	0.548387	0.387097	0.0645161	2.74185	1.90217	0.891207	0.984111
CDK5	7	150750898	150755052	-	0.0437775	0.236057	0.645161	0.354839	0	2.36284	1.53593	NA	0.826913
MRPL50	9	104152248	104160919	-	0.0438372	0.236208	0.548387	0.387097	0.0645161	1.13071	0.650672	0.237969	0.538998
GGACT	13	101182417	101241046	-	0.0439621	0.236603	0.580645	0.322581	0.0967742	-2.30987	-1.11402	-2.10227	-0.96779
C4orf48	4	2043719	2045697	+	0.0440269	0.236603	0.580645	0.419355	0	3.07437	1.20897	NA	1.86541
ZFHX2	14	23990063	24020858	-	0.0440293	0.236603	0.612903	0.387097	0	3.60827	2.04801	NA	1.56026
MSX1	4	4861391	4865663	+	0.0440377	0.236603	0.580645	0.419355	0	1.92419	0.546949	NA	1.37724
ANKLE2	12	133302252	133338474	-	0.0441342	0.236951	0.580645	0.419355	0	1.76822	1.17219	NA	0.596025
CTAGE8	7	143963766	143966877	-	0.0441732	0.236989	0.645161	0.354839	0	0.665008	0.0270797	NA	0.637929
TMEM86B	19	55738001	55740632	-	0.0442576	0.237272	0.677419	0.322581	0	2.59499	1.21021	NA	1.38478
PTGES2	9	130882971	130890467	-	0.0443954	0.237718	0.580645	0.387097	0.0322581	1.46102	0.645892	0.830157	0.800956
TCTN2	12	124155659	124192950	+	0.0444934	0.237718	0.580645	0.419355	0	2.45872	1.29226	NA	1.16646
PCDHA12	5	140254886	140391929	+	0.0445232	0.237718	0.580645	0.419355	0	2.04551	0.212946	NA	1.83257
NCOA3	20	46130600	46285621	+	0.0445377	0.237718	0.677419	0.322581	0	1.69346	0.85208	NA	0.841376
TMEM229B	14	67936982	67982021	-	0.0445473	0.237718	0.612903	0.387097	0	-0.23052	0.642398	NA	-0.872919
LNX1	4	54326436	54424436	-	0.0445729	0.237718	0.612903	0.387097	0	0.629747	-0.445733	NA	1.07548
SURF4	9	136228324	136243037	-	0.0446201	0.237718	0.612903	0.354839	0.0322581	1.52276	0.757567	-0.754461	0.891196
IFNAR2	21	34602199	34635062	+	0.0446279	0.237718	0.16129	0.741935	0.0967742	1.59526	0.6828	0.777699	0.901512
TBX21	17	45810609	45823485	+	0.0447513	0.237973	0.645161	0.354839	0	0.220979	1.80261	NA	-1.58164
B9D1	17	19238684	19281506	-	0.0447587	0.237973	0.516129	0.419355	0.0645161	1.69741	0.975566	-0.544193	0.924478
BBS12	4	123653856	123666098	+	0.0447966	0.237973	0.580645	0.419355	0	3.19369	1.90164	NA	1.29205
GATA6	18	19749397	19782491	+	0.0448398	0.237973	0.548387	0.354839	0.0967742	-1.35487	-0.449433	-0.330754	-0.930864
LIAS	4	39460643	39465434	+	0.0448923	0.237973	0.612903	0.387097	0	1.20886	0.639348	NA	0.56951
HSPB9	17	40274755	40275371	+	0.0449762	0.237973	0.709677	0.290323	0	-1.91227	0.0665186	NA	-1.97879
ZNF671	19	58231114	58238992	-	0.0449948	0.237973	0.645161	0.354839	0	2.468	1.27766	NA	1.19034
WDR62	19	36545782	36596012	+	0.0450361	0.237973	0.677419	0.322581	0	3.53418	2.18591	NA	1.34826
SUN1	7	855193	883509	+	0.0450467	0.237973	0.645161	0.354839	0	1.47534	0.672132	NA	0.803209
CRLF3	17	29109701	29151778	-	0.0450677	0.237973	0.709677	0.258065	0.0322581	1.31211	0.525831	1.18347	0.713206
TAS2R31	12	11182985	11184006	-	0.0450718	0.237973	0.548387	0.451613	0	0.971962	-0.327482	NA	1.29944
CWC25	17	36956686	36981603	-	0.045091	0.237973	0.709677	0.290323	0	1.42751	0.64075	NA	0.786764
ATCAY	19	3880617	3928080	+	0.0451601	0.238169	0.612903	0.387097	0	5.92963	2.84691	NA	3.08272
UCHL3	13	76123615	76180156	+	0.0451929	0.238174	0.580645	0.322581	0.0967742	1.67797	1.14981	-1.26034	1.08434
RPL18A	19	17970686	17974133	+	0.045236	0.238232	0.645161	0.354839	0	-1.61285	-0.570825	NA	-1.04202
ZMYND8	20	45837858	45985633	-	0.0452968	0.238384	0.677419	0.322581	0	2.78694	1.64738	NA	1.13956
CCDC174	3	14693252	14714166	+	0.0453567	0.238531	0.16129	0.806452	0.0322581	1.5712	0.670477	1.45828	0.870422
CDS2	20	5107406	5178533	+	0.0454023	0.238602	0.709677	0.258065	0.0322581	2.58941	0.127213	1.52678	2.30669
C5orf38	5	2752244	2754490	+	0.0454537	0.238704	0.612903	0.387097	0	4.65628	1.18149	NA	3.47479
C9orf43	9	116172923	116191964	+	0.0455046	0.238797	0.580645	0.387097	0.0322581	1.42074	0.54489	-4.00476	1.22583
PAN3	13	28712642	28869475	+	0.0455882	0.238797	0.580645	0.322581	0.0967742	1.15094	-0.0609329	0.781372	1.0175
PITPNM2	12	123468026	123594975	-	0.0455885	0.238797	0.580645	0.419355	0	2.47219	0.998892	NA	1.4733
SNAI1	20	48599512	48605423	+	0.0455997	0.238797	0.677419	0.322581	0	2.35679	0.801642	NA	1.55515
MAMSTR	19	49215978	49220278	-	0.0456674	0.238873	0.677419	0.322581	0	1.96054	0.714271	NA	1.24627
ZNF676	19	22361902	22379753	-	0.0457126	0.238873	0.645161	0.354839	0	-0.973723	0.731051	NA	-1.70477
MCOLN1	19	7587495	7598895	+	0.0457573	0.238873	0.645161	0.354839	0	2.32777	1.51702	NA	0.810748
FOXJ1	17	74132413	74137380	-	0.0457632	0.238873	0.677419	0.322581	0	4.80117	1.70088	NA	3.10029
WDR88	19	33622997	33666705	+	0.0458179	0.238873	0.677419	0.322581	0	2.04824	1.01612	NA	1.03212
ZNF563	19	12428290	12444534	-	0.0458555	0.238873	0.612903	0.387097	0	1.94248	1.30064	NA	0.641835
ZMYM2	13	20532809	20665984	+	0.0458705	0.238873	0.548387	0.354839	0.0967742	1.64466	1.11814	0.894947	0.57435
GABRG2	5	161494647	161582545	+	0.045944	0.239021	0.612903	0.354839	0.0322581	4.74317	2.53531	0.440144	2.38246
ZNF385C	17	40177593	40190044	-	0.046019	0.239021	0.709677	0.290323	0	-1.07786	-0.0137713	NA	-1.06409
P2RX1	17	3799884	3819960	-	0.0460201	0.239021	0.483871	0.451613	0.0645161	-5.64469	-4.7589	0.752652	-1.57474
MZF1	19	59073283	59084942	-	0.0460273	0.239021	0.645161	0.354839	0	2.84306	1.63875	NA	1.20431
CHD6	20	40030740	40247133	-	0.0461157	0.239314	0.677419	0.322581	0	2.3925	1.38806	NA	1.00444
DEDD2	19	42702744	42721944	-	0.0462148	0.239582	0.677419	0.322581	0	2.07912	1.30558	NA	0.773537
GZMH	14	25075685	25078926	-	0.0462875	0.239582	0.612903	0.387097	0	0.521885	1.99965	NA	-1.47776
ZNF652	17	47366567	47439476	-	0.046296	0.239582	0.709677	0.290323	0	1.65681	0.90803	NA	0.748782
LYZ	12	69742133	69748013	+	0.046296	0.239582	0.645161	0.354839	0	2.97104	0.770552	NA	2.20049
ZFP37	9	115804094	115819071	-	0.0464476	0.240124	0.580645	0.387097	0.0322581	2.38193	1.23258	1.92941	1.09576
PPM1E	17	56833229	57062540	-	0.0464906	0.240124	0.677419	0.322581	0	3.74353	1.07339	NA	2.67015
PCDHB16	5	140561264	140565796	+	0.0464995	0.240124	0.580645	0.419355	0	2.85162	1.26216	NA	1.58946
SNX21	20	44462469	44471914	+	0.04655	0.240124	0.677419	0.322581	0	1.42692	0.410894	NA	1.01603
ALDH1L2	12	105413561	105478341	-	0.046562	0.240124	0.516129	0.483871	0	-0.736293	-2.60355	NA	1.86726
TCEA2	20	62688438	62703700	+	0.0466756	0.24047	0.677419	0.322581	0	1.64199	0.214128	NA	1.42787
AMN1	12	31824070	31882108	-	0.0466935	0.24047	0.580645	0.419355	0	1.36405	0.570902	NA	0.79315
TRRAP	7	98476112	98610866	+	0.0469075	0.240785	0.645161	0.354839	0	1.99593	1.36941	NA	0.626519
NAT16	7	100813773	100823557	-	0.0469226	0.240785	0.645161	0.354839	0	4.92937	1.70058	NA	3.22879
ZBTB45	19	59024896	59030926	-	0.0469383	0.240785	0.645161	0.354839	0	1.44809	0.723367	NA	0.724723
GMEB2	20	62218946	62258454	-	0.046964	0.240785	0.677419	0.322581	0	0.968378	0.275737	NA	0.692641
CEP76	18	12661954	12702776	-	0.0469673	0.240785	0.548387	0.387097	0.0645161	1.93999	1.2679	0.916093	0.722342
C7orf60	7	112459201	112579971	-	0.04708	0.241031	0.645161	0.354839	0	2.09812	1.08606	NA	1.01206
CALM1	14	90863326	90874619	+	0.0470936	0.241031	0.612903	0.387097	0	2.94402	1.73219	NA	1.21183
VASH1	14	77228234	77249363	+	0.0471522	0.241166	0.612903	0.387097	0	3.29939	2.16899	NA	1.1304
ABHD8	19	17402939	17414282	-	0.0471952	0.24122	0.645161	0.354839	0	1.9713	1.09581	NA	0.875489
SUGP2	19	19101695	19144380	-	0.0472437	0.241302	0.645161	0.354839	0	2.90181	1.84492	NA	1.05689
FAM83G	17	18874380	18908060	-	0.0473069	0.24146	0.516129	0.419355	0.0645161	0.625959	-0.426486	-0.471077	1.05839
LAMP5	20	9495004	9511171	+	0.0473929	0.241578	0.709677	0.258065	0.0322581	4.81102	2.73877	2.05383	2.14835
APMAP	20	24943579	24973425	-	0.047395	0.241578	0.709677	0.258065	0.0322581	2.16602	1.49241	0.0339027	0.83567
PLA2G1B	12	120759913	120765592	-	0.0474341	0.241612	0.580645	0.419355	0	-11.8174	-8.17705	NA	-3.64032
FAM210B	20	54933982	54943719	+	0.0475996	0.242209	0.677419	0.322581	0	1.60511	0.597151	NA	1.00796
NUTM2G	9	99691285	99701700	+	0.0476162	0.242209	0.548387	0.387097	0.0645161	0.929686	-0.20824	-0.0289229	1.11231
SOX18	20	62679078	62680979	-	0.0476664	0.242299	0.677419	0.322581	0	2.59003	0.874194	NA	1.71584
ELOVL6	4	110970228	111119771	-	0.0477549	0.242583	0.580645	0.419355	0	3.75756	2.75188	NA	1.00567
NAPEPLD	7	102740022	102789569	-	0.0478033	0.242664	0.645161	0.354839	0	1.53439	0.668259	NA	0.866127
AGPAT2	9	139567594	139581911	-	0.0479293	0.243138	0.580645	0.387097	0.0322581	0.37162	-0.386137	-4.60748	1.08248
PPP3CA	4	101944586	102268628	-	0.0482021	0.243735	0.580645	0.419355	0	1.74933	0.760405	NA	0.988929
FUT6	19	5830636	5839742	-	0.048206	0.243735	0.645161	0.354839	0	-2.7244	-0.899606	NA	-1.8248
MLANA	9	5890908	5909822	+	0.0482161	0.243735	0.516129	0.451613	0.0322581	1.5317	0.272176	-1.59048	1.3837
ARHGEF35	7	143883175	143892791	-	0.0482189	0.243735	0.645161	0.354839	0	0.930953	0.370375	NA	0.560578
CAMSAP3	19	7660787	7683196	+	0.04822	0.243735	0.645161	0.354839	0	1.12877	0.195895	NA	0.93288
PRKRIP1	7	102036803	102067129	-	0.0482467	0.243735	0.612903	0.387097	0	1.83652	0.970359	NA	0.866162
APTX	9	32972603	33001574	-	0.048311	0.243735	0.548387	0.387097	0.0645161	1.32115	0.833808	-0.0953169	0.620078
GLT1D1	12	129337978	129469509	+	0.0483264	0.243735	0.580645	0.419355	0	4.43291	2.17926	NA	2.25365
LIN7B	19	49617617	49621717	+	0.0483415	0.243735	0.677419	0.322581	0	1.65551	0.571759	NA	1.08375
TIMM21	18	71815745	71826204	+	0.0485312	0.244392	0.516129	0.419355	0.0645161	1.48854	0.526125	1.02506	0.895893
MRPS7	17	73257748	73262457	+	0.0485374	0.244392	0.677419	0.322581	0	1.46358	0.767568	NA	0.696017
C18orf42	18	5145283	5197502	-	0.0485915	0.244499	0.483871	0.451613	0.0645161	3.20389	1.08907	4.80864	1.64988
RHOBTB3	5	95066849	95132071	+	0.0486807	0.244783	0.612903	0.387097	0	0.431152	-0.930897	NA	1.36205
POLE2	14	50110269	50155098	-	0.0487626	0.244923	0.612903	0.387097	0	2.596	1.4273	NA	1.1687
DDX52	17	35969786	36003493	-	0.0487743	0.244923	0.709677	0.290323	0	1.31293	0.692548	NA	0.620378
ZNF850	19	37234379	37263716	-	0.0490109	0.245735	0.677419	0.322581	0	2.02737	0.814133	NA	1.21324
LSM11	5	157170702	157187717	+	0.0490224	0.245735	0.580645	0.387097	0.0322581	2.21428	1.11112	2.74434	0.977527
OXGR1	13	97637972	97646730	-	0.0490621	0.245735	0.580645	0.322581	0.0967742	2.48414	0.320257	-1.17951	2.50999
SPHK2	19	49122547	49133663	+	0.0490731	0.245735	0.677419	0.322581	0	2.69288	1.6805	NA	1.01238
ANAPC11	17	79848665	79858409	+	0.0491253	0.245735	0.645161	0.354839	0	0.914942	2.07487	NA	-1.15992
TMEM261	9	7796489	7799806	-	0.0491589	0.245735	0.516129	0.451613	0.0322581	1.71277	1.26957	0.745832	0.478116
OGG1	3	9791627	9799091	+	0.0491799	0.245735	0.16129	0.806452	0.0322581	1.96774	1.2757	1.71446	0.675164
MAN2B2	4	6576900	6624130	+	0.0491997	0.245735	0.580645	0.419355	0	2.07912	1.05148	NA	1.02764
WDR17	4	176986984	177103979	+	0.0492526	0.245834	0.516129	0.483871	0	3.20297	1.63255	NA	1.57042
ZC3H13	13	46528599	46626913	-	0.0492989	0.2459	0.580645	0.322581	0.0967742	1.59035	1.13393	0.876386	0.515856
AOC2	17	40996599	41002729	+	0.0493871	0.246001	0.709677	0.290323	0	2.96233	1.32664	NA	1.63568
EPM2AIP1	3	37027356	37034795	-	0.0494179	0.246001	0.16129	0.806452	0.0322581	2.54215	1.54833	1.96822	0.97767
CKB	14	103985994	103989196	-	0.0494198	0.246001	0.612903	0.387097	0	3.30901	1.93653	NA	1.37248
FANCD2	3	10068070	10141344	+	0.0494511	0.246001	0.16129	0.806452	0.0322581	2.32444	1.42292	-1.03418	0.996026
ENO2	12	7023613	7032859	+	0.0495349	0.246253	0.580645	0.419355	0	5.3475	3.28795	NA	2.05955
PTGS1	9	125132808	125157982	-	0.0495798	0.246312	0.645161	0.322581	0.0322581	2.19717	1.09824	-0.548338	1.24862
VMP1	17	57784825	57919616	+	0.0496225	0.24636	0.677419	0.322581	0	-0.118921	1.34326	NA	-1.46218
SHROOM1	5	132157832	132162002	-	0.0497373	0.246766	0.612903	0.387097	0	1.86237	1.23565	NA	0.626722
ZNF792	19	35447257	35454953	-	0.0498062	0.246911	0.677419	0.322581	0	1.8686	0.796572	NA	1.07203
CAMK2B	7	44256748	44365230	-	0.0498329	0.246911	0.645161	0.354839	0	5.01392	2.60719	NA	2.40674
C9orf152	9	112961840	112970413	-	0.0498944	0.247009	0.580645	0.387097	0.0322581	0.316372	-1.8342	-1.74241	2.14351
PPM1K	4	89178760	89205983	+	0.049919	0.247009	0.580645	0.419355	0	1.84175	0.777679	NA	1.06407
ZFYVE1	14	73436152	73453664	-	0.0499736	0.247116	0.612903	0.387097	0	2.16387	1.52776	NA	0.63611
TBC1D19	4	26585545	26757835	+	0.0500128	0.247145	0.612903	0.387097	0	2.40486	1.1333	NA	1.27156
EML1	14	100259744	100408397	+	0.0500813	0.24732	0.612903	0.387097	0	2.32275	1.21774	NA	1.10502
TMEM173	5	138855112	138861887	-	0.0501208	0.247351	0.612903	0.387097	0	2.58984	1.3449	NA	1.24494
WWC1	5	167719064	167899308	+	0.0501945	0.247551	0.580645	0.419355	0	0.740562	-0.0822311	NA	0.822793
ZNF286B	17	18561741	18585572	-	0.0503432	0.248108	0.516129	0.419355	0.0645161	2.57057	1.81928	0.461111	0.932379
NCOR1	17	15933407	16097953	-	0.0503888	0.248108	0.516129	0.419355	0.0645161	1.54936	1.06647	0.993611	0.492596
ZBTB6	9	125670334	125675607	-	0.0504556	0.248108	0.645161	0.322581	0.0322581	1.85063	1.08003	1.47186	0.734978
JMY	5	78531924	78623038	+	0.0504799	0.248108	0.645161	0.354839	0	0.708719	0.112498	NA	0.596221
COL25A1	4	109731876	110223523	-	0.0505058	0.248108	0.580645	0.419355	0	2.7887	0.536572	NA	2.25213
FSD1L	9	108210314	108314714	+	0.0505071	0.248108	0.548387	0.419355	0.0322581	3.44725	2.169	3.48435	1.1843
AP5M1	14	57735605	57756797	+	0.0507566	0.249169	0.612903	0.387097	0	2.37848	1.6499	NA	0.728579
AURKC	19	57742376	57746916	+	0.0509018	0.249717	0.645161	0.354839	0	2.77321	1.54667	NA	1.22653
PPP1R9B	17	48211098	48227878	-	0.0509797	0.249935	0.709677	0.290323	0	2.19682	1.25218	NA	0.944642
CSF3	17	38171613	38174066	+	0.0510318	0.250026	0.677419	0.322581	0	-0.554801	-3.21812	NA	2.66332
GRIA2	4	158141735	158287227	+	0.0510677	0.250037	0.516129	0.483871	0	4.101	2.15653	NA	1.94447
DCLK3	3	36753912	36781352	-	0.0511338	0.250196	0.16129	0.806452	0.0322581	2.601	1.50423	4.19632	0.993222
SMIM5	17	73629513	73637486	+	0.0512371	0.250537	0.677419	0.322581	0	3.98231	1.9795	NA	2.0028
SRCRB4D	7	76018645	76039012	-	0.0513353	0.250784	0.645161	0.354839	0	-2.0541	-0.590979	NA	-1.46312
RAD51D	17	33426810	33446888	-	0.0513548	0.250784	0.709677	0.290323	0	1.81547	1.11582	NA	0.699654
MKRN1	7	140152839	140179369	-	0.0514549	0.250978	0.645161	0.354839	0	1.08069	0.72217	NA	0.358515
DHX34	19	47852537	47885961	+	0.0514619	0.250978	0.677419	0.322581	0	1.63905	1.00013	NA	0.63892
ACAP1	17	7239847	7254793	+	0.0516399	0.251297	0.483871	0.451613	0.0645161	2.4106	1.34628	2.5994	0.907675
USP38	4	144106069	144136718	+	0.05166	0.251297	0.612903	0.387097	0	1.71134	1.06002	NA	0.65132
NCOR2	12	124808956	125052010	-	0.0516822	0.251297	0.580645	0.419355	0	1.93243	1.06738	NA	0.865055
CENPB	20	3764497	3767337	-	0.0516874	0.251297	0.709677	0.258065	0.0322581	1.56673	0.917331	0.676624	0.676142
COPS7A	12	6833149	6841041	+	0.051696	0.251297	0.580645	0.419355	0	2.54418	1.1816	NA	1.36258
COPG1	3	128968452	128996616	+	0.0517461	0.251337	0.16129	0.806452	0.0322581	0.94998	0.685456	0.168647	0.2844
TP53INP2	20	33292111	33301243	+	0.0517867	0.251337	0.709677	0.290323	0	1.80563	0.29759	NA	1.50804
EMB	5	49692030	49737234	-	0.0518054	0.251337	0.483871	0.516129	0	4.16703	2.77187	NA	1.39516
IRF2BP1	19	46386864	46389428	-	0.0519126	0.251438	0.677419	0.322581	0	1.85569	0.974726	NA	0.88096
REEP2	5	137774689	137782658	+	0.051913	0.251438	0.612903	0.387097	0	5.43264	3.01785	NA	2.41478
LRRC16B	14	24521205	24538937	+	0.0519274	0.251438	0.612903	0.387097	0	3.62955	2.74458	NA	0.884972
LRP1	12	57522281	57607142	+	0.0520298	0.251712	0.580645	0.419355	0	2.71812	1.68906	NA	1.02906
NOL6	9	33461350	33473941	-	0.0520515	0.251712	0.548387	0.387097	0.0645161	0.904671	0.538901	-1.10492	0.600602
SPARC	5	151040656	151066615	-	0.0521083	0.251823	0.580645	0.387097	0.0322581	4.21674	2.66679	3.46605	1.48847
U2AF1	21	44513065	44527688	-	0.0522388	0.25229	0.16129	0.741935	0.0967742	1.30879	0.412001	0.00913695	0.943276
MPHOSPH9	12	123640942	123717785	-	0.0523008	0.252369	0.580645	0.419355	0	2.55322	1.7596	NA	0.793619
PPWD1	5	64859062	64883376	-	0.0523228	0.252369	0.580645	0.419355	0	1.39104	-0.417227	NA	1.80827
ELOVL7	5	60047615	60140101	-	0.0523807	0.252485	0.580645	0.419355	0	0.0851901	-0.731214	NA	0.816405
MINK1	17	4736634	4801356	+	0.0525806	0.253284	0.483871	0.451613	0.0645161	1.70907	0.80112	0.112047	0.994088
THSD1	13	52951301	52980629	-	0.0527677	0.254021	0.580645	0.322581	0.0967742	3.71551	2.46427	2.94236	1.14091
CENPP	9	95087749	95377446	+	0.0528375	0.254193	0.580645	0.387097	0.0322581	2.19268	1.30404	1.37815	0.882945
GLTSCR1	19	48111452	48206534	+	0.0530513	0.254606	0.677419	0.322581	0	2.30775	1.34299	NA	0.964757
WBSCR28	7	73275488	73280223	+	0.053056	0.254606	0.645161	0.354839	0	3.90823	2.07921	NA	1.82902
ESYT2	7	158523688	158622319	-	0.0530601	0.254606	0.645161	0.354839	0	1.64761	0.753271	NA	0.894341
FASN	17	80036213	80056106	-	0.0531237	0.254748	0.645161	0.354839	0	2.36458	1.55155	NA	0.813036
C19orf44	19	16607121	16629269	+	0.0534054	0.255934	0.645161	0.354839	0	1.7268	0.931251	NA	0.79555
CXCL14	5	134906368	134914969	-	0.0534436	0.255952	0.612903	0.387097	0	0.270119	-1.92971	NA	2.19983
RAB19	7	140103842	140126050	+	0.0535694	0.25639	0.645161	0.354839	0	1.4181	0.44448	NA	0.973624
PRR4	12	10998447	11002075	+	0.0536634	0.256675	0.548387	0.451613	0	2.0663	1.12966	NA	0.936641
LIMCH1	4	41361623	41702061	+	0.0537823	0.257079	0.612903	0.387097	0	3.21813	1.61307	NA	1.60506
ANKRD10	13	111530886	111567454	-	0.053933	0.257536	0.580645	0.322581	0.0967742	1.42414	0.812403	0.143213	0.766162
ZNF812	19	9800599	9811452	-	0.0539929	0.257536	0.612903	0.387097	0	2.56157	1.27761	NA	1.28396
SGCD	5	155753766	156185070	+	0.0540408	0.257536	0.580645	0.387097	0.0322581	2.99835	1.4634	-0.935883	1.71951
VOPP1	7	55538300	55594573	-	0.0540918	0.257536	0.645161	0.354839	0	2.60966	0.0708275	NA	2.53883
C17orf75	17	30655459	30669228	-	0.0541318	0.257536	0.709677	0.290323	0	2.0687	1.13214	NA	0.936559
IFFO1	12	6648693	6665249	-	0.0541701	0.257536	0.580645	0.419355	0	2.55942	1.53138	NA	1.02804
USP42	7	6144549	6201195	+	0.054176	0.257536	0.645161	0.354839	0	1.55243	0.176755	NA	1.37568
AK7	14	96858447	96955764	+	0.054189	0.257536	0.612903	0.387097	0	2.52199	1.28197	NA	1.24002
ADAMTSL2	9	136397285	136440641	+	0.054291	0.257856	0.612903	0.354839	0.0322581	3.75844	2.48217	0.941277	1.40467
SPIB	19	50922194	50934310	+	0.0544564	0.258102	0.677419	0.322581	0	-0.733249	0.961388	NA	-1.69464
HSPA9	5	137890570	137911318	-	0.0544661	0.258102	0.612903	0.387097	0	1.73394	0.576703	NA	1.15724
CD9	12	6308872	6347437	+	0.0544754	0.258102	0.580645	0.419355	0	1.59527	0.663857	NA	0.93141
PABPC5	X	90689596	90693583	+	0.0545638	0.258102	0.290323	0.612903	0.0967742	3.40329	1.81047	2.6615	1.47678
TINF2	14	24708848	24711880	-	0.0545731	0.258102	0.612903	0.387097	0	-0.117093	-1.97482	NA	1.85773
NT5DC3	12	104166080	104234975	-	0.0546025	0.258102	0.580645	0.419355	0	2.58367	1.11067	NA	1.473
SETD1B	12	122242637	122270562	+	0.0546048	0.258102	0.580645	0.419355	0	1.39491	0.792079	NA	0.60283
OXCT1	5	41730166	41870791	-	0.0546199	0.258102	0.612903	0.387097	0	3.59599	2.04703	NA	1.54895
C20orf195	20	62184372	62188061	+	0.0546918	0.258211	0.677419	0.322581	0	5.25392	2.85396	NA	2.39996
MAP2K4	17	11924134	12047148	+	0.0547312	0.258211	0.516129	0.419355	0.0645161	1.30885	-0.0527637	0.577111	1.27763
SH3RF2	5	145316125	145442879	+	0.0547468	0.258211	0.580645	0.419355	0	-5.13808	-2.9624	NA	-2.17568
LCN12	9	139846767	139849949	+	0.054841	0.258395	0.580645	0.387097	0.0322581	2.74713	1.71595	-2.01763	1.31838
LETM1	4	1813205	1857974	-	0.0548691	0.258395	0.612903	0.387097	0	1.34053	0.723394	NA	0.617139
SRCIN1	17	36686258	36762183	-	0.054895	0.258395	0.709677	0.290323	0	3.22213	1.08237	NA	2.13975
TVP23B	17	18684307	18704742	+	0.0549277	0.258395	0.516129	0.419355	0.0645161	1.59285	0.921762	0.782207	0.689694
PNMAL2	19	46994447	46999169	-	0.0549921	0.258395	0.677419	0.322581	0	2.38887	0.723984	NA	1.66488
BCL7B	7	72950682	72971602	-	0.0549939	0.258395	0.645161	0.354839	0	2.01556	1.174	NA	0.841558
TMCC3	12	94960899	95044338	-	0.0551786	0.259019	0.580645	0.419355	0	3.62431	2.11128	NA	1.51303
CACTIN	19	3610625	3626813	-	0.0551963	0.259019	0.612903	0.387097	0	1.56146	0.974294	NA	0.587161
ZNF235	19	44790500	44809178	-	0.0552617	0.259109	0.677419	0.322581	0	2.36387	1.36051	NA	1.00336
LYRM5	12	25348149	25356766	+	0.0552849	0.259109	0.516129	0.483871	0	2.12313	0.661759	NA	1.46137
ABR	17	906757	1083268	-	0.055413	0.259546	0.483871	0.451613	0.0645161	3.19069	2.30642	1.86523	0.939418
CHMP5	9	33264876	33282067	+	0.0555401	0.259713	0.548387	0.387097	0.0645161	2.20992	1.31673	2.08316	0.783699
STON2	14	81726993	81893556	-	0.0555796	0.259713	0.612903	0.387097	0	4.88437	3.01897	NA	1.86541
CCDC126	7	23636997	23684327	+	0.0555882	0.259713	0.709677	0.290323	0	1.48934	0.61704	NA	0.8723
MCF2L	13	113623534	113754053	+	0.0557256	0.259713	0.580645	0.322581	0.0967742	2.21386	1.30099	0.767616	1.03596
XYLT2	17	48423392	48438546	+	0.055729	0.259713	0.709677	0.290323	0	0.529801	-0.259159	NA	0.78896
TJP2	9	71736179	71870124	+	0.0557789	0.259713	0.580645	0.387097	0.0322581	0.861153	0.143351	-1.10587	0.813896
ZNF473	19	50529149	50552033	+	0.0558145	0.259713	0.677419	0.322581	0	2.55563	0.724415	NA	1.83122
ANO4	12	101188373	101522419	+	0.0558255	0.259713	0.580645	0.419355	0	0.261767	-1.08917	NA	1.35094
POU2F2	19	42590261	42636625	-	0.0558355	0.259713	0.677419	0.322581	0	2.67772	1.01523	NA	1.66249
ALKBH1	14	78138748	78174356	-	0.0558834	0.259713	0.612903	0.387097	0	1.97379	1.22195	NA	0.751847
MRFAP1	4	6641817	6644472	+	0.0558906	0.259713	0.580645	0.419355	0	2.61636	1.51222	NA	1.10414
SPDYE2	7	102191678	102202757	+	0.0559117	0.259713	0.612903	0.387097	0	2.07954	1.0954	NA	0.984139
MPP2	17	41952726	41978001	-	0.0559355	0.259713	0.709677	0.290323	0	3.88628	1.28285	NA	2.60343
KCNIP4	4	20730238	21305529	-	0.0559366	0.259713	0.580645	0.419355	0	2.61217	0.939809	NA	1.67236
DACT3	19	47150820	47157914	-	0.0560201	0.259813	0.677419	0.322581	0	3.63653	1.65021	NA	1.98633
ZNF317	19	9251055	9274091	+	0.056037	0.259813	0.612903	0.387097	0	1.5826	1.02904	NA	0.553562
ZNF846	19	9868150	9879410	-	0.0560626	0.259813	0.612903	0.387097	0	2.37142	1.35052	NA	1.02089
CDC37L1	9	4679552	4708399	+	0.0562195	0.260378	0.516129	0.451613	0.0322581	1.50565	0.975275	0.149526	0.585428
C12orf65	12	123717843	123742506	+	0.0563152	0.260659	0.580645	0.419355	0	2.62727	1.75071	NA	0.876556
PDCD2L	19	34895302	34917073	+	0.0563593	0.260701	0.677419	0.322581	0	1.30521	0.0827844	NA	1.22242
PTPN13	4	87515467	87736329	-	0.0564906	0.260923	0.580645	0.419355	0	2.24008	0.854618	NA	1.38546
PTPRB	12	70909650	71003804	-	0.0564934	0.260923	0.580645	0.419355	0	2.97509	1.8385	NA	1.13659
LMAN1	18	56995054	57026508	-	0.0565124	0.260923	0.516129	0.419355	0.0645161	1.13664	0.539289	1.35442	0.488667
PSMD9	12	122326636	122355771	+	0.0565699	0.261027	0.580645	0.419355	0	0.37595	1.44596	NA	-1.07001
ZNF460	19	57791334	57804937	+	0.0566063	0.261034	0.645161	0.354839	0	1.4715	0.64587	NA	0.82563
STXBP2	19	7701986	7712760	+	0.0567972	0.261512	0.645161	0.354839	0	0.718605	0.211411	NA	0.507195
PTOV1	19	50353991	50364001	+	0.0568269	0.261512	0.677419	0.322581	0	2.01234	1.14043	NA	0.871914
SERPINA5	14	95047705	95059457	+	0.0568502	0.261512	0.612903	0.387097	0	-5.38407	-2.47541	NA	-2.90867
NUP210	3	13357729	13461819	-	0.0568505	0.261512	0.16129	0.806452	0.0322581	2.13444	1.21873	1.69804	0.897278
DSCR3	21	38595720	38640409	-	0.0569749	0.261779	0.16129	0.741935	0.0967742	0.639513	0.158968	0.354983	0.457928
SDR39U1	14	24908971	24912007	-	0.0569788	0.261779	0.612903	0.387097	0	2.56795	1.21561	NA	1.35233
RHBDD2	7	75508309	75518244	+	0.0570757	0.261905	0.645161	0.354839	0	2.33838	0.916545	NA	1.42184
MAPK10	4	86933448	87275797	-	0.0570764	0.261905	0.580645	0.419355	0	3.86693	2.21206	NA	1.65487
RIMKLB	12	8834272	8935694	+	0.0571657	0.262153	0.548387	0.451613	0	1.76911	1.01549	NA	0.753622
OSMR	5	38845959	38935743	+	0.057242	0.262214	0.612903	0.387097	0	1.57514	0.365828	NA	1.20931
DNAH17	17	76419777	76573476	-	0.0572739	0.262214	0.645161	0.354839	0	2.56366	1.42951	NA	1.13414
BRF1	14	105675622	105781914	-	0.0572846	0.262214	0.516129	0.483871	0	1.04502	0.56392	NA	0.481099
PPTC7	12	110972236	111021064	+	0.0574015	0.262515	0.580645	0.419355	0	1.4035	0.73124	NA	0.672256
CACNA1B	9	140772240	141019076	+	0.0574207	0.262515	0.580645	0.387097	0.0322581	5.58369	2.98675	7.52242	2.24805
FRMD3	9	85857904	86153348	-	0.0575688	0.26272	0.580645	0.387097	0.0322581	1.15636	-0.164545	-1.08433	1.39165
GALK1	17	73754017	73761280	-	0.0575731	0.26272	0.677419	0.322581	0	-0.725248	0.649978	NA	-1.37523
MYL9	20	35169886	35178226	+	0.0576566	0.26272	0.677419	0.322581	0	2.57258	1.4785	NA	1.09408
ZNF841	19	52567718	52599018	-	0.0576719	0.26272	0.677419	0.322581	0	2.13176	0.739456	NA	1.39231
RPS26	12	56435685	56438007	+	0.0577021	0.26272	0.580645	0.419355	0	0.179464	0.804121	NA	-0.624658
TMED10	14	75598170	75643349	-	0.0577125	0.26272	0.612903	0.387097	0	0.558221	-0.164749	NA	0.72297
PI4K2B	4	25235652	25280831	+	0.05782	0.263049	0.580645	0.419355	0	0.860431	1.45109	NA	-0.590657
IGFBPL1	9	38406524	38424444	-	0.0578998	0.263122	0.580645	0.387097	0.0322581	4.43269	2.22587	3.65676	2.09676
LIN7A	12	81186298	81331694	-	0.0579205	0.263122	0.580645	0.419355	0	4.43568	2.91028	NA	1.5254
PTTG1IP	21	46269499	46293818	+	0.0579419	0.263122	0.16129	0.741935	0.0967742	1.7189	1.16302	1.00757	0.573812
EXD2	14	69658193	69710737	+	0.0580744	0.26354	0.612903	0.387097	0	0.76228	0.273521	NA	0.488759
RAD51C	17	56769933	56772741	+	0.0581122	0.26354	0.677419	0.322581	0	1.90285	1.226	NA	0.67684
WBP2	17	73841779	73851501	-	0.05814	0.26354	0.677419	0.322581	0	0.23044	1.33629	NA	-1.10585
DPM2	9	130697373	130700763	-	0.0581951	0.263629	0.612903	0.354839	0.0322581	0.756205	0.248457	-0.899201	0.603387
CLIP1	12	122755980	122907116	-	0.0582628	0.263775	0.580645	0.419355	0	1.36507	0.787877	NA	0.577195
PPP1R9A	7	94536948	94925727	-	0.0584026	0.264088	0.645161	0.354839	0	1.10427	0.31074	NA	0.793526
TBXA2R	19	3594503	3606831	-	0.0584748	0.264232	0.612903	0.387097	0	3.3124	2.27502	NA	1.03738
ACTR3B	7	152456833	152552464	+	0.0585558	0.264232	0.645161	0.354839	0	0.995812	0.403765	NA	0.592047
GPR180	13	95254103	95286899	+	0.058566	0.264232	0.580645	0.322581	0.0967742	1.99049	1.40423	1.10501	0.655312
ZNF862	7	149535455	149564568	+	0.0586723	0.264232	0.645161	0.354839	0	1.62611	0.702597	NA	0.923515
DMPK	19	46272966	46282877	-	0.0586998	0.264232	0.677419	0.322581	0	0.757176	0.0149686	NA	0.742207
ZNF554	19	2819871	2836733	+	0.0587355	0.264232	0.612903	0.387097	0	1.5437	0.92542	NA	0.61828
MCCC2	5	70883114	70954531	+	0.0587798	0.264232	0.612903	0.387097	0	0.246085	-0.845418	NA	1.0915
NUFIP1	13	45513383	45563613	-	0.0588526	0.264232	0.580645	0.322581	0.0967742	1.22299	0.671144	-0.290853	0.773848
SKA3	13	21727733	21750741	-	0.05886	0.264232	0.580645	0.322581	0.0967742	3.23923	1.68397	2.28107	1.41747
GOLPH3	5	32124823	32174425	-	0.0588742	0.264232	0.612903	0.387097	0	1.14872	0.743861	NA	0.404862
ZC3H14	14	89029252	89079853	+	0.0589726	0.264232	0.612903	0.387097	0	1.23459	0.848093	NA	0.386497
KCNA6	12	4918341	4960278	+	0.0589811	0.264232	0.548387	0.451613	0	4.8132	2.31343	NA	2.49977
CHSY3	5	129240522	129522327	+	0.0589896	0.264232	0.612903	0.387097	0	2.69826	1.60983	NA	1.08843
NOA1	4	57829509	57843826	-	0.059013	0.264232	0.612903	0.387097	0	-0.237649	0.178343	NA	-0.415992
GLCCI1	7	8008373	8128710	+	0.0590143	0.264232	0.645161	0.354839	0	3.07671	1.77292	NA	1.30379
LIMA1	12	50569562	50595316	-	0.0590373	0.264232	0.645161	0.354839	0	1.46955	0.512872	NA	0.95668
PIP4K2B	17	36921943	36956158	-	0.059076	0.264246	0.709677	0.290323	0	2.16973	1.04665	NA	1.12308
ZNF44	19	12382622	12405714	-	0.0591612	0.264382	0.612903	0.387097	0	1.80746	0.95957	NA	0.847891
CYP27B1	12	58156116	58160976	-	0.0592238	0.264382	0.612903	0.387097	0	-2.34736	-1.51642	NA	-0.830938
NFIL3	9	94171326	94186144	-	0.0592482	0.264382	0.580645	0.387097	0.0322581	0.792653	-0.00972996	-3.60186	1.0787
NARF	17	80416059	80446143	+	0.0594426	0.265009	0.645161	0.354839	0	2.1825	1.34802	NA	0.834477
KSR2	12	117890816	118406028	-	0.0594598	0.265009	0.580645	0.419355	0	3.16503	1.48442	NA	1.68061
FAM221A	7	23719732	23742269	+	0.0595517	0.26526	0.709677	0.290323	0	0.166814	-0.439012	NA	0.605826
IMMP2L	7	110303105	111202347	-	0.0596212	0.265347	0.645161	0.354839	0	0.960286	0.364988	NA	0.595298
SHROOM3	4	77356252	77704406	+	0.0596425	0.265347	0.612903	0.387097	0	1.74166	0.400285	NA	1.34138
PEX12	17	33901813	33905656	-	0.0596939	0.265417	0.709677	0.290323	0	1.57549	0.925937	NA	0.649552
MMAA	4	146540539	146581187	+	0.0597532	0.265522	0.612903	0.387097	0	1.34383	0.453142	NA	0.890684
TGFBR1	9	101867370	101916474	+	0.0598001	0.265572	0.548387	0.387097	0.0645161	1.93632	0.897286	0.51306	1.09392
MIER2	19	305574	344841	-	0.0598852	0.265672	0.612903	0.387097	0	1.22558	0.652073	NA	0.573505
CHGA	14	93389444	93401638	+	0.0598938	0.265672	0.612903	0.387097	0	4.7019	2.03424	NA	2.66765
AGTPBP1	9	88161453	88356944	-	0.0600046	0.265814	0.580645	0.387097	0.0322581	1.39753	0.640451	0.966539	0.731993
COL4A3BP	5	74666927	74807454	-	0.0600329	0.265814	0.645161	0.354839	0	2.02471	1.19792	NA	0.826791
ATP2B2	3	10365706	10547268	-	0.0600896	0.265895	0.16129	0.806452	0.0322581	6.1622	3.65104	-0.44155	2.66857
XPA	9	100437190	100459691	-	0.0601493	0.265895	0.548387	0.387097	0.0645161	0.846588	0.309265	-0.116842	0.598196
FBXW5	9	139834884	139839206	-	0.0601605	0.265895	0.580645	0.387097	0.0322581	0.596579	0.239089	-0.778791	0.435789
SEMA5A	5	9035137	9546233	-	0.0601938	0.265895	0.612903	0.387097	0	2.4733	0.954402	NA	1.5189
MED13L	12	116396380	116714991	-	0.0603987	0.266642	0.580645	0.419355	0	0.650493	-0.132529	NA	0.783022
NPHS1	19	36316273	36342895	-	0.0605425	0.267118	0.677419	0.322581	0	-4.41008	-2.23908	NA	-2.17101
PTPN3	9	112137973	112213664	+	0.0607031	0.267554	0.580645	0.387097	0.0322581	0.473009	-0.1653	-0.85684	0.691504
CORO1C	12	109038884	109096774	-	0.0607131	0.267554	0.516129	0.483871	0	2.17386	1.33222	NA	0.841638
B4GALT6	18	29200998	29264686	-	0.060808	0.267814	0.580645	0.354839	0.0645161	3.4101	2.04912	2.22173	1.33442
ZNF701	19	53073525	53090427	+	0.0608907	0.26802	0.677419	0.322581	0	1.26985	-0.720957	NA	1.99081
LENG1	19	54659376	54663481	-	0.060944	0.268096	0.677419	0.322581	0	1.71878	1.08952	NA	0.62926
AK1	9	130628758	130635827	-	0.0611623	0.26838	0.612903	0.354839	0.0322581	2.48813	1.70791	2.36068	0.725818
AGR2	7	16832263	16844738	-	0.0612341	0.26838	0.645161	0.354839	0	-2.29129	-4.99608	NA	2.7048
SERPINF2	17	1646129	1658559	+	0.0612463	0.26838	0.483871	0.451613	0.0645161	2.68401	1.01052	1.93584	1.55783
ZBTB49	4	4291923	4323513	+	0.0612838	0.26838	0.580645	0.419355	0	1.2466	0.635184	NA	0.611412
CTTNBP2	7	117350704	117513561	-	0.0612906	0.26838	0.645161	0.354839	0	0.357684	-1.2528	NA	1.61048
STK35	20	2082527	2129201	+	0.0613285	0.26838	0.709677	0.258065	0.0322581	1.51412	0.408772	1.06444	1.0325
TRPV3	17	3413795	3461289	-	0.0613327	0.26838	0.483871	0.451613	0.0645161	1.54476	0.220908	0.743869	1.25848
C19orf25	19	1473199	1479228	-	0.0614267	0.268633	0.612903	0.387097	0	1.74732	1.20343	NA	0.543893
GALNT12	9	101569980	101612363	+	0.0615031	0.26881	0.548387	0.387097	0.0645161	0.426592	-0.242683	-1.4358	0.839721
ZC3HAV1L	7	138710451	138720775	-	0.0615925	0.269043	0.645161	0.354839	0	3.26329	2.15827	NA	1.10502
ZNF12	7	6728063	6746566	-	0.0616514	0.269047	0.645161	0.354839	0	1.79693	1.18409	NA	0.612843
SPSB2	12	6980098	6982449	-	0.0616861	0.269047	0.580645	0.419355	0	1.66763	0.722589	NA	0.945043
SIMC1	5	175665361	175772994	+	0.0617454	0.269047	0.612903	0.387097	0	2.18023	1.49874	NA	0.681487
PTPRM	18	7567313	8406859	-	0.0617623	0.269047	0.548387	0.387097	0.0645161	2.00087	1.06207	1.06624	0.938204
POLR3G	5	89770680	89810369	+	0.0617739	0.269047	0.645161	0.354839	0	1.3412	2.70516	NA	-1.36396
ZCCHC3	20	278203	280965	+	0.0619587	0.269694	0.677419	0.290323	0.0322581	1.99703	1.25107	0.827922	0.788271
TMEM128	4	4237268	4249969	-	0.0622008	0.270372	0.580645	0.419355	0	1.45432	0.803086	NA	0.65123
ZDHHC4	7	6617064	6628610	+	0.0622311	0.270372	0.645161	0.354839	0	0.565874	0.993048	NA	-0.427174
DDX24	14	94517267	94547558	-	0.0622581	0.270372	0.612903	0.387097	0	2.43282	1.53099	NA	0.901832
ZNF132	19	58944180	58951589	-	0.0622597	0.270372	0.645161	0.354839	0	2.61578	1.4124	NA	1.20337
ZNF420	19	37569123	37621269	+	0.0623678	0.270684	0.677419	0.322581	0	-0.530689	1.34441	NA	-1.8751
MYL5	4	671710	675817	+	0.0625724	0.271327	0.612903	0.387097	0	1.83939	0.855017	NA	0.984375
LAMP1	13	113951468	113977741	+	0.0625888	0.271327	0.580645	0.322581	0.0967742	0.784053	0.505344	-0.320246	0.46923
MORN3	12	122089292	122107560	-	0.0626465	0.27142	0.580645	0.419355	0	1.80903	0.571316	NA	1.23771
RALGPS1	9	129677052	129940810	+	0.0627212	0.271585	0.548387	0.419355	0.0322581	2.59561	1.42873	2.71471	1.07503
PPP1R13L	19	45882891	45908312	-	0.0627652	0.271618	0.677419	0.322581	0	-0.311823	0.483993	NA	-0.795816
PWP2	21	45527207	45551063	-	0.062862	0.27183	0.16129	0.741935	0.0967742	1.23989	0.658005	0.0610617	0.650764
C9orf169	9	140119643	140120763	+	0.0628872	0.27183	0.580645	0.387097	0.0322581	4.00839	2.23754	3.38234	1.68279
PRSS1	7	142457318	142460927	-	0.0630398	0.272332	0.645161	0.354839	0	-11.1616	-8.14144	NA	-3.0202
PALM2	9	112403067	112713756	+	0.0630891	0.272387	0.580645	0.387097	0.0322581	3.30336	2.06022	4.00231	1.09374
ZNF324B	19	58962970	58969199	+	0.063183	0.272635	0.645161	0.354839	0	1.16336	-0.266526	NA	1.42989
NR3C2	4	148999914	149363672	-	0.0632381	0.272714	0.580645	0.419355	0	0.204756	-1.15134	NA	1.35609
MLLT3	9	20341662	20621986	-	0.0633555	0.273063	0.548387	0.387097	0.0645161	2.91654	1.90563	2.45863	0.931906
FOXS1	20	30432102	30433420	-	0.0636851	0.274324	0.677419	0.322581	0	5.4856	3.68532	NA	1.80028
CST3	20	23608533	23618685	-	0.0637993	0.274647	0.709677	0.258065	0.0322581	0.729762	-0.0612339	-2.04245	1.01113
PDGFRB	5	149493401	149535422	-	0.0639719	0.274647	0.580645	0.387097	0.0322581	2.81465	1.42182	2.27709	1.32705
TROAP	12	49716970	49718171	+	0.0640462	0.274647	0.645161	0.354839	0	2.91158	1.84954	NA	1.06204
PET112	4	152591808	152682175	-	0.0640507	0.274647	0.516129	0.483871	0	1.40336	0.294223	NA	1.10913
SERPINE3	13	51915167	51936239	+	0.0641663	0.274647	0.580645	0.322581	0.0967742	-0.0214127	1.24775	-0.122944	-0.952847
ZNF493	19	21579920	21591601	+	0.0642163	0.274647	0.645161	0.354839	0	0.451523	1.14151	NA	-0.689988
CCDC97	19	41816067	41830788	+	0.0642245	0.274647	0.677419	0.322581	0	1.65132	0.976461	NA	0.674861
CASC1	12	25261222	25348096	-	0.0642474	0.274647	0.516129	0.483871	0	2.25056	1.01584	NA	1.23472
GLRX	5	95149552	95158577	-	0.064253	0.274647	0.612903	0.387097	0	2.90997	1.75909	NA	1.15088
LDLR	19	11200037	11244506	+	0.064258	0.274647	0.645161	0.354839	0	-1.43474	-0.320032	NA	-1.1147
CLCN2	3	184063972	184079439	-	0.0642659	0.274647	0.16129	0.774194	0.0645161	1.51311	0.346729	0.151849	1.18137
PHYHD1	9	131683173	131704320	+	0.0642679	0.274647	0.580645	0.387097	0.0322581	-2.56789	-0.681639	-2.90872	-1.71494
GRB7	17	37894153	37903538	+	0.0642822	0.274647	0.677419	0.322581	0	0.378689	-0.677358	NA	1.05605
TMEM253	14	21567095	21571883	+	0.0642947	0.274647	0.612903	0.387097	0	1.64124	0.718145	NA	0.923091
THAP5	7	108202587	108209897	-	0.0643495	0.274647	0.645161	0.354839	0	1.65399	0.885308	NA	0.768682
VSTM2A	7	54610017	54620224	+	0.0643498	0.274647	0.645161	0.354839	0	2.81599	0.430911	NA	2.38508
PCSK2	20	17206751	17465223	+	0.0644199	0.274789	0.709677	0.258065	0.0322581	5.13636	0.686903	5.94475	3.86525
MAPKAPK5	12	112280031	112331228	+	0.0645062	0.275	0.483871	0.516129	0	1.27807	0.811484	NA	0.466586
PGS1	17	76374698	76420740	+	0.0646899	0.275522	0.645161	0.354839	0	1.91195	0.997308	NA	0.914647
NUPL1	13	25875665	25916561	+	0.0647259	0.275522	0.580645	0.322581	0.0967742	1.66257	0.793344	0.236288	0.99778
ATXN2	12	111890017	112037477	-	0.0647742	0.275522	0.483871	0.516129	0	2.06886	1.3631	NA	0.705767
RTTN	18	67671039	67872962	-	0.0648011	0.275522	0.516129	0.419355	0.0645161	1.85121	1.25441	1.3414	0.585196
PGM5	9	70971814	71145977	+	0.0648135	0.275522	0.580645	0.387097	0.0322581	2.50512	1.23083	1.44463	1.25785
PACRGL	4	20697904	20754523	+	0.0648525	0.275531	0.580645	0.419355	0	2.07808	1.30185	NA	0.776239
C9orf96	9	136243283	136271220	+	0.0649008	0.275579	0.612903	0.354839	0.0322581	1.22748	0.502858	-1.04691	0.853772
MPLKIP	7	40172341	40174251	-	0.0649451	0.27561	0.645161	0.354839	0	1.82861	0.99642	NA	0.832194
CSNK1D	17	80200536	80231594	-	0.0651897	0.276375	0.645161	0.354839	0	0.887148	-0.457593	NA	1.34474
MEIS3	19	47906374	47922785	-	0.0651996	0.276375	0.677419	0.322581	0	4.95947	2.54463	NA	2.41484
BPTF	17	65821779	65980494	+	0.0653416	0.27682	0.677419	0.322581	0	2.16662	1.2594	NA	0.907217
PCDHB13	5	140593490	140596993	+	0.065504	0.277214	0.580645	0.419355	0	2.29061	1.10673	NA	1.18388
SOX9	17	70117160	70122561	+	0.065509	0.277214	0.677419	0.322581	0	-2.65808	-1.11259	NA	-1.5455
FST	5	52776263	52782304	+	0.0655629	0.277265	0.580645	0.419355	0	3.21738	1.11957	NA	2.0978
MDM1	12	68688345	68726161	-	0.0655956	0.277265	0.645161	0.354839	0	1.85452	1.08468	NA	0.769841
ADRM1	20	60877951	60883918	+	0.0656418	0.277288	0.677419	0.322581	0	1.09214	0.598284	NA	0.493858
FBXO10	9	37510888	37576250	-	0.0656754	0.277288	0.580645	0.387097	0.0322581	1.18238	0.496517	2.13793	0.559606
NLK	17	26369687	26523407	+	0.0659305	0.278076	0.677419	0.290323	0.0322581	1.17583	0.449601	0.581414	0.713052
RMI1	9	86595636	86618989	+	0.0659367	0.278076	0.580645	0.387097	0.0322581	1.29393	0.472869	1.9826	0.704928
COPG2	7	130146078	130353598	-	0.0660045	0.278205	0.612903	0.387097	0	1.83184	1.20669	NA	0.625143
USP53	4	120133781	120216673	+	0.066255	0.278825	0.580645	0.419355	0	0.429237	-0.371502	NA	0.800738
VIPR2	7	158820865	158889895	-	0.0662678	0.278825	0.645161	0.354839	0	-5.64911	-3.60622	NA	-2.0429
RANBP3	19	5916149	5978320	-	0.0663082	0.278825	0.645161	0.354839	0	0.15982	1.02403	NA	-0.864212
GNG8	19	47137332	47137939	-	0.0663147	0.278825	0.677419	0.322581	0	2.32144	0.2362	NA	2.08524
SPTB	14	65213000	65289866	-	0.0663387	0.278825	0.612903	0.387097	0	2.85738	1.41012	NA	1.44726
GNG10	9	114423850	114432526	+	0.0664819	0.279039	0.580645	0.387097	0.0322581	1.69382	0.208479	0.922515	1.43042
TRIM13	13	50571142	50592603	+	0.0665054	0.279039	0.548387	0.354839	0.0967742	0.928913	0.181735	-3.2573	1.48412
FAM220A	7	6369039	6388590	-	0.0665183	0.279039	0.645161	0.354839	0	1.30995	0.882072	NA	0.427881
BET1	7	93592081	93633694	-	0.0665396	0.279039	0.645161	0.354839	0	0.455097	-0.303223	NA	0.75832
C9orf91	9	117373485	117408702	+	0.0665978	0.279126	0.548387	0.419355	0.0322581	1.12682	0.685469	0.425294	0.459935
C19orf54	19	41246760	41255828	-	0.0666598	0.279229	0.677419	0.322581	0	1.36582	0.792878	NA	0.572945
SUPT6H	17	26989215	27029702	+	0.066814	0.279624	0.709677	0.258065	0.0322581	1.84087	1.04302	1.47205	0.75018
SPOCK3	4	167654534	168155577	-	0.0668292	0.279624	0.516129	0.483871	0	4.29465	1.87224	NA	2.42241
ANP32B	9	100745488	100778225	+	0.0670037	0.279725	0.548387	0.387097	0.0645161	0.87584	0.498737	-0.170904	0.472767
CHD3	17	7788122	7816075	+	0.0670051	0.279725	0.516129	0.419355	0.0645161	1.49645	0.782502	0.427555	0.761269
KCNH8	3	19190016	19577135	+	0.0670437	0.279725	0.16129	0.806452	0.0322581	2.649	1.14801	-2.0016	1.62213
SERPINA4	14	95027756	95036250	+	0.0670527	0.279725	0.612903	0.387097	0	-6.08269	-3.45685	NA	-2.62584
SIGLEC12	19	51994480	52003647	-	0.0670785	0.279725	0.677419	0.322581	0	1.81145	3.21398	NA	-1.40253
TEKT3	17	15207128	15244958	-	0.0671692	0.279841	0.516129	0.419355	0.0645161	1.60393	-0.171885	2.47288	1.42318
AGFG2	7	100136833	100165843	+	0.0671813	0.279841	0.645161	0.354839	0	1.83464	0.969314	NA	0.865326
THAP2	12	72057676	72074428	+	0.0672661	0.280037	0.580645	0.419355	0	1.9307	1.04821	NA	0.882492
FRMPD1	9	37651051	37746901	+	0.0673656	0.280295	0.580645	0.387097	0.0322581	2.58539	1.44914	0.910693	1.17767
FAM160A1	4	152330397	152584784	+	0.0674271	0.280394	0.516129	0.483871	0	-3.58709	-2.49937	NA	-1.08772
HDAC7	12	48176492	48213763	-	0.067629	0.281077	0.645161	0.354839	0	1.6049	0.620191	NA	0.984706
PLD3	19	40854331	40884397	+	0.0676921	0.28111	0.677419	0.322581	0	2.74016	1.12823	NA	1.61192
AMACR	5	33987090	34008220	-	0.0677234	0.28111	0.612903	0.387097	0	2.23606	1.41725	NA	0.818819
ZFP64	20	50700549	50808524	-	0.0677583	0.28111	0.677419	0.322581	0	1.96791	1.32598	NA	0.641925
NOM1	7	156742416	156765876	+	0.0678183	0.28111	0.645161	0.354839	0	1.14755	0.430676	NA	0.71687
CCBE1	18	57098170	57364644	-	0.0678632	0.28111	0.516129	0.419355	0.0645161	1.33891	-0.276812	-0.916645	1.70103
ZNF714	19	21264952	21307897	+	0.0679583	0.281219	0.645161	0.354839	0	1.84366	1.12998	NA	0.713683
NIPBL	5	36876860	37065921	+	0.0680053	0.28123	0.645161	0.354839	0	1.24457	1.68832	NA	-0.44375
ATP11A	13	113344642	113541482	+	0.0681099	0.281506	0.580645	0.322581	0.0967742	1.09148	0.520952	-1.13031	0.951591
ALG1	16	5121809	5137380	+	0.06828	0.282052	0.16129	0.83871	0	1.07113	0.263664	NA	0.807466
PHB	17	47481409	47492220	-	0.0683815	0.282315	0.709677	0.290323	0	1.75156	1.24601	NA	0.505549
HAP1	17	39878890	39890898	-	0.0684736	0.282539	0.709677	0.290323	0	3.88721	1.09393	NA	2.79329
ZNF304	19	57862641	57871266	+	0.0685323	0.282625	0.645161	0.354839	0	2.13831	1.16063	NA	0.977678
SYNGR2	17	76164625	76169009	+	0.0686359	0.282895	0.645161	0.354839	0	-0.0305263	1.4796	NA	-1.51012
MUM1	19	1354975	1378430	+	0.0687766	0.283319	0.612903	0.387097	0	1.94166	0.128077	NA	1.81358
ERCC6L2	9	98637899	98731122	+	0.0688632	0.283519	0.548387	0.387097	0.0645161	1.85369	1.29998	0.87148	0.61493
INTU	4	128554086	128637934	+	0.0691015	0.283985	0.580645	0.419355	0	2.63385	1.44566	NA	1.18819
BHLHE41	12	26272958	26278003	-	0.0691113	0.283985	0.516129	0.483871	0	1.35701	0.296158	NA	1.06085
ARL4D	17	41476352	41478504	+	0.0691149	0.283985	0.709677	0.290323	0	3.79651	2.37791	NA	1.4186
AKAP8L	19	15490858	15529932	-	0.0691289	0.283985	0.645161	0.354839	0	1.69704	1.02461	NA	0.672425
PCDHA11	5	140247097	140391929	+	0.069171	0.284001	0.580645	0.419355	0	0.443245	-1.12356	NA	1.56681
DNAJC25	9	114393631	114416631	+	0.0692538	0.284185	0.580645	0.387097	0.0322581	1.71171	1.05959	0.946309	0.66083
CDK12	17	37617763	37690818	+	0.0693485	0.284417	0.677419	0.322581	0	1.63359	0.954878	NA	0.678716
TWF1	12	44187525	44200178	-	0.0694368	0.284622	0.645161	0.354839	0	0.391559	1.41381	NA	-1.02225
CDADC1	13	49822046	49867622	+	0.0695686	0.284889	0.580645	0.322581	0.0967742	2.06203	1.54385	0.26951	0.812256
CXXC5	5	139026883	139063470	+	0.0695784	0.284889	0.612903	0.387097	0	-0.144633	0.522787	NA	-0.66742
FAM110A	20	814339	826922	+	0.0696621	0.284998	0.709677	0.258065	0.0322581	2.46706	1.57515	1.51614	0.898463
TTLL5	14	76127550	76421425	+	0.0696887	0.284998	0.612903	0.387097	0	1.10411	1.82813	NA	-0.724023
B3GALT5	21	40984866	41034816	+	0.0697468	0.284998	0.16129	0.741935	0.0967742	1.05637	-0.484637	0.738122	1.39992
TRAM1L1	4	118004709	118006736	-	0.0697595	0.284998	0.580645	0.419355	0	2.63913	1.5013	NA	1.13783
CUX2	12	111471827	111788358	+	0.0697963	0.284998	0.580645	0.419355	0	1.22125	4.06947	NA	-2.84822
CCNI	4	77969164	77996063	-	0.0698598	0.285101	0.612903	0.387097	0	1.20967	0.515981	NA	0.693687
CSE1L	20	47662782	47713497	+	0.0699489	0.285217	0.677419	0.322581	0	1.07218	0.586688	NA	0.485496
ARL9	4	57371374	57390058	+	0.069988	0.285217	0.612903	0.387097	0	2.61429	1.59295	NA	1.02134
MLXIPL	7	73007523	73038870	-	0.0700669	0.285217	0.645161	0.354839	0	3.19944	1.61285	NA	1.58659
GPCPD1	20	5525079	5591672	-	0.0700746	0.285217	0.709677	0.258065	0.0322581	1.61936	0.785996	0.102678	0.909285
MALT1	18	56338617	56417371	+	0.0700794	0.285217	0.516129	0.419355	0.0645161	1.55759	0.772716	1.2049	0.727246
SOX30	5	157052686	157079428	-	0.0702393	0.285555	0.580645	0.387097	0.0322581	2.37121	1.04881	0.988984	1.32701
ACOT4	14	74058409	74062470	+	0.0702847	0.285584	0.612903	0.387097	0	1.2871	1.99104	NA	-0.70394
PRELID1	5	176730762	176733960	-	0.070377	0.285804	0.612903	0.387097	0	-0.549364	0.739261	NA	-1.28863
TEX2	17	62224792	62308116	-	0.070433	0.285875	0.645161	0.354839	0	0.26324	0.699895	NA	-0.436654
RAD50	5	131892615	131980313	+	0.0705994	0.286394	0.612903	0.387097	0	1.31391	0.711173	NA	0.602735
ABCA7	19	1040101	1065571	+	0.0707787	0.286966	0.612903	0.387097	0	1.95131	1.08902	NA	0.862281
CHIC2	4	54875955	54930815	-	0.0709069	0.287329	0.612903	0.387097	0	1.50114	0.935619	NA	0.565519
FAM200B	4	15683351	15692070	+	0.0709893	0.287423	0.580645	0.419355	0	1.81743	0.244922	NA	1.57251
MEX3C	18	48700919	48724051	-	0.0710073	0.287423	0.516129	0.419355	0.0645161	1.36105	0.879947	0.499527	0.531827
PHKG1	7	56147975	56160689	-	0.0710713	0.287514	0.645161	0.354839	0	1.68482	0.542292	NA	1.14253
NDRG2	14	21484921	21539031	-	0.0711441	0.287514	0.612903	0.387097	0	0.0943297	1.45125	NA	-1.35692
CD180	5	66478102	66492617	-	0.0711455	0.287514	0.580645	0.419355	0	2.31833	3.71889	NA	-1.40056
UNC13D	17	73823305	73840798	-	0.0711973	0.287568	0.677419	0.322581	0	0.432647	1.33881	NA	-0.906167
GRASP	12	52400728	52409673	+	0.0712706	0.287606	0.645161	0.354839	0	1.37917	0.68722	NA	0.691947
ACTB	7	5566778	5570232	-	0.0713224	0.287606	0.645161	0.354839	0	3.01639	1.18955	NA	1.82683
CEP170B	14	105331649	105363107	+	0.0713226	0.287606	0.612903	0.387097	0	0.634139	0.0229351	NA	0.611204
ADAM11	17	42836546	42859214	+	0.0715121	0.288155	0.677419	0.322581	0	2.45268	0.43112	NA	2.02156
MLH1	3	37034840	37092337	+	0.071548	0.288155	0.16129	0.806452	0.0322581	1.40823	0.929675	0.263369	0.504178
MYO9B	19	17186590	17324104	+	0.0715786	0.288155	0.645161	0.354839	0	1.81453	0.698219	NA	1.11631
METTL20	12	31800093	31819151	+	0.0716134	0.288155	0.580645	0.419355	0	0.8113	0.11994	NA	0.69136
ULK1	12	132379278	132407707	+	0.0717009	0.288347	0.580645	0.419355	0	0.575226	-0.238287	NA	0.813513
MND1	4	154265800	154336247	+	0.0717386	0.288347	0.516129	0.483871	0	0.382433	1.56357	NA	-1.18114
APPBP2	17	58520509	58603601	-	0.0718352	0.28858	0.677419	0.322581	0	1.57545	0.80555	NA	0.769897
RAD9B	12	110940004	110969891	+	0.0718829	0.288616	0.580645	0.419355	0	1.51938	-0.0752786	NA	1.59466
SEC24B	4	110354870	110461615	+	0.0719983	0.288924	0.580645	0.419355	0	0.922583	0.57995	NA	0.342634
C7orf55	7	139024202	139029736	+	0.0723071	0.290007	0.645161	0.354839	0	1.52074	0.917555	NA	0.60318
STK32A	5	146614578	146728393	+	0.0724556	0.290446	0.580645	0.419355	0	1.15692	-0.291715	NA	1.44863
ZNF217	20	52183609	52199636	-	0.0726055	0.29089	0.677419	0.322581	0	0.769268	-0.074981	NA	0.844249
GCNT1	9	79056581	79122332	+	0.0727126	0.291163	0.548387	0.419355	0.0322581	3.8438	1.86864	6.97975	1.61009
C4orf47	4	186350487	186370982	+	0.0727592	0.291193	0.548387	0.451613	0	2.0166	0.861197	NA	1.1554
HDGFRP2	19	4472192	4502232	+	0.0728461	0.291242	0.645161	0.354839	0	1.64383	1.15897	NA	0.484854
GIMAP5	7	150434435	150440737	+	0.0728496	0.291242	0.645161	0.354839	0	1.49581	2.35377	NA	-0.85796
SCAMP4	19	1905212	1926016	+	0.0731304	0.292208	0.612903	0.387097	0	2.50805	0.606104	NA	1.90195
RARA	17	38465422	38513895	+	0.0731955	0.292311	0.709677	0.290323	0	2.12883	1.06478	NA	1.06405
RAN	12	131356538	131362223	+	0.073385	0.292786	0.580645	0.419355	0	2.05959	1.15144	NA	0.908141
CCDC94	19	4247066	4269090	+	0.073393	0.292786	0.612903	0.387097	0	1.04911	0.633507	NA	0.415606
RAB40B	17	80614942	80656598	-	0.073751	0.293818	0.645161	0.354839	0	1.32536	0.510149	NA	0.815208
ZNF594	17	5082830	5095178	-	0.0737528	0.293818	0.483871	0.451613	0.0645161	2.76892	2.06316	1.25056	0.80733
TRA2A	7	23544398	23571660	-	0.0737699	0.293818	0.709677	0.290323	0	1.31653	0.628413	NA	0.688119
SGSM2	17	2240805	2284348	+	0.0738695	0.294058	0.483871	0.451613	0.0645161	1.60271	0.804264	-0.438702	0.953814
POLE3	9	116169514	116172955	-	0.0741752	0.294952	0.580645	0.387097	0.0322581	1.16479	0.76461	-0.581532	0.503731
CMYA5	5	78985658	79096049	+	0.0742128	0.294952	0.645161	0.354839	0	1.82024	0.324764	NA	1.49548
TMPPE	3	33131907	33138293	-	0.0745164	0.295839	0.16129	0.806452	0.0322581	1.73441	0.785582	0.635466	0.9546
HELB	12	66696324	66731992	+	0.0745529	0.295839	0.580645	0.419355	0	0.631507	1.488	NA	-0.856491
RILP	17	1549443	1553392	-	0.0745949	0.295839	0.483871	0.451613	0.0645161	-0.91819	-0.0407573	0.145014	-0.900654
TESK1	9	35605280	35610038	+	0.074713	0.295979	0.580645	0.387097	0.0322581	1.68903	0.619532	0.0210402	1.11553
DPY19L1	7	34968492	35077653	-	0.0747488	0.295979	0.612903	0.387097	0	2.50315	1.6473	NA	0.855854
FKBP9	7	32997015	33046543	+	0.0747719	0.295979	0.612903	0.387097	0	2.1862	1.1104	NA	1.0758
FKBP10	17	39968961	39979469	+	0.074789	0.295979	0.709677	0.290323	0	0.886961	2.05739	NA	-1.17043
ILVBL	19	15225784	15236610	-	0.0748582	0.296095	0.645161	0.354839	0	1.23196	0.771231	NA	0.460728
CHMP4B	20	32399109	32442173	+	0.0750198	0.296451	0.709677	0.290323	0	1.49337	0.887243	NA	0.606129
PCDHB10	5	140571951	140575213	+	0.0750481	0.296451	0.580645	0.419355	0	3.49768	2.09598	NA	1.40169
TPCN1	12	113659242	113736390	+	0.0750884	0.296451	0.580645	0.419355	0	1.41425	0.568157	NA	0.846088
CNTN1	12	41086243	41366519	+	0.0751353	0.296451	0.612903	0.387097	0	4.32772	1.54455	NA	2.78317
TDRP	8	439789	494845	-	0.0751472	0.296451	0.16129	0.774194	0.0645161	2.57341	1.3995	2.17022	1.11463
RAB31	18	9708227	9862553	+	0.075445	0.297273	0.548387	0.387097	0.0645161	3.42628	1.71086	3.35978	1.47986
TANC2	17	61086897	61505067	+	0.0755242	0.297273	0.677419	0.322581	0	2.59718	1.39465	NA	1.20252
ZNF571	19	38055154	38085647	-	0.0755979	0.297273	0.677419	0.322581	0	2.3359	1.33001	NA	1.00589
FASTKD5	20	3127164	3140532	-	0.0755979	0.297273	0.709677	0.258065	0.0322581	1.56132	0.826027	0.800686	0.738104
PPP2R2B	5	145969066	146258348	-	0.0756159	0.297273	0.580645	0.419355	0	3.92996	2.46191	NA	1.46806
PRR24	19	47778141	47778980	-	0.0756186	0.297273	0.677419	0.322581	0	0.946336	0.101411	NA	0.844925
NDNF	4	121956781	121993673	-	0.0756685	0.297273	0.580645	0.419355	0	3.06465	1.08316	NA	1.98149
QDPR	4	17488015	17513857	+	0.0757393	0.297273	0.580645	0.419355	0	0.956508	2.06135	NA	-1.10484
ATXN7L3B	12	74931550	74935232	+	0.0757639	0.297273	0.580645	0.419355	0	1.62328	1.08585	NA	0.537432
BBS9	7	33168896	33645680	+	0.0757977	0.297273	0.645161	0.354839	0	2.14757	1.30104	NA	0.846526
TRIM28	19	59055835	59062082	+	0.075817	0.297273	0.645161	0.354839	0	0.33869	0.896248	NA	-0.557558
POLD1	19	50887579	50921275	+	0.0758561	0.297273	0.677419	0.322581	0	1.37763	0.682527	NA	0.695101
COL4A2	13	110959613	111165556	+	0.0758741	0.297273	0.580645	0.322581	0.0967742	3.60785	2.91282	2.01704	0.901747
NBEA	13	35516423	36246873	+	0.0760187	0.297398	0.580645	0.322581	0.0967742	2.87837	1.54043	2.53581	1.10824
IGFBP3	7	45951843	45960871	-	0.0760706	0.297398	0.645161	0.354839	0	4.97872	3.63101	NA	1.34771
WDR5	9	137001209	137025094	+	0.076074	0.297398	0.612903	0.354839	0.0322581	1.38353	-0.253165	-0.904533	1.69097
RPS15	19	1438362	1440496	+	0.0760939	0.297398	0.612903	0.387097	0	-0.47709	0.339112	NA	-0.816202
GPR85	7	112720467	112726393	-	0.0761102	0.297398	0.645161	0.354839	0	1.94412	0.986211	NA	0.957914
PCDHA10	5	140235467	140391929	+	0.0761455	0.297398	0.580645	0.419355	0	1.58592	-0.33041	NA	1.91633
HECTD4	12	112597991	112819896	-	0.0763215	0.297887	0.483871	0.516129	0	2.42084	1.6883	NA	0.732543
KRT17	17	39775691	39780882	-	0.0763688	0.297887	0.709677	0.290323	0	0.457734	-1.10411	NA	1.56185
C9orf135	9	72435720	72521151	+	0.0763905	0.297887	0.580645	0.387097	0.0322581	1.52018	-0.329919	3.89043	1.52546
MYO18A	17	27400527	27467397	-	0.0764875	0.297961	0.709677	0.258065	0.0322581	1.58428	0.751981	0.638535	0.844902
DONSON	21	34949856	34961014	-	0.0764895	0.297961	0.16129	0.741935	0.0967742	2.2212	1.11743	0.392	1.18747
SRSF5	14	70233803	70238722	+	0.0767177	0.298371	0.612903	0.387097	0	1.35618	0.466057	NA	0.890124
ARL1	12	101786897	101801598	-	0.0767481	0.298371	0.580645	0.419355	0	1.54816	0.876871	NA	0.671288
DNAL1	14	74111577	74170431	+	0.0767549	0.298371	0.612903	0.387097	0	2.61081	1.48258	NA	1.12823
NFYB	12	104510857	104532040	-	0.0768885	0.298595	0.580645	0.419355	0	1.50781	0.753693	NA	0.754121
UGT2B15	4	69512314	69536494	-	0.0769873	0.298595	0.612903	0.387097	0	0.913856	-1.40165	NA	2.31551
ACTR5	20	37377096	37401089	+	0.0769989	0.298595	0.677419	0.322581	0	1.47268	0.869334	NA	0.603348
ABCC4	13	95672082	95953700	-	0.0770451	0.298595	0.580645	0.322581	0.0967742	1.68725	1.16108	-1.00395	1.02579
AQP7	9	33384947	33402680	-	0.077113	0.298595	0.516129	0.419355	0.0645161	3.20717	1.84841	0.678101	1.5148
RBM26	13	79893002	79980356	-	0.0771718	0.298595	0.580645	0.322581	0.0967742	1.48639	0.929031	1.01068	0.538513
SIL1	5	138282408	138534065	-	0.0771928	0.298595	0.612903	0.387097	0	0.839301	-0.0454932	NA	0.884794
ETF1	5	137841781	137877400	-	0.0772064	0.298595	0.612903	0.387097	0	1.19605	0.52496	NA	0.671087
CRBN	3	3191316	3221401	-	0.0772457	0.298595	0.16129	0.806452	0.0322581	1.19286	0.628538	1.00889	0.549692
TTC21A	3	39149151	39180394	+	0.0772533	0.298595	0.16129	0.806452	0.0322581	2.37682	1.56463	-0.711486	0.899734
MRI1	19	13875327	13885096	+	0.0773783	0.298624	0.645161	0.354839	0	1.5191	0.741934	NA	0.777169
USP46	4	53457125	53522759	-	0.077381	0.298624	0.612903	0.387097	0	1.13776	0.421462	NA	0.716298
SKA2	17	57187219	57232800	-	0.0774419	0.298705	0.677419	0.322581	0	2.05762	1.36777	NA	0.689847
ZNF418	19	58433251	58446755	-	0.0774863	0.298716	0.645161	0.354839	0	0.641551	1.49368	NA	-0.852129
ZNF839	14	102783713	102809511	+	0.077554	0.298716	0.612903	0.387097	0	1.42873	0.817617	NA	0.611116
POLR2A	17	7387697	7417935	+	0.0775651	0.298716	0.483871	0.451613	0.0645161	1.67103	1.18392	0.648643	0.554021
B4GALT5	20	48249481	48330421	-	0.0777312	0.299201	0.677419	0.322581	0	2.03092	1.30289	NA	0.728028
ZMAT2	5	140079944	140086266	+	0.0778731	0.299546	0.580645	0.419355	0	1.83281	1.29172	NA	0.541097
DCAF5	14	69517636	69619316	-	0.0779013	0.299546	0.612903	0.387097	0	-0.630832	0.519515	NA	-1.15035
ZCCHC2	18	60190657	60245818	+	0.0780273	0.299876	0.516129	0.419355	0.0645161	1.68772	1.11907	1.05236	0.577547
MPP5	14	67708011	67802778	+	0.0780872	0.299952	0.612903	0.354839	0.0322581	1.07478	0.23987	1.85885	0.699999
C4orf36	4	87797357	87813575	-	0.0781952	0.300212	0.580645	0.419355	0	1.27598	0.53037	NA	0.745611
ARL6IP4	12	123464606	123467460	+	0.0782722	0.300353	0.580645	0.419355	0	1.08268	3.14472	NA	-2.06204
UHRF1BP1L	12	100430862	100536642	-	0.078349	0.300492	0.580645	0.419355	0	3.34836	2.35737	NA	0.990993
METTL2B	7	128116782	128142978	+	0.0784578	0.300755	0.645161	0.354839	0	1.89596	0.967718	NA	0.928238
UGT2A3	4	69794176	69817509	-	0.0786512	0.301015	0.612903	0.387097	0	-4.40285	-1.78311	NA	-2.61975
HERC3	4	89513573	89578585	+	0.0786817	0.301015	0.580645	0.419355	0	1.74667	0.883598	NA	0.863073
LYPD3	19	43964945	43969831	-	0.0786915	0.301015	0.677419	0.322581	0	3.04042	1.84248	NA	1.19795
NCKAP5L	12	50184928	50222208	-	0.0787237	0.301015	0.645161	0.354839	0	2.2233	1.39179	NA	0.831502
ARHGAP24	4	86396283	86923823	+	0.0787895	0.301015	0.580645	0.419355	0	-1.01877	-0.583414	NA	-0.435358
LAMTOR3	4	100799494	100815703	-	0.0788483	0.301015	0.580645	0.419355	0	1.82596	1.09717	NA	0.728791
SUPT16H	14	21819630	21852425	-	0.078912	0.301015	0.612903	0.387097	0	0.829864	1.61162	NA	-0.781761
PKNOX1	21	44394619	44453692	+	0.0789193	0.301015	0.16129	0.741935	0.0967742	1.87425	0.960188	1.51462	0.850088
YWHAG	7	75956107	75988342	-	0.078941	0.301015	0.645161	0.354839	0	1.93434	0.655222	NA	1.27912
ZFYVE28	4	2271323	2366604	-	0.0789538	0.301015	0.580645	0.419355	0	2.02743	1.03668	NA	0.990756
EDEM2	20	33703159	33735161	-	0.0789706	0.301015	0.677419	0.322581	0	1.20775	0.726044	NA	0.481707
FAF2	5	175875355	175937075	+	0.0790103	0.301015	0.612903	0.387097	0	1.50703	0.991567	NA	0.515464
TRIM16	17	15531279	15586265	-	0.0790925	0.301106	0.516129	0.419355	0.0645161	0.71652	-1.56222	0.322031	2.02751
TBC1D17	19	50380681	50392007	+	0.079156	0.301106	0.677419	0.322581	0	0.853934	0.324306	NA	0.529628
RDH5	12	56114150	56118526	+	0.079195	0.301106	0.580645	0.419355	0	3.1315	1.51052	NA	1.62097
RACGAP1	12	50382944	50419340	-	0.0792612	0.301106	0.645161	0.354839	0	2.89922	2.16193	NA	0.737294
TMUB1	7	150778171	150780413	-	0.0792917	0.301106	0.645161	0.354839	0	0.103164	0.520826	NA	-0.417662
SIX4	14	61176255	61190852	-	0.0793393	0.301106	0.645161	0.354839	0	1.6686	0.625156	NA	1.04345
ANAPC10	4	145915726	146018534	-	0.0793563	0.301106	0.612903	0.387097	0	-0.530813	0.611056	NA	-1.14187
ST7	7	116593380	116863961	+	0.0793575	0.301106	0.645161	0.354839	0	0.499315	-0.0203048	NA	0.51962
RABGEF1	7	66147077	66276451	+	0.0794089	0.301147	0.645161	0.354839	0	0.938023	0.214322	NA	0.723701
BMP2	20	6748744	6760927	+	0.0794825	0.301274	0.709677	0.258065	0.0322581	0.710937	-0.392547	-0.737803	1.14185
FGF2	4	123747862	123819390	+	0.0797647	0.302189	0.580645	0.419355	0	1.61458	0.514798	NA	1.09979
ZNF296	19	45574757	45579846	-	0.0798372	0.30231	0.677419	0.322581	0	3.83023	2.05502	NA	1.77521
TMEM260	14	57046510	57116233	+	0.079951	0.30236	0.612903	0.387097	0	2.11845	1.41754	NA	0.700909
GPR146	7	1084208	1098905	+	0.0799583	0.30236	0.645161	0.354839	0	0.244478	1.45426	NA	-1.20978
PPP1R14A	19	38741876	38747231	+	0.0800089	0.30236	0.677419	0.322581	0	0.89872	-0.364202	NA	1.26292
FEM1C	5	114856607	114880591	-	0.0800125	0.30236	0.612903	0.387097	0	1.29795	0.597451	NA	0.700499
NUDT6	4	123813798	123843761	-	0.0801157	0.302577	0.580645	0.419355	0	1.81766	1.02786	NA	0.789798
SAMD9	7	92728825	92747336	-	0.0801666	0.302577	0.645161	0.354839	0	2.81361	1.77311	NA	1.0405
GNAQ	9	80331189	80646365	-	0.0802182	0.302577	0.580645	0.387097	0.0322581	2.10118	1.12845	2.47873	0.868866
TRIP6	7	100464949	100471076	+	0.0803035	0.302577	0.645161	0.354839	0	-0.987124	-0.174224	NA	-0.8129
GC	4	72607409	72650079	-	0.0803309	0.302577	0.612903	0.387097	0	4.56032	1.95238	NA	2.60794
KAT2A	17	40265128	40273382	-	0.0803486	0.302577	0.709677	0.290323	0	1.48277	0.759061	NA	0.723706
TENC1	12	53443834	53458162	+	0.0804098	0.302585	0.645161	0.354839	0	2.16202	0.965903	NA	1.19611
IARS	9	94972488	95056038	-	0.0804904	0.302585	0.580645	0.387097	0.0322581	0.807267	0.247533	0.146559	0.567501
PMP22	17	15133093	15164161	-	0.0805171	0.302585	0.516129	0.419355	0.0645161	2.0899	1.04225	0.61169	1.10506
ALG2	9	101978706	101984246	-	0.0805187	0.302585	0.548387	0.387097	0.0645161	0.353602	-1.14393	-0.152514	1.3559
REM2	14	23352431	23356889	+	0.0806238	0.302827	0.612903	0.387097	0	4.80707	3.07654	NA	1.73053
VTI1B	14	68117865	68141602	-	0.0807065	0.302985	0.612903	0.387097	0	1.26735	0.738744	NA	0.528608
FOXP2	7	113726364	114333827	+	0.0809519	0.303534	0.645161	0.354839	0	-0.0107855	-1.57053	NA	1.55974
TYW1B	7	72039491	72298813	-	0.0809563	0.303534	0.645161	0.354839	0	1.41851	0.839298	NA	0.579215
ZNF335	20	44577291	44600833	-	0.0809749	0.303534	0.677419	0.322581	0	1.27306	0.271782	NA	1.00127
MBIP	14	36767763	36789882	-	0.0810315	0.303593	0.612903	0.387097	0	1.70473	1.02954	NA	0.675188
CTIF	18	46065426	46389588	+	0.0810722	0.303593	0.548387	0.387097	0.0645161	1.71959	0.749731	0.869354	0.952775
LMBRD2	5	36103413	36152015	-	0.0811257	0.303641	0.612903	0.387097	0	2.18261	1.36311	NA	0.819498
CX3CR1	3	39304984	39321930	-	0.0811836	0.303663	0.16129	0.806452	0.0322581	-0.130939	1.62442	0.637489	-1.7174
GPATCH8	17	42472644	42514219	-	0.0812132	0.303663	0.709677	0.290323	0	2.12028	1.25708	NA	0.863197
AP4M1	7	99699129	99704803	+	0.0812953	0.303818	0.645161	0.322581	0.0322581	1.93619	0.984487	0.773662	0.970872
HLCS	21	38123188	38338956	-	0.0813364	0.303819	0.16129	0.741935	0.0967742	1.45893	0.821708	1.06548	0.609096
CGRRF1	14	54976586	55005334	+	0.0814069	0.30393	0.612903	0.387097	0	1.61788	0.892397	NA	0.725483
LRP10	14	23340925	23350922	+	0.0815918	0.304468	0.612903	0.387097	0	1.32204	0.680862	NA	0.641181
NEMF	14	50250238	50319921	-	0.0816814	0.304608	0.612903	0.387097	0	1.6543	0.61301	NA	1.04129
ATP9A	20	50213313	50384950	-	0.0817168	0.304608	0.677419	0.322581	0	-0.318271	0.876734	NA	-1.19501
TTR	18	29171729	29178987	+	0.081752	0.304608	0.580645	0.354839	0.0645161	4.98406	0.739176	7.78365	3.16112
GET4	7	916190	936071	+	0.081896	0.304992	0.645161	0.354839	0	1.10796	0.351957	NA	0.756001
APC	5	112043201	112181936	+	0.0819506	0.305043	0.612903	0.387097	0	2.17998	1.34771	NA	0.832267
TDRD9	14	104394816	104519004	+	0.082094	0.305173	0.612903	0.387097	0	3.75552	1.42838	NA	2.32715
TRIM16L	17	18625401	18639431	+	0.0821003	0.305173	0.516129	0.419355	0.0645161	1.35013	0.574428	0.567345	0.776647
IQCD	12	113633245	113658899	-	0.0821182	0.305173	0.580645	0.419355	0	3.19439	1.99704	NA	1.19735
PMS2	7	6010555	6048659	-	0.0821493	0.305173	0.645161	0.354839	0	1.76546	1.20208	NA	0.563381
CAND2	3	12838170	12876313	+	0.0823085	0.305441	0.16129	0.806452	0.0322581	3.53841	2.44127	4.90291	1.00246
HELZ2	20	62189438	62199107	-	0.0823446	0.305441	0.677419	0.322581	0	1.94147	1.0117	NA	0.929764
EEPD1	7	36192835	36341152	+	0.0824148	0.305493	0.645161	0.354839	0	0.440223	1.32955	NA	-0.889327
HSPA2	14	65007185	65009955	+	0.0824405	0.305493	0.612903	0.387097	0	1.15784	2.09217	NA	-0.934327
PRNP	20	4666796	4682234	-	0.0825508	0.305634	0.709677	0.258065	0.0322581	1.77309	4.16007	0.226939	-1.94997
NGB	14	77731833	77737655	-	0.0825607	0.305634	0.612903	0.387097	0	-2.28227	-0.745028	NA	-1.53724
ZNF260	19	37001588	37019248	-	0.0826117	0.305671	0.677419	0.322581	0	2.16107	1.44701	NA	0.714063
MAST3	19	18208602	18262499	+	0.0828075	0.306067	0.645161	0.354839	0	1.05369	0.358388	NA	0.695299
HOMEZ	14	23742843	23755309	-	0.0828532	0.306067	0.612903	0.387097	0	1.57062	1.08028	NA	0.490337
CCT6A	7	56119377	56131682	+	0.0829124	0.306067	0.645161	0.354839	0	1.54935	0.929231	NA	0.62012
JOSD2	19	51009253	51014416	-	0.082956	0.306067	0.677419	0.322581	0	1.53092	0.814035	NA	0.716889
CPM	12	69244954	69357020	-	0.0829656	0.306067	0.645161	0.354839	0	1.80141	0.682366	NA	1.11905
FAM83E	19	49103856	49116694	-	0.0830279	0.306067	0.677419	0.322581	0	3.43367	0.996613	NA	2.43706
NUMBL	19	41171809	41196069	-	0.0830347	0.306067	0.677419	0.322581	0	2.95146	1.51832	NA	1.43315
SRRM5	19	44116252	44118650	+	0.0830471	0.306067	0.677419	0.322581	0	2.81906	0.776953	NA	2.0421
RASA4	7	102220092	102257205	-	0.0831419	0.306227	0.612903	0.387097	0	2.73731	1.49559	NA	1.24172
GFM2	5	74017028	74063196	-	0.0832104	0.306227	0.645161	0.354839	0	1.71038	1.28141	NA	0.428969
TIMM44	19	7991602	8008708	-	0.0833185	0.306227	0.645161	0.354839	0	1.32239	0.808074	NA	0.514316
CTXN1	19	7989380	7991051	-	0.0833283	0.306227	0.645161	0.354839	0	5.22513	3.64442	NA	1.5807
MPRIP	17	16946073	17095962	+	0.0833655	0.306227	0.516129	0.419355	0.0645161	2.312	1.65998	1.38847	0.688222
PGPEP1	19	18451396	18480762	+	0.0833868	0.306227	0.645161	0.354839	0	1.60493	0.340243	NA	1.26469
ING2	4	184426202	184433581	+	0.0834241	0.306227	0.516129	0.483871	0	1.65585	0.861015	NA	0.794835
PALLD	4	169418216	169849608	+	0.0834605	0.306227	0.516129	0.483871	0	3.53351	2.23632	NA	1.29719
TOR2A	9	130493802	130497628	-	0.0837571	0.307013	0.548387	0.419355	0.0322581	1.66005	1.0879	2.12322	0.498205
SH3BP2	4	2794749	2842823	+	0.0840327	0.307749	0.580645	0.419355	0	-0.0797826	0.802587	NA	-0.88237
CCNE1	19	30302900	30315224	+	0.0840405	0.307749	0.677419	0.322581	0	2.13671	0.997863	NA	1.13885
OR2A7	7	143955788	143956721	-	0.0841061	0.307838	0.645161	0.354839	0	1.00402	-0.255669	NA	1.25969
URB1	21	33683329	33765312	-	0.0841613	0.307889	0.16129	0.741935	0.0967742	1.21223	0.646258	0.170765	0.620834
C5orf42	5	37106329	37249530	-	0.0842066	0.307903	0.645161	0.354839	0	1.95097	1.32422	NA	0.62675
RBMS3	3	29322802	30032809	+	0.0842691	0.30794	0.16129	0.806452	0.0322581	0.0201531	1.89304	-0.686439	-1.77368
ALDOC	17	26900132	26903951	-	0.0842993	0.30794	0.709677	0.258065	0.0322581	4.48687	3.04463	4.46807	1.28408
CD36	7	80231503	80303736	+	0.0844227	0.308127	0.645161	0.354839	0	0.95165	-0.0402071	NA	0.991857
RBP5	12	7276276	7281487	-	0.084433	0.308127	0.580645	0.419355	0	2.43123	1.63929	NA	0.791941
ATP7B	13	52506804	52585630	-	0.0845024	0.308229	0.580645	0.322581	0.0967742	1.56331	0.866126	1.27826	0.602078
SPINK4	9	33240161	33248565	+	0.0845712	0.308329	0.548387	0.387097	0.0645161	-0.432438	0.598387	0.668559	-1.04085
FAM129B	9	130267616	130331396	-	0.0846143	0.308335	0.548387	0.419355	0.0322581	-0.274917	-0.668517	-2.09723	0.495651
UBE2O	17	74385612	74449288	-	0.0846774	0.308415	0.677419	0.322581	0	1.60832	1.03262	NA	0.575696
DNLZ	9	139256351	139258263	-	0.0848829	0.308864	0.580645	0.387097	0.0322581	1.4813	0.261642	-2.05022	1.3975
POC5	5	74970022	75008280	-	0.0848837	0.308864	0.645161	0.354839	0	2.61012	1.83453	NA	0.775588
[truncated: 4,939 more rows]

## Sheet: Supp Table 2
Supplementary table S2: iGC results for sbNETs.
Copy number gain gene results for sbNETs															Copy number loss gene results for sbNETs
	Locus Information			Students t-test with unequal variance		Copy number status (%)	Copy number status (%)			Gene Expression (Log2Fold change)					Gene	Locus Information			Students t-test with unequal variance		Copy number status (%)			Gene Expression (Log2Fold change)
Gene Name	Chr	Start	End	strand	p_value	fdr	Copy number gain	Copy number normal	Copy number loss	Expression in gain samples	Expression in normal samples	Expression in loss samples	Difference (gain -normal)		Gene Name	Chr	Start	End	p_value	fdr	Copy number gain	Copy number normal	Copy number loss	Expression in gain samples	Expression in normal samples	Expression in loss samples	Difference (normal - loss)
PDE6B	4	619362	664681	+	4e-06	0.00927468	0.424242	0.575758	0	3.14096	1.45074	NA	1.69021		UBAC1	9	138824814	138853226	1.74e-08	2.67e-05	0	0.848485	0.151515	NA	-0.492503	-1.38397	-0.89147
RGS12	4	3315873	3433904	+	5.19e-06	0.00927468	0.424242	0.575758	0	1.34532	0.387707	NA	0.957616		ASB6	9	132396882	132404448	3.04e-06	0.00193667	0	0.848485	0.151515	NA	0.351461	-0.34364	-0.695101
SPRN	10	135234169	135238121	-	3.52e-05	0.0418663	0.242424	0.757576	0	1.51964	0.531244	NA	0.988392		PROSER1	13	39584001	39612213	4.81e-06	0.00193667	0.030303	0.787879	0.181818	0.0353335	0.105018	-1.13413	-1.23657
LYAR	4	4269427	4291748	-	6.68e-05	0.0527314	0.454545	0.545455	0	0.61668	-0.358133	NA	0.974813		MTUS2	13	29598747	30080084	6.75e-06	0.00193667	0.030303	0.818182	0.151515	2.45538	-0.645443	2.79781	3.33251
RTEL1	20	62289162	62327606	+	7.78e-05	0.0527314	0.575758	0.424242	0	1.08611	0.0513887	NA	1.03472		TRAF2	9	139780964	139821067	7.47e-06	0.00193667	0	0.848485	0.151515	NA	0.611389	-0.530016	-1.14141
NAA20	20	19997933	20014273	+	9.55e-05	0.0527314	0.545455	0.454545	0	1.85942	0.0941395	NA	1.76528		NDUFA8	9	124894744	124922098	7.56e-06	0.00193667	0	0.848485	0.151515	NA	-0.340824	-0.972848	-0.632025
RBBP9	20	18467183	18477887	-	0.00013357	0.0527314	0.545455	0.454545	0	0.957843	0.344432	NA	0.613411		ADPRHL1	13	114076254	114103457	1.25e-05	0.00274202	0.0909091	0.727273	0.181818	0.901617	-0.40734	-2.82503	-2.56313
B4GALT5	20	48249481	48330421	-	0.000139877	0.0527314	0.575758	0.424242	0	0.466112	-0.219684	NA	0.685796		ABHD13	13	108870762	108886603	1.64e-05	0.00284858	0.030303	0.787879	0.181818	0.169698	-0.0666734	-1.12514	-1.06722
C10orf35	10	71390002	71393355	+	0.000145728	0.0527314	0.212121	0.787879	0	1.94039	0.584895	NA	1.35549		FREM2	13	39261172	39461268	1.9e-05	0.00284858	0.030303	0.757576	0.212121	-0.219229	-4.18736	2.84569	6.88043
NAT8L	4	2061238	2070816	+	0.000147583	0.0527314	0.424242	0.575758	0	2.04086	-1.6234	NA	3.66426		C9orf78	9	132589563	132597572	2.01e-05	0.00284858	0	0.848485	0.151515	NA	0.115194	-0.39028	-0.505474
ZCCHC4	4	25314395	25354749	+	0.000186061	0.0567771	0.454545	0.545455	0	0.648698	-0.0197447	NA	0.668443		CDX2	13	28536204	28543505	2.08e-05	0.00284858	0.030303	0.818182	0.151515	-0.713487	0.768494	-2.43033	-3.14589
NELFA	4	1984440	2010962	-	0.000190687	0.0567771	0.424242	0.575758	0	0.923607	0.297554	NA	0.626053		SEC16A	9	139334547	139377507	2.35e-05	0.00284858	0	0.848485	0.151515	NA	0.474596	-0.285984	-0.760579
MRPS30	5	44809026	44815616	+	0.000219477	0.0603223	0.393939	0.606061	0	0.540666	0.0762743	NA	0.464392		FAM76B	11	95502105	95522954	2.41e-05	0.00284858	0	0.848485	0.151515	NA	0.126096	-0.94007	-1.06617
TET1	10	70320116	70454239	+	0.000252575	0.0644608	0.212121	0.727273	0.0606061	2.93069	0.924602	0.813139	2.01466		NELFB	9	140149751	140168000	3.63e-05	0.00398242	0	0.848485	0.151515	NA	0.35647	-0.472475	-0.828945
EIF4E	4	99792834	99850243	-	0.000365755	0.0871227	0.424242	0.575758	0	0.844826	0.250683	NA	0.594143		RAPGEF1	9	134452156	134585229	4.29e-05	0.00439728	0	0.848485	0.151515	NA	0.0788374	-0.77711	-0.855948
CEP250	20	34043222	34099804	+	0.000394884	0.0878454	0.545455	0.454545	0	1.10237	0.497763	NA	0.604604		ERCC5	13	103498190	103528351	4.72e-05	0.00453754	0.030303	0.787879	0.181818	-0.00453518	-0.00190097	-1.37505	-1.37306
PDCD11	10	105156411	105206019	+	0.00041796	0.0878454	0.212121	0.787879	0	1.27056	0.559544	NA	0.711019		TOR1B	9	132565421	132573568	5.41e-05	0.0047299	0	0.848485	0.151515	NA	-0.158375	-1.11949	-0.961111
NUTM2B	10	81462982	81472513	+	0.000443324	0.0879998	0.212121	0.787879	0	1.73392	1.06956	NA	0.664357		LAMP1	13	113951468	113977741	5.54e-05	0.0047299	0.0909091	0.727273	0.181818	0.490654	0.161274	-1.03495	-1.23282
CAMLG	5	134074169	134087850	+	0.000520598	0.0912167	0.424242	0.575758	0	2.11838	0.661515	NA	1.45687		C9orf114	9	131586025	131592100	7.57e-05	0.00610253	0	0.848485	0.151515	NA	0.314562	-0.427039	-0.741601
DPF3	14	73086003	73360824	-	0.000532542	0.0912167	0.363636	0.636364	0	0.0144516	-1.01103	NA	1.02548		DPM2	9	130697373	130700763	8.46e-05	0.00610253	0	0.848485	0.151515	NA	0.922468	0.151906	-0.770562
PCGF3	4	699529	764768	+	0.000536118	0.0912167	0.424242	0.575758	0	0.948484	0.138198	NA	0.810286		SPRYD7	13	50486837	50510637	8.48e-05	0.00610253	0.0606061	0.69697	0.242424	0.998608	0.522234	-0.148688	-0.709032
NCOA3	20	46130600	46285621	+	0.000631107	0.102497	0.545455	0.454545	0	0.458948	-0.42119	NA	0.880138		FUBP3	9	133454959	133513739	9.01e-05	0.00610253	0	0.848485	0.151515	NA	0.687962	-0.318764	-1.00673
CST2	20	23804403	23807312	-	0.000687934	0.103576	0.515152	0.484848	0	8.07706	4.52907	NA	3.54799		RRAGA	9	19049371	19051023	9.13e-05	0.00610253	0	0.818182	0.181818	NA	0.27946	-0.61716	-0.89662
PTPN20A	10	46549954	46641045	-	0.000747034	0.103576	0.242424	0.757576	0	-1.00581	1.49099	NA	-2.4968		UBE2R2	9	33817181	33920401	0.000155572	0.00967283	0	0.818182	0.181818	NA	-0.0257866	-0.852521	-0.826735
POLN	4	2073684	2243891	-	0.000759059	0.103576	0.424242	0.575758	0	0.0269606	-1.31487	NA	1.34183		EPG5	18	43427573	43547305	0.000157231	0.00967283	0	0.363636	0.636364	NA	0.217605	-0.635596	-0.853201
ACOT1	14	74003927	74010498	+	0.000785737	0.103576	0.363636	0.636364	0	0.406811	-0.395973	NA	0.802784		INIP	9	115446227	115480429	0.000199693	0.0118126	0	0.848485	0.151515	NA	-0.0510434	-0.6366	-0.585557
LMBR1	7	156473569	156685902	-	0.000790346	0.103576	0.30303	0.69697	0	1.34085	0.483645	NA	0.857203		GTF3A	13	27998680	28009846	0.000223895	0.0127537	0.0606061	0.757576	0.181818	0.288689	0.407179	-1.07912	-1.47752
NUP155	5	37291734	37371228	-	0.000820358	0.103576	0.454545	0.545455	0	0.643454	0.0912167	NA	0.552237		SUGT1	13	53226825	53262489	0.000240875	0.0130155	0.030303	0.757576	0.212121	0.11611	0.31916	-0.536093	-0.847443
RINT1	7	105172527	105208131	+	0.000840671	0.103576	0.272727	0.727273	0	0.80245	0.163951	NA	0.638499		PRPF4	9	116037913	116055185	0.000252467	0.0130155	0	0.848485	0.151515	NA	0.521956	-0.21204	-0.733996
GSTCD	4	106629940	106768882	+	0.000928329	0.104212	0.393939	0.606061	0	0.510642	-0.213492	NA	0.724134		CHAMP1	13	115079809	115092803	0.000253878	0.0130155	0.0909091	0.727273	0.181818	-0.0860554	-0.132	-0.924146	-0.797251
SLBP	4	1694457	1714468	-	0.00100316	0.104212	0.424242	0.575758	0	1.01409	0.282591	NA	0.731499		PSMD5	9	123578330	123605299	0.000276224	0.0137043	0	0.848485	0.151515	NA	0.439871	-0.415743	-0.855613
H2AFZ	4	100869243	100871512	-	0.0010161	0.104212	0.424242	0.575758	0	0.68013	0.00258852	NA	0.677541		AASDHPPT	11	105948291	105969419	0.000324869	0.015614	0	0.848485	0.151515	NA	1.03912	0.2764	-0.762719
CDC23	5	137523336	137549032	-	0.00107247	0.104212	0.424242	0.575758	0	0.856275	0.327417	NA	0.528858		SPTAN1	9	131314836	131395944	0.000335456	0.0156343	0	0.848485	0.151515	NA	0.992851	-0.0805255	-1.07338
PRKG2	4	82008523	82075311	-	0.00107993	0.104212	0.424242	0.575758	0	-2.97697	-0.126293	NA	-2.85067		SMARCA2	9	2015218	2193624	0.000375938	0.0170057	0	0.818182	0.181818	NA	0.236063	-0.978527	-1.21459
SPATA5	4	123844224	123949651	+	0.00108822	0.104212	0.424242	0.575758	0	0.860249	0.00848772	NA	0.851761		TOR1A	9	132575220	132586441	0.000397437	0.0174144	0	0.848485	0.151515	NA	0.286493	-0.377716	-0.664209
ADO	10	64564515	64568239	+	0.00111371	0.104212	0.212121	0.787879	0	0.770425	0.227856	NA	0.542569		CLN5	13	77566058	77576652	0.000417252	0.0174144	0.030303	0.787879	0.181818	1.46475	0.48307	-0.533864	-1.05329
CDK5RAP1	20	31946644	31989375	-	0.00112228	0.104212	0.515152	0.454545	0.030303	0.814075	0.266091	0.921606	0.507014		SNAPC4	9	139270020	139292889	0.000418943	0.0174144	0	0.848485	0.151515	NA	0.45836	-0.339743	-0.798102
TBXAS1	7	139478046	139720125	+	0.00119737	0.104212	0.30303	0.69697	0	1.64292	0.380173	NA	1.26275		FANCC	9	97861335	98079536	0.000486132	0.0195883	0	0.818182	0.181818	NA	0.731088	-0.516307	-1.24739
RBM23	14	23369853	23388396	-	0.00124055	0.104212	0.363636	0.636364	0	1.62764	-0.0203552	NA	1.648		SNX30	9	115513133	115637267	0.000496712	0.0195883	0	0.848485	0.151515	NA	-0.424637	-1.76714	-1.3425
TOP1	20	39657457	39753127	+	0.0012418	0.104212	0.515152	0.484848	0	0.536325	-0.268348	NA	0.804673		PPP1R26	9	138371647	138380739	0.000528939	0.0199409	0	0.848485	0.151515	NA	0.668979	-0.256681	-0.92566
TMEM175	4	926174	952444	+	0.00127382	0.104212	0.424242	0.575758	0	1.77287	0.731041	NA	1.04182		ALG11	13	52586522	52603780	0.000531586	0.0199409	0.030303	0.727273	0.242424	0.61718	-0.017919	-0.720338	-0.727823
PPID	4	159630278	159644552	-	0.00127785	0.104212	0.424242	0.575758	0	0.0919362	-0.353775	NA	0.445711		WDFY2	13	52158483	52336171	0.000549796	0.020133	0.0606061	0.69697	0.242424	1.14305	1.0116	0.178368	-0.843747
KCNK13	14	90528108	90652201	+	0.00127951	0.104212	0.363636	0.636364	0	-0.274687	2.17783	NA	-2.45252		UBAP2	9	33921690	34048947	0.000573975	0.0204327	0	0.818182	0.181818	NA	0.731149	-0.081466	-0.812615
ACSL6	5	131285665	131347355	-	0.00128333	0.104212	0.393939	0.575758	0.030303	0.88388	-0.752896	1.21553	1.53835		IRS2	13	110406183	110438914	0.000586412	0.0204327	0.0606061	0.757576	0.181818	1.32352	0.681475	-0.256936	-0.98597
BAMBI	10	28966423	28971868	+	0.00139085	0.110433	0.212121	0.787879	0	5.54085	2.55153	NA	2.98933		NDUFV2	18	9102627	9134343	0.000597836	0.0204327	0	0.363636	0.636364	NA	-0.136879	-0.768732	-0.631853
MTRNR2L2	5	79945818	79946854	-	0.00143401	0.111145	0.454545	0.545455	0	0.376769	-0.269644	NA	0.646413		LHFP	13	39917028	40177356	0.000625115	0.0205188	0.030303	0.787879	0.181818	0.0776224	0.0302796	1.21394	1.18191
DLG5	10	79550548	79686348	-	0.00148849	0.111145	0.212121	0.787879	0	1.84291	0.752028	NA	1.09088		GTF3C4	9	135545421	135570342	0.000627038	0.0205188	0	0.848485	0.151515	NA	0.573846	-0.432173	-1.00602
NSUN7	4	40751913	40813199	+	0.00149314	0.111145	0.424242	0.575758	0	3.24207	1.74567	NA	1.4964		TM9SF2	13	100153627	100216302	0.000662136	0.0210063	0.030303	0.787879	0.181818	-0.247672	-0.0834443	-1.52846	-1.43894
ACTR5	20	37377096	37401089	+	0.00152503	0.111203	0.515152	0.484848	0	0.822885	0.312753	NA	0.510132		SH3GLB2	9	131770070	131790632	0.000669252	0.0210063	0	0.848485	0.151515	NA	0.0493348	-0.953393	-1.00273
NDUFB8	10	102283485	102289680	-	0.00170882	0.122112	0.212121	0.787879	0	-3.27504	1.12085	NA	-4.3959		TRPC4	13	38210772	38443939	0.000735709	0.0226304	0.030303	0.757576	0.212121	-1.07646	-1.57408	1.17697	2.73191
GRPEL1	4	7060621	7069937	-	0.00193885	0.135126	0.454545	0.545455	0	0.976321	0.277518	NA	0.698802		URAD	13	28552242	28562774	0.000774041	0.0231907	0.030303	0.818182	0.151515	-1.48588	0.102254	-3.35821	-3.40375
OPRL1	20	62711434	62731996	+	0.00196657	0.135126	0.575758	0.424242	0	1.35792	0.190914	NA	1.16701		TLE1	9	84198597	84304450	0.000784082	0.0231907	0	0.818182	0.181818	NA	1.64973	0.490534	-1.1592
RELL1	4	37592421	37687999	-	0.00200705	0.135305	0.484848	0.515152	0	1.0368	-0.11528	NA	1.15208		QSOX2	9	139098178	139137687	0.000867316	0.0248584	0	0.848485	0.151515	NA	1.33855	0.631924	-0.706629
AGPAT5	8	6565877	6619024	+	0.00214759	0.140298	0.242424	0.757576	0	0.921851	-0.139258	NA	1.06111		FARP1	13	98794815	99102027	0.000872791	0.0248584	0.030303	0.787879	0.181818	2.20516	1.25677	2.06608	0.774188
ADRA2C	4	3768295	3770253	+	0.00216798	0.140298	0.454545	0.545455	0	0.692668	-1.35672	NA	2.04938		SAP18	13	21714652	21723224	0.000893641	0.0249894	0.0909091	0.727273	0.181818	0.931004	0.599271	-0.402208	-1.03834
FAM208B	10	5726800	5805703	+	0.00219891	0.140298	0.242424	0.757576	0	1.21932	0.684605	NA	0.53472		NFX1	9	33290414	33348721	0.000917247	0.0251915	0	0.818182	0.181818	NA	0.0974496	-0.460358	-0.557808
USP46	4	53457125	53522759	-	0.00233397	0.143887	0.393939	0.606061	0	1.2253	0.485849	NA	0.739452		HABP4	9	99212436	99253618	0.000936817	0.0252776	0	0.848485	0.151515	NA	1.45737	0.363731	-1.09364
EDRF1	10	127408083	127452712	+	0.00233891	0.143887	0.212121	0.757576	0.030303	1.07124	-0.0373335	-0.603401	1.13034		FECH	18	55212072	55253969	0.000965293	0.0255969	0	0.363636	0.636364	NA	0.248274	-0.316333	-0.564607
CCSER1	4	91048683	92523370	+	0.00237597	0.143887	0.424242	0.575758	0	0.937807	-1.10113	NA	2.03894		INTS6	13	51935700	52027275	0.00100531	0.0258535	0.0606061	0.69697	0.242424	-0.75882	-0.386428	-0.950188	-0.533969
TACC3	4	1723216	1746905	+	0.00242626	0.144484	0.424242	0.575758	0	0.158943	-1.02908	NA	1.18802		GNAQ	9	80331189	80646365	0.00101432	0.0258535	0	0.818182	0.181818	NA	0.86388	-0.277876	-1.14176
TTC9	14	71108503	71142077	+	0.00250348	0.146638	0.363636	0.636364	0	1.94135	0.84839	NA	1.09296		ALDH1A1	9	75515577	75568233	0.00103371	0.0258535	0	0.818182	0.181818	NA	0.784016	-0.388548	-1.17256
ZNF32	10	44139306	44144247	-	0.0025518	0.147058	0.272727	0.727273	0	1.45405	0.797332	NA	0.656718		ASXL3	18	31158540	31331159	0.00104221	0.0258535	0	0.363636	0.636364	NA	-0.938322	-2.74626	-1.80793
ATP6AP1L	5	81575280	81614465	+	0.00274814	0.15165	0.454545	0.545455	0	1.17589	0.271015	NA	0.904877		PCDH9	13	66876965	67804468	0.00110405	0.0266172	0.030303	0.787879	0.181818	-4.07027	-1.77829	0.126347	1.98952
C5orf55	5	441642	443258	-	0.002767	0.15165	0.484848	0.515152	0	1.85724	1.1727	NA	0.684544		MTMR6	13	25820338	25861704	0.00110761	0.0266172	0.0606061	0.757576	0.181818	0.517955	0.716197	-0.402793	-1.10431
LANCL2	7	55433140	55501435	+	0.00278725	0.15165	0.242424	0.757576	0	1.24321	0.424235	NA	0.818979		ISCA1	9	88879460	88897490	0.00114313	0.026798	0	0.818182	0.181818	NA	0.682105	-0.238048	-0.920154
CST5	20	23856571	23860380	-	0.00280126	0.15165	0.515152	0.484848	0	4.79491	1.26014	NA	3.53477		BORA	13	73301886	73330336	0.00115458	0.026798	0.0606061	0.757576	0.181818	-1.64288	-0.754854	-1.98194	-1.16131
GRK4	4	2965342	3042474	+	0.00284733	0.151843	0.424242	0.575758	0	1.91174	0.969752	NA	0.941983		GBA2	9	35736858	35749233	0.0011674	0.026798	0	0.818182	0.181818	NA	-0.0595409	-0.71393	-0.654389
INA	10	105036919	105050108	+	0.00291862	0.153356	0.212121	0.787879	0	6.4536	4.94334	NA	1.51026		KLF5	13	73629113	73651680	0.00119693	0.0270718	0.0606061	0.757576	0.181818	-2.02099	-0.277857	-2.97568	-2.56871
MXD4	4	2249159	2263739	-	0.00308356	0.159675	0.424242	0.575758	0	1.3107	0.414369	NA	0.896331		CXXC1	18	47808712	47814692	0.00127875	0.028364	0	0.363636	0.636364	NA	0.233411	-0.201314	-0.434725
FITM2	20	42931477	42939892	-	0.00317679	0.161416	0.515152	0.484848	0	1.55856	0.904741	NA	0.653814		ALKBH8	11	107373452	107436461	0.00129095	0.028364	0	0.848485	0.151515	NA	0.458896	-0.178331	-0.637227
DDX27	20	47835831	47860614	+	0.00320754	0.161416	0.545455	0.454545	0	0.667321	0.0671415	NA	0.600179		NTMT1	9	132371162	132398410	0.00134571	0.0291052	0	0.848485	0.151515	NA	0.245377	-0.715789	-0.961166
RPP30	10	92631708	92668312	+	0.00349001	0.173192	0.212121	0.787879	0	0.817013	0.107514	NA	0.709499		TMCO3	13	114145307	114204544	0.00139046	0.0291052	0.0909091	0.727273	0.181818	1.01173	0.677175	-0.885865	-1.60021
CTNNA3	10	67672275	69425443	-	0.00363824	0.178074	0.212121	0.787879	0	2.23902	-1.12998	NA	3.369		UBQLN1	9	86274877	86323168	0.00139835	0.0291052	0	0.818182	0.181818	NA	0.380867	-0.618161	-0.999027
MBLAC1	7	99724316	99726121	+	0.00378578	0.182792	0.212121	0.787879	0	1.98074	0.371895	NA	1.60884		VPS36	13	52986736	53024379	0.0014042	0.0291052	0.030303	0.727273	0.242424	0.183703	-0.297045	-1.1262	-0.848383
TLL2	10	98124362	98273683	-	0.0038603	0.183905	0.212121	0.787879	0	-3.09212	-1.52607	NA	-1.56605		MLLT3	9	20341662	20621986	0.0014193	0.0291052	0	0.818182	0.181818	NA	0.588148	-0.600634	-1.18878
E2F1	20	32263291	32274210	-	0.00395468	0.185922	0.484848	0.484848	0.030303	0.285726	-0.798151	-0.197927	1.04857		PAK3	X	110187468	110470589	0.0014797	0.0299445	0	0.666667	0.333333	NA	3.96772	2.18309	-1.78463
FAM53A	4	1641607	1685718	-	0.00404587	0.187276	0.424242	0.575758	0	1.73487	0.498026	NA	1.23684		VCP	9	35056064	35072739	0.00167557	0.0334679	0	0.818182	0.181818	NA	0.285722	-0.198803	-0.484525
NUTM2A	10	88985204	88994735	+	0.0040883	0.187276	0.212121	0.787879	0	1.45058	0.882114	NA	0.568469		CWF19L2	11	107197070	107328572	0.0017374	0.0337755	0	0.848485	0.151515	NA	0.0642213	-0.832821	-0.897043
C7orf55-LUC7L2	7	139025877	139108203	+	0.00446168	0.198501	0.30303	0.69697	0	1.10259	-0.0170471	NA	1.11964		BRD3	9	136895426	136933141	0.00174912	0.0337755	0	0.848485	0.151515	NA	0.752059	-0.399758	-1.15182
CCNI	4	77969164	77996063	-	0.00452064	0.198501	0.424242	0.575758	0	0.545992	0.10139	NA	0.444602		UHRF2	9	6413150	6507054	0.00175686	0.0337755	0	0.818182	0.181818	NA	-0.0888628	-1.28473	-1.19587
WBSCR16	7	74765875	74789332	-	0.00454949	0.198501	0.181818	0.818182	0	0.53795	0.0218578	NA	0.516092		GOLM1	9	88641055	88714510	0.00181423	0.0341136	0	0.818182	0.181818	NA	0.554155	-0.90067	-1.45482
ZRANB1	10	126630691	126676005	+	0.00461043	0.198501	0.212121	0.787879	0	0.819909	0.154571	NA	0.665339		RABL6	9	139702373	139728928	0.0018188	0.0341136	0	0.848485	0.151515	NA	0.620965	-0.42246	-1.04342
MND1	4	154265800	154336247	+	0.00461114	0.198501	0.424242	0.575758	0	0.352792	-0.968249	NA	1.32104		TMEM261	9	7796489	7799806	0.00184234	0.0341388	0	0.787879	0.212121	NA	0.461059	-0.292735	-0.753794
NUPL2	7	23221445	23240630	+	0.00477173	0.198876	0.272727	0.727273	0	0.6528	-0.0518804	NA	0.704681		ITM2B	13	48807273	48836232	0.00189687	0.0346301	0.030303	0.727273	0.242424	-0.37201	-0.169828	-1.20048	-1.02256
PIGG	4	492988	533710	+	0.00477577	0.198876	0.424242	0.575758	0	0.724333	0.10662	NA	0.617713		CUL5	11	107879407	107978488	0.00195632	0.0346301	0	0.848485	0.151515	NA	-0.08286	-0.750568	-0.667708
RAP1GDS1	4	99182526	99365012	+	0.00478682	0.198876	0.424242	0.575758	0	1.31602	0.399655	NA	0.916366		EHMT1	9	140513443	140678845	0.00197196	0.0346301	0	0.848485	0.151515	NA	0.133783	-0.519413	-0.653196
CCDC110	4	186366335	186392913	-	0.00496554	0.20393	0.454545	0.545455	0	0.605843	-1.03845	NA	1.6443		CENPP	9	95087749	95377446	0.00197437	0.0346301	0	0.818182	0.181818	NA	0.346434	-0.308527	-0.654962
DHTKD1	10	12110915	12165227	+	0.00520616	0.210949	0.181818	0.818182	0	1.1362	0.784892	NA	0.351311		KCTD12	13	77454303	77460540	0.00198144	0.0346301	0.030303	0.787879	0.181818	5.70043	2.80835	4.06756	1.15209
JPH4	14	24037243	24048009	-	0.00525453	0.210949	0.363636	0.636364	0	0.209751	3.55213	NA	-3.34238		UBL3	13	30338544	30424820	0.00209329	0.0356211	0.030303	0.818182	0.151515	0.25438	0.127771	-1.1446	-1.2769
MET	7	116312412	116438440	+	0.00541249	0.214876	0.272727	0.727273	0	0.170912	-0.91072	NA	1.08163		DCUN1D2	13	114110133	114145023	0.00210656	0.0356211	0.0909091	0.727273	0.181818	-0.385388	-0.291216	-1.19875	-0.897069
COMMD10	5	115420672	115628987	+	0.0056938	0.22356	0.393939	0.606061	0	0.675314	0.197176	NA	0.478138		USP20	9	132597695	132644117	0.00214095	0.0356211	0	0.848485	0.151515	NA	0.785275	-0.181083	-0.966358
PCBD2	5	134240809	134298336	+	0.00580794	0.223861	0.424242	0.575758	0	0.605185	0.0415718	NA	0.563613		NPC1	11	108028119	108093365	0.00214459	0.0356211	0	0.363636	0.636364	NA	-0.710732	-1.52924	-0.818512
FBXO18	10	5931534	5979558	+	0.00583346	0.223861	0.242424	0.757576	0	0.607131	0.0912446	NA	0.515886		ZBTB5	9	37438098	37465407	0.00215394	0.0356211	0	0.848485	0.151515	NA	0.244357	-0.738453	-0.98281
HTT	4	3076407	3245687	+	0.00594721	0.223861	0.424242	0.575758	0	1.03599	0.576191	NA	0.459797		MRPL41	9	140446308	140447007	0.00219374	0.0358933	0	0.848485	0.151515	NA	0.475843	-0.246632	-0.722475
BTRC	10	103113789	103317078	+	0.00595208	0.223861	0.212121	0.787879	0	1.32796	0.645493	NA	0.682471		WASF3	13	27131839	27263082	0.00226427	0.0366333	0.0606061	0.757576	0.181818	1.95105	1.50841	2.67424	1.13304
UQCC1	20	33890368	33999945	-	0.00618984	0.224913	0.545455	0.454545	0	-1.31928	1.21906	NA	-2.53833		VWA8	13	42140960	42535221	0.00228661	0.0366333	0.030303	0.757576	0.212121	0.654407	0.212268	-0.307978	-0.537251
GPHN	14	66974124	67648525	+	0.00620633	0.224913	0.393939	0.606061	0	1.0628	0.497261	NA	0.565535		DCLK1	13	36342788	36705514	0.00231606	0.0367227	0.030303	0.757576	0.212121	-0.277131	-2.52457	-0.499649	1.93848
MMS19	10	99218080	99258366	-	0.00623233	0.224913	0.212121	0.787879	0	1.0211	0.0117644	NA	1.00934		GOLGA2	9	131018107	131038268	0.00237296	0.037241	0	0.848485	0.151515	NA	1.00868	0.29016	-0.718521
APEX1	14	20923289	20925931	+	0.00627019	0.224913	0.363636	0.636364	0	0.743311	0.179187	NA	0.564124		DYM	18	46570171	46987079	0.00253139	0.039168	0	0.363636	0.636364	NA	-0.554084	-1.22483	-0.670749
PRF1	10	72357103	72362531	-	0.00629479	0.224913	0.212121	0.787879	0	-3.07842	-1.43106	NA	-1.64736		GLE1	9	131266970	131302156	0.00254668	0.039168	0	0.848485	0.151515	NA	-0.161706	-1.10099	-0.939288
TTC18	10	75013515	75118617	-	0.00645635	0.228401	0.242424	0.757576	0	2.8629	1.55795	NA	1.30495		TGDS	13	95226307	95248529	0.00264445	0.0400679	0.030303	0.787879	0.181818	0.37142	-0.12284	-0.916088	-0.811554
ENO4	10	118609022	118642112	+	0.00659183	0.229503	0.212121	0.787879	0	2.50375	1.45709	NA	1.04666		GNE	9	36214437	36258496	0.0026573	0.0400679	0	0.818182	0.181818	NA	1.0127	0.0194979	-0.993199
C12orf4	12	4596895	4647674	-	0.00661596	0.229503	0.151515	0.848485	0	0.662055	0.0784763	NA	0.583579		MED27	9	134735496	134955274	0.0027671	0.0413185	0	0.848485	0.151515	NA	0.84678	0.130771	-0.716009
LAP3	4	17578926	17609590	+	0.00669345	0.229959	0.484848	0.515152	0	0.133292	-0.415432	NA	0.548724		NUP214	9	134000947	134110057	0.00285777	0.042262	0	0.848485	0.151515	NA	0.599092	-0.047617	-0.646709
PABPC1L	20	43538700	43567958	+	0.00690608	0.234928	0.515152	0.484848	0	2.00326	0.281348	NA	1.72192		SPTLC1	9	94793415	94877756	0.00288854	0.0423102	0	0.818182	0.181818	NA	0.0433976	-1.02523	-1.06863
PCDHGA9	5	140782519	140785006	+	0.00696961	0.234928	0.454545	0.545455	0	-0.676078	0.677802	NA	-1.35388		WBP4	13	41635392	41658148	0.00324477	0.0470798	0.030303	0.757576	0.212121	0.672797	0.385069	-0.305662	-0.701798
TNNC2	20	44451852	44455953	-	0.00710166	0.235365	0.515152	0.484848	0	-3.29019	-1.4584	NA	-1.83179		FDX1	11	110300660	110335608	0.00352556	0.0503075	0	0.848485	0.151515	NA	-0.657445	-2.19593	-1.53848
ING2	4	184426202	184433581	+	0.00711432	0.235365	0.454545	0.545455	0	-0.639483	0.237009	NA	-0.876492		C9orf85	9	74526422	74588373	0.00353265	0.0503075	0	0.818182	0.181818	NA	0.260872	-0.617894	-0.878766
TNKS	8	9413444	9639856	+	0.00720312	0.236117	0.181818	0.818182	0	1.03533	0.229468	NA	0.805866		COMMD6	13	76099349	76112008	0.00393098	0.0554665	0.030303	0.787879	0.181818	0.208687	0.513528	-0.664786	-1.16702
UNC5C	4	96083654	96470361	-	0.00740299	0.237888	0.424242	0.575758	0	-0.29721	-1.81572	NA	1.51851		RAP2A	13	98086474	98120252	0.00416629	0.0569023	0.030303	0.787879	0.181818	0.925001	0.739439	-0.41385	-1.16016
GPR68	14	91698875	91710852	-	0.00747402	0.237888	0.363636	0.636364	0	1.42656	-0.0819877	NA	1.50855		NANS	9	100818958	100845365	0.00419931	0.0569023	0	0.848485	0.151515	NA	-0.433205	-1.67266	-1.23945
DUSP15	20	30435439	30458467	-	0.0074815	0.237888	0.545455	0.454545	0	2.64979	1.72654	NA	0.923253		PLAA	9	26903367	26947468	0.00422816	0.0569023	0	0.818182	0.181818	NA	0.238363	-0.426239	-0.664603
UROS	10	127473548	127511837	-	0.00752348	0.237888	0.212121	0.757576	0.030303	0.809746	0.143743	0.472868	0.653344		DAPK1	9	90112142	90323549	0.00423351	0.0569023	0	0.818182	0.181818	NA	0.279193	-0.938965	-1.21816
SPAG4	20	34203805	34208971	+	0.00768169	0.240761	0.545455	0.454545	0	1.21495	0.19001	NA	1.02494		POMT1	9	134378288	134399193	0.00424503	0.0569023	0	0.848485	0.151515	NA	0.515275	-1.51984	-2.03511
OGDHL	10	50942686	50970045	-	0.00787613	0.243852	0.242424	0.757576	0	4.93765	3.379	NA	1.55866		SPIN1	9	91003296	91093623	0.00425472	0.0569023	0	0.818182	0.181818	NA	0.492231	-1.15241	-1.64464
PLK4	4	128802015	128820379	+	0.00792663	0.243852	0.424242	0.575758	0	-0.739619	-2.2108	NA	1.47118		ZDHHC20	13	21946709	22033508	0.00447154	0.0584579	0.0909091	0.727273	0.181818	-0.346628	-0.365021	-1.50032	-1.13734
ADH6	4	100123794	100140403	-	0.0080226	0.243852	0.424242	0.575758	0	3.83735	1.50809	NA	2.32926		MSANTD3	9	103189494	103214016	0.0045737	0.0584579	0	0.848485	0.151515	NA	0.438577	-0.187801	-0.626378
RET	10	43572516	43622952	+	0.00808415	0.243852	0.272727	0.727273	0	5.66738	4.07878	NA	1.5886		FBXL3	13	77579388	77601331	0.00457376	0.0584579	0.030303	0.787879	0.181818	0.359691	-0.265426	-1.05235	-0.810075
TRIB3	20	361272	378203	+	0.00814838	0.243852	0.424242	0.575758	0	3.16811	1.76787	NA	1.40024		MEX3C	18	48700919	48724051	0.00457456	0.0584579	0	0.363636	0.636364	NA	0.174354	-0.375777	-0.550131
SMOX	20	4129425	4168394	+	0.00818981	0.243852	0.515152	0.484848	0	0.970647	-0.259392	NA	1.23004		DOLK	9	131707808	131710012	0.0046134	0.0584579	0	0.848485	0.151515	NA	0.554402	-0.066758	-0.62116
KIN	10	7792924	7829990	-	0.00833065	0.245016	0.242424	0.757576	0	0.779742	0.0718286	NA	0.707913		FPGS	9	130565136	130576360	0.00463522	0.0584579	0	0.848485	0.151515	NA	0.324345	-0.426961	-0.751306
KLB	4	39408472	39453153	+	0.00850113	0.245016	0.484848	0.515152	0	3.00078	5.11475	NA	-2.11397		SET	9	131445933	131458675	0.0046371	0.0584579	0	0.848485	0.151515	NA	0.549403	-0.304053	-0.853456
C10orf88	10	124690418	124713919	-	0.00852586	0.245016	0.212121	0.787879	0	0.994146	0.515988	NA	0.478158		TOPORS	9	32540541	32552626	0.00471285	0.0589297	0	0.818182	0.181818	NA	0.0496155	-0.838594	-0.88821
FBXO25	8	356807	419876	+	0.00853728	0.245016	0.212121	0.787879	0	0.497809	-0.253055	NA	0.750864		IPPK	9	95375465	95432547	0.00481398	0.0593018	0	0.818182	0.181818	NA	0.775913	-0.377971	-1.15388
MCM8	20	5931297	5975852	+	0.00857178	0.245016	0.515152	0.484848	0	0.0648406	-0.593433	NA	0.658274		SUCLA2	13	48516790	48575462	0.00481972	0.0593018	0.030303	0.727273	0.242424	-0.460978	-0.157699	-1.01074	-0.840915
LRRC20	10	72058725	72136535	-	0.00870309	0.246795	0.212121	0.787879	0	2.65927	1.50309	NA	1.15618		GOLGA1	9	127640572	127703386	0.00508738	0.0616933	0	0.848485	0.151515	NA	0.0392222	-0.713763	-0.752985
HOMEZ	14	23742843	23755309	-	0.00884944	0.248969	0.363636	0.636364	0	1.23782	0.751225	NA	0.486594		NDUFB6	9	32553523	32573182	0.00509431	0.0616933	0	0.818182	0.181818	NA	0.101057	-0.444996	-0.546053
FAM178A	10	102672325	102719347	+	0.00920129	0.256845	0.212121	0.787879	0	1.55232	0.425179	NA	1.12714		HDHD2	18	44633772	44676891	0.00519284	0.0622725	0	0.363636	0.636364	NA	0.439808	-0.249579	-0.689386
ZNF248	10	38065453	38146564	-	0.00943006	0.261191	0.212121	0.757576	0.030303	1.63918	0.113106	-0.347786	1.5438		IFT88	13	21140954	21265576	0.00525071	0.0622725	0.0909091	0.727273	0.181818	0.258321	0.430993	-0.142321	-0.554128
ARFRP1	20	62329994	62339205	-	0.00958923	0.261388	0.575758	0.424242	0	1.41259	0.0716647	NA	1.34093		LNX2	13	28120049	28194720	0.00526361	0.0622725	0.0606061	0.757576	0.181818	-0.0107106	-0.277562	-1.63407	-1.37628
ZBTB49	4	4291923	4323513	+	0.00964595	0.261388	0.454545	0.545455	0	0.480192	0.0165941	NA	0.463598		UNC13B	9	35161965	35405335	0.00539949	0.0629245	0	0.818182	0.181818	NA	0.896342	-0.0840532	-0.980395
PCM1	8	17780365	17887457	+	0.00967212	0.261388	0.151515	0.848485	0	0.665761	0.170606	NA	0.495155		KDSR	18	60994970	61034506	0.00540549	0.0629245	0	0.363636	0.636364	NA	-0.576607	-1.23599	-0.659387
IL7R	5	35856976	35879705	+	0.00972981	0.261388	0.424242	0.575758	0	-2.71625	-0.497437	NA	-2.21881		GPSM1	9	139221931	139236288	0.00544146	0.0629245	0	0.848485	0.151515	NA	0.61746	-0.899584	-1.51704
CUZD1	10	124591670	124605691	-	0.00987788	0.262178	0.212121	0.787879	0	0.61349	-0.3141	NA	0.92759		PHF2	9	96338908	96441869	0.00572879	0.0655378	0	0.818182	0.181818	NA	1.04211	-0.201384	-1.2435
CSGALNACT2	10	43633892	43680756	+	0.0099331	0.262178	0.272727	0.727273	0	0.826715	0.120257	NA	0.706459		C9orf37	9	140509783	140513308	0.00575267	0.0655378	0	0.848485	0.151515	NA	0.822811	0.0545054	-0.768306
DSN1	20	35380193	35402154	-	0.0101243	0.262178	0.545455	0.454545	0	-0.305727	-0.785593	NA	0.479866		PSMG2	18	12658737	12725739	0.00589016	0.0666108	0	0.363636	0.636364	NA	-0.222052	-0.969943	-0.747892
TCOF1	5	149737201	149764196	+	0.0101532	0.262178	0.393939	0.606061	0	0.927619	0.464092	NA	0.463527		ANAPC2	9	140069235	140083057	0.00595385	0.0668396	0	0.848485	0.151515	NA	0.705156	0.0369833	-0.668173
POLL	10	103338638	103348027	-	0.0102676	0.262178	0.212121	0.787879	0	0.975705	0.214805	NA	0.7609		CDK20	9	90581355	90589695	0.00606297	0.0668496	0	0.818182	0.181818	NA	0.144598	-1.49397	-1.63857
BTAF1	10	93683735	93790082	+	0.0102988	0.262178	0.212121	0.787879	0	0.293838	-0.556213	NA	0.850051		ATP5A1	18	43664109	43678319	0.00607837	0.0668496	0	0.363636	0.636364	NA	-0.499248	-1.11456	-0.61531
TBC1D19	4	26585545	26757835	+	0.0103033	0.262178	0.484848	0.515152	0	2.72399	1.55454	NA	1.16944		NOL8	9	95059639	95087876	0.00608514	0.0668496	0	0.818182	0.181818	NA	-0.0901042	-0.722692	-0.632588
ZNF22	10	45496272	45500777	+	0.0103462	0.262178	0.272727	0.727273	0	1.31465	0.661112	NA	0.653534		IFT74	9	26947036	27062931	0.00653799	0.0713151	0	0.818182	0.181818	NA	0.388883	-0.660487	-1.04937
N4BP2	4	40058523	40159872	+	0.010526	0.26338	0.484848	0.515152	0	1.16701	0.171859	NA	0.99515		NSMF	9	140342021	140353786	0.00669252	0.0722011	0	0.848485	0.151515	NA	-0.464104	-2.85925	-2.39515
CTSZ	20	57570241	57582309	-	0.0106046	0.26338	0.606061	0.393939	0	-1.40055	-0.509054	NA	-0.891493		C9orf156	9	100666771	100684852	0.00682137	0.0722011	0	0.848485	0.151515	NA	1.31275	-0.00765435	-1.3204
PCDHB3	5	140479825	140483411	+	0.010626	0.26338	0.454545	0.545455	0	0.583087	2.61094	NA	-2.02785		SMIM2	13	44717286	44735393	0.00682364	0.0722011	0.030303	0.787879	0.181818	-2.21166	-0.424955	-2.12303	-1.6319
BNIP1	5	172571444	172591390	+	0.0106885	0.26338	0.424242	0.575758	0	0.786697	0.192589	NA	0.594107		VAPA	18	9913954	9960018	0.00693427	0.0722011	0	0.363636	0.636364	NA	0.36074	-0.868713	-1.22945
COPS4	4	83956238	83996971	+	0.0110202	0.26864	0.363636	0.636364	0	1.04241	0.508306	NA	0.534109		ZER1	9	131492064	131534213	0.00697832	0.0722011	0	0.848485	0.151515	NA	-0.111965	-0.999266	-0.887301
PROM1	4	15969848	16077741	-	0.0110878	0.26864	0.484848	0.515152	0	-0.22943	-2.07384	NA	1.84441		ABCA2	9	139901685	139922740	0.00699945	0.0722011	0	0.848485	0.151515	NA	1.66052	0.408935	-1.25158
PGM2	4	37828281	37864559	+	0.0111682	0.26864	0.484848	0.515152	0	0.0181465	-0.490478	NA	0.508625		COG3	13	46039029	46110833	0.00707345	0.0722011	0.030303	0.787879	0.181818	0.721535	0.0775219	-0.945638	-1.04701
BRF1	14	105675622	105781914	-	0.0112028	0.26864	0.333333	0.666667	0	1.40351	0.881474	NA	0.522034		TMEM241	18	20875976	21017933	0.00710553	0.0722011	0	0.363636	0.636364	NA	-0.112249	-0.722997	-0.610748
TMCO6	5	140019011	140024993	+	0.0113584	0.269563	0.454545	0.545455	0	1.16253	0.379886	NA	0.78264		LMO7	13	76194569	76434006	0.00711918	0.0722011	0.030303	0.787879	0.181818	-0.97828	-0.646973	-2.56487	-1.90562
B4GALT7	5	177027118	177037348	+	0.0113921	0.269563	0.424242	0.575758	0	1.07487	0.388458	NA	0.686408		PTGES2	9	130882971	130890467	0.00712116	0.0722011	0	0.848485	0.151515	NA	0.923767	0.20628	-0.717487
TNKS2	10	93558150	93625232	+	0.0115012	0.270354	0.212121	0.787879	0	0.834146	0.14443	NA	0.689716		STK24	13	99102452	99229405	0.00718357	0.0722011	0.030303	0.787879	0.181818	0.580294	-0.00306047	-2.72534	-2.74389
OXT	20	3052265	3053163	+	0.011882	0.276532	0.515152	0.484848	0	-1.03515	0.625275	NA	-1.66043		FLT1	13	28874482	29069265	0.00719196	0.0722011	0.030303	0.818182	0.151515	0.0647061	0.63648	1.28957	0.673516
COL25A1	4	109731876	110223523	-	0.0120049	0.276532	0.424242	0.575758	0	1.55165	-0.766846	NA	2.3185		ZC3H12B	X	64708614	64727767	0.00724365	0.0722011	0.0606061	0.636364	0.30303	0.095871	0.554532	-0.765572	-1.28022
TMEM106B	7	12250847	12276890	+	0.0121013	0.276532	0.272727	0.727273	0	0.622165	-0.413275	NA	1.03544		ODF2	9	131217433	131257119	0.00727644	0.0722011	0	0.848485	0.151515	NA	0.432985	-0.371616	-0.804601
GRK5	10	120967196	121215131	+	0.0121394	0.276532	0.212121	0.787879	0	-1.35273	-0.574691	NA	-0.778037		RABEPK	9	127962820	127996438	0.00733193	0.0722853	0	0.848485	0.151515	NA	0.611866	-0.53139	-1.14326
COPG2	7	130146078	130353598	-	0.012151	0.276532	0.272727	0.727273	0	1.31135	0.662955	NA	0.648396		TNFSF13B	13	108921976	108960832	0.00757776	0.0733124	0.030303	0.787879	0.181818	-0.114177	-0.596164	-1.86755	-1.28924
DNMT3B	20	31350190	31397162	+	0.012503	0.282743	0.515152	0.484848	0	1.12612	0.218405	NA	0.907713		CCDC122	13	44410487	44453826	0.00758168	0.0733124	0.030303	0.787879	0.181818	1.93855	0.587207	-0.240914	-0.87817
PDRG1	20	30532757	30539883	-	0.0126693	0.284701	0.545455	0.454545	0	0.69856	0.400432	NA	0.298128		LRSAM1	9	130213764	130265780	0.00758197	0.0733124	0	0.848485	0.151515	NA	0.772253	0.0595259	-0.712727
NCAPG2	7	158423860	158497522	-	0.0127629	0.285011	0.30303	0.69697	0	1.26607	0.0468186	NA	1.21925		TXNL1	18	54270052	54305920	0.00764425	0.0733124	0	0.363636	0.636364	NA	0.21785	-0.441883	-0.659733
ZDHHC4	7	6617064	6628610	+	0.0130324	0.289222	0.272727	0.727273	0	0.861113	0.387096	NA	0.474017		INVS	9	102861466	103064457	0.00770692	0.0733124	0	0.848485	0.151515	NA	0.10346	-0.807483	-0.910943
FUT11	10	75532048	75535977	+	0.0134339	0.296292	0.212121	0.787879	0	1.69736	0.973328	NA	0.724028		NCBP1	9	100395704	100436030	0.0077743	0.0733124	0	0.848485	0.151515	NA	0.231216	-0.388726	-0.619942
BOD1L1	4	13570365	13629328	-	0.013588	0.296628	0.424242	0.575758	0	-0.0425921	-0.533224	NA	0.490632		NUDT15	13	48611702	48615638	0.00784851	0.0733124	0.030303	0.727273	0.242424	-0.150178	-0.285096	-1.05507	-0.775372
FIGNL1	7	50505017	50518104	-	0.0136152	0.296628	0.212121	0.787879	0	-0.106859	-0.789443	NA	0.682584		TEX10	9	103064356	103114853	0.0078649	0.0733124	0	0.848485	0.151515	NA	0.549842	-0.0246095	-0.574452
ACTR3B	7	152456833	152552464	+	0.0138374	0.299643	0.272727	0.727273	0	1.9615	1.19467	NA	0.766838		C9orf142	9	139886869	139888440	0.00786511	0.0733124	0	0.848485	0.151515	NA	0.513401	-0.0485684	-0.56197
MAFB	20	39314487	39317880	-	0.0140804	0.303068	0.515152	0.484848	0	-0.277822	-0.891454	NA	0.613632		MLANA	9	5890908	5909822	0.00813212	0.0750838	0	0.818182	0.181818	NA	0.148907	-0.827266	-0.976172
MRFAP1L1	4	6709427	6711606	-	0.0142964	0.303924	0.454545	0.545455	0	1.45091	0.725917	NA	0.724996		FRMPD1	9	37651051	37746901	0.00820824	0.0750838	0	0.848485	0.151515	NA	0.985424	-2.32891	-3.31433
SFRP5	10	99526507	99531756	-	0.0144021	0.303924	0.212121	0.787879	0	-6.34687	-2.63181	NA	-3.71506		NAA35	9	88556056	88637213	0.00822618	0.0750838	0	0.818182	0.181818	NA	-0.0465489	-0.806059	-0.75951
ZC2HC1C	14	75536279	75546690	+	0.0144104	0.303924	0.363636	0.636364	0	1.99711	1.31974	NA	0.67737		ELF1	13	41506054	41556418	0.00825899	0.0750838	0.030303	0.757576	0.212121	-0.62382	0.121223	-0.937501	-1.03007
SEC31B	10	102246402	102279595	-	0.0145664	0.303924	0.212121	0.787879	0	1.38432	-0.361197	NA	1.74551		ESD	13	47345390	47371367	0.00831331	0.0750838	0.030303	0.727273	0.242424	0.405461	0.167279	-0.332684	-0.50949
SRA1	5	139929651	139937041	-	0.0147078	0.303924	0.454545	0.545455	0	1.46689	0.270976	NA	1.19592		ZNF462	9	109625377	109775915	0.00834807	0.0750838	0	0.818182	0.181818	NA	0.640536	-0.714876	-1.35541
WHSC1	4	1873150	1983934	+	0.0147139	0.303924	0.424242	0.575758	0	0.812761	0.320736	NA	0.492025		KBTBD7	13	41765526	41768711	0.00865163	0.0769641	0.030303	0.757576	0.212121	2.25436	1.18809	0.563418	-0.665677
CNOT4	7	135046546	135194875	-	0.0147156	0.303924	0.272727	0.727273	0	0.874376	0.436375	NA	0.438		CCDC107	9	35658286	35661500	0.00865721	0.0769641	0	0.818182	0.181818	NA	0.389878	-0.123439	-0.513317
PDLIM4	5	131593350	131609147	+	0.0149516	0.307023	0.393939	0.575758	0.030303	-1.39065	0.610706	-1.42647	-1.8995		NUP188	9	131709971	131769375	0.00887423	0.0782538	0	0.848485	0.151515	NA	0.501231	-0.255074	-0.756305
CCNG2	4	78078356	78091213	+	0.0153112	0.31016	0.424242	0.575758	0	0.207859	-0.729529	NA	0.937388		GRTP1	13	113978478	114018463	0.00890404	0.0782538	0.0909091	0.727273	0.181818	-0.0288187	-1.29145	-2.54566	-1.39449
RSBN1L	7	77325742	77409120	+	0.0154818	0.31016	0.242424	0.757576	0	0.667329	0.00232452	NA	0.665005		RAB20	13	111175412	111214084	0.00899915	0.0786403	0.0606061	0.757576	0.181818	0.484866	-0.480179	-2.55227	-2.14358
MAD1L1	7	1855427	2272583	-	0.0155194	0.31016	0.272727	0.727273	0	2.1234	1.41507	NA	0.708326		TMEM245	9	111777414	111882225	0.00914	0.0794199	0	0.848485	0.151515	NA	-0.076414	-1.40603	-1.32962
FAM185A	7	102389398	102449672	+	0.0155639	0.31016	0.242424	0.727273	0.030303	0.308468	-0.00960141	-0.144593	0.323469		SNAPC3	9	15422781	15461627	0.00945284	0.0812314	0	0.818182	0.181818	NA	-0.033745	-1.08211	-1.04836
PPP2R2B	5	145969066	146258348	-	0.0156127	0.31016	0.393939	0.606061	0	2.46794	1.20533	NA	1.26261		UCK1	9	134399182	134406662	0.00949035	0.0812314	0	0.848485	0.151515	NA	0.904577	-0.0785013	-0.983078
PURA	5	139493707	139499001	+	0.0157515	0.31016	0.424242	0.575758	0	0.734466	0.329857	NA	0.404609		CEP192	18	12991360	13125052	0.00950692	0.0812314	0	0.363636	0.636364	NA	-0.296115	-1.0324	-0.736285
AKAP3	12	4724673	4758213	-	0.0157663	0.31016	0.151515	0.848485	0	1.03823	0.0214787	NA	1.01675		PCCA	13	100741268	101182691	0.00956107	0.0812427	0.030303	0.787879	0.181818	-0.017984	-0.0801813	-1.24061	-1.16273
TBCK	4	106965473	107237423	-	0.0157988	0.31016	0.424242	0.575758	0	0.899864	0.331364	NA	0.5685		SURF6	9	136197542	136203047	0.00970256	0.081992	0	0.848485	0.151515	NA	-0.12143	-0.852368	-0.730938
ABLIM3	5	148521009	148640002	+	0.016047	0.310913	0.393939	0.606061	0	2.72966	1.71654	NA	1.01313		C9orf117	9	130469270	130476303	0.00986875	0.0829407	0	0.848485	0.151515	NA	2.61148	1.59476	-1.01672
DCP2	5	112312406	112357892	+	0.0160726	0.310913	0.424242	0.575758	0	-0.0652699	-0.601156	NA	0.535886		MAMDC4	9	139746818	139755251	0.010165	0.084966	0	0.848485	0.151515	NA	-1.13579	-3.2911	-2.15531
ANKHD1	5	139781398	139919441	+	0.0160982	0.310913	0.424242	0.575758	0	0.575168	0.249855	NA	0.325313		DIS3	13	73329539	73356266	0.0104127	0.0865659	0.0606061	0.757576	0.181818	0.520396	-0.0890295	-0.686605	-0.642718
SMIM14	4	39548916	39628717	-	0.0162844	0.311487	0.484848	0.515152	0	0.769983	0.389844	NA	0.380139		MCF2L	13	113623534	113754053	0.0108351	0.0895269	0.0909091	0.727273	0.181818	2.56386	2.11971	1.14379	-1.02527
TCERG1	5	145826872	145891069	+	0.0163023	0.311487	0.393939	0.606061	0	0.607089	-0.239127	NA	0.846216		IKBKAP	9	111629796	111696612	0.0109268	0.0895269	0	0.848485	0.151515	NA	0.985997	0.146858	-0.839139
PRKDC	8	48685668	48872743	-	0.0165047	0.313677	0.151515	0.848485	0	0.537913	-0.0979996	NA	0.635913		CDK5RAP2	9	123151146	123342448	0.0109614	0.0895269	0	0.848485	0.151515	NA	0.250551	-0.839392	-1.08994
CENPH	5	68485374	68506184	+	0.0167114	0.315925	0.424242	0.575758	0	0.0209571	-0.914809	NA	0.935766		MED4	13	48649863	48669277	0.0110017	0.0895269	0.030303	0.727273	0.242424	0.141406	-0.0593125	-0.626599	-0.575315
PHYH	10	13319795	13341746	-	0.0168179	0.316265	0.212121	0.787879	0	0.141673	-0.708288	NA	0.84996		EXD3	9	140201345	140317714	0.0111102	0.0899342	0	0.848485	0.151515	NA	-0.285042	-1.07791	-0.792872
IDH3B	20	2639035	2644869	-	0.0175788	0.325166	0.515152	0.484848	0	0.134727	-0.258741	NA	0.393467		ELP2	18	33709836	33757885	0.0112807	0.0908361	0	0.363636	0.636364	NA	0.467665	-0.201606	-0.669272
EBF4	20	2673523	2740754	+	0.0176293	0.325166	0.515152	0.484848	0	2.5009	1.40804	NA	1.09287		MTIF3	13	28009775	28024326	0.0116171	0.0926381	0.0606061	0.757576	0.181818	0.0333652	0.223167	-1.38115	-1.59026
PDS5A	4	39824482	39979576	-	0.0177424	0.325166	0.484848	0.515152	0	0.307114	-0.16599	NA	0.473104		ALOX5AP	13	31287614	31338565	0.0116249	0.0926381	0.030303	0.787879	0.181818	-2.18418	-0.679302	-2.41785	-1.68281
FAM24B	10	124608609	124639157	-	0.0177993	0.325166	0.212121	0.787879	0	0.989037	-0.349168	NA	1.3382		ZBTB43	9	129567284	129600489	0.0119924	0.0943109	0	0.848485	0.151515	NA	-0.0368123	-1.04683	-1.01002
TRIM24	7	138145078	138270333	+	0.0179746	0.325166	0.30303	0.69697	0	1.34686	0.444864	NA	0.901995		AMER1	X	63404996	63425624	0.0119947	0.0943109	0.0909091	0.575758	0.333333	-0.463706	-0.164487	-0.772882	-0.567593
CDC25B	20	3767418	3786768	+	0.0180698	0.325166	0.515152	0.484848	0	0.884017	0.134465	NA	0.749552		PHLPP1	18	60382671	60647676	0.0120435	0.0943109	0	0.363636	0.636364	NA	-0.59909	-1.45704	-0.857949
CATSPERB	14	92047117	92198430	-	0.0181018	0.325166	0.363636	0.636364	0	-1.17243	0.104158	NA	-1.27659		AUH	9	93976096	94124206	0.0120801	0.0943109	0	0.818182	0.181818	NA	-0.175989	-0.893616	-0.717626
ORC5	7	103766787	103848495	-	0.0181659	0.325166	0.272727	0.727273	0	0.652434	0.162788	NA	0.489646		OTUD5	X	48779300	48814893	0.0121539	0.0944079	0	0.636364	0.363636	NA	0.773777	-0.0501428	-0.82392
MTMR9	8	11141999	11185655	+	0.018308	0.325166	0.181818	0.818182	0	1.28896	0.434519	NA	0.85444		TDRD3	13	60970590	61148013	0.0123724	0.0956221	0.030303	0.787879	0.181818	0.108818	0.0777869	-0.730004	-0.80894
NEURL2	20	44517110	44519926	-	0.0184344	0.325166	0.515152	0.484848	0	0.846705	0.0223076	NA	0.824397		CACNA1B	9	140772240	141019076	0.0128065	0.0984823	0	0.848485	0.151515	NA	4.22578	2.48239	-1.74339
COL26A1	7	101006100	101202304	+	0.0184682	0.325166	0.242424	0.757576	0	5.35415	1.72008	NA	3.63406		WNK2	9	95947211	96081655	0.0129059	0.0987527	0	0.818182	0.181818	NA	0.0377002	-1.69198	-1.72968
UFSP2	4	186320693	186347139	-	0.0185902	0.325166	0.454545	0.545455	0	0.178751	-0.203278	NA	0.382029		NUFIP1	13	45513383	45563613	0.0129729	0.098774	0.030303	0.787879	0.181818	0.735628	0.355037	-0.145669	-0.514801
PCIF1	20	44563316	44576662	+	0.0186655	0.325166	0.515152	0.484848	0	0.949269	0.152734	NA	0.796535		C18orf25	18	43753987	43846955	0.0133318	0.101006	0	0.363636	0.636364	NA	0.0970472	-0.488717	-0.585764
METTL3	14	21966274	21979517	-	0.0187517	0.325166	0.363636	0.636364	0	0.882329	0.10406	NA	0.778269		PSPC1	13	20248891	20357159	0.0136479	0.10219	0.0606061	0.757576	0.181818	1.06197	0.583813	-0.209569	-0.828801
POLR3A	10	79734906	79789298	-	0.0187633	0.325166	0.212121	0.787879	0	1.64871	1.08979	NA	0.558919		DDX10	11	108535751	108811657	0.013664	0.10219	0	0.848485	0.151515	NA	0.781	0.0418139	-0.739186
ZNF141	4	331595	367691	+	0.0188118	0.325166	0.454545	0.545455	0	0.972463	0.411974	NA	0.560489		LACC1	13	44453419	44468068	0.013752	0.10219	0.030303	0.787879	0.181818	-1.36799	-0.691353	-2.08783	-1.37141
TRPC7	5	135548998	135701164	-	0.0188383	0.325166	0.393939	0.606061	0	3.30626	1.80985	NA	1.49641		STX17	9	102668914	102736818	0.0137719	0.10219	0	0.848485	0.151515	NA	-0.568999	-1.71724	-1.14824
FIP1L1	4	54243819	54326103	+	0.0191474	0.328681	0.424242	0.575758	0	0.535282	0.173673	NA	0.361608		PIAS2	18	44383186	44497495	0.0138652	0.10219	0	0.363636	0.636364	NA	0.207707	-0.483903	-0.69161
RBBP8NL	20	60985292	61002629	-	0.0192699	0.328681	0.575758	0.424242	0	-5.13481	-2.21989	NA	-2.91493		CERCAM	9	131181438	131199630	0.0138866	0.10219	0	0.848485	0.151515	NA	-0.167179	-1.71207	-1.5449
CSTF2T	10	53455245	53459355	-	0.0193179	0.328681	0.212121	0.787879	0	0.811012	0.373081	NA	0.437931		USP12	13	27640286	27746033	0.0139806	0.102391	0.0606061	0.757576	0.181818	-0.426404	-0.0480448	-1.02691	-0.950835
CHGB	20	5891973	5906007	+	0.0194118	0.328712	0.515152	0.484848	0	6.65791	8.25817	NA	-1.60026		XPA	9	100437190	100459691	0.0141078	0.102833	0	0.848485	0.151515	NA	0.151428	-0.746383	-0.897811
NPM3	10	103541081	103543170	-	0.0196385	0.330608	0.181818	0.818182	0	1.91395	0.58611	NA	1.32784		METTL4	18	2537523	2571502	0.014286	0.103641	0	0.363636	0.636364	NA	-0.103479	-0.810421	-0.706942
ELOVL6	4	110970228	111119771	-	0.0198341	0.330608	0.424242	0.575758	0	1.14246	0.462036	NA	0.68042		UBAP1	9	34179002	34252521	0.0145142	0.104802	0	0.818182	0.181818	NA	-0.0765488	-0.667102	-0.590553
SDR39U1	14	24908971	24912007	-	0.0198351	0.330608	0.363636	0.636364	0	1.3525	0.442813	NA	0.909684		SMAD9	13	37418967	37494409	0.0145962	0.104902	0.030303	0.757576	0.212121	1.43269	-0.677747	0.932799	1.52937
EXD2	14	69658193	69710737	+	0.0198938	0.330608	0.363636	0.636364	0	1.00181	0.484583	NA	0.517223		CTDP1	18	77439800	77514510	0.0149261	0.106401	0.030303	0.363636	0.606061	-0.159824	-0.244223	-0.746365	-0.508634
FAF2	5	175875355	175937075	+	0.0201791	0.333795	0.424242	0.575758	0	0.688243	0.380669	NA	0.307574		TUBGCP3	13	113139318	113242499	0.0149432	0.106401	0.0909091	0.727273	0.181818	-0.44009	-0.185791	-0.657777	-0.44373
DTD2	14	31915241	31926680	-	0.0203575	0.334082	0.393939	0.606061	0	0.540029	0.27568	NA	0.264349		CAAP1	9	26840682	26892826	0.0151343	0.106805	0	0.818182	0.181818	NA	-0.301476	-0.930207	-0.628731
GEMIN2	14	39583487	39606177	+	0.0205328	0.334082	0.393939	0.606061	0	0.760419	0.248693	NA	0.511725		PDCL	9	125580375	125590935	0.0151387	0.106805	0	0.848485	0.151515	NA	0.456317	-0.325089	-0.781406
PLA2G12B	10	74694519	74714577	-	0.0207784	0.334082	0.242424	0.757576	0	-6.35009	-2.57523	NA	-3.77486		PARD6G	18	77915114	78005397	0.0157338	0.110496	0.0606061	0.393939	0.545455	-0.695355	0.0524958	-1.01486	-0.967639
METTL2B	7	128116782	128142978	+	0.0208158	0.334082	0.272727	0.727273	0	0.979082	0.2912	NA	0.687883		ACAT1	11	107992257	108018895	0.0165844	0.11594	0	0.848485	0.151515	NA	0.0519147	-0.748356	-0.800271
COPS5	8	67955313	67974562	-	0.0208734	0.334082	0.151515	0.848485	0	0.0983151	-0.564357	NA	0.662672		CDR1	X	139865424	139866723	0.0168309	0.116865	0	0.666667	0.333333	NA	-0.181391	-1.59215	-1.41076
UVSSA	4	1341053	1381837	+	0.0210852	0.334082	0.424242	0.575758	0	0.483326	-0.381476	NA	0.864801		TOMM5	9	37588409	37592636	0.0168963	0.116865	0	0.848485	0.151515	NA	0.196744	-0.642934	-0.839678
FRYL	4	48499379	48782316	-	0.0211507	0.334082	0.484848	0.515152	0	-0.235204	-0.78056	NA	0.545356		PCID2	13	113831852	113862962	0.0169672	0.116865	0.0909091	0.727273	0.181818	0.454039	0.277457	-1.31961	-1.61668
MAT1A	10	82031575	82049434	-	0.0211551	0.334082	0.212121	0.787879	0	2.50002	6.51641	NA	-4.01639		ALG5	13	37523906	37573504	0.0171073	0.116865	0.030303	0.757576	0.212121	0.17037	0.0809317	-0.69205	-0.776422
L2HGDH	14	50709151	50778947	-	0.0211943	0.334082	0.393939	0.606061	0	0.546652	0.0772955	NA	0.469357		ZCCHC7	9	37120468	37358146	0.0171646	0.116865	0	0.818182	0.181818	NA	-0.0793588	-0.8855	-0.806142
PLEK2	14	67853695	67878917	-	0.0212338	0.334082	0.393939	0.606061	0	-3.40301	-0.68773	NA	-2.71528		FBXW2	9	123519253	123555740	0.0173039	0.116865	0	0.848485	0.151515	NA	-0.39091	-1.12249	-0.73158
FAM193A	4	2627158	2734302	+	0.0213064	0.334082	0.424242	0.575758	0	0.621998	0.280547	NA	0.341451		SWI5	9	131037657	131051268	0.0174165	0.116865	0	0.848485	0.151515	NA	0.712871	0.145324	-0.567547
ZKSCAN1	7	99613174	99639312	+	0.0213184	0.334082	0.212121	0.787879	0	4.86792	0.867233	NA	4.00068		TJP2	9	71736179	71870124	0.0174181	0.116865	0	0.818182	0.181818	NA	-0.391726	-1.42422	-1.03249
MCM7	7	99690350	99698403	-	0.0217083	0.338707	0.212121	0.787879	0	0.450263	-0.236268	NA	0.686531		CAMSAP1	9	138700332	138799005	0.017462	0.116865	0	0.848485	0.151515	NA	0.863625	-0.0850516	-0.948677
CLOCK	4	56294067	56412099	-	0.0219463	0.340931	0.424242	0.575758	0	0.952168	0.366341	NA	0.585827		PIGO	9	35088684	35096546	0.017532	0.116865	0	0.818182	0.181818	NA	0.822236	0.176091	-0.646145
EXOC3	5	443333	467411	+	0.0224873	0.346327	0.484848	0.515152	0	0.668666	0.102066	NA	0.5666		PBX3	9	128509616	128729656	0.0175526	0.116865	0	0.848485	0.151515	NA	0.927692	0.00857634	-0.919116
MARK3	14	103851700	103970168	+	0.0224875	0.346327	0.393939	0.606061	0	0.685007	0.210905	NA	0.474103		ZBTB34	9	129622943	129648157	0.0176636	0.117098	0	0.848485	0.151515	NA	-0.0818644	-0.808505	-0.726641
MANBA	4	103552642	103682151	-	0.0228745	0.348563	0.424242	0.575758	0	0.586947	0.14895	NA	0.437997		RTTN	18	67671039	67872962	0.0180195	0.118944	0.030303	0.333333	0.636364	-0.344567	0.0903874	-0.594504	-0.648645
TUBAL3	10	5435060	5446793	-	0.0228827	0.348563	0.242424	0.757576	0	-6.17575	-2.75774	NA	-3.418		TLE4	9	82186687	82341797	0.0181199	0.119096	0	0.818182	0.181818	NA	-1.39079	-2.87463	-1.48383
IQSEC3	12	176048	287626	+	0.0229254	0.348563	0.151515	0.848485	0	4.30226	3.56227	NA	0.739989		CAB39L	13	49882785	49975674	0.0186124	0.121349	0.0606061	0.69697	0.242424	-1.56544	-1.21417	-0.260379	0.981896
NFXL1	4	47849249	47916574	-	0.0230494	0.348964	0.484848	0.515152	0	0.633848	0.17903	NA	0.454818		ZDHHC21	9	14611068	14693480	0.0186205	0.121349	0	0.818182	0.181818	NA	-0.792994	-2.29579	-1.5028
EMC9	14	24608173	24610797	-	0.0232076	0.349877	0.363636	0.636364	0	1.07126	0.305834	NA	0.765425		GGACT	13	101182417	101241046	0.0189177	0.122765	0.030303	0.787879	0.181818	-1.14245	-0.670008	-3.00093	-2.31342
TINF2	14	24708848	24711880	-	0.0233826	0.350711	0.363636	0.636364	0	2.20443	-0.721971	NA	2.9264		DACH1	13	72012097	72441330	0.0191072	0.123474	0.030303	0.787879	0.181818	3.05624	1.62673	0.314293	-1.36538
C5orf34	5	43486802	43515273	-	0.0234593	0.350711	0.454545	0.545455	0	0.666807	-0.449737	NA	1.11654		PIBF1	13	73356229	73590592	0.0195294	0.124427	0.0606061	0.757576	0.181818	0.851835	0.241761	-0.500801	-0.787753
NDST1	5	149877339	149937773	+	0.0236076	0.351458	0.393939	0.606061	0	1.02625	0.293295	NA	0.732954		FAM129B	9	130267616	130331396	0.0195416	0.124427	0	0.848485	0.151515	NA	-0.0286423	-0.990304	-0.961662
FBXW7	4	153242409	153456185	-	0.0237808	0.352567	0.424242	0.575758	0	1.26197	0.431504	NA	0.830467		FAM102A	9	130702860	130712993	0.0195939	0.124427	0	0.848485	0.151515	NA	-0.918943	-2.01765	-1.09871
ZDHHC2	8	17013835	17080241	+	0.02393	0.353314	0.151515	0.848485	0	1.70366	0.38229	NA	1.32137		SMC5	9	72873877	72969789	0.0197056	0.124427	0	0.818182	0.181818	NA	-0.532737	-1.34165	-0.808915
SRD5A1	5	6633434	6669675	+	0.0241465	0.355044	0.454545	0.545455	0	1.17212	0.274877	NA	0.897239		FAM210A	18	13663345	13726591	0.0197482	0.124427	0	0.363636	0.636364	NA	-0.713477	-1.20015	-0.48667
TRIM8	10	104404251	104418076	+	0.0248342	0.361643	0.212121	0.787879	0	0.923162	0.119431	NA	0.803731		STS	X	7065292	7272684	0.0197552	0.124427	0	0.666667	0.333333	NA	0.0377805	-0.540399	-0.57818
TIAL1	10	121332976	121356541	-	0.0250307	0.361643	0.212121	0.787879	0	0.639598	-0.0180466	NA	0.657644		ZNF407	18	72342918	72516583	0.0199454	0.124427	0.030303	0.333333	0.636364	0.151699	0.113031	-0.559125	-0.675378
YWHAB	20	43514239	43537173	+	0.025059	0.361643	0.515152	0.484848	0	-0.159491	1.23426	NA	-1.39375		DDX3X	X	41192560	41209540	0.0199548	0.124427	0	0.636364	0.363636	NA	-0.829438	0.152453	0.981891
FNIP2	4	159690146	159829202	+	0.0251407	0.361643	0.424242	0.575758	0	1.88372	1.41845	NA	0.465268		WDR45	X	48932091	48937564	0.0199828	0.124427	0	0.636364	0.363636	NA	-0.054284	0.731189	0.785473
ACOT2	14	74034323	74042362	+	0.025227	0.361643	0.363636	0.636364	0	0.411013	0.00266182	NA	0.408351		GKAP1	9	86354335	86432752	0.0202385	0.125308	0	0.818182	0.181818	NA	0.803297	0.108329	-0.694968
FTSJ2	7	2273865	2281840	-	0.0252688	0.361643	0.272727	0.727273	0	0.741746	0.342894	NA	0.398853		VPS4B	18	61056422	61089752	0.0202872	0.125308	0	0.363636	0.636364	NA	-0.318772	-0.921823	-0.603051
CCNB1IP1	14	20779526	20801471	-	0.0255498	0.361643	0.363636	0.636364	0	-1.01128	-0.207254	NA	-0.804031		DAB2IP	9	124329380	124547809	0.0204987	0.125729	0	0.848485	0.151515	NA	-1.50539	-2.51137	-1.00598
PACRGL	4	20697904	20754523	+	0.0256268	0.361643	0.484848	0.515152	0	0.585065	0.102094	NA	0.48297		TPM2	9	35681989	35690053	0.0205189	0.125729	0	0.818182	0.181818	NA	-1.78432	-4.67621	-2.89189
SFR1	10	105881815	105886143	+	0.0256874	0.361643	0.212121	0.787879	0	0.207291	-0.453147	NA	0.660437		MIPEP	13	24304327	24463587	0.0206005	0.125729	0.0909091	0.727273	0.181818	-0.557474	-0.535259	-1.64779	-1.11006
PPARGC1A	4	23793643	24474452	-	0.0257063	0.361643	0.484848	0.515152	0	-3.1986	-1.65694	NA	-1.54167		APLN	X	128779235	128788933	0.020907	0.126838	0	0.636364	0.363636	NA	2.34198	1.10767	-1.2343
POC5	5	74970022	75008280	-	0.0258537	0.361643	0.454545	0.545455	0	0.502437	0.0231575	NA	0.479279		MAN1B1	9	139981378	140003639	0.0209473	0.126838	0	0.848485	0.151515	NA	0.689125	-0.0995841	-0.788709
VCPIP1	8	67542487	67579452	-	0.0259634	0.361643	0.151515	0.848485	0	0.40631	-0.23578	NA	0.64209		GALT	9	34646585	34650595	0.0211496	0.127085	0	0.818182	0.181818	NA	-0.00279195	-1.17946	-1.17667
GNG2	14	52327021	52436518	+	0.0259653	0.361643	0.393939	0.606061	0	-2.0698	0.808312	NA	-2.87811		POLR1D	13	28194879	28241559	0.0211532	0.127085	0.0606061	0.757576	0.181818	0.830595	0.0685823	-0.749157	-0.874185
DCAF16	4	17795070	17812381	-	0.0260957	0.361643	0.484848	0.515152	0	1.69347	1.15043	NA	0.543045		VLDLR	9	2621773	2656103	0.0212522	0.127182	0	0.818182	0.181818	NA	0.876409	-1.37973	-2.25614
TAF6	7	99704692	99716995	-	0.0261136	0.361643	0.212121	0.787879	0	1.29025	0.78508	NA	0.505169		CDC14B	9	99262394	99382112	0.0217346	0.129565	0	0.848485	0.151515	NA	-0.616143	-1.36373	-0.747585
KAT6A	8	41786996	41909544	-	0.026551	0.365736	0.151515	0.848485	0	1.14152	-0.130595	NA	1.27211		APOOL	X	84258897	84348323	0.0220248	0.129976	0	0.666667	0.333333	NA	0.440073	-0.0388078	-0.478881
CEP72	5	612404	653668	+	0.0266667	0.365736	0.484848	0.515152	0	0.999133	0.443601	NA	0.555531		ANP32B	9	100745488	100778225	0.022063	0.129976	0	0.848485	0.151515	NA	0.0590387	-0.544036	-0.603075
REC8	14	24641233	24649463	+	0.0267163	0.365736	0.363636	0.636364	0	3.59189	2.55585	NA	1.03604		RC3H2	9	125611731	125667562	0.0220982	0.129976	0	0.848485	0.151515	NA	0.475869	-0.351338	-0.827206
NFKB2	10	104153866	104162286	+	0.0268685	0.366417	0.212121	0.787879	0	0.362332	-0.397789	NA	0.760121		COL4A1	13	110801304	110959504	0.0222036	0.129976	0.0606061	0.757576	0.181818	-1.18602	-0.0603987	1.1427	1.28647
SNCA	4	90645249	90758127	-	0.0272177	0.368891	0.424242	0.575758	0	-0.258828	-2.11124	NA	1.85241		MPHOSPH8	13	20207787	20247599	0.022413	0.129976	0.0606061	0.757576	0.181818	0.472429	0.219868	-0.519765	-0.758341
OR2A7	7	143955788	143956721	-	0.0272792	0.368891	0.272727	0.727273	0	-3.26129	-1.34762	NA	-1.91366		CCDC183	9	139690789	139702193	0.0224349	0.129976	0	0.848485	0.151515	NA	2.60148	1.66701	-0.934477
PLAT	8	42032235	42065242	-	0.0276084	0.368891	0.151515	0.848485	0	1.0743	-0.540885	NA	1.61519		CEP76	18	12661954	12702776	0.0224351	0.129976	0	0.363636	0.636364	NA	-0.313253	-0.793707	-0.480453
ISPD	7	16127151	16460947	-	0.027611	0.368891	0.272727	0.727273	0	1.16603	0.549239	NA	0.616792		SERPINE3	13	51915167	51936239	0.0224796	0.129976	0.0606061	0.69697	0.242424	-2.24235	-0.823169	-1.60085	-0.664143
CCM2	7	45039344	45116069	+	0.0276222	0.368891	0.242424	0.757576	0	1.21065	0.775561	NA	0.435089		FAM214B	9	35104117	35111371	0.0227014	0.13028	0	0.818182	0.181818	NA	-0.131723	-0.973061	-0.841339
GTPBP10	7	89975978	90020769	+	0.0276694	0.368891	0.242424	0.757576	0	0.833342	-0.0126853	NA	0.846028		ATP7B	13	52506804	52585630	0.0227016	0.13028	0.030303	0.727273	0.242424	-0.957373	-0.937848	-1.86312	-0.924489
SOX18	20	62679078	62680979	-	0.0278368	0.369059	0.575758	0.424242	0	0.285186	-1.49876	NA	1.78395		WDR34	9	131395939	131419129	0.0229146	0.130967	0	0.848485	0.151515	NA	0.199459	-1.09754	-1.297
IFIT3	10	91087575	91100725	+	0.0279977	0.369059	0.212121	0.787879	0	-2.15217	-0.859359	NA	-1.29281		SIGMAR1	9	34634718	34637823	0.0229916	0.130967	0	0.818182	0.181818	NA	0.349688	-0.658153	-1.00784
FBXL7	5	15500304	15939905	+	0.0280425	0.369059	0.424242	0.575758	0	2.54858	1.16914	NA	1.37944		CD72	9	35609975	35618424	0.0230779	0.130974	0	0.818182	0.181818	NA	0.0755318	1.66622	1.59069
PTK6	20	62159765	62168723	-	0.0280952	0.369059	0.575758	0.424242	0	-4.9032	-2.14166	NA	-2.76154		TMEM8B	9	35829221	35847232	0.0235873	0.133285	0	0.818182	0.181818	NA	0.971951	-0.00661444	-0.978565
MACROD2	20	13976145	16033842	+	0.0282514	0.369752	0.545455	0.454545	0	2.4932	1.43078	NA	1.06243		MZT1	13	73282494	73301938	0.0237273	0.133285	0.0606061	0.757576	0.181818	0.766287	0.471165	-0.256412	-0.749437
ZNF786	7	148766732	148787869	-	0.028615	0.372604	0.272727	0.727273	0	1.56581	0.783804	NA	0.78201		C18orf8	18	21083433	21111746	0.0237661	0.133285	0	0.363636	0.636364	NA	-0.297507	-0.913173	-0.615666
TMEM179	14	105057200	105071097	-	0.0286779	0.372604	0.393939	0.606061	0	5.06347	3.57267	NA	1.4908		PARP4	13	24995068	25086948	0.0238318	0.133285	0.0606061	0.757576	0.181818	-1.10588	-1.28621	-2.54608	-1.27322
MCCC2	5	70883114	70954531	+	0.0292701	0.376347	0.454545	0.545455	0	0.997777	0.0113178	NA	0.98646		ZNF484	9	95607312	95640320	0.0239737	0.133592	0	0.818182	0.181818	NA	0.518124	-0.340323	-0.858447
NPAS3	14	33408458	34273382	+	0.0293883	0.376347	0.393939	0.606061	0	-0.00892081	-1.37519	NA	1.36627		NUPL1	13	25875665	25916561	0.0241238	0.133841	0.0606061	0.757576	0.181818	0.65608	0.84561	-0.719001	-1.55057
STON2	14	81726993	81893556	-	0.0294044	0.376347	0.363636	0.636364	0	2.43975	1.78377	NA	0.655987		TTC39B	9	15170841	15250198	0.0241924	0.133841	0	0.818182	0.181818	NA	-0.985629	-1.73683	-0.751201
ERCC6	10	50662525	50747169	-	0.0295382	0.376347	0.242424	0.757576	0	1.26795	0.80762	NA	0.460335		GNA14	9	80037994	80263232	0.0244061	0.134418	0	0.818182	0.181818	NA	0.82482	-0.571599	-1.39642
ARG2	14	68086578	68118437	+	0.0296586	0.376347	0.363636	0.636364	0	-1.28732	-0.204073	NA	-1.08324		TDRD7	9	100174301	100258407	0.0244714	0.134418	0	0.848485	0.151515	NA	0.0397884	-0.779261	-0.81905
PHTF2	7	77428108	77553500	+	0.0297636	0.376347	0.242424	0.757576	0	0.564754	-0.41437	NA	0.979125		ING1	13	111364969	111373421	0.0252121	0.137532	0.0606061	0.757576	0.181818	-0.50322	-0.523266	-1.3939	-0.872123
HSPA9	5	137890570	137911318	-	0.0298473	0.376347	0.424242	0.575758	0	0.950606	0.514336	NA	0.43627		ZNF169	9	97021547	97064111	0.0252172	0.137532	0	0.818182	0.181818	NA	-0.565437	-2.09826	-1.53282
CDC25C	5	137620953	137667566	-	0.0298809	0.376347	0.424242	0.575758	0	-0.561611	-2.27098	NA	1.70937		DNAJC3	13	96329392	96447243	0.025646	0.139376	0.030303	0.787879	0.181818	-0.244466	-0.282916	-1.32859	-1.0471
ALDH7A1	5	125877532	125931082	-	0.0301071	0.376347	0.454545	0.545455	0	0.937543	0.600533	NA	0.337011		FREM1	9	14734663	14910993	0.026614	0.144128	0	0.818182	0.181818	NA	0.721494	-0.178831	-0.900325
PLEKHG4B	5	140372	190087	+	0.0303325	0.376347	0.484848	0.515152	0	2.24252	0.279351	NA	1.96317		INPP5E	9	139323066	139334274	0.0270618	0.145354	0	0.848485	0.151515	NA	0.32497	-0.429906	-0.754876
SUFU	10	104263718	104379220	+	0.0303384	0.376347	0.212121	0.787879	0	0.167582	-0.382458	NA	0.55004		C9orf129	9	96080480	96108696	0.0271766	0.145354	0	0.818182	0.181818	NA	0.284954	-0.282845	-0.567799
SRRM3	7	75831210	75916609	+	0.0303736	0.376347	0.212121	0.787879	0	3.70448	2.34672	NA	1.35776		UFM1	13	38923907	38937144	0.0272674	0.145354	0.030303	0.757576	0.212121	-0.475662	-0.705249	3.22619	3.92261
C1RL	12	7247145	7261874	-	0.0304832	0.376347	0.151515	0.848485	0	0.998152	-0.253408	NA	1.25156		FAM73B	9	131798899	131834361	0.0272812	0.145354	0	0.848485	0.151515	NA	-1.0236	-1.7809	-0.757299
PIGH	14	68056022	68067017	-	0.0305121	0.376347	0.363636	0.636364	0	0.379593	-0.0618499	NA	0.441443		MICU2	13	22066827	22178355	0.027313	0.145354	0.0909091	0.727273	0.181818	1.31545	0.816491	-0.0602538	-0.932184
MOCS2	5	52391508	52405602	-	0.0306651	0.376347	0.424242	0.575758	0	0.968893	0.3892	NA	0.579692		TLN1	9	35697333	35732392	0.0279988	0.14849	0	0.818182	0.181818	NA	-0.463581	-1.49981	-1.03623
PTPLA	10	17631957	17659373	-	0.0308391	0.376347	0.212121	0.787879	0	0.542584	-1.91247	NA	2.45505		POLE3	9	116169514	116172955	0.028308	0.149247	0	0.848485	0.151515	NA	-0.242348	-0.877658	-0.63531
RBM28	7	127950435	127983962	-	0.0308543	0.376347	0.272727	0.727273	0	1.17217	0.483265	NA	0.6889		IGFBPL1	9	38406524	38424444	0.0283356	0.149247	0	0.848485	0.151515	NA	2.35914	0.312089	-2.04705
FAXDC2	5	154198051	154230245	-	0.0308619	0.376347	0.393939	0.606061	0	3.86663	2.10017	NA	1.76646		CCNA1	13	37005966	37017019	0.0291617	0.153074	0.030303	0.757576	0.212121	3.48248	0.000259669	2.15756	2.02337
COMMD8	4	47452803	47465747	-	0.031163	0.378726	0.484848	0.515152	0	-0.294922	-0.853186	NA	0.558264		VPS13A	9	79792360	79997922	0.0294808	0.154075	0	0.818182	0.181818	NA	-0.226293	-1.33535	-1.10906
KLHL7	7	23145352	23215040	+	0.0314543	0.38097	0.272727	0.727273	0	0.482453	-0.243377	NA	0.725831		GDA	9	74729510	74867140	0.0295527	0.154075	0	0.818182	0.181818	NA	-4.60515	-2.73685	1.8683
NOP14	4	2939662	2965233	-	0.0315928	0.381355	0.424242	0.575758	0	0.852481	0.436772	NA	0.41571		SUPT20H	13	37583448	37633624	0.0297537	0.154179	0.030303	0.757576	0.212121	0.823278	-0.0293114	-0.610893	-0.614374
MAPRE1	20	31407698	31438211	+	0.031706	0.381433	0.515152	0.484848	0	0.289087	-0.0913928	NA	0.38048		WDR7	18	54318615	54697036	0.0297732	0.154179	0	0.363636	0.636364	NA	0.620048	0.175004	-0.445045
ZDHHC16	10	99205887	99217127	+	0.032176	0.385455	0.212121	0.787879	0	-1.08293	-0.0207448	NA	-1.06219		POSTN	13	38136718	38172981	0.0301674	0.15481	0.030303	0.757576	0.212121	-2.02748	-2.1359	-0.124888	2.00684
REEP5	5	112212080	112258031	-	0.0322561	0.385455	0.424242	0.575758	0	1.15102	0.569455	NA	0.581561		NDOR1	9	140100118	140113813	0.0301733	0.15481	0	0.848485	0.151515	NA	0.214351	-0.615274	-0.829625
FRA10AC1	10	95427639	95462329	-	0.0324153	0.386067	0.212121	0.787879	0	1.22288	0.510498	NA	0.712383		KLF9	9	72999512	73029573	0.0301969	0.15481	0	0.818182	0.181818	NA	0.356129	-0.640619	-0.996749
PEG10	7	94285636	94299007	+	0.0325642	0.386551	0.242424	0.757576	0	5.06828	3.06168	NA	2.0066		NIPSNAP3A	9	107509848	107522405	0.0304598	0.155639	0	0.848485	0.151515	NA	0.30209	-0.587035	-0.889125
BCCIP	10	127512103	127542264	+	0.0327543	0.38752	0.212121	0.757576	0.030303	0.621049	0.0775418	-1.00745	0.585237		CIZ1	9	130928343	130953868	0.0309908	0.157389	0	0.848485	0.151515	NA	0.2583	-0.817509	-1.07581
COQ2	4	84184976	84206067	-	0.0329698	0.387596	0.363636	0.636364	0	0.267181	-0.186533	NA	0.453714		HAUS1	18	43684297	43708299	0.0310071	0.157389	0	0.363636	0.636364	NA	-0.208696	-0.911008	-0.702312
SEL1L	14	81937890	82000205	-	0.0330329	0.387596	0.363636	0.636364	0	0.526388	0.151793	NA	0.374594		ZDHHC12	9	131483147	131486408	0.0312051	0.157873	0	0.848485	0.151515	NA	-0.0578175	-1.28302	-1.2252
PROSER2	10	11865396	11914276	+	0.0330862	0.387596	0.181818	0.818182	0	3.43238	1.89499	NA	1.53739		CARKD	13	111267880	111292340	0.0316707	0.159704	0.0606061	0.757576	0.181818	1.43163	0.825933	0.112365	-0.758435
C4orf46	4	159587826	159593202	-	0.0333807	0.389769	0.424242	0.575758	0	0.353204	-0.119958	NA	0.473163		TXN	9	113006091	113018920	0.0318413	0.160039	0	0.848485	0.151515	NA	-0.553153	-2.2155	-1.66235
ANAPC4	4	25378847	25420120	+	0.0335631	0.390622	0.454545	0.545455	0	0.599235	-0.202196	NA	0.80143		B4GALT6	18	29200998	29264686	0.0320365	0.160496	0	0.363636	0.636364	NA	-0.242539	-0.844417	-0.601879
LDB1	10	103866248	103880230	-	0.0336912	0.39084	0.212121	0.787879	0	1.75041	0.719648	NA	1.03076		PCDH17	13	58205788	58303065	0.0329789	0.16468	0.030303	0.757576	0.212121	2.95393	0.218908	2.02201	1.69791
CNOT7	8	17086736	17104126	-	0.0338901	0.391212	0.151515	0.848485	0	0.656679	0.202657	NA	0.454023		C9orf135	9	72435720	72521151	0.0334562	0.166185	0	0.818182	0.181818	NA	1.79908	-0.163616	-1.9627
RAB11FIP2	10	119764426	119806114	-	0.0339687	0.391212	0.212121	0.787879	0	0.755745	-0.0456073	NA	0.801353		AFG3L2	18	12328942	12377275	0.0334964	0.166185	0	0.363636	0.636364	NA	-0.913232	-1.42814	-0.51491
PITRM1	10	3179918	3214908	-	0.0340517	0.391212	0.242424	0.757576	0	1.07224	0.53902	NA	0.533222		RASL11A	13	27844463	27847827	0.0339483	0.167886	0.0606061	0.757576	0.181818	0.624571	-1.05726	-2.47535	-1.54267
MTA1	14	105886185	105937062	+	0.0344518	0.394539	0.181818	0.818182	0	0.767945	0.400452	NA	0.367494		KLHL9	9	21329669	21335431	0.0341646	0.168414	0	0.818182	0.181818	NA	0.222699	-0.499595	-0.722294
NDUFS6	5	1801495	1816165	+	0.0345861	0.394812	0.484848	0.515152	0	0.316895	-0.0448563	NA	0.361752		CCBL1	9	131595220	131644773	0.0347814	0.170907	0	0.848485	0.151515	NA	1.13783	0.423905	-0.713927
TIGD4	4	153690505	153700916	-	0.0349306	0.397474	0.424242	0.575758	0	1.75402	0.814347	NA	0.939676		RUSC2	9	35489829	35561895	0.035339	0.172502	0	0.818182	0.181818	NA	0.63518	-0.74932	-1.3845
MAD2L1	4	120980576	120988013	-	0.0351089	0.398235	0.424242	0.575758	0	-0.0875031	-1.37891	NA	1.29141		ATP9B	18	76829274	77138283	0.0353985	0.172502	0.030303	0.363636	0.606061	-0.473864	0.416152	-0.029247	-0.376937
TRIM50	7	72726531	72739579	-	0.035303	0.39917	0.242424	0.757576	0	-4.25708	-2.34056	NA	-1.91652		TRIM32	9	119449580	119463579	0.0354965	0.172502	0	0.848485	0.151515	NA	-0.505832	-1.13078	-0.624944
GEMIN5	5	154266975	154317776	-	0.0355207	0.400037	0.393939	0.606061	0	1.06176	0.592574	NA	0.469189		OPHN1	X	67262185	67653299	0.0356198	0.172502	0	0.636364	0.363636	NA	0.129975	-0.835226	-0.965201
BRD9	5	863849	892637	-	0.0356036	0.400037	0.484848	0.515152	0	0.468455	-0.0374503	NA	0.505905		GRIN1	9	140033608	140063214	0.0356845	0.172502	0	0.848485	0.151515	NA	0.277943	-3.06101	-3.33896
CLNK	4	10491837	10686386	-	0.0360143	0.400435	0.424242	0.575758	0	-0.798235	-1.86684	NA	1.0686		TPP2	13	103249285	103332308	0.035779	0.172502	0.030303	0.787879	0.181818	0.5095	-0.149833	-0.518469	-0.393056
OAT	10	126085871	126107545	-	0.0363625	0.400435	0.212121	0.787879	0	-3.62397	-2.50551	NA	-1.11847		RXRA	9	137218308	137332432	0.036214	0.173133	0	0.848485	0.151515	NA	0.507285	-0.914502	-1.42179
CCNA2	4	122737598	122745156	-	0.0364357	0.400435	0.424242	0.575758	0	-0.57922	-1.84197	NA	1.26276		CLYBL	13	100258917	100545018	0.0362529	0.173133	0.030303	0.787879	0.181818	-1.318	-0.689956	-1.40648	-0.69326
CRNKL1	20	20015004	20033136	-	0.0364603	0.400435	0.545455	0.454545	0	0.828403	0.547865	NA	0.280538		FAM155A	13	107820878	108519460	0.0363403	0.173133	0.030303	0.787879	0.181818	3.30692	0.241005	1.90919	1.55463
BCL11B	14	99635623	99738050	-	0.0365043	0.400435	0.393939	0.606061	0	-4.19417	-2.58673	NA	-1.60744		USP27X	X	49644469	49647169	0.0364299	0.173133	0.0606061	0.575758	0.363636	4.6244	4.13857	3.29174	-0.893101
SPDL1	5	169010637	169031782	+	0.0365494	0.400435	0.393939	0.606061	0	0.422784	-0.470046	NA	0.89283		NFIB	9	14081841	14180801	0.0364728	0.173133	0	0.818182	0.181818	NA	-1.16544	-2.99931	-1.83387
NSG1	4	4387982	4420785	+	0.0367047	0.400435	0.454545	0.545455	0	1.10242	-0.931356	NA	2.03378		RECK	9	36036909	36086281	0.0365994	0.173199	0	0.818182	0.181818	NA	-0.165085	-1.41714	-1.25206
ZNF343	20	2462462	2505168	-	0.0367808	0.400435	0.484848	0.515152	0	0.657107	0.108689	NA	0.548418		ANKRD12	18	9136750	9285983	0.0369441	0.173677	0	0.363636	0.636364	NA	-0.472665	-1.17202	-0.699352
SAMD10	20	62605465	62610995	-	0.0368423	0.400435	0.575758	0.424242	0	0.0830012	-0.484197	NA	0.567198		ERP44	9	102741460	102861334	0.0370369	0.173677	0	0.848485	0.151515	NA	-0.260159	-0.78827	-0.528111
PARP2	14	20811772	20826063	+	0.0369286	0.400435	0.363636	0.636364	0	0.779579	0.111289	NA	0.66829		BICD2	9	95473644	95527083	0.0371493	0.173677	0	0.818182	0.181818	NA	0.384256	-0.409355	-0.79361
TEX22	14	105864919	105880196	+	0.0371445	0.400435	0.242424	0.757576	0	1.74405	0.888627	NA	0.855425		DCAF12	9	34086380	34126771	0.0373375	0.173677	0	0.818182	0.181818	NA	0.696509	0.0797992	-0.61671
EPB41L4A	5	111478138	111755013	-	0.0372264	0.400435	0.393939	0.606061	0	-1.63001	-0.600245	NA	-1.02977		LMAN1	18	56995054	57026508	0.0374104	0.173677	0	0.363636	0.636364	NA	-0.597083	-1.3336	-0.736517
ARFIP1	4	153701088	153833064	+	0.0373416	0.400435	0.424242	0.575758	0	0.371962	-0.0955177	NA	0.46748		ARR3	X	69488184	69501690	0.0375099	0.173677	0	0.666667	0.333333	NA	-0.450363	-1.5662	-1.11584
SH3TC1	4	8200970	8242830	+	0.037415	0.400435	0.454545	0.545455	0	2.9799	2.1481	NA	0.831803		VSIG4	X	65241579	65259967	0.0375239	0.173677	0.0606061	0.636364	0.30303	-1.60682	-1.67072	-0.533982	1.13118
STAM	10	17686123	17758823	+	0.0374239	0.400435	0.212121	0.787879	0	0.751788	0.0377432	NA	0.714045		WAS	X	48542185	48549818	0.0376036	0.173677	0	0.636364	0.363636	NA	-1.27176	-0.455313	0.81645
TICAM2	5	114914192	114938176	-	0.0374322	0.400435	0.393939	0.606061	0	-2.13095	0.320281	NA	-2.45123		REPS2	X	16964813	17171403	0.0378659	0.174365	0	0.666667	0.333333	NA	1.49681	0.648245	-0.848563
CCL28	5	43376746	43412493	-	0.0376429	0.40097	0.454545	0.545455	0	-1.21796	-0.0389752	NA	-1.17899		TSC1	9	135766734	135820020	0.0380892	0.174869	0	0.848485	0.151515	NA	0.576967	-0.627002	-1.20397
USP42	7	6144549	6201195	+	0.0378781	0.40097	0.272727	0.727273	0	0.0505521	-0.291799	NA	0.342351		PHF19	9	123617928	123631189	0.0386498	0.176269	0	0.848485	0.151515	NA	-0.0161921	-0.857015	-0.840823
HPS1	10	100175954	100206720	-	0.03792	0.40097	0.212121	0.787879	0	-1.82353	-0.808275	NA	-1.01525		ZFX	X	24167105	24234206	0.0386689	0.176269	0	0.666667	0.333333	NA	-0.00598068	-0.973531	-0.96755
CALY	10	135138926	135150487	-	0.0382963	0.40097	0.242424	0.757576	0	5.86061	4.61934	NA	1.24127		C18orf56	18	649619	658340	0.038738	0.176269	0	0.363636	0.636364	NA	-0.12326	-1.32404	-1.20078
LRAT	4	155661992	155674271	+	0.0383285	0.40097	0.424242	0.575758	0	-3.38605	-1.38873	NA	-1.99732		SLITRK5	13	88324869	88331871	0.0403813	0.18303	0.0606061	0.757576	0.181818	-1.95707	-1.73055	0.159451	1.90678
OIT3	10	74653313	74692794	+	0.0385766	0.40097	0.242424	0.757576	0	-4.93177	-1.36234	NA	-3.56943		CARS2	13	111293756	111358527	0.0404619	0.18303	0.0606061	0.757576	0.181818	-0.195799	-0.232462	-0.562605	-0.332859
TSPAN5	4	99391517	99579812	-	0.0387281	0.40097	0.424242	0.575758	0	0.569127	-0.482267	NA	1.05139		AGTPBP1	9	88161453	88356944	0.0407036	0.183584	0	0.818182	0.181818	NA	0.0608475	-0.570714	-0.631561
GPR162	12	6930962	6936583	+	0.0388311	0.40097	0.151515	0.848485	0	1.52108	0.356143	NA	1.16493		TMX3	18	66340924	66382353	0.0408919	0.183894	0	0.363636	0.636364	NA	0.0802805	-0.957631	-1.03791
CDH10	5	24487208	24593608	-	0.0392911	0.40097	0.454545	0.545455	0	0.313955	2.06861	NA	-1.75466		GTF3C5	9	135906061	135933890	0.0412504	0.184941	0	0.848485	0.151515	NA	0.405089	-0.200039	-0.605128
MGAT1	5	180217540	180230048	-	0.0393069	0.40097	0.454545	0.545455	0	-0.666396	1.41585	NA	-2.08224		SDCCAG3	9	139296373	139305054	0.0414545	0.184941	0	0.848485	0.151515	NA	0.188844	-0.597047	-0.785891
CCDC96	4	7042575	7044728	-	0.0393268	0.40097	0.454545	0.545455	0	2.49178	1.78431	NA	0.707471		LPAR6	13	48985180	48987653	0.0415241	0.184941	0.030303	0.727273	0.242424	-1.52443	-0.124882	-1.59065	-1.40979
PLEKHA8	7	30067976	30157961	+	0.0393492	0.40097	0.272727	0.727273	0	0.237608	-0.78251	NA	1.02012		FGF9	13	22245214	22278640	0.0416057	0.184941	0.0909091	0.727273	0.181818	2.4382	1.6682	0.158076	-1.59568
OSGEP	14	20915206	20923267	-	0.0394001	0.40097	0.363636	0.636364	0	0.851513	0.11871	NA	0.732803		DCAF10	9	37800550	37867666	0.0419734	0.186038	0	0.848485	0.151515	NA	0.388077	-1.00342	-1.3915
SLK	10	105726942	105788991	+	0.0395142	0.40097	0.212121	0.787879	0	0.581297	-0.345546	NA	0.926843		LIG4	13	108859789	108867130	0.0424369	0.187552	0.030303	0.787879	0.181818	0.294099	-0.275624	-0.818871	-0.564348
VPS37A	8	17104400	17155533	+	0.0395559	0.40097	0.151515	0.848485	0	1.50814	0.0578258	NA	1.45031		SACS	13	23902961	24007867	0.0425649	0.187578	0.0909091	0.727273	0.181818	-2.15146	-0.966637	-0.255018	0.843266
SFTPD	10	81697495	81708861	-	0.0398781	0.40097	0.212121	0.787879	0	4.27017	3.19612	NA	1.07405		CEP78	9	80850977	80881991	0.0429031	0.188529	0	0.818182	0.181818	NA	0.543864	-0.190343	-0.734206
LAMTOR3	4	100799494	100815703	-	0.0398828	0.40097	0.424242	0.575758	0	0.663971	0.0163149	NA	0.647656		DNAJC15	13	43597361	43683306	0.0430908	0.188814	0.030303	0.757576	0.212121	-0.73408	-0.870755	-1.37859	-0.513096
RSPO4	20	939094	982907	-	0.0399673	0.40097	0.454545	0.545455	0	2.24303	0.147669	NA	2.09536		DNAJB5	9	34989637	34998430	0.0432236	0.188858	0	0.818182	0.181818	NA	0.176447	-1.68147	-1.85791
CRIPAK	4	1385339	1389782	+	0.0400125	0.40097	0.424242	0.575758	0	0.326797	-0.238083	NA	0.564879		COL4A2	13	110959613	111165556	0.0435027	0.189539	0.0606061	0.757576	0.181818	-1.49235	-0.600151	0.114276	0.780516
MSS51	10	75183336	75193319	-	0.0400728	0.40097	0.242424	0.757576	0	1.09771	0.0253298	NA	1.07238		C9orf9	9	135754284	135765588	0.0442496	0.192248	0	0.848485	0.151515	NA	1.37031	0.566878	-0.803434
DNAJC12	10	69556426	69597937	-	0.0401363	0.40097	0.181818	0.818182	0	4.67015	3.91613	NA	0.754027		NBEA	13	35516423	36246873	0.0445295	0.192919	0.030303	0.757576	0.212121	4.15636	1.7926	2.95528	1.07177
OR2A42	7	143929003	143929936	-	0.0401635	0.40097	0.272727	0.727273	0	-1.41827	-0.245857	NA	-1.17241		TSTD2	9	100362361	100395962	0.0447467	0.193118	0	0.848485	0.151515	NA	0.603543	-0.248667	-0.852209
GPRIN2	10	46993545	47000568	+	0.0402636	0.40097	0.181818	0.818182	0	-3.42836	-1.48611	NA	-1.94225		DGKH	13	42614171	42817033	0.0448265	0.193118	0.030303	0.757576	0.212121	-1.72555	-0.662914	2.32574	3.02953
NDUFAF2	5	60240955	60448864	+	0.0402956	0.40097	0.424242	0.575758	0	0.758026	-0.0146676	NA	0.772694		ROCK1	18	18529700	18691812	0.0453639	0.194887	0	0.545455	0.454545	NA	-0.124515	-0.756498	-0.631983
PTPN1	20	49126857	49201299	+	0.0405527	0.40097	0.606061	0.393939	0	0.726475	0.446599	NA	0.279876		FBP2	9	97320995	97356114	0.0460873	0.197052	0	0.818182	0.181818	NA	-0.538233	-1.66646	-1.12823
SEC23B	20	18488187	18542050	+	0.0406329	0.40097	0.545455	0.454545	0	1.50438	0.961328	NA	0.543049		ABL1	9	133589267	133763062	0.0461458	0.197052	0	0.848485	0.151515	NA	-0.277527	-1.23421	-0.956681
BTNL8	5	180326076	180377906	+	0.0407614	0.40097	0.454545	0.545455	0	-7.24954	-4.66433	NA	-2.58521		PAN3	13	28712642	28869475	0.046291	0.197052	0.030303	0.818182	0.151515	0.168638	-0.542111	-1.54077	-1.02404
SRCRB4D	7	76018645	76039012	-	0.0408127	0.40097	0.181818	0.818182	0	0.897961	0.103301	NA	0.79466		TEX30	13	103418237	103426171	0.0463804	0.197052	0.030303	0.787879	0.181818	-0.382554	0.384246	-0.238408	-0.594254
SMOC1	14	70346113	70499083	+	0.040834	0.40097	0.363636	0.636364	0	5.30123	3.83556	NA	1.46567		YIPF6	X	67718623	67757127	0.0466672	0.197725	0	0.666667	0.333333	NA	1.54094	-0.218816	-1.75975
LIMK1	7	73498106	73536855	+	0.0409057	0.40097	0.242424	0.757576	0	0.0235217	0.639481	NA	-0.61596		KATNAL1	13	30776766	30881191	0.04715	0.198728	0.030303	0.787879	0.181818	1.90018	0.158249	1.81869	1.59592
PAIP2	5	138677520	138705409	+	0.0409611	0.40097	0.424242	0.575758	0	0.0633283	1.21144	NA	-1.14812		MPP1	X	154006958	154033802	0.0471867	0.198728	0	0.666667	0.333333	NA	-0.190668	0.671659	0.862328
IK	5	140027383	140042065	+	0.0410852	0.401085	0.454545	0.545455	0	0.68718	0.407347	NA	0.279833		SEMA4D	9	91975705	92094611	0.0472915	0.198728	0	0.818182	0.181818	NA	0.577275	-0.115929	-0.693204
GPR150	5	94955979	94957284	+	0.0414205	0.40125	0.454545	0.545455	0	4.56978	3.2033	NA	1.36648		ENTPD8	9	140328815	140335901	0.0474426	0.198819	0	0.848485	0.151515	NA	-1.61333	-4.78275	-3.16941
TAPT1	4	16162127	16228161	-	0.0414209	0.40125	0.484848	0.515152	0	0.809304	0.500677	NA	0.308627		LDLRAD4	18	13218728	13652753	0.0485235	0.202288	0	0.363636	0.636364	NA	-0.256338	-1.84967	-1.59333
IRF2BPL	14	77490885	77495042	-	0.0414389	0.40125	0.363636	0.636364	0	1.62207	1.02506	NA	0.597013		APBA1	9	72042448	72287275	0.0485457	0.202288	0	0.818182	0.181818	NA	1.85502	1.0238	-0.831221
CD300A	17	72462511	72480937	+	0.0416461	0.402167	0.151515	0.848485	0	-0.441845	-1.17733	NA	0.735485		RGAG4	X	71346959	71351751	0.0486648	0.202288	0	0.666667	0.333333	NA	3.34034	2.24845	-1.09189
GBF1	10	104005254	104142656	+	0.0419784	0.403416	0.212121	0.787879	0	0.868025	0.560557	NA	0.307468		LATS2	13	21547174	21635722	0.0491251	0.203651	0.0909091	0.727273	0.181818	-1.90927	-1.18348	-0.453221	0.810905
MFSD10	4	2932287	2935964	-	0.0420014	0.403416	0.424242	0.575758	0	-0.122406	-0.716695	NA	0.594289		ABCB7	X	74273006	74376175	0.0494414	0.203923	0	0.666667	0.333333	NA	-0.144774	-0.464135	-0.31936
JAKMIP1	4	6027925	6202318	-	0.0422589	0.404217	0.454545	0.545455	0	3.31276	2.18831	NA	1.12445		RALGPS1	9	129677052	129940810	0.0494991	0.203923	0	0.848485	0.151515	NA	-0.00316701	-1.11724	-1.11407
DUS4L	7	107204401	107218968	+	0.0427583	0.404217	0.272727	0.727273	0	0.740742	0.129166	NA	0.611576		ERMP1	9	5784571	5833081	0.0495886	0.203923	0	0.818182	0.181818	NA	0.395129	-0.20524	-0.600369
C4orf48	4	2043719	2045697	+	0.0428287	0.404217	0.424242	0.575758	0	0.222319	-1.06988	NA	1.2922		KLHL15	X	24001832	24045303	0.0502133	0.205942	0	0.666667	0.333333	NA	0.298531	-0.166017	-0.464548
SIX4	14	61176255	61190852	-	0.0431674	0.404217	0.393939	0.606061	0	1.50589	-0.119621	NA	1.62551		FIGF	X	15363712	15402498	0.0504846	0.206503	0	0.636364	0.363636	NA	-3.43634	-4.82993	-1.39359
DCK	4	71859264	71896631	+	0.0432137	0.404217	0.393939	0.606061	0	1.24352	0.785168	NA	0.458351		DNM1	9	130965633	131017527	0.0506453	0.206611	0	0.848485	0.151515	NA	3.58079	2.52232	-1.05847
SHFM1	7	96135934	96339203	-	0.0432948	0.404217	0.242424	0.757576	0	1.95429	-0.178313	NA	2.1326		XK	X	37545008	37591383	0.0508238	0.206791	0	0.636364	0.363636	NA	-1.23344	-2.01997	-0.786531
LAMP5	20	9495004	9511171	+	0.0433196	0.404217	0.515152	0.484848	0	-0.447636	-1.79985	NA	1.35221		OSTF1	9	77703397	77762114	0.0512556	0.207998	0	0.818182	0.181818	NA	-0.764017	-1.25455	-0.490535
THOC3	5	175386533	175395318	-	0.0434508	0.404217	0.424242	0.575758	0	1.01009	0.332336	NA	0.677758		CABYR	18	21718919	21740033	0.051944	0.210236	0	0.363636	0.636364	NA	-0.55838	-1.77343	-1.21505
CRIP1	14	105953256	105955126	+	0.0435028	0.404217	0.181818	0.818182	0	-3.9717	-1.57072	NA	-2.40098		ARHGEF9	X	62854846	63005426	0.0537994	0.217175	0.121212	0.545455	0.333333	2.23225	1.66161	2.44151	0.676147
MCTP1	5	94041241	94417570	-	0.0437116	0.404217	0.454545	0.515152	0.030303	2.00182	1.27629	0.211557	0.784682		DENND4C	9	19230487	19374266	0.054204	0.217397	0	0.818182	0.181818	NA	-0.483857	-1.20967	-0.725814
VSTM2L	20	36531498	36573752	+	0.0437172	0.404217	0.515152	0.484848	0	6.08417	4.27285	NA	1.81133		C9orf72	9	27546543	27573491	0.054335	0.217397	0	0.818182	0.181818	NA	0.437451	-0.481958	-0.919409
MSMO1	4	166248817	166264316	+	0.0437486	0.404217	0.424242	0.575758	0	-0.262584	0.860052	NA	-1.12264		RPS6	9	19376253	19380235	0.0544753	0.217397	0	0.818182	0.181818	NA	-0.528149	-1.21138	-0.683234
PRTFDC1	10	25137535	25241573	-	0.0437543	0.404217	0.212121	0.787879	0	1.00045	0.084052	NA	0.916397		PSMB7	9	127115743	127177752	0.0545854	0.217397	0	0.848485	0.151515	NA	-0.198983	-1.64368	-1.44469
CHD6	20	40030740	40247133	-	0.043767	0.404217	0.515152	0.484848	0	1.35161	0.681695	NA	0.66991		RGCC	13	42031541	42045013	0.0547781	0.217397	0.030303	0.757576	0.212121	0.852954	0.621537	1.43447	0.804032
PSTK	10	124739555	124749906	+	0.0437817	0.404217	0.212121	0.787879	0	1.45271	0.749744	NA	0.702968		FBXO10	9	37510888	37576250	0.0548393	0.217397	0	0.848485	0.151515	NA	1.57248	0.393931	-1.17855
ZNF831	20	57766074	57834168	+	0.0443024	0.406533	0.575758	0.424242	0	1.89039	0.772146	NA	1.11824		GALNT1	18	33234532	33291798	0.0548441	0.217397	0	0.363636	0.636364	NA	-0.359514	-1.35175	-0.992232
SMNDC1	10	112052797	112064707	-	0.0443317	0.406533	0.212121	0.787879	0	0.556396	0.174732	NA	0.381663		MYL12B	18	3262110	3278282	0.0554647	0.219292	0	0.363636	0.636364	NA	-0.733319	-1.56423	-0.830908
PDAP1	7	98992295	99006305	-	0.0443739	0.406533	0.212121	0.787879	0	0.43078	0.104794	NA	0.325986		UBL4A	X	153712055	153715009	0.0557247	0.219755	0	0.666667	0.333333	NA	0.242587	0.535107	0.292521
MSRA	8	9911778	10286401	+	0.0446779	0.407753	0.181818	0.818182	0	-2.87844	-1.80954	NA	-1.0689		SOCS6	18	67956136	67997434	0.0558879	0.219835	0.030303	0.333333	0.636364	2.27116	-0.339637	-0.804651	-0.68258
DAAM1	14	59655380	59838123	+	0.0447815	0.407753	0.393939	0.606061	0	0.960692	0.233005	NA	0.727687		SMAD7	18	46446222	46469177	0.0564625	0.220103	0	0.363636	0.636364	NA	-0.169548	-0.992442	-0.822894
TSPAN15	10	71211225	71267423	+	0.0448494	0.407753	0.212121	0.787879	0	-2.63815	-1.03225	NA	-1.6059		C9orf106	9	132083294	132084882	0.0564639	0.220103	0	0.848485	0.151515	NA	2.27979	1.11944	-1.16034
SGCB	4	52886860	52904485	-	0.0451662	0.408248	0.363636	0.636364	0	0.632415	0.0461086	NA	0.586307		ZNF397	18	32820993	32827153	0.0565107	0.220103	0	0.363636	0.636364	NA	0.619161	-0.00498915	-0.624151
ATG2B	14	96745538	96829738	-	0.0452099	0.408248	0.393939	0.606061	0	0.937319	0.551591	NA	0.385728		TRPM6	9	77337410	77502263	0.0565283	0.220103	0	0.818182	0.181818	NA	-2.56352	-4.71289	-2.14937
PTPRT	20	40701391	41818557	-	0.0452467	0.408248	0.545455	0.454545	0	5.72283	4.13246	NA	1.59037		GPALPP1	13	45563664	45602405	0.0573197	0.22262	0.030303	0.787879	0.181818	1.82065	0.364486	-0.11092	-0.529338
AFF1	4	87856153	88062206	+	0.0454554	0.408624	0.454545	0.545455	0	-0.572216	0.37094	NA	-0.943156		UBAC2	13	99852678	100038753	0.0575882	0.2231	0.030303	0.787879	0.181818	-0.330242	-0.147001	-1.71	-1.55621
ANKRD17	4	73939682	74088831	-	0.0456122	0.408624	0.393939	0.606061	0	0.68861	0.349865	NA	0.338745		TOR2A	9	130493802	130497628	0.0579275	0.223851	0	0.848485	0.151515	NA	0.5845	-0.10728	-0.69178
UTP3	4	71554195	71556268	+	0.0457196	0.408624	0.393939	0.606061	0	0.612889	0.341159	NA	0.27173		ZDHHC15	X	74588261	74743337	0.0581397	0.224108	0	0.666667	0.333333	NA	1.68587	0.675657	-1.01021
KLHDC2	14	50234786	50249856	+	0.0457458	0.408624	0.393939	0.606061	0	0.0528796	0.569463	NA	-0.516583		FAM124A	13	51796469	51827750	0.058898	0.225909	0.0606061	0.69697	0.242424	-1.43117	-0.34732	1.23633	1.67036
PINX1	8	10622470	10697409	-	0.0460612	0.409958	0.181818	0.818182	0	0.456747	-0.649364	NA	1.10611		ZNF883	9	115759399	115774472	0.0589391	0.225909	0	0.848485	0.151515	NA	0.39122	-2.00208	-2.3933
C6	5	41142247	41213695	-	0.046192	0.409958	0.454545	0.545455	0	-0.782147	1.72648	NA	-2.50863		MBD2	18	51677970	51751158	0.0590477	0.225909	0	0.363636	0.636364	NA	-0.479478	-0.867748	-0.38827
CKMT2	5	80529138	80562217	+	0.0463184	0.409958	0.454545	0.545455	0	-2.07612	-0.763623	NA	-1.3125		REXO4	9	136271181	136283216	0.0593407	0.226467	0	0.848485	0.151515	NA	0.426496	-0.0719019	-0.498398
WDR36	5	110427869	110466200	+	0.046354	0.409958	0.424242	0.545455	0.030303	0.507231	0.0860048	0.561771	0.396186		N4BP2L2	13	33006624	33112932	0.0598233	0.226692	0.030303	0.787879	0.181818	0.831362	-0.36455	-0.993645	-0.673388
SCGB3A1	5	180017104	180018487	-	0.0466623	0.411556	0.454545	0.545455	0	-0.388391	0.666542	NA	-1.05493		ENDOG	9	131580778	131584955	0.0600542	0.226692	0	0.848485	0.151515	NA	0.246047	-0.824084	-1.07013
PEX1	7	92116336	92157845	-	0.0470281	0.411556	0.272727	0.727273	0	0.482175	0.0606847	NA	0.42149		BCOR	X	39910498	40036582	0.0602335	0.226692	0	0.636364	0.363636	NA	1.38079	0.743337	-0.637451
LPL	8	19796581	19824770	+	0.0473329	0.411556	0.151515	0.848485	0	1.71172	0.457559	NA	1.25416		ARMCX5	X	101854095	101859087	0.0602628	0.226692	0	0.727273	0.272727	NA	-0.61651	0.481746	1.09826
DDX50	10	70661033	70706603	+	0.047418	0.411556	0.212121	0.757576	0.030303	0.923898	0.403936	0.0198076	0.534737		LRRC8A	9	131644390	131680318	0.0602723	0.226692	0	0.848485	0.151515	NA	0.0963847	-0.662297	-0.758681
DBNDD2	20	44034632	44039250	+	0.0475368	0.411556	0.515152	0.484848	0	-0.403251	-1.52054	NA	1.11729		GPR107	9	132815984	132892303	0.0602842	0.226692	0	0.848485	0.151515	NA	0.670986	-0.307255	-0.978241
SYNJ2BP	14	70833212	70883807	-	0.0475823	0.411556	0.363636	0.636364	0	0.11771	-0.723677	NA	0.841387		C9orf89	9	95858449	95875565	0.0606063	0.227348	0	0.818182	0.181818	NA	-0.356206	-1.00908	-0.652872
FGFBP3	10	93666344	93669258	-	0.0476127	0.411556	0.212121	0.787879	0	2.9143	2.08741	NA	0.826889		APEX2	X	55026755	55034306	0.0609062	0.227917	0	0.666667	0.333333	NA	0.183847	1.14339	0.959544
EXOC1	4	56719815	56771244	+	0.0476967	0.411556	0.424242	0.575758	0	0.121292	-0.335077	NA	0.456369		AAED1	9	99403532	99417599	0.0611985	0.228455	0	0.848485	0.151515	NA	0.335761	-0.408961	-0.744722
UGT2B10	4	69681710	69697735	+	0.0476975	0.411556	0.363636	0.636364	0	1.78414	3.50575	NA	-1.72161		ARMCX4	X	100673250	100790975	0.0617078	0.229339	0	0.666667	0.333333	NA	0.803543	-0.073715	-0.877258
METTL17	14	21457964	21465194	+	0.0477658	0.411556	0.363636	0.636364	0	0.151818	-0.254686	NA	0.406505		FANCG	9	35073834	35080013	0.0617336	0.229339	0	0.818182	0.181818	NA	0.425983	-0.0660082	-0.491991
BMS1	10	43277953	43330385	+	0.047872	0.411556	0.242424	0.757576	0	0.656479	0.307092	NA	0.349387		DHRS12	13	52342128	52378298	0.0621679	0.23024	0.0606061	0.69697	0.242424	0.828284	0.285715	-0.0188693	-0.347989
SRP72	4	57333761	57369847	+	0.0479169	0.411556	0.424242	0.575758	0	0.603263	0.325247	NA	0.278016		POLR1E	9	37485931	37503694	0.062372	0.23024	0	0.848485	0.151515	NA	0.20526	-0.502173	-0.707433
NSUN6	10	18834135	18940566	-	0.0482534	0.413346	0.212121	0.787879	0	1.18827	0.508004	NA	0.680269		SERP2	13	44947785	44971850	0.0624253	0.23024	0.030303	0.787879	0.181818	2.54318	1.28685	0.201929	-1.13145
DNAAF2	14	50091891	50101948	-	0.048446	0.413346	0.393939	0.606061	0	0.50544	0.908275	NA	-0.402835		RBM18	9	125001833	125027143	0.0637772	0.234663	0	0.848485	0.151515	NA	0.39229	-0.30616	-0.698451
CENPB	20	3764497	3767337	-	0.0484725	0.413346	0.515152	0.484848	0	0.79683	0.536713	NA	0.260117		ZC3H13	13	46528599	46626913	0.0640511	0.235109	0.030303	0.787879	0.181818	0.672167	0.0832589	-0.241027	-0.346097
CHUK	10	101948054	101989367	-	0.0486667	0.414015	0.212121	0.787879	0	0.98282	-0.274425	NA	1.25725		ANKRD29	18	21178889	21242849	0.0642084	0.235125	0	0.363636	0.636364	NA	-1.48169	-2.70214	-1.22045
MBLAC2	5	89754019	89770585	-	0.0488528	0.414025	0.454545	0.545455	0	0.470562	0.0256054	NA	0.444956		KDM4C	9	6720862	7077264	0.0646708	0.235414	0	0.787879	0.212121	NA	0.249354	-0.147587	-0.396942
PAK7	20	9518035	9819689	-	0.0491324	0.414025	0.515152	0.484848	0	4.9323	3.47109	NA	1.46121		TMTC4	13	101256089	101327189	0.0647267	0.235414	0.030303	0.787879	0.181818	-0.760624	-0.481843	-1.54415	-1.05198
FAM193B	5	176946789	176981586	-	0.0492776	0.414025	0.424242	0.575758	0	0.354142	-0.0614236	NA	0.415565		CTNNAL1	9	111704848	111775874	0.0647664	0.235414	0	0.848485	0.151515	NA	-0.44926	-1.71542	-1.26616
PLD4	14	105391152	105399573	+	0.0494029	0.414025	0.393939	0.606061	0	-1.94668	-0.957586	NA	-0.989092		ARHGEF7	13	111766965	111947542	0.0649034	0.235414	0.0606061	0.757576	0.181818	1.07352	-0.660462	-1.17217	-0.640156
MLF2	12	6857157	6862082	-	0.049593	0.414025	0.151515	0.848485	0	0.576387	0.105252	NA	0.471135		KLF12	13	74260148	74708066	0.0650526	0.235414	0.030303	0.787879	0.181818	0.544869	0.061131	0.667608	0.588561
ANKRD26	10	27293044	27389427	-	0.0495984	0.414025	0.212121	0.787879	0	0.958987	-0.210938	NA	1.16992		TCEAL7	X	102585113	102587251	0.0655857	0.235696	0	0.666667	0.333333	NA	-0.502784	-2.04363	-1.54084
NELFCD	20	57556262	57570188	+	0.0496944	0.414025	0.606061	0.393939	0	0.788368	0.196538	NA	0.591829		ERCC6L2	9	98637899	98731122	0.0656219	0.235696	0	0.848485	0.151515	NA	0.135931	-0.622953	-0.758884
TBC1D1	4	37892704	38140796	+	0.0497067	0.414025	0.484848	0.515152	0	1.41882	0.743918	NA	0.674902		TRAPPC2	X	13730360	13752754	0.0656498	0.235696	0	0.636364	0.363636	NA	0.458494	-0.702322	-1.16082
DTD1	20	18568536	18612822	+	0.0497108	0.414025	0.545455	0.454545	0	1.88366	1.45985	NA	0.423802		TMEM38B	9	108456805	108538892	0.0658652	0.235696	0	0.848485	0.151515	NA	0.629001	0.0812414	-0.54776
FAM196A	10	128933689	128994422	-	0.0499082	0.414703	0.212121	0.787879	0	4.7054	2.96459	NA	1.74081		KCTD1	18	24034873	24128500	0.0658967	0.235696	0	0.363636	0.636364	NA	0.82968	0.202238	-0.627442
CAMK2G	10	75572258	75634349	-	0.0500993	0.415325	0.212121	0.787879	0	0.382035	-1.14128	NA	1.52332		IDNK	9	86237963	86259045	0.0660938	0.235852	0	0.818182	0.181818	NA	-0.437852	-1.68741	-1.24956
HERPUD2	7	35672268	35734772	-	0.0503155	0.416151	0.242424	0.757576	0	0.484323	0.205604	NA	0.278719		PIGN	18	59711456	59854289	0.0665546	0.236947	0	0.363636	0.636364	NA	-0.0391753	-0.539692	-0.500517
PSD	10	104162373	104169041	-	0.0506598	0.418031	0.212121	0.787879	0	2.95946	1.07292	NA	1.88653		ZMYND19	9	140476530	140484937	0.0669207	0.2377	0	0.848485	0.151515	NA	0.746889	0.196576	-0.550313
PPP2CA	5	133532147	133561950	-	0.0509893	0.41978	0.424242	0.575758	0	0.410062	0.121094	NA	0.288967		MAPKAP1	9	128199672	128469513	0.0670932	0.237764	0	0.848485	0.151515	NA	-0.915508	-1.65751	-0.742006
IDUA	4	980784	998345	+	0.0514924	0.422948	0.424242	0.575758	0	0.813501	0.318961	NA	0.49454		TSPAN7	X	38420730	38548172	0.0677892	0.239678	0	0.636364	0.363636	NA	2.63539	0.151301	-2.48409
DCLRE1A	10	115594482	115613975	-	0.0517279	0.423333	0.212121	0.787879	0	1.42992	0.809708	NA	0.62021		BNC2	9	16409500	16870786	0.0683826	0.241221	0	0.818182	0.181818	NA	-2.56749	-5.11212	-2.54462
ZNF713	7	55954969	56009918	+	0.0517763	0.423333	0.272727	0.727273	0	1.86432	1.08139	NA	0.78293		RLN2	9	5299863	5304228	0.0690676	0.24308	0	0.818182	0.181818	NA	1.58098	-0.0172873	-1.59827
RPGRIP1	14	21756135	21819460	+	0.0519752	0.423989	0.363636	0.636364	0	0.354977	-0.465892	NA	0.820869		SS18	18	23596216	23670611	0.0694814	0.243978	0	0.363636	0.636364	NA	0.0375037	-0.457899	-0.495403
LGALS3	14	55595934	55612148	+	0.0526099	0.426914	0.393939	0.606061	0	-5.16248	-3.22587	NA	-1.93662		ROR2	9	94484877	94712444	0.0707866	0.247137	0	0.818182	0.181818	NA	-1.83941	-3.12228	-1.28287
CPSF4	7	99036562	99055000	+	0.0527128	0.426914	0.212121	0.787879	0	0.711199	-0.276406	NA	0.987605		MAMLD1	X	149531544	149682448	0.0708284	0.247137	0	0.666667	0.333333	NA	2.39162	1.49641	-0.895215
WDR11	10	122610686	122669038	+	0.0527784	0.426914	0.212121	0.787879	0	0.336249	-0.110208	NA	0.446457		ALDH1B1	9	38392660	38398662	0.0708631	0.247137	0	0.848485	0.151515	NA	-1.08764	-2.55077	-1.46313
ZFHX4	8	77593514	77779521	+	0.0528117	0.426914	0.151515	0.848485	0	-2.48973	-1.19277	NA	-1.29696		HSD17B3	9	98997588	99064434	0.0715208	0.248271	0	0.848485	0.151515	NA	0.33868	-1.25577	-1.59446
DNTTIP1	20	44420575	44440066	+	0.0529782	0.427294	0.515152	0.484848	0	1.33997	0.288953	NA	1.05102		CLDN2	X	106143393	106174091	0.0716428	0.248271	0	0.666667	0.333333	NA	-0.197442	-3.74031	-3.54287
WDR91	7	134868589	134896316	-	0.0531143	0.427427	0.272727	0.727273	0	3.77691	1.95752	NA	1.8194		AK3	9	4709555	4726227	0.0716726	0.248271	0	0.818182	0.181818	NA	-1.06306	-1.79431	-0.731245
PSMA3	14	58711522	58738727	+	0.0534386	0.428032	0.393939	0.606061	0	0.347114	-0.206125	NA	0.553239		ENOSF1	18	670319	712664	0.0722021	0.249001	0	0.363636	0.636364	NA	-0.305216	-1.13153	-0.826309
HARS	5	140053488	140071312	-	0.0534786	0.428032	0.454545	0.545455	0	0.744874	0.434884	NA	0.30999		EDA2R	X	65815478	65835872	0.0723095	0.249001	0.030303	0.606061	0.363636	2.13074	1.8469	0.825792	-1.03462
TIMM9	14	58875211	58893960	-	0.0536888	0.428032	0.393939	0.606061	0	0.938621	-0.409803	NA	1.34842		IDS	X	148558520	148586884	0.072369	0.249001	0	0.666667	0.333333	NA	1.6651	1.25153	-0.413574
ZKSCAN5	7	99102266	99131445	+	0.053734	0.428032	0.212121	0.787879	0	0.76303	0.425424	NA	0.337607		PPP6C	9	127908851	127952218	0.0728149	0.249976	0	0.848485	0.151515	NA	0.365882	-0.21374	-0.579622
PFKFB3	10	6186840	6277508	+	0.0538751	0.428032	0.242424	0.757576	0	-2.19123	-0.876298	NA	-1.31494		PABPC3	13	25670275	25672705	0.0738753	0.253052	0.0606061	0.757576	0.181818	-0.754918	-0.750558	-1.4283	-0.677417
SYCP2	20	58438611	58508718	-	0.0539129	0.428032	0.575758	0.424242	0	1.13284	-0.22553	NA	1.35837		NDC80	18	2571509	2616634	0.07463	0.255069	0	0.363636	0.636364	NA	-0.782086	-1.94937	-1.16728
SUPT16H	14	21819630	21852425	-	0.0541212	0.428032	0.363636	0.636364	0	0.348929	-0.312471	NA	0.6614		TXLNG	X	16804554	16862642	0.0751163	0.255938	0	0.666667	0.333333	NA	0.55802	0.170326	-0.387694
GIMAP5	7	150434435	150440737	+	0.0541479	0.428032	0.272727	0.727273	0	-1.77904	-0.761967	NA	-1.01708		ZBTB6	9	125670334	125675607	0.0752171	0.255938	0	0.848485	0.151515	NA	0.309412	-0.392132	-0.701544
CBY3	5	179105558	179107975	-	0.0545241	0.430054	0.454545	0.545455	0	2.66761	1.75088	NA	0.916735		EXPH5	11	108376157	108408934	0.0756499	0.256842	0	0.848485	0.151515	NA	-0.66047	-2.27526	-1.61479
SRXN1	20	627258	634014	-	0.055114	0.43253	0.454545	0.545455	0	3.27214	-1.10073	NA	4.37287		GTF2F2	13	45694630	45858240	0.0758797	0.257055	0.030303	0.787879	0.181818	0.00924011	-0.435176	-0.837026	-0.41831
CPEB4	5	173315330	173387994	+	0.0551142	0.43253	0.424242	0.575758	0	1.8854	1.07542	NA	0.809978		GCNT1	9	79056581	79122332	0.0766643	0.258687	0	0.818182	0.181818	NA	-0.266276	-1.5105	-1.24422
UBE2V1	20	48697660	48729735	-	0.0552011	0.43253	0.575758	0.424242	0	0.800243	-0.426875	NA	1.22712		NEDD4L	18	55711609	56068772	0.0766978	0.258687	0	0.363636	0.636364	NA	0.589546	-0.135155	-0.724701
C7orf49	7	134777060	134855578	-	0.05536	0.432682	0.272727	0.727273	0	1.43122	0.548487	NA	0.88273		ATM	11	108093558	108239826	0.0768945	0.258783	0	0.848485	0.151515	NA	0.0990595	-0.400755	-0.499815
DMXL1	5	118406781	118584824	+	0.0554628	0.432682	0.424242	0.575758	0	0.303848	-0.11417	NA	0.418018		NPDC1	9	139933908	139940676	0.0770981	0.258894	0	0.848485	0.151515	NA	1.87194	1.00268	-0.869267
PPAT	4	57259527	57301802	-	0.0558535	0.434781	0.424242	0.575758	0	0.957679	0.423567	NA	0.534113		GRIA3	X	122318095	122624766	0.0773182	0.258894	0	0.666667	0.333333	NA	4.24167	3.3456	-0.896062
FAM133B	7	92190071	92219384	-	0.0565426	0.439188	0.272727	0.727273	0	0.375076	-0.11219	NA	0.487267		CCDC171	9	15553004	15974037	0.0774325	0.258894	0	0.818182	0.181818	NA	0.174687	-1.02234	-1.19703
OR13A1	10	45798101	45811056	-	0.0567063	0.439329	0.181818	0.818182	0	4.28991	2.78502	NA	1.50489		SMAD2	18	45359465	45456970	0.0780421	0.260158	0	0.363636	0.636364	NA	0.107297	-0.365686	-0.472983
SGMS2	4	108745720	108836203	+	0.0568066	0.439329	0.393939	0.606061	0	-2.40913	-1.38436	NA	-1.02477		RPL35	9	127620157	127624240	0.0781659	0.260158	0	0.848485	0.151515	NA	-0.348409	-1.10485	-0.756441
C4orf27	4	170650615	170679104	-	0.0570892	0.440109	0.424242	0.575758	0	-1.34988	-0.714274	NA	-0.635602		COL15A1	9	101705994	101833074	0.0783182	0.260158	0	0.848485	0.151515	NA	-1.15302	-2.92559	-1.77257
MKX	10	27961802	28034778	-	0.0571538	0.440109	0.212121	0.787879	0	0.24406	-0.938767	NA	1.18283		ELAC1	18	48494386	48514490	0.0797217	0.263341	0	0.363636	0.636364	NA	0.643163	0.1169	-0.526263
SPATA25	20	44515129	44516238	-	0.0574033	0.44058	0.515152	0.484848	0	1.10041	0.525368	NA	0.575041		UPF3B	X	118967988	118986991	0.0797285	0.263341	0	0.666667	0.333333	NA	0.10402	-0.693106	-0.797126
MCMBP	10	121588915	121632395	-	0.0574616	0.44058	0.212121	0.787879	0	0.267804	-0.0652484	NA	0.333053		NIPSNAP3B	9	107526021	107540045	0.0797898	0.263341	0	0.848485	0.151515	NA	1.47681	0.206929	-1.26988
HEATR2	7	766337	826116	+	0.0577206	0.441618	0.272727	0.727273	0	1.12383	0.395837	NA	0.72799		C9orf96	9	136243283	136271220	0.0803511	0.264124	0	0.848485	0.151515	NA	0.00701061	-1.17894	-1.18595
PTCD2	5	71616193	71655180	+	0.0579791	0.441704	0.454545	0.545455	0	0.884308	0.459318	NA	0.424991		RGS3	9	116207008	116360023	0.0803708	0.264124	0	0.848485	0.151515	NA	-0.634335	-1.58363	-0.949293
TET2	4	106067841	106200960	+	0.0579791	0.441704	0.424242	0.575758	0	-0.118215	-0.62868	NA	0.510465		TBC1D13	9	131549485	131572711	0.0817752	0.267781	0	0.848485	0.151515	NA	-0.0732096	-0.722786	-0.649577
NDUFA2	5	140024947	140027370	-	0.0586432	0.445799	0.454545	0.545455	0	0.145973	-0.528322	NA	0.674295		ACER2	9	19408924	19452500	0.0818317	0.267781	0	0.818182	0.181818	NA	0.623522	-0.364281	-0.987803
CALM1	14	90863326	90874619	+	0.0588175	0.445799	0.363636	0.636364	0	-1.04011	0.813551	NA	-1.85366		CXorf57	X	105855159	105922673	0.0824148	0.269117	0	0.666667	0.333333	NA	3.85007	3.17515	-0.674921
NEBL	10	21068901	21186531	-	0.0588909	0.445799	0.212121	0.787879	0	4.37907	3.55086	NA	0.82821		GPM6B	X	13789040	13956943	0.0829652	0.27034	0	0.636364	0.363636	NA	-3.05769	-4.75226	-1.69457
TTYH3	7	2671602	2704436	+	0.0590973	0.446416	0.272727	0.727273	0	1.22725	-0.614733	NA	1.84199		RAB12	18	8609442	8639380	0.0837751	0.272163	0	0.363636	0.636364	NA	0.22897	-0.215635	-0.444606
CDHR3	7	105603656	105676877	+	0.0597841	0.450651	0.272727	0.727273	0	4.45911	2.91509	NA	1.54402		SCML1	X	17755568	17773108	0.0838785	0.272163	0	0.636364	0.363636	NA	-0.408679	0.306954	0.715633
CPEB3	10	93808396	94003036	-	0.0599897	0.451249	0.212121	0.787879	0	1.21709	0.666379	NA	0.550715		TAF9B	X	77385244	77395179	0.0847988	0.274569	0	0.666667	0.333333	NA	1.43929	0.386793	-1.0525
TRIM73	7	75024902	75034896	+	0.060279	0.451429	0.181818	0.818182	0	1.71884	0.237554	NA	1.48128		SMU1	9	33041849	33076714	0.085567	0.276475	0	0.818182	0.181818	NA	0.135253	-0.409883	-0.545136
KLHDC1	14	50159822	50219870	+	0.0603138	0.451429	0.393939	0.606061	0	0.962469	0.3023	NA	0.660169		FNDC3A	13	49550047	49783915	0.0861712	0.277806	0.0606061	0.69697	0.242424	1.14411	0.217163	-0.630096	-0.921415
ADCK1	14	78266425	78400297	+	0.0603927	0.451429	0.363636	0.636364	0	0.756137	0.329519	NA	0.426618		SLITRK4	X	142710594	142722319	0.0863403	0.277806	0	0.666667	0.333333	NA	-0.807485	-2.17389	-1.3664
CLEC4E	12	8685900	8693558	-	0.0607058	0.452822	0.151515	0.848485	0	-1.22043	0.059606	NA	-1.28003		MBNL2	13	97874542	98046374	0.0868254	0.278784	0.030303	0.787879	0.181818	1.49999	1.35664	0.77543	-0.586515
SIMC1	5	175665361	175772994	+	0.0613328	0.454482	0.424242	0.575758	0	0.349156	0.0306475	NA	0.318508		BHLHB9	X	101975641	102007369	0.0872473	0.279555	0	0.727273	0.272727	NA	1.13199	-0.327735	-1.45972
DNAJB6	7	157129709	157179018	+	0.0615963	0.454482	0.30303	0.69697	0	0.832075	0.0499928	NA	0.782082		KIF12	9	116853917	116861337	0.087794	0.280722	0	0.848485	0.151515	NA	2.87819	1.37425	-1.50393
TTI1	20	36611408	36661870	-	0.0616369	0.454482	0.515152	0.484848	0	1.24029	0.727088	NA	0.513207		CNTRL	9	123850573	123939886	0.0879786	0.280728	0	0.848485	0.151515	NA	0.204871	-0.464826	-0.669697
CHMP4B	20	32399109	32442173	+	0.0616646	0.454482	0.515152	0.454545	0.030303	-0.435397	-0.092778	-0.284133	-0.330659		SETX	9	135136826	135230372	0.0887094	0.28212	0	0.848485	0.151515	NA	0.109748	-0.697347	-0.807094
DLD	7	107531551	107561643	+	0.0616917	0.454482	0.272727	0.727273	0	-0.470188	-0.825717	NA	0.355529		EXOSC2	9	133569146	133580281	0.0887814	0.28212	0	0.848485	0.151515	NA	0.253353	-0.289935	-0.543288
SS18L1	20	60718775	60757566	+	0.0617564	0.454482	0.575758	0.424242	0	1.12576	0.727362	NA	0.398394		IKBKG	X	153770454	153793261	0.0897184	0.284509	0	0.666667	0.333333	NA	0.141139	0.470372	0.329234
IFFO1	12	6648693	6665249	-	0.0618387	0.454482	0.151515	0.848485	0	-0.83871	0.161041	NA	-0.999751		TTLL11	9	124584203	124855885	0.0899637	0.2847	0	0.848485	0.151515	NA	-0.136073	-1.12939	-0.99332
YTHDC2	5	112849358	112930984	+	0.061946	0.454482	0.454545	0.545455	0	0.14275	-0.402606	NA	0.545356		FOXO1	13	41129800	41240734	0.0907534	0.286609	0.030303	0.757576	0.212121	0.233374	-0.259396	-0.6484	-0.407957
DPCD	10	103348044	103357769	+	0.0628995	0.458987	0.212121	0.787879	0	1.63017	0.732596	NA	0.897569		PRAF2	X	48928812	48931704	0.0914318	0.28781	0	0.636364	0.363636	NA	1.95966	1.05079	-0.908868
ADD1	4	2845583	2931803	+	0.0629736	0.458987	0.424242	0.575758	0	1.00532	-0.0684964	NA	1.07382		NARS	18	55267890	55289177	0.0915078	0.28781	0	0.363636	0.636364	NA	-0.230605	-0.576606	-0.346001
MAPK10	4	86933448	87275797	-	0.063046	0.458987	0.424242	0.575758	0	2.80553	1.86113	NA	0.944403		TNFSF11	13	43136871	43182149	0.0923211	0.289212	0.030303	0.757576	0.212121	0.647348	0.589897	-0.87848	-1.47059
DBF4	7	87505543	87538856	+	0.0630737	0.458987	0.242424	0.757576	0	-0.0476009	-0.787665	NA	0.740064		ARL11	13	50202434	50208008	0.0923296	0.289212	0.0606061	0.69697	0.242424	-1.14416	-2.08195	-3.27008	-1.26316
TNS3	7	47314751	47621742	-	0.0632754	0.459518	0.242424	0.757576	0	0.846761	-0.143977	NA	0.990738		PORCN	X	48367346	48379202	0.0930394	0.290843	0	0.636364	0.363636	NA	0.923976	0.0831906	-0.840786
NGDN	14	23938897	23947402	+	0.0638349	0.462641	0.363636	0.636364	0	0.774267	0.0178524	NA	0.756415		USP9X	X	40944887	41095832	0.093309	0.291014	0	0.636364	0.363636	NA	-0.170608	-0.425442	-0.254834
CLSTN3	12	7282966	7311541	+	0.0640981	0.463172	0.151515	0.848485	0	2.87999	2.46051	NA	0.419486		CHST7	X	46433121	46457931	0.093608	0.291014	0	0.636364	0.363636	NA	0.75934	0.279829	-0.47951
F2RL1	5	76114801	76131140	+	0.0642037	0.463172	0.454545	0.545455	0	-1.94256	-0.400167	NA	-1.5424		GAS6	13	114523521	114567076	0.0938126	0.291014	0.0909091	0.727273	0.181818	-0.388147	-0.51443	-1.20641	-0.706006
TTC5	14	20757289	20774153	-	0.0643295	0.463172	0.363636	0.636364	0	1.43187	0.754675	NA	0.677198		TRAPPC8	18	29409135	29523091	0.0938511	0.291014	0	0.363636	0.636364	NA	-0.0993566	-0.78531	-0.685954
PNN	14	39644386	39652422	+	0.0645829	0.463172	0.393939	0.606061	0	1.58506	0.0600863	NA	1.52497		WDR31	9	116075501	116102620	0.0941799	0.291446	0	0.848485	0.151515	NA	1.93767	0.902729	-1.03494
FLRT3	20	14304638	14318313	-	0.064769	0.463172	0.545455	0.454545	0	0.612893	-0.180568	NA	0.793461		AK1	9	130628758	130635827	0.0950972	0.293694	0	0.848485	0.151515	NA	1.53119	0.785082	-0.746105
IKZF5	10	124750321	124768203	-	0.0647897	0.463172	0.212121	0.787879	0	0.82936	0.373848	NA	0.455512		RDX	11	110045604	110167437	0.0968871	0.298153	0	0.848485	0.151515	NA	0.683516	1.968	1.28448
CSPP1	8	67976602	68108849	+	0.0648155	0.463172	0.151515	0.848485	0	0.320584	-0.297658	NA	0.618242		EIF2S3	X	24073064	24096927	0.0969289	0.298153	0	0.666667	0.333333	NA	-0.373767	-0.577169	-0.203402
TRMT44	4	8442531	8478282	+	0.0654016	0.465498	0.454545	0.545455	0	0.388788	0.0774909	NA	0.311297		ZXDA	X	57931863	57937067	0.0974049	0.29902	0	0.666667	0.333333	NA	0.819253	0.374987	-0.444267
LARS	5	145492588	145562350	-	0.0656017	0.465994	0.393939	0.606061	0	0.414651	0.0909785	NA	0.323673		FAM122C	X	133930442	133957020	0.0981092	0.300582	0	0.666667	0.333333	NA	-0.309641	-0.731757	-0.422116
TPK1	7	144149033	144533146	-	0.0661495	0.468953	0.272727	0.727273	0	0.155023	-0.94379	NA	1.09881		ACRC	X	70798260	70833433	0.0985994	0.301483	0	0.666667	0.333333	NA	-0.568156	-1.39341	-0.82525
PCDHGA4	5	140734591	140892546	+	0.0666555	0.469324	0.454545	0.545455	0	0.16284	1.24229	NA	-1.07945		ZMYM5	13	20397623	20437776	0.099352	0.302687	0.0606061	0.757576	0.181818	0.783867	0.0380878	-0.354268	-0.447599
KCNMA1	10	78629358	79110519	-	0.0667539	0.469324	0.212121	0.787879	0	1.17804	0.161765	NA	1.01628		RBM26	13	79893002	79980356	0.0994359	0.302687	0.030303	0.787879	0.181818	1.34668	0.40085	0.0185428	-0.417338
LONRF1	8	12579402	12612951	-	0.0668529	0.469324	0.181818	0.818182	0	0.562645	-0.299251	NA	0.861895		HIATL1	9	97136832	97223324	0.0995835	0.302687	0	0.818182	0.181818	NA	-0.121473	-0.707356	-0.585884
GPRC5C	17	72427666	72443568	+	0.0668898	0.469324	0.151515	0.848485	0	0.771934	0.0273343	NA	0.7446		TSC22D3	X	106956450	106959711	0.0998711	0.302962	0	0.666667	0.333333	NA	-0.914683	-0.348222	0.566461
NRP1	10	33466418	33623833	-	0.0669776	0.469324	0.212121	0.787879	0	1.50424	0.556349	NA	0.94789		CNTLN	9	17134988	17302049	0.101699	0.307899	0	0.818182	0.181818	NA	-0.297725	-1.0946	-0.796874
PBLD	10	70042416	70092684	-	0.0669921	0.469324	0.181818	0.818182	0	-3.56865	-0.256591	NA	-3.31206		LAMA3	18	21269406	21376117	0.102165	0.308702	0	0.363636	0.636364	NA	-2.77005	-3.84934	-1.07928
PSPH	7	56078743	56119268	-	0.0671213	0.469324	0.272727	0.727273	0	1.2872	0.909552	NA	0.37765		UCHL3	13	76123615	76180156	0.103326	0.311597	0.030303	0.787879	0.181818	-0.582364	-0.263813	-1.36922	-1.09361
RALGAPA1	14	36007557	36278529	-	0.0677626	0.472395	0.424242	0.575758	0	1.14266	0.747085	NA	0.395575		NOXA1	9	140317846	140328858	0.103831	0.312508	0	0.848485	0.151515	NA	0.0451888	-0.95511	-1.0003
EZH2	7	148504463	148580601	-	0.067825	0.472395	0.272727	0.727273	0	-0.296241	-1.48008	NA	1.18384		CORO2A	9	100883256	100935174	0.104072	0.312622	0	0.848485	0.151515	NA	-2.62504	-4.33032	-1.70529
TCF7L2	10	114710008	114927437	+	0.0680668	0.473157	0.212121	0.787879	0	-1.65935	-0.645953	NA	-1.0134		MIB1	18	19321289	19450918	0.104501	0.313022	0	0.393939	0.606061	NA	0.224954	-0.472207	-0.697161
ERGIC1	5	172261222	172379688	+	0.0691966	0.478177	0.484848	0.515152	0	-0.631846	1.16588	NA	-1.79772		MRRF	9	125026881	125087594	0.104612	0.313022	0	0.848485	0.151515	NA	-0.752999	-1.35188	-0.598876
GALNT10	5	153570294	153800544	+	0.0693582	0.478177	0.393939	0.606061	0	-0.527514	0.978331	NA	-1.50585		RPL21	13	27825691	27830705	0.105896	0.315541	0.0606061	0.757576	0.181818	1.68598	0.134445	-1.04947	-1.29884
SEC23IP	10	121652084	121704170	+	0.0693885	0.478177	0.212121	0.787879	0	0.44418	0.100975	NA	0.343205		KIF24	9	34252377	34329198	0.106036	0.315541	0	0.818182	0.181818	NA	-1.00404	-1.92848	-0.924443
GCK	7	44183869	44198887	-	0.069539	0.478177	0.242424	0.757576	0	1.97541	3.52612	NA	-1.55071		C18orf54	18	51884286	51908405	0.106069	0.315541	0	0.363636	0.636364	NA	-0.125717	-1.05738	-0.931666
NAA15	4	140222675	140311935	+	0.069568	0.478177	0.424242	0.575758	0	0.517452	0.0381531	NA	0.479299		LPIN2	18	2916991	3011945	0.106594	0.316489	0	0.363636	0.636364	NA	-0.662681	-1.13375	-0.471068
RELN	7	103112230	103629963	-	0.0695919	0.478177	0.272727	0.727273	0	0.586509	-1.01306	NA	1.59957		PHEX	X	22050561	22269427	0.106909	0.316814	0	0.636364	0.363636	NA	-2.12732	-1.2666	0.860721
AGAP4	10	46321039	46342921	-	0.0701172	0.480861	0.181818	0.818182	0	0.0940886	-0.730102	NA	0.824191		EXOSC3	9	37779710	37785089	0.107289	0.316919	0	0.848485	0.151515	NA	0.313741	-0.0333564	-0.347097
ACTL10	20	32254303	32256331	+	0.0702573	0.480899	0.484848	0.484848	0.030303	0.0732419	0.736487	2.65381	-0.776029		MYOM1	18	3066804	3220106	0.107393	0.316919	0	0.363636	0.636364	NA	-0.775184	-2.23221	-1.45703
PPAP2A	5	54720669	54830906	-	0.0707096	0.481729	0.454545	0.545455	0	-0.00496572	-0.433165	NA	0.428199		ZBTB26	9	125680307	125693544	0.107563	0.316919	0	0.848485	0.151515	NA	0.66013	-0.249981	-0.910111
MORN4	10	99374309	99393344	-	0.0707154	0.481729	0.212121	0.787879	0	3.01519	1.60712	NA	1.40807		FOCAD	9	20658307	20995954	0.108485	0.319025	0	0.818182	0.181818	NA	1.48222	0.743633	-0.738589
BLOC1S4	4	6717841	6719387	+	0.070783	0.481729	0.454545	0.545455	0	0.0707094	-0.238469	NA	0.309178		PTPDC1	9	96793075	96872138	0.109292	0.320784	0	0.818182	0.181818	NA	0.327499	-0.347994	-0.675493
PTGDR	14	52734430	52743442	+	0.071053	0.482647	0.393939	0.606061	0	-2.41128	-1.25513	NA	-1.15616		TCEAL5	X	102528617	102531797	0.10971	0.321397	0	0.666667	0.333333	NA	3.74897	2.83	-0.918972
FAM173B	5	10225618	10250021	-	0.0711916	0.482671	0.484848	0.515152	0	0.0727215	-0.227512	NA	0.300234		FKBP15	9	115927799	115983641	0.110047	0.321672	0	0.848485	0.151515	NA	-0.185733	-0.88256	-0.696826
MYL5	4	671710	675817	+	0.0714434	0.483461	0.424242	0.575758	0	-0.687118	-1.17367	NA	0.486554		TMEFF1	9	103235519	103339918	0.110222	0.321672	0	0.848485	0.151515	NA	-0.377748	-2.14465	-1.7669
DCTN4	5	150088308	150138082	-	0.0721567	0.484972	0.393939	0.606061	0	0.991898	-0.82439	NA	1.81629		DLEU7	13	51285161	51418075	0.11093	0.323124	0.0606061	0.69697	0.242424	-0.154226	-0.214998	-1.25875	-1.04861
ABHD16B	20	62492565	62494341	+	0.0721942	0.484972	0.575758	0.424242	0	1.44074	1.02412	NA	0.416611		NUTM2G	9	99691285	99701700	0.111944	0.325463	0	0.848485	0.151515	NA	-0.113054	-1.58999	-1.47693
ANKMY2	7	16639400	16685442	-	0.0722403	0.484972	0.272727	0.727273	0	0.848222	-0.259242	NA	1.10746		RFC3	13	34392205	34540695	0.112687	0.327003	0.030303	0.757576	0.212121	-0.464944	0.184791	-0.365678	-0.525479
GINS1	20	25388318	25429191	+	0.0723832	0.484972	0.515152	0.484848	0	-0.959214	-1.80428	NA	0.845067		CRAT	9	131857072	131873077	0.113349	0.327894	0	0.848485	0.151515	NA	-0.419252	-1.09	-0.670745
FASTKD3	5	7859271	7869150	-	0.0724535	0.484972	0.484848	0.515152	0	0.196044	-0.146077	NA	0.342121		MST4	X	131157244	131209971	0.11342	0.327894	0	0.666667	0.333333	NA	1.67605	0.374613	-1.30143
TRIM4	7	99488029	99517223	-	0.0724811	0.484972	0.212121	0.787879	0	0.878443	-0.00213147	NA	0.880574		ANKS6	9	101494290	101558824	0.113887	0.328536	0	0.848485	0.151515	NA	0.189775	-0.463633	-0.653408
SH3PXD2B	5	171752184	171881527	-	0.0727093	0.48559	0.484848	0.515152	0	-0.114407	-1.08288	NA	0.968475		PCDH20	13	61983817	61989655	0.114069	0.328536	0.030303	0.787879	0.181818	6.70486	3.46562	5.55562	1.97003
GSS	20	33516235	33543438	-	0.0732167	0.488066	0.515152	0.454545	0.030303	0.806015	0.378791	1.23663	0.373608		AK8	9	135600964	135754198	0.114438	0.328982	0	0.848485	0.151515	NA	1.35848	-0.298503	-1.65699
PTPN20B	10	48736873	48827966	-	0.0733779	0.488179	0.242424	0.757576	0	-0.215995	1.20237	NA	-1.41837		THOC1	18	214519	268059	0.115338	0.330578	0	0.363636	0.636364	NA	-0.267953	-0.807655	-0.539703
NPC2	14	74946642	74960084	-	0.0737562	0.488179	0.363636	0.636364	0	-0.785617	-0.290267	NA	-0.49535		RGP1	9	35749276	35753264	0.115516	0.330578	0	0.818182	0.181818	NA	0.687448	-0.831564	-1.51901
PCK1	20	56136136	56141513	+	0.0737884	0.488179	0.606061	0.393939	0	-4.6143	-2.53979	NA	-2.07451		TMEM185A	X	148678215	148713568	0.115638	0.330578	0	0.666667	0.333333	NA	0.144789	-0.100117	-0.244906
ARSJ	4	114821439	114900878	-	0.0739022	0.488179	0.424242	0.575758	0	1.35324	2.36894	NA	-1.01569		CEL	9	135937364	135947250	0.116524	0.332493	0	0.848485	0.151515	NA	-1.45166	-2.80398	-1.35232
EXOC6	10	94586587	94819251	+	0.07396	0.488179	0.212121	0.787879	0	1.39705	0.476469	NA	0.920584		C9orf3	9	97488950	97695955	0.117404	0.334383	0	0.818182	0.181818	NA	0.473088	-0.199196	-0.672283
C7	5	40909353	40984742	+	0.0743189	0.488179	0.454545	0.545455	0	-1.26587	-0.197697	NA	-1.06817		IPO5	13	98605928	98676550	0.118953	0.336662	0.030303	0.787879	0.181818	0.844754	0.228752	-0.108506	-0.360073
GM2A	5	150632612	150649955	+	0.0744319	0.488179	0.393939	0.606061	0	-0.0483508	-0.362645	NA	0.314294		KIF27	9	86451612	86536380	0.119027	0.336662	0	0.818182	0.181818	NA	0.0427689	-0.896246	-0.939014
TMEM168	7	112402436	112430478	-	0.074463	0.488179	0.272727	0.727273	0	0.0219376	-0.534314	NA	0.556251		UBE2A	X	118708429	118718392	0.119455	0.336662	0	0.666667	0.333333	NA	-0.368582	0.305565	0.674147
PEX2	8	77892493	77912524	-	0.0746035	0.488179	0.151515	0.848485	0	1.02095	0.282269	NA	0.738681		HSPH1	13	31709110	31736158	0.11955	0.336662	0.030303	0.787879	0.181818	1.20583	0.765829	0.125288	-0.656837
BMP2	20	6748744	6760927	+	0.0746739	0.488179	0.515152	0.484848	0	0.493104	-0.40867	NA	0.901775		DPP7	9	140004991	140009195	0.119772	0.336662	0	0.848485	0.151515	NA	1.57942	1.03129	-0.548126
ZNF335	20	44577291	44600833	-	0.0747782	0.488179	0.515152	0.484848	0	0.258616	0.0298863	NA	0.22873		TTF1	9	135250934	135282238	0.119814	0.336662	0	0.848485	0.151515	NA	-0.133754	-0.781743	-0.647989
CDHR1	10	85954390	85978452	+	0.0748732	0.488179	0.212121	0.787879	0	-6.97732	-4.28378	NA	-2.69355		SURF1	9	136218659	136223361	0.120514	0.336662	0	0.848485	0.151515	NA	0.117428	-0.45446	-0.571888
ANXA7	10	75134858	75173843	-	0.0753608	0.48985	0.242424	0.757576	0	2.06681	1.68781	NA	0.378997		DKC1	X	153991016	154005964	0.120538	0.336662	0	0.666667	0.333333	NA	0.564361	-0.341481	-0.905842
KIF20A	5	137514416	137523404	+	0.0754037	0.48985	0.424242	0.575758	0	0.246828	-1.05808	NA	1.30491		UXT	X	47511190	47518579	0.120595	0.336662	0	0.636364	0.363636	NA	-0.0171435	0.418477	0.435621
MTPAP	10	30598729	30638267	-	0.0755477	0.489894	0.212121	0.787879	0	0.801846	-0.0908748	NA	0.89272		RB1	13	48877882	49056026	0.120865	0.336662	0.030303	0.727273	0.242424	0.804503	-0.083626	-0.967514	-0.919413
TOMM7	7	22852250	22862471	-	0.0759007	0.490086	0.272727	0.727273	0	-1.64516	0.0512674	NA	-1.69643		F10	13	113777112	113803843	0.121284	0.336662	0.0909091	0.727273	0.181818	1.06589	1.93348	1.00615	-0.830926
CCNH	5	86690078	86708721	-	0.0760663	0.490086	0.454545	0.545455	0	-0.19862	0.185224	NA	-0.383844		CTIF	18	46065426	46389588	0.121402	0.336662	0	0.363636	0.636364	NA	0.27811	-0.368922	-0.647032
ZNF655	7	99156044	99162328	+	0.0761375	0.490086	0.212121	0.787879	0	0.911425	-0.314708	NA	1.22613		NR6A1	9	127279553	127533589	0.121408	0.336662	0	0.848485	0.151515	NA	-3.34283	-4.84261	-1.49978
LRWD1	7	102105329	102113615	+	0.0762334	0.490086	0.242424	0.757576	0	2.05669	1.26501	NA	0.791684		CARD9	9	139258407	139268133	0.121608	0.336662	0	0.848485	0.151515	NA	-0.416173	-1.78431	-1.36814
CXCL10	4	76942268	76944689	-	0.076263	0.490086	0.424242	0.575758	0	-3.04663	-1.76271	NA	-1.28391		MECP2	X	153287263	153363188	0.121753	0.336662	0	0.666667	0.333333	NA	0.977577	0.607839	-0.369738
KIF16B	20	16252748	16554079	-	0.0766645	0.491132	0.515152	0.484848	0	-0.98731	-0.516802	NA	-0.470508		C1GALT1C1	X	119759528	119764005	0.122001	0.336662	0	0.666667	0.333333	NA	0.295264	-0.911373	-1.20664
CDH24	14	23516269	23526747	-	0.0769942	0.491132	0.363636	0.636364	0	0.301146	-0.669378	NA	0.970524		NUDT10	X	51075082	51080377	0.122001	0.336662	0.0606061	0.575758	0.363636	0.56997	-0.233197	-1.72327	-1.56657
TWISTNB	7	19735084	19748660	-	0.0771766	0.491132	0.272727	0.727273	0	0.212483	-0.184643	NA	0.397126		GPR180	13	95254103	95286899	0.122144	0.336662	0.030303	0.787879	0.181818	1.55228	0.675576	0.356575	-0.351471
PPP1R35	7	100032899	100034096	-	0.077441	0.491132	0.212121	0.787879	0	0.970728	0.526162	NA	0.444566		HAUS6	9	19053134	19102940	0.122685	0.336827	0	0.818182	0.181818	NA	-0.362352	-1.10534	-0.742989
ZMIZ1	10	80828791	81076285	+	0.0774685	0.491132	0.212121	0.787879	0	0.509662	-0.398255	NA	0.907917		SPIN3	X	57002802	57021988	0.122691	0.336827	0	0.666667	0.333333	NA	1.25187	0.682804	-0.569063
BRD8	5	137475458	137514358	-	0.0774756	0.491132	0.424242	0.575758	0	1.25087	0.897918	NA	0.352949		FRRS1L	9	111892572	111929571	0.122861	0.336827	0	0.848485	0.151515	NA	2.49081	0.788005	-1.7028
ISOC1	5	128430441	128449721	+	0.0775007	0.491132	0.424242	0.575758	0	0.188616	-0.12979	NA	0.318406		CENPJ	13	25456411	25497027	0.123273	0.337059	0.0606061	0.757576	0.181818	-1.74296	-1.78457	-2.33636	-0.554868
TGFB3	14	76424403	76448365	-	0.0775852	0.491132	0.363636	0.636364	0	0.486243	-0.28244	NA	0.768684		ZNF782	9	99578550	99616770	0.123384	0.337059	0	0.848485	0.151515	NA	0.256663	-0.60157	-0.858234
RGS14	5	176784843	176799599	+	0.077663	0.491132	0.424242	0.575758	0	-0.996894	-0.298921	NA	-0.697973		ZC3H12C	11	109964086	110042566	0.123868	0.337518	0	0.848485	0.151515	NA	-0.0379237	-0.908261	-0.870337
MYOZ1	10	75391369	75401515	-	0.0779108	0.491829	0.242424	0.757576	0	3.84481	2.46917	NA	1.37565		ATP7A	X	77166152	77305892	0.123991	0.337518	0	0.666667	0.333333	NA	0.3394	-0.0437317	-0.383131
BEGAIN	14	101003483	101034407	-	0.0783081	0.493465	0.393939	0.606061	0	-1.53353	-0.523774	NA	-1.00976		TENM1	X	123509752	124097666	0.124868	0.339304	0	0.666667	0.333333	NA	-0.239782	-2.13271	-1.89293
ARMC10	7	102715327	102740210	+	0.0787436	0.495336	0.242424	0.727273	0.030303	0.627112	-0.186149	-1.03699	0.847294		TRUB2	9	131071378	131084497	0.125195	0.339594	0	0.848485	0.151515	NA	0.0277412	-0.553135	-0.580877
ELFN1	7	1748797	1787590	+	0.0789412	0.495707	0.272727	0.727273	0	3.1979	1.14566	NA	2.05225		ZNF236	18	74534562	74682683	0.125989	0.34027	0.030303	0.333333	0.636364	0.886614	0.117383	-0.250348	-0.431833
APOPT1	14	104029293	104041069	+	0.0794769	0.496289	0.393939	0.606061	0	0.300949	-0.399078	NA	0.700027		ADAMTSL1	9	18474078	18910948	0.126261	0.34027	0	0.818182	0.181818	NA	-1.87294	-3.5834	-1.71045
HAUS3	4	2233562	2243891	-	0.0796709	0.496289	0.424242	0.575758	0	0.334142	-0.0904536	NA	0.424596		OLFML2A	9	127539436	127577170	0.12648	0.34027	0	0.848485	0.151515	NA	-1.43769	-2.68576	-1.24807
TMEM173	5	138855112	138861887	-	0.0796931	0.496289	0.424242	0.575758	0	-0.77452	-0.17778	NA	-0.59674		RABGAP1	9	125703287	125867147	0.126511	0.34027	0	0.848485	0.151515	NA	0.550988	-0.760321	-1.31131
ACHE	7	100487614	100493541	-	0.0797179	0.496289	0.242424	0.757576	0	-1.80346	-3.22626	NA	1.4228		ZNF630	X	47917566	47930508	0.12655	0.34027	0	0.636364	0.363636	NA	0.305056	-0.0759633	-0.381019
SPDYE3	7	99905324	99919819	+	0.0799636	0.496289	0.212121	0.787879	0	1.0555	0.569297	NA	0.4862		GPR173	X	53078505	53109797	0.128015	0.343228	0.0606061	0.606061	0.333333	3.63022	2.9406	2.30912	-0.694177
GINS4	8	41386724	41402565	+	0.0802029	0.496289	0.151515	0.848485	0	1.00654	0.0813447	NA	0.925195		PQLC1	18	77662419	77711653	0.128097	0.343228	0.0606061	0.393939	0.545455	0.933131	0.437308	-0.0835499	-0.586967
CUL2	10	35297478	35363258	-	0.0802959	0.496289	0.212121	0.787879	0	0.650496	0.333449	NA	0.317047		C9orf40	9	77561498	77567802	0.12897	0.344966	0	0.818182	0.181818	NA	-0.820745	-1.50406	-0.683311
MYT1	20	62795826	62873606	+	0.080324	0.496289	0.575758	0.424242	0	5.33941	4.56614	NA	0.773263		FAM206A	9	111696672	111703238	0.129511	0.345811	0	0.848485	0.151515	NA	-0.843352	-1.33554	-0.492184
TRMT5	14	61438158	61447797	-	0.0803375	0.496289	0.393939	0.606061	0	0.95133	0.599813	NA	0.351518		RENBP	X	153200721	153210232	0.130124	0.346298	0	0.666667	0.333333	NA	0.397552	-0.184431	-0.581983
ARHGAP10	4	148653452	148993927	+	0.0804329	0.496289	0.424242	0.575758	0	2.04853	1.14965	NA	0.898876		TOR4A	9	140172279	140177093	0.130317	0.346298	0	0.848485	0.151515	NA	-1.45653	-2.53521	-1.07868
CCNB1	5	68462836	68474072	+	0.0805619	0.496289	0.424242	0.575758	0	0.103999	-0.725434	NA	0.829433		B3GALTL	13	31774111	31906411	0.130368	0.346298	0.030303	0.787879	0.181818	0.221618	0.993271	-0.00305787	-0.967749
TM9SF1	14	24658348	24664942	-	0.0809609	0.497889	0.363636	0.636364	0	0.867811	0.454322	NA	0.413489		TCEAL6	X	101394932	101397388	0.130654	0.346457	0	0.727273	0.272727	NA	2.62404	0.968338	-1.6557
HECTD2	10	93170041	93223421	+	0.0812737	0.498954	0.212121	0.787879	0	1.34515	0.332941	NA	1.01221		RANBP6	9	6011018	6015640	0.131109	0.347066	0	0.818182	0.181818	NA	0.873067	0.158191	-0.714876
EGLN3	14	34393420	34420032	-	0.0814883	0.499413	0.393939	0.606061	0	-3.40533	-2.08726	NA	-1.31807		ATP11A	13	113344642	113541482	0.131501	0.347337	0.0909091	0.727273	0.181818	-1.08929	-0.914327	-1.36507	-0.4313
PIP4K2A	10	22823765	23003037	-	0.0819539	0.500721	0.212121	0.787879	0	-0.80763	-0.093163	NA	-0.714467		MALT1	18	56338617	56417371	0.131818	0.347337	0	0.363636	0.636364	NA	-1.33147	-1.75084	-0.419371
SGK3	8	67624652	67774257	+	0.0820668	0.500721	0.151515	0.848485	0	0.366221	-0.226029	NA	0.59225		ZCCHC2	18	60190657	60245818	0.131889	0.347337	0	0.363636	0.636364	NA	-0.226037	-0.61408	-0.388044
C10orf25	10	45489379	45496358	-	0.0822961	0.500721	0.272727	0.727273	0	1.20023	0.714441	NA	0.485785		ZNF483	9	114287438	114306712	0.132227	0.347632	0	0.848485	0.151515	NA	2.85119	2.01268	-0.838516
PCSK2	20	17206751	17465223	+	0.0823657	0.500721	0.515152	0.484848	0	6.44767	5.13814	NA	1.30953		C9orf172	9	139738866	139741797	0.132862	0.348705	0	0.848485	0.151515	NA	2.60909	1.54138	-1.06771
PUS7	7	105096947	105148967	-	0.0824025	0.500721	0.272727	0.727273	0	0.549816	0.145039	NA	0.404777		ZCCHC18	X	103357216	103360538	0.133656	0.350193	0	0.666667	0.333333	NA	0.682824	-0.101089	-0.783913
PI3	20	43803539	43805185	+	0.0826743	0.500826	0.515152	0.484848	0	-2.5209	-0.830719	NA	-1.69019		ANGPTL2	9	129849627	129885044	0.1342	0.351021	0	0.848485	0.151515	NA	-1.62006	-2.70983	-1.08977
JAG2	14	105607317	105635161	-	0.0827001	0.500826	0.333333	0.666667	0	1.23335	0.597675	NA	0.635676		BGN	X	152760346	152775012	0.134817	0.352034	0	0.666667	0.333333	NA	1.97647	2.83939	0.862925
ATG10	5	81267843	81551213	+	0.0831244	0.502544	0.454545	0.545455	0	0.702424	0.147877	NA	0.554548		PRRC2B	9	134305476	134375578	0.135348	0.352822	0	0.848485	0.151515	NA	0.823988	0.0905778	-0.733411
OTUB2	14	94492723	94515276	+	0.083527	0.503678	0.363636	0.636364	0	3.07709	2.28091	NA	0.796181		STRBP	9	125883898	126030843	0.135797	0.353394	0	0.848485	0.151515	NA	-0.290157	-0.914611	-0.624454
PF4	4	74846541	74847841	-	0.0836445	0.503678	0.393939	0.606061	0	0.463236	-0.363098	NA	0.826334		LAS1L	X	64732461	64754686	0.136115	0.353623	0.0606061	0.636364	0.30303	0.534244	0.599648	0.396164	-0.197797
DDHD1	14	53503457	53620046	-	0.0837348	0.503678	0.393939	0.606061	0	0.372535	-0.316166	NA	0.688701		SMCHD1	18	2655885	2805015	0.136499	0.354022	0	0.363636	0.636364	NA	-0.542672	-1.28964	-0.746964
CPSF2	14	92588297	92630543	+	0.0841249	0.505174	0.363636	0.636364	0	0.707476	0.419945	NA	0.287531		PIEZO2	18	10670243	11148761	0.137477	0.355271	0	0.363636	0.636364	NA	-1.18429	-2.18063	-0.996341
SPINK1	5	147204142	147218794	-	0.084878	0.507628	0.393939	0.606061	0	-2.91869	-0.902882	NA	-2.01581		ZBTB14	18	5289017	5295701	0.137534	0.355271	0	0.363636	0.636364	NA	0.290673	-0.123541	-0.414214
MTHFD1	14	64854758	64926725	+	0.0848851	0.507628	0.393939	0.606061	0	0.647939	0.146854	NA	0.501085		TAL2	9	108424737	108425393	0.137796	0.355271	0	0.848485	0.151515	NA	0.590449	-0.20909	-0.799539
HSD17B4	5	118788137	118878030	+	0.0850273	0.507628	0.424242	0.575758	0	-0.27469	-0.758528	NA	0.483838		C9orf173	9	140145712	140147934	0.138052	0.355271	0	0.848485	0.151515	NA	0.0395536	-1.34745	-1.387
UFSP1	7	100486343	100487339	-	0.0851019	0.507628	0.242424	0.757576	0	0.825711	0.344317	NA	0.481394		LRRC26	9	140063209	140064491	0.138592	0.355271	0	0.848485	0.151515	NA	-2.32043	-3.87928	-1.55886
SPOCK2	10	73818791	73848531	-	0.0852555	0.507697	0.212121	0.757576	0.030303	-1.34687	-0.677628	-0.709052	-0.668031		DDX58	9	32455299	32526322	0.138593	0.355271	0	0.818182	0.181818	NA	-0.623269	-1.14358	-0.520308
RAB33B	4	140374960	140397070	+	0.0855696	0.508448	0.424242	0.575758	0	0.813155	0.289453	NA	0.523702		IL33	9	6215148	6257983	0.138597	0.355271	0	0.818182	0.181818	NA	-0.347423	-1.74536	-1.39794
SYNDIG1	20	24449834	24647253	+	0.0856664	0.508448	0.515152	0.484848	0	-0.72153	-1.73537	NA	1.01384		NFATC1	18	77155771	77228002	0.139728	0.357573	0.030303	0.363636	0.606061	-3.72087	-0.693833	-1.61579	-0.68911
METTL10	10	126446399	126480510	-	0.0860921	0.510128	0.212121	0.787879	0	0.472898	-0.117607	NA	0.590505		PLGRKT	9	5357965	5437937	0.140388	0.358665	0	0.818182	0.181818	NA	-1.32407	-1.95805	-0.633982
SLIRP	14	78174413	78183941	+	0.0866784	0.512751	0.363636	0.636364	0	0.294251	-0.297162	NA	0.591413		ZCCHC6	9	88902647	88969365	0.141417	0.360462	0	0.818182	0.181818	NA	-0.698563	-1.13584	-0.437279
HUS1	7	48002884	48019222	-	0.087208	0.515032	0.212121	0.787879	0	0.657353	0.365449	NA	0.291904		DNAI1	9	34458749	34520987	0.14166	0.360462	0	0.818182	0.181818	NA	3.14653	1.90136	-1.24517
DOK3	5	176928904	176937427	-	0.0874493	0.515604	0.424242	0.575758	0	-1.43114	-0.91166	NA	-0.519479		GLDC	9	6532463	6645692	0.141794	0.360462	0	0.818182	0.181818	NA	1.39339	3.20218	1.80879
RAB28	4	13369346	13485989	-	0.0877318	0.516061	0.424242	0.575758	0	1.34278	0.872125	NA	0.470659		ZNF521	18	22641887	22932214	0.142165	0.360547	0	0.363636	0.636364	NA	-1.13344	-2.087	-0.953562
WDR20	14	102606155	102690010	+	0.0878156	0.516061	0.393939	0.606061	0	0.897951	0.29796	NA	0.599991		CDC37L1	9	4679552	4708399	0.142296	0.360547	0	0.818182	0.181818	NA	0.560366	0.0310888	-0.529277
EXOSC1	10	99195665	99205774	-	0.0879923	0.516249	0.212121	0.787879	0	0.926894	-0.187685	NA	1.11458		TMEM252	9	71151495	71155783	0.143667	0.362575	0	0.818182	0.181818	NA	-4.89607	-6.13921	-1.24313
ANKRD50	4	125585202	125633887	-	0.0881867	0.516249	0.424242	0.575758	0	-0.627741	-1.26381	NA	0.636067		TMEM141	9	139685776	139687769	0.143754	0.362575	0	0.848485	0.151515	NA	1.18914	-1.3571	-2.54624
POLR3F	20	18448032	18465292	+	0.0882811	0.516249	0.545455	0.454545	0	0.867998	0.451713	NA	0.416284		ARMCX1	X	100805513	100809683	0.143804	0.362575	0	0.666667	0.333333	NA	1.48124	0.967286	-0.513956
ZNF800	7	127010096	127032778	-	0.0885762	0.517129	0.272727	0.727273	0	-0.187697	-0.707542	NA	0.519845		C9orf116	9	138387025	138391761	0.144314	0.363264	0	0.848485	0.151515	NA	1.05832	0.0315204	-1.0268
MDH2	7	75677336	75678365	+	0.0891573	0.518137	0.212121	0.787879	0	-0.77736	0.125681	NA	-0.903041		TRIM13	13	50571142	50592603	0.145227	0.364044	0.0606061	0.69697	0.242424	3.39404	1.55117	0.435419	-1.26318
PCDHB5	5	140514787	140517709	+	0.0892027	0.518137	0.454545	0.545455	0	3.77741	2.3119	NA	1.46551		SYN1	X	47431299	47479256	0.145311	0.364044	0	0.636364	0.363636	NA	5.01777	4.11916	-0.898608
PARP11	12	3918026	3982614	-	0.0892857	0.518137	0.151515	0.848485	0	1.0947	0.384498	NA	0.710198		TMEM187	X	153237990	153248646	0.145478	0.364044	0	0.666667	0.333333	NA	0.35092	-0.424917	-0.775836
XRCC2	7	152343582	152373250	-	0.0895266	0.518137	0.272727	0.727273	0	0.175608	-0.898066	NA	1.07367		AKAP2	9	112810877	112934792	0.145716	0.364044	0	0.848485	0.151515	NA	-1.08552	-2.18883	-1.10331
BCAS4	20	49411430	49493714	+	0.0895874	0.518137	0.575758	0.424242	0	0.318831	0.91437	NA	-0.595539		OTC	X	38211735	38280703	0.145807	0.364044	0	0.636364	0.363636	NA	-3.43747	-1.63542	1.80205
DBN1	5	176883613	176899871	-	0.0896258	0.518137	0.424242	0.575758	0	2.04861	1.01681	NA	1.0318		TBL1X	X	9431334	9687780	0.146174	0.364369	0	0.636364	0.363636	NA	2.08119	1.43086	-0.650326
HINT1	5	130494975	130501041	-	0.089764	0.518137	0.484848	0.484848	0.030303	-1.19517	0.115154	-0.357005	-1.28255		CDKL5	X	18443724	18671749	0.147444	0.366536	0	0.606061	0.393939	NA	1.24916	0.753461	-0.495703
TYSND1	10	71897736	71904484	-	0.0901202	0.519253	0.212121	0.787879	0	1.98696	1.08751	NA	0.899449		SURF2	9	136223420	136228041	0.14752	0.366536	0	0.848485	0.151515	NA	0.629287	0.234936	-0.394351
RAB2B	14	21927178	21944832	-	0.090248	0.519253	0.363636	0.636364	0	1.25821	0.792011	NA	0.466201		ABHD17B	9	74477367	74526161	0.147993	0.367118	0	0.818182	0.181818	NA	-0.680719	-1.34704	-0.66632
H2AFY2	10	71812356	71872040	+	0.090511	0.519834	0.212121	0.787879	0	1.97381	1.47397	NA	0.499846		TSR2	X	54466807	54474465	0.14831	0.367313	0	0.636364	0.363636	NA	1.39217	1.10037	-0.291808
ANG	14	21152335	21162345	+	0.09064	0.519834	0.363636	0.636364	0	1.84011	1.2098	NA	0.630314		FNBP1	9	132649465	132805473	0.149885	0.37027	0	0.848485	0.151515	NA	-1.232	-2.19247	-0.96047
ZFP64	20	50700549	50808524	-	0.0913547	0.521879	0.575758	0.424242	0	0.562091	0.322283	NA	0.239808		OFD1	X	13752831	13787472	0.149986	0.37027	0	0.636364	0.363636	NA	-0.237319	-0.507415	-0.270096
SAP30	4	174292092	174298683	+	0.0914343	0.521879	0.393939	0.606061	0	-0.0663037	-0.489709	NA	0.423405		JAK2	9	4985085	5128183	0.150977	0.372119	0	0.818182	0.181818	NA	-0.44123	-1.2251	-0.783865
PCGF5	10	92922768	92987717	+	0.0914347	0.521879	0.212121	0.787879	0	-1.15236	-0.130388	NA	-1.02197		RBMX2	X	129535942	129547317	0.151504	0.372821	0	0.666667	0.333333	NA	0.252954	0.527317	0.274362
TPX2	20	30326903	30389603	+	0.0918813	0.523592	0.545455	0.454545	0	-0.36589	-1.49191	NA	1.12602		TAF1	X	70586088	70685855	0.151911	0.373147	0	0.666667	0.333333	NA	0.276852	-0.17853	-0.455382
USP54	10	75257295	75313098	-	0.0921885	0.524506	0.242424	0.757576	0	-0.914974	-0.545336	NA	-0.369638		MAGED4B	X	51804922	51812368	0.152321	0.373147	0.030303	0.606061	0.363636	1.58268	-0.353513	-1.29105	-1.02974
CLGN	4	141309606	141348815	-	0.092558	0.52562	0.424242	0.575758	0	3.82653	2.42909	NA	1.39744		ARHGAP20	11	110447758	110582773	0.152364	0.373147	0	0.848485	0.151515	NA	-0.227237	-1.45775	-1.23051
PARP12	7	139723543	139763521	-	0.0927296	0.52562	0.30303	0.69697	0	0.588873	-0.459786	NA	1.04866		ARHGEF39	9	35659340	35665278	0.15325	0.374628	0	0.818182	0.181818	NA	-0.510053	-1.94785	-1.43779
SYT16	14	62462540	62568427	+	0.0928257	0.52562	0.393939	0.606061	0	3.99608	5.54872	NA	-1.55263		TTC39C	18	21572736	21715574	0.153487	0.374628	0	0.363636	0.636364	NA	-0.219614	-1.0247	-0.805084
CTAGE8	7	143963766	143966877	-	0.0933278	0.527627	0.272727	0.727273	0	-2.70207	-1.44248	NA	-1.25959		SLN	11	107578100	107582787	0.153826	0.374628	0	0.848485	0.151515	NA	-0.823978	0.0813076	0.905286
ARL3	10	104433483	104474190	-	0.0936595	0.528428	0.212121	0.787879	0	2.13539	1.53172	NA	0.603675		BRWD3	X	79924986	80065233	0.153943	0.374628	0	0.666667	0.333333	NA	-0.604114	-1.06164	-0.45753
NFATC4	14	24836116	24848810	+	0.0937652	0.528428	0.363636	0.636364	0	0.992856	0.0981804	NA	0.894676		IL11RA	9	34652181	34661899	0.154563	0.375541	0	0.818182	0.181818	NA	0.0844522	-0.791059	-0.875511
LIAS	4	39460643	39465434	+	0.0941407	0.529487	0.484848	0.515152	0	0.441506	0.0259336	NA	0.415572		CXorf40B	X	149100414	149106716	0.15531	0.376761	0	0.666667	0.333333	NA	0.541071	0.200117	-0.340954
SSBP1	7	141438120	141450288	+	0.0943089	0.529487	0.272727	0.727273	0	0.554851	0.261451	NA	0.2934		C9orf41	9	77597872	77643310	0.156108	0.378102	0	0.818182	0.181818	NA	-0.585287	-1.11768	-0.532391
ZBTB46	20	62375020	62436856	-	0.0943978	0.529487	0.575758	0.424242	0	1.99262	1.37679	NA	0.615823		TYRP1	9	12693385	12710266	0.157527	0.380939	0	0.818182	0.181818	NA	-0.872778	-3.78808	-2.9153
ANK3	10	61786055	61900774	-	0.0946266	0.529939	0.212121	0.787879	0	-0.987414	0.225442	NA	-1.21286		CHRDL1	X	109917083	110039076	0.158905	0.383666	0	0.666667	0.333333	NA	-2.0278	-3.36366	-1.33586
DNAJB14	4	100817404	100867883	-	0.0950333	0.53041	0.424242	0.575758	0	0.522966	0.0750581	NA	0.447907		ZNF396	18	32946660	32957301	0.159317	0.384058	0	0.363636	0.636364	NA	1.23604	0.718693	-0.517348
SMARCA5	4	144434615	144478642	+	0.0951799	0.53041	0.424242	0.575758	0	0.646778	0.370933	NA	0.275845		ITM2A	X	78615880	78623049	0.160919	0.387158	0	0.666667	0.333333	NA	-1.3945	-2.11129	-0.716792
DKK2	4	107842958	107957453	-	0.0955984	0.53041	0.424242	0.575758	0	0.354525	-0.494791	NA	0.849316		ZCCHC12	X	117957705	117960936	0.161106	0.387158	0	0.666667	0.333333	NA	0.157948	-1.24115	-1.39909
LRBA	4	151185810	151936419	-	0.0959537	0.53041	0.424242	0.575758	0	0.957004	0.57518	NA	0.381824		G6PD	X	153759604	153775233	0.161623	0.387795	0	0.666667	0.333333	NA	0.591904	0.933109	0.341206
ANGEL1	14	77253585	77279283	-	0.0961775	0.53041	0.363636	0.636364	0	1.30899	0.944373	NA	0.364618		CDKN2B	9	22002901	22009312	0.162224	0.388631	0	0.818182	0.181818	NA	-2.52959	-3.82604	-1.29645
MEGF10	5	126626455	126760473	+	0.0963509	0.53041	0.454545	0.545455	0	0.776283	-0.644226	NA	1.42051		ACO1	9	32384600	32450834	0.162745	0.389273	0	0.818182	0.181818	NA	-0.78595	-1.35688	-0.570932
HOPX	4	57514153	57547872	-	0.0969709	0.53041	0.424242	0.575758	0	1.67756	2.95097	NA	-1.2734		MTCP1	X	154292308	154299547	0.164081	0.391859	0	0.666667	0.333333	NA	-0.237294	1.04252	1.27981
IGFBP3	7	45951843	45960871	-	0.0971265	0.53041	0.242424	0.757576	0	0.564405	-0.192948	NA	0.757353		MPDZ	9	13105702	13279563	0.165021	0.393493	0	0.818182	0.181818	NA	-0.595579	-1.82142	-1.22584
TAS2R4	7	141478288	141479188	+	0.0971711	0.53041	0.272727	0.727273	0	1.10019	-0.0523632	NA	1.15255		ASB9	X	15262108	15288293	0.165799	0.394269	0	0.636364	0.363636	NA	-0.589007	0.0381608	0.627168
MRGBP	20	61427756	61433090	+	0.0973924	0.53041	0.575758	0.424242	0	-0.176992	-0.547813	NA	0.370821		SPATA13	13	24553764	24881212	0.166097	0.394269	0.0909091	0.727273	0.181818	0.192082	0.740955	-0.220283	-0.900253
KIT	4	55524094	55606881	+	0.0974557	0.53041	0.424242	0.575758	0	-1.7372	-2.63504	NA	0.897837		POMP	13	29233140	29253094	0.166169	0.394269	0.030303	0.818182	0.151515	-0.304836	-0.538854	-2.14835	-1.61786
VIM	10	17270257	17279592	+	0.097531	0.53041	0.212121	0.787879	0	-1.38569	-0.765082	NA	-0.620606		MEGF9	9	123363195	123476765	0.166723	0.394269	0	0.848485	0.151515	NA	0.322221	-0.4161	-0.73832
ZC3HC1	7	129658125	129691291	-	0.0975806	0.53041	0.272727	0.727273	0	1.05369	0.715013	NA	0.338678		BAG1	9	33252468	33264759	0.166829	0.394269	0	0.818182	0.181818	NA	-0.261812	-0.953428	-0.691616
MOB1B	4	71768056	71842460	+	0.0976305	0.53041	0.393939	0.606061	0	1.76034	0.845766	NA	0.914569		SURF4	9	136228324	136243037	0.167	0.394269	0	0.848485	0.151515	NA	-0.314323	-0.809966	-0.495643
FAM115A	7	143548460	143599172	-	0.0976496	0.53041	0.272727	0.727273	0	1.42416	1.0413	NA	0.382869		CKAP2	13	53029494	53039978	0.167142	0.394269	0.030303	0.757576	0.212121	-0.210098	-0.225724	-0.680317	-0.455193
KIF5B	10	32297937	32345371	-	0.0977316	0.53041	0.212121	0.787879	0	-0.0314141	-0.427796	NA	0.396382		RFXAP	13	37393338	37403740	0.1685	0.396866	0.030303	0.757576	0.212121	1.82036	0.670126	0.375385	-0.338981
LARP1	5	154092461	154197167	+	0.0977502	0.53041	0.393939	0.606061	0	1.14667	0.477122	NA	0.669548		CNTFR	9	34551429	34589735	0.168802	0.396968	0	0.818182	0.181818	NA	-2.21326	-2.88729	-0.674035
ITPRIP	10	106069453	106088750	-	0.0978795	0.53041	0.212121	0.787879	0	-1.92948	-0.035625	NA	-1.89385		RAB40A	X	102754680	102774417	0.16932	0.397578	0	0.666667	0.333333	NA	1.1115	0.133834	-0.977669
SPRY4	5	141689991	141703982	-	0.0980325	0.53041	0.454545	0.545455	0	-0.675294	-0.0093801	NA	-0.665914		LANCL3	X	37430821	37536750	0.169602	0.397634	0	0.636364	0.363636	NA	-0.894162	-2.05056	-1.1564
ENPP6	4	185009858	185139114	-	0.098282	0.53041	0.454545	0.545455	0	1.97467	3.77575	NA	-1.80108		ZBTB33	X	119384606	119392251	0.170652	0.398895	0	0.666667	0.333333	NA	0.318286	0.044665	-0.273621
PLEKHA1	10	124134093	124191871	+	0.0983117	0.53041	0.212121	0.787879	0	2.69257	0.747549	NA	1.94502		TRO	X	54946995	54957864	0.170806	0.398895	0	0.666667	0.333333	NA	4.1529	2.86782	-1.28508
SPON2	4	1160719	1202750	-	0.0983914	0.53041	0.424242	0.575758	0	-1.35961	-0.735126	NA	-0.624482		KCNG2	18	77623667	77659816	0.170918	0.398895	0.0606061	0.393939	0.545455	-0.842007	-1.40964	-0.549984	0.783974
VOPP1	7	55538300	55594573	-	0.0984175	0.53041	0.242424	0.757576	0	-1.04235	1.81195	NA	-2.8543		GPR174	X	78426468	78427726	0.171249	0.399063	0	0.666667	0.333333	NA	-2.90234	-4.00589	-1.10355
JDP2	14	75894508	75939404	+	0.0987312	0.53041	0.363636	0.636364	0	-0.49779	0.436454	NA	-0.934244		NEK6	9	127019884	127114721	0.172052	0.400326	0	0.848485	0.151515	NA	-1.23784	-2.18592	-0.948073
CLMN	14	95648275	95786245	-	0.0987945	0.53041	0.393939	0.606061	0	-0.248916	0.303218	NA	-0.552135		KDELC1	13	103436630	103451404	0.172396	0.400477	0.030303	0.787879	0.181818	0.383696	-0.0695681	0.287773	0.340553
UGT2B7	4	69962191	69978705	+	0.0988157	0.53041	0.363636	0.636364	0	0.836413	2.40438	NA	-1.56797		PQBP1	X	48755194	48760420	0.172687	0.400477	0	0.636364	0.363636	NA	0.797279	0.357295	-0.439984
PSMF1	20	1093871	1152890	+	0.098953	0.53041	0.454545	0.545455	0	1.14717	0.535429	NA	0.611737		RAB14	9	123940414	123964365	0.172898	0.400477	0	0.848485	0.151515	NA	-0.0822595	-0.478839	-0.39658
CYP2C18	10	96443250	96495947	+	0.0990128	0.53041	0.212121	0.787879	0	-5.84002	-2.69901	NA	-3.14101		EFNB2	13	107142078	107187388	0.174044	0.401546	0.030303	0.787879	0.181818	0.11691	-1.24126	-1.68555	-0.494589
CBFA2T2	20	32077927	32237837	+	0.0990431	0.53041	0.484848	0.484848	0.030303	0.85784	0.161227	1.0459	0.644574		MYCBP2	13	77618791	77901177	0.174263	0.401546	0.030303	0.787879	0.181818	1.28639	0.178334	-0.152303	-0.371676
MOCS3	20	49575350	49578400	+	0.0992816	0.53041	0.575758	0.424242	0	0.934244	0.0660288	NA	0.868215		ZNF157	X	47229998	47273098	0.174423	0.401546	0	0.636364	0.363636	NA	3.61442	2.65444	-0.959977
CSE1L	20	47662782	47713497	+	0.0993127	0.53041	0.545455	0.454545	0	0.722585	0.359012	NA	0.363574		TNC	9	117781853	117880536	0.174643	0.401546	0	0.818182	0.181818	NA	-1.84625	-2.95813	-1.11188
BRAF	7	140433811	140624564	-	0.0997329	0.530471	0.30303	0.69697	0	1.02025	0.559664	NA	0.460585		SYP	X	49044264	49056661	0.174795	0.401546	0	0.636364	0.363636	NA	2.88937	2.23424	-0.655132
ZFP62	5	180274610	180288286	-	0.0998074	0.530471	0.454545	0.545455	0	1.27276	-0.711562	NA	1.98432		GRIA4	11	105480799	105784231	0.175196	0.401546	0	0.848485	0.151515	NA	-1.83778	0.0548371	1.89262
JADE2	5	133860065	133918920	+	0.0999186	0.530471	0.424242	0.575758	0	0.144891	1.09361	NA	-0.948718		CBLN2	18	70203914	70211723	0.175762	0.401546	0.030303	0.333333	0.636364	1.52873	0.520944	1.34794	0.743011
ZNF25	10	38238499	38264908	-	0.100075	0.530471	0.212121	0.757576	0.030303	1.32718	0.480867	0.881338	0.830911		DNAJC25	9	114393631	114416631	0.175789	0.401546	0	0.848485	0.151515	NA	-0.218701	-0.623985	-0.405284
SNX18	5	53813588	53842416	+	0.100261	0.530471	0.454545	0.545455	0	-0.446769	0.0894917	NA	-0.536261		PGM5	9	70971814	71145977	0.175848	0.401546	0	0.818182	0.181818	NA	-2.88506	-4.37459	-1.48952
PLOD3	7	100849257	100861011	-	0.100284	0.530471	0.242424	0.757576	0	-0.0248035	-0.948836	NA	0.924033		SHROOM2	X	9754495	9917483	0.17597	0.401546	0	0.636364	0.363636	NA	3.15543	2.55363	-0.601801
NEK1	4	170314420	170533778	-	0.100446	0.530471	0.424242	0.575758	0	0.767329	0.273515	NA	0.493814		GAPVD1	9	128024072	128127290	0.176531	0.402229	0	0.848485	0.151515	NA	0.0701056	-0.644534	-0.714639
PRKAA1	5	40759480	40798297	-	0.100551	0.530471	0.454545	0.545455	0	0.55271	0.185675	NA	0.367035		MAGED4	X	51927918	51935364	0.177936	0.404309	0.030303	0.606061	0.363636	1.7137	-0.440942	-1.35728	-1.01894
TFAP2C	20	55204357	55214339	+	0.100946	0.530471	0.606061	0.393939	0	-2.03336	-0.782259	NA	-1.25111		RPS4X	X	71492452	71497141	0.17797	0.404309	0	0.666667	0.333333	NA	-0.197107	-0.638086	-0.440979
CBR4	4	169908740	169931468	-	0.101002	0.530471	0.424242	0.575758	0	0.464565	0.154531	NA	0.310034		ESCO1	18	19109261	19180693	0.179588	0.407384	0	0.363636	0.636364	NA	-0.315011	-0.715262	-0.400251
SMIM19	8	42396297	42408140	+	0.10108	0.530471	0.151515	0.848485	0	-0.0794696	-0.455098	NA	0.375628		GATA1	X	48644981	48652718	0.180291	0.408339	0	0.636364	0.363636	NA	-1.014	-1.61619	-0.60219
ALDH18A1	10	97365685	97416279	-	0.101106	0.530471	0.212121	0.787879	0	-1.84436	-1.03855	NA	-0.805806		RAB9B	X	103077254	103087212	0.180659	0.408339	0	0.666667	0.333333	NA	1.90155	1.12158	-0.779968
HM13	20	30102212	30157370	+	0.101503	0.531772	0.484848	0.515152	0	0.917132	0.503282	NA	0.41385		EPB41L4B	9	111934253	112083244	0.180922	0.408339	0	0.848485	0.151515	NA	-0.021741	-1.04605	-1.02431
C7orf26	7	6629651	6648357	+	0.101802	0.53207	0.272727	0.727273	0	0.722246	0.449751	NA	0.272495		KANK1	9	470293	746106	0.181221	0.408339	0	0.818182	0.181818	NA	-1.2362	-2.1467	-0.910503
RPS3A	4	152020724	152025357	+	0.101857	0.53207	0.424242	0.575758	0	0.264332	-0.179597	NA	0.44393		CLUL1	18	596997	650298	0.181336	0.408339	0	0.363636	0.636364	NA	1.49426	0.531312	-0.962949
SLPI	20	43880879	43883205	-	0.102042	0.532259	0.515152	0.484848	0	-0.65094	0.339907	NA	-0.990847		DENND1A	9	126141932	126692417	0.181713	0.408589	0	0.848485	0.151515	NA	-0.223015	-0.762846	-0.539832
THAP6	4	76439642	76455236	+	0.102403	0.532803	0.424242	0.575758	0	0.592618	-0.237712	NA	0.83033		BSPRY	9	116111811	116133513	0.182794	0.410419	0	0.848485	0.151515	NA	0.369554	1.48373	1.11418
XRCC3	14	104163953	104181823	-	0.102445	0.532803	0.393939	0.606061	0	0.836431	0.468395	NA	0.368036		TUSC1	9	25676386	25678856	0.184022	0.412574	0	0.818182	0.181818	NA	-0.667523	-1.58717	-0.919651
SIRPB2	20	1455235	1472233	-	0.103137	0.535621	0.454545	0.545455	0	-1.03305	-1.60892	NA	0.575872		CCDC180	9	100069909	100141033	0.185774	0.414424	0	0.848485	0.151515	NA	0.61011	-1.45286	-2.06297
FAM161B	14	74399694	74417117	-	0.103917	0.536997	0.363636	0.636364	0	0.732618	1.18737	NA	-0.454749		PTGR1	9	114312001	114362135	0.185812	0.414424	0	0.848485	0.151515	NA	-0.956653	-1.77305	-0.816401
KLKB1	4	187148624	187179628	+	0.103927	0.536997	0.454545	0.545455	0	-0.877093	0.508032	NA	-1.38513		HSFX2	X	148674171	148676970	0.186076	0.414424	0	0.666667	0.333333	NA	0.531465	0.0992137	-0.432251
PI4K2A	10	99400442	99436191	+	0.104014	0.536997	0.212121	0.787879	0	1.55662	-0.0211409	NA	1.57776		EBPL	13	50234811	50265623	0.186134	0.414424	0.0606061	0.69697	0.242424	-0.255528	0.254294	-0.398563	-0.612071
TRUB1	10	116697951	116737439	+	0.104338	0.536997	0.212121	0.787879	0	0.793307	0.363465	NA	0.429842		SHISA2	13	26618734	26625198	0.186194	0.414424	0.0606061	0.757576	0.181818	0.238877	0.0537025	-0.76725	-0.834669
MAPK8	10	49514681	49647403	+	0.104489	0.536997	0.242424	0.757576	0	1.86719	0.585337	NA	1.28185		PHPT1	9	139743267	139745495	0.187191	0.416039	0	0.848485	0.151515	NA	0.180493	-1.18905	-1.36955
CENPU	4	185615218	185655286	-	0.104582	0.536997	0.454545	0.545455	0	-0.44188	-1.22165	NA	0.779768		SETBP1	18	42260137	42457379	0.187847	0.416897	0	0.363636	0.636364	NA	1.23764	0.648464	-0.589171
EPB41L1	20	34679425	34820721	+	0.104614	0.536997	0.545455	0.454545	0	1.80718	1.16911	NA	0.638062		PRRG1	X	37208527	37301477	0.190137	0.42137	0	0.636364	0.363636	NA	-1.20563	-0.732498	0.473129
TMEM229A	7	123670969	123673523	-	0.104761	0.536997	0.272727	0.727273	0	-5.54276	-3.65112	NA	-1.89164		USP51	X	55511048	55515631	0.190653	0.421905	0	0.666667	0.333333	NA	2.33112	1.65456	-0.676562
UBN2	7	138916230	138992982	+	0.10478	0.536997	0.30303	0.69697	0	0.461857	-0.086699	NA	0.548556		SETDB2	13	50018428	50069139	0.191222	0.422557	0.0606061	0.69697	0.242424	-0.502974	-0.0678871	-0.584413	-0.481719
ZEB1	10	31607423	31818742	+	0.105259	0.536997	0.212121	0.787879	0	0.294686	-0.550786	NA	0.845472		GARNL3	9	130025940	130155828	0.191936	0.423526	0	0.848485	0.151515	NA	0.240573	-0.68083	-0.921404
SPARC	5	151040656	151066615	-	0.105303	0.536997	0.393939	0.606061	0	0.420966	-0.260273	NA	0.681239		SYK	9	93563961	93660842	0.192259	0.423632	0	0.818182	0.181818	NA	-2.74106	-3.87607	-1.13501
MNAT1	14	61201458	61435398	+	0.105392	0.536997	0.393939	0.606061	0	1.0329	0.673353	NA	0.359544		PHKA2	X	18910415	19002480	0.193693	0.425322	0	0.606061	0.393939	NA	0.284531	0.0174174	-0.267114
PCDH18	4	138440071	138453652	-	0.105478	0.536997	0.424242	0.575758	0	-0.816211	-1.74669	NA	0.930475		CXorf56	X	118672111	118699372	0.193794	0.425322	0	0.666667	0.333333	NA	0.357145	0.0351255	-0.32202
PRSS1	7	142457318	142460927	+	0.105506	0.536997	0.272727	0.727273	0	-4.83639	-2.19876	NA	-2.63763		NR4A3	9	102584136	102596341	0.193856	0.425322	0	0.848485	0.151515	NA	-1.19173	-2.55305	-1.36132
AP4S1	14	31494311	31565656	+	0.10626	0.539325	0.393939	0.606061	0	1.6384	1.02063	NA	0.61777		NPR2	9	35792405	35809728	0.194179	0.425423	0	0.818182	0.181818	NA	-0.484241	-1.50667	-1.02242
EDN3	20	57875481	57901047	+	0.106265	0.539325	0.575758	0.424242	0	-7.03539	-5.21139	NA	-1.824		MTAP	9	21802634	21865970	0.194697	0.425952	0	0.818182	0.181818	NA	-0.743022	-1.66437	-0.921349
ADH1C	4	100257648	100274202	-	0.106939	0.541976	0.424242	0.575758	0	-2.67734	-1.17229	NA	-1.50505		TTR	18	29171729	29178987	0.195048	0.426113	0	0.363636	0.636364	NA	6.74924	8.51331	1.76407
WDR96	10	105889645	105992120	-	0.107155	0.5423	0.212121	0.787879	0	2.44821	1.48478	NA	0.963437		SMARCA1	X	128580477	128657482	0.195384	0.426241	0	0.636364	0.363636	NA	2.31948	1.76221	-0.557274
PET117	20	18118498	18123813	+	0.107308	0.542307	0.545455	0.454545	0	0.490246	2.46169	NA	-1.97145		ENOX2	X	129757352	130037291	0.195886	0.426733	0	0.666667	0.333333	NA	-0.0413386	0.15593	0.197268
KCNK10	14	88646451	88737255	-	0.107685	0.542933	0.363636	0.636364	0	0.996001	2.66601	NA	-1.67001		KAL1	X	8496914	8700227	0.196807	0.426888	0	0.666667	0.333333	NA	3.47304	2.78306	-0.689975
TMEM180	10	104221148	104236802	+	0.107833	0.542933	0.212121	0.787879	0	1.22643	0.843095	NA	0.383334		FOXD4	9	116230	118417	0.196942	0.426888	0	0.818182	0.181818	NA	1.92297	0.276129	-1.64684
SNX8	7	2291404	2354110	-	0.108116	0.542933	0.272727	0.727273	0	-0.0830847	-0.32023	NA	0.237145		P2RY10	X	78200828	78219224	0.197058	0.426888	0	0.666667	0.333333	NA	-2.38983	-1.53022	0.85961
ECD	10	74894281	74927853	-	0.108156	0.542933	0.242424	0.757576	0	0.989126	0.69407	NA	0.295056		SATL1	X	84347291	84363974	0.197068	0.426888	0	0.666667	0.333333	NA	0.361424	0.130525	-0.230899
CDX1	5	149546343	149564121	+	0.108192	0.542933	0.393939	0.606061	0	-6.49828	-3.83557	NA	-2.66272		CDC26	9	116029287	116037869	0.198351	0.429062	0	0.848485	0.151515	NA	-0.286897	-0.679504	-0.392606
SERPINA4	14	95027756	95036250	+	0.109127	0.546859	0.363636	0.636364	0	6.79667	4.88687	NA	1.9098		GPR119	X	129518318	129519511	0.198824	0.429482	0	0.666667	0.333333	NA	-0.632732	0.266067	0.898799
NXT1	20	23331372	23335408	+	0.109608	0.54693	0.484848	0.515152	0	0.910964	0.516358	NA	0.394606		PLXNA3	X	153686620	153701989	0.199846	0.431084	0	0.666667	0.333333	NA	0.997761	0.13933	-0.858431
KCNG1	20	49620192	49639675	-	0.109773	0.54693	0.575758	0.424242	0	-4.77683	-3.46429	NA	-1.31254		CLIC3	9	139889059	139891024	0.200526	0.431945	0	0.848485	0.151515	NA	-0.378899	-1.22288	-0.843982
PPWD1	5	64859062	64883376	+	0.109837	0.54693	0.484848	0.515152	0	0.430295	-0.0173264	NA	0.447622		ZFP37	9	115804094	115819071	0.201941	0.434385	0	0.848485	0.151515	NA	1.76267	0.551334	-1.21134
LARP7	4	113558119	113578748	+	0.110147	0.54693	0.424242	0.575758	0	0.412555	-0.0474104	NA	0.459965		SH3GL2	9	17578951	17797127	0.20246	0.434829	0	0.787879	0.212121	NA	3.64101	2.85762	-0.783388
GLUD1	10	88809958	88853844	-	0.110185	0.54693	0.212121	0.787879	0	-0.958071	0.375255	NA	-1.33333		TAB3	X	30845558	30907511	0.202979	0.434829	0	0.666667	0.333333	NA	-0.031171	1.0478	1.07897
TAF7	5	140698056	140700351	-	0.11028	0.54693	0.454545	0.545455	0	0.698411	0.458278	NA	0.240132		TMSB15B	X	103217199	103220563	0.203123	0.434829	0	0.666667	0.333333	NA	0.632275	0.220802	-0.411473
THTPA	14	23980968	24028790	+	0.110313	0.54693	0.363636	0.636364	0	1.45984	0.856044	NA	0.603796		SIGLEC15	18	43405544	43422521	0.203278	0.434829	0	0.363636	0.636364	NA	-2.93106	-1.71994	1.21111
ADCY1	7	45614124	45762715	+	0.111002	0.54693	0.242424	0.757576	0	3.54567	2.01612	NA	1.52955		ZXDB	X	57618268	57623910	0.203584	0.434878	0	0.666667	0.333333	NA	0.552357	0.324914	-0.227443
GRB10	7	50657759	50772998	-	0.111007	0.54693	0.212121	0.787879	0	0.37501	1.21659	NA	-0.841576		MBD1	18	47793251	47808144	0.203998	0.435014	0	0.363636	0.636364	NA	0.329296	-0.159129	-0.488424
FAM149B1	10	74927876	75001939	+	0.111187	0.54693	0.242424	0.757576	0	0.341842	0.0313434	NA	0.310499		UPRT	X	74493893	74524732	0.204328	0.435014	0	0.666667	0.333333	NA	0.330627	0.0117556	-0.318872
PHF20	20	34359922	34538288	+	0.111227	0.54693	0.545455	0.454545	0	0.452135	0.131113	NA	0.321021		FBXO15	18	71740587	71814999	0.204513	0.435014	0.030303	0.333333	0.636364	5.50137	2.69907	2.05237	-0.880219
CAMK2D	4	114372187	114683083	-	0.111235	0.54693	0.424242	0.575758	0	0.499811	1.10901	NA	-0.609196		KLHL4	X	86772714	86924596	0.204779	0.435014	0	0.636364	0.363636	NA	-1.22127	-2.07838	-0.857118
DEPDC1B	5	59892738	59995993	-	0.111408	0.54693	0.424242	0.575758	0	-1.74041	-3.11033	NA	1.36992		NACC2	9	138898382	138987131	0.205794	0.43645	0	0.848485	0.151515	NA	-1.05262	-1.73316	-0.680543
PCDHA8	5	140220906	140391929	+	0.111477	0.54693	0.454545	0.545455	0	1.85815	3.51315	NA	-1.65499		CCDC120	X	48910960	48927510	0.206384	0.43645	0	0.636364	0.363636	NA	-0.453059	-0.0805619	0.372497
MGME1	20	17949533	17971765	+	0.111551	0.54693	0.515152	0.484848	0	-0.487743	-0.909243	NA	0.4215		RPL10	X	153626405	153630680	0.206523	0.43645	0	0.666667	0.333333	NA	-0.511476	-1.29016	-0.778683
HEXB	5	73935847	74017113	+	0.112083	0.54693	0.454545	0.545455	0	-0.203215	-0.477458	NA	0.274243		CDK9	9	130548304	130553052	0.20659	0.43645	0	0.848485	0.151515	NA	0.139658	-0.19273	-0.332389
AHSA1	14	77924219	77935815	+	0.112095	0.54693	0.363636	0.636364	0	0.92117	0.582445	NA	0.338725		PTBP3	9	114979994	115095306	0.206956	0.436624	0	0.848485	0.151515	NA	-0.266144	-0.748234	-0.48209
UBE2D2	5	138940750	139008019	+	0.112155	0.54693	0.424242	0.575758	0	-0.960148	0.810309	NA	-1.77046		GRP	18	56887399	56898006	0.209865	0.441633	0	0.363636	0.636364	NA	-0.523979	-1.61178	-1.0878
ACTR3C	7	149944300	150000069	-	0.112168	0.54693	0.272727	0.727273	0	0.53645	0.119581	NA	0.416869		LPPR1	9	103791030	104087417	0.209905	0.441633	0	0.848485	0.151515	NA	5.23656	4.43414	-0.802412
CEP128	14	80962820	81405884	-	0.11231	0.54693	0.363636	0.636364	0	0.0959694	-0.431536	NA	0.527505		SPG20	13	36875774	36920646	0.210905	0.443132	0.030303	0.757576	0.212121	1.2275	-0.652517	0.139102	0.71931
ZNF217	20	52183609	52199636	-	0.112432	0.54693	0.636364	0.363636	0	-0.173687	-0.576111	NA	0.402425		GEMIN8	X	14024844	14048035	0.211574	0.44393	0	0.636364	0.363636	NA	0.414403	0.215091	-0.199312
HIPK2	7	139246315	139477693	-	0.11264	0.54693	0.30303	0.69697	0	3.82384	3.09312	NA	0.730719		LCP1	13	46700057	46756459	0.212208	0.444442	0.030303	0.787879	0.181818	-0.597902	-0.848637	-1.09593	-0.256582
CTSA	20	44518782	44527459	+	0.112759	0.54693	0.515152	0.484848	0	-0.0971042	0.566947	NA	-0.664051		CREB3	9	35732316	35737005	0.212737	0.444442	0	0.818182	0.181818	NA	0.946383	0.538264	-0.408119
MSR1	8	15965386	16050300	-	0.112815	0.54693	0.151515	0.848485	0	0.195394	-0.838909	NA	1.0343		PSMD10	X	107327434	107334874	0.213082	0.444442	0	0.666667	0.333333	NA	0.697708	0.473056	-0.224652
PCDHB7	5	140552201	140555957	+	0.113677	0.550365	0.454545	0.545455	0	-0.585095	0.3018	NA	-0.886895		HSFX1	X	148855725	148858517	0.213215	0.444442	0	0.666667	0.333333	NA	0.588716	0.13734	-0.451375
PCDHGA12	5	140810157	140812789	+	0.113852	0.550464	0.454545	0.545455	0	-0.57197	0.265802	NA	-0.837772		HUWE1	X	53559056	53713674	0.213303	0.444442	0.0606061	0.606061	0.333333	0.437952	0.368508	0.158089	-0.216732
GATA3	10	8096666	8117164	+	0.114041	0.550631	0.242424	0.757576	0	-2.61936	-1.75757	NA	-0.861783		HMGB1	13	31032052	31191734	0.213552	0.444442	0.030303	0.787879	0.181818	0.653784	0.525368	-0.56131	-1.09143
PGBD3	10	50723150	50732327	-	0.114209	0.550698	0.242424	0.757576	0	1.06433	0.581798	NA	0.482537		FOXO4	X	70315998	70323384	0.21409	0.444487	0	0.666667	0.333333	NA	-0.0260864	-0.312687	-0.2866
ESF1	20	13694968	13765532	-	0.114497	0.551346	0.545455	0.454545	0	0.278757	-0.247982	NA	0.526739		NAIF1	9	130823511	130829599	0.214151	0.444487	0	0.848485	0.151515	NA	0.22212	-0.0988653	-0.320985
RUFY3	4	71570653	71655614	+	0.114986	0.551529	0.393939	0.606061	0	1.45567	0.958802	NA	0.496868		TYMS	18	657603	673499	0.215058	0.445671	0	0.363636	0.636364	NA	-0.446916	-1.0262	-0.579283
EMB	5	49692030	49737234	-	0.115038	0.551529	0.333333	0.666667	0	-4.05188	-2.70876	NA	-1.34312		KCNRG	13	50589389	50595058	0.215301	0.445671	0.0606061	0.69697	0.242424	-0.635182	-0.051125	-0.718728	-0.620878
SERPINA5	14	95047705	95059457	+	0.115068	0.551529	0.363636	0.636364	0	4.14081	2.84978	NA	1.29103		ST6GALNAC4	9	130670164	130679305	0.215853	0.446212	0	0.848485	0.151515	NA	0.556427	-0.467303	-1.02373
FGA	4	155504277	155511918	-	0.115153	0.551529	0.424242	0.575758	0	5.16336	8.0531	NA	-2.88975		EPB41L3	18	5392274	5544338	0.216631	0.44722	0	0.363636	0.636364	NA	-2.05889	-1.37214	0.686747
SORCS2	4	7194373	7744564	+	0.115776	0.55263	0.454545	0.545455	0	4.19728	3.02779	NA	1.16949		RBM10	X	47004616	47046214	0.216958	0.447295	0	0.636364	0.363636	NA	0.60926	0.942772	0.333512
AHCY	20	32868070	32899608	-	0.115838	0.55263	0.515152	0.454545	0.030303	0.199206	-0.491544	-1.01146	0.723245		CXorf21	X	30576940	30596033	0.217494	0.447798	0	0.666667	0.333333	NA	-1.49633	-2.03736	-0.541029
CXCL9	4	76922494	76928676	-	0.115847	0.55263	0.424242	0.575758	0	-1.3556	-0.287368	NA	-1.06824		TPGS2	18	34359986	34409179	0.218555	0.448977	0	0.363636	0.636364	NA	0.374254	-0.620833	-0.995086
PON3	7	94989183	95025687	-	0.116062	0.552918	0.242424	0.757576	0	3.36756	1.79855	NA	1.569		ZSCAN30	18	32831021	32870209	0.218909	0.448977	0	0.363636	0.636364	NA	0.643589	0.127967	-0.515622
ANKRD37	4	186317839	186321399	+	0.116398	0.553781	0.454545	0.545455	0	0.612396	0.0462671	NA	0.566129		EIF1AX	X	20142635	20159966	0.218942	0.448977	0	0.636364	0.363636	NA	-0.00246208	-0.223729	-0.221267
ZNF334	20	45128268	45142198	-	0.116686	0.554412	0.515152	0.484848	0	2.71489	1.84571	NA	0.869187		CRB2	9	126118445	126141034	0.219954	0.450451	0	0.848485	0.151515	NA	2.04969	0.112526	-1.93716
GNPDA1	5	141380233	141392620	-	0.116841	0.554415	0.454545	0.545455	0	0.469083	-0.0903312	NA	0.559414		C1QTNF9B	13	24465237	24471145	0.222177	0.453677	0.0909091	0.727273	0.181818	-0.318735	-0.196226	0.540377	0.750215
UBE2C	20	44441214	44445596	+	0.117068	0.554514	0.515152	0.484848	0	-0.570599	-1.71416	NA	1.14356		PLP2	X	49028183	49031469	0.222439	0.453677	0	0.636364	0.363636	NA	0.0560855	0.26657	0.210485
UNC5B	10	72972291	73062635	+	0.117173	0.554514	0.212121	0.787879	0	-0.673739	0.0267427	NA	-0.700482		TRMT10B	9	37753799	37778969	0.222559	0.453677	0	0.848485	0.151515	NA	0.234807	-0.471969	-0.706776
PLCB4	20	9049700	9461463	+	0.118348	0.559334	0.515152	0.484848	0	-0.261369	0.537671	NA	-0.79904		WDR44	X	117480035	117583924	0.222781	0.453677	0	0.666667	0.333333	NA	0.123156	-0.088216	-0.211372
ATAD1	10	89511268	89577988	-	0.118548	0.559541	0.212121	0.787879	0	1.24947	0.405135	NA	0.844331		CUL4A	13	113862506	113919392	0.223047	0.453677	0.0909091	0.727273	0.181818	0.0231517	0.537427	1.0691	0.588819
POP7	7	100303675	100305123	+	0.118945	0.56007	0.242424	0.757576	0	1.05575	-0.0869262	NA	1.14268		SKA1	18	47901391	47920538	0.223299	0.453677	0	0.363636	0.636364	NA	0.342576	-0.543065	-0.885641
NDUFS4	5	52856462	52979171	+	0.119059	0.56007	0.454545	0.545455	0	-0.105488	-0.388041	NA	0.282554		ADCYAP1	18	904943	912173	0.223999	0.454498	0	0.363636	0.636364	NA	-0.119818	-1.26283	-1.14302
ADRA2A	10	112836789	112840665	+	0.119169	0.56007	0.212121	0.787879	0	-2.7102	-1.75166	NA	-0.958533		SUSD1	9	114803060	114937577	0.224758	0.455066	0	0.848485	0.151515	NA	0.281587	-0.349803	-0.631389
CPXM1	20	2774714	2781292	-	0.119545	0.56007	0.515152	0.484848	0	-0.436676	-1.5809	NA	1.14423		FBXW5	9	139834884	139839206	0.22487	0.455066	0	0.848485	0.151515	NA	-0.795619	-1.4365	-0.640882
DPYSL4	10	134000413	134019280	+	0.11956	0.56007	0.242424	0.757576	0	1.29587	-0.580252	NA	1.87612		DTNA	18	32073253	32409292	0.225326	0.45539	0	0.363636	0.636364	NA	-1.03981	-2.00116	-0.961355
DOK7	4	3465032	3496209	+	0.119642	0.56007	0.424242	0.575758	0	1.36526	2.7724	NA	-1.40714		NRARP	9	140194082	140196703	0.227859	0.459904	0	0.848485	0.151515	NA	-1.46833	-2.24369	-0.775362
SOGA1	20	35405844	35488276	-	0.120033	0.56007	0.545455	0.454545	0	1.32532	0.514638	NA	0.810678		ARMCX2	X	100910266	100914876	0.22959	0.462228	0	0.666667	0.333333	NA	1.94755	0.828063	-1.11949
MED6	14	71049937	71067407	-	0.120081	0.56007	0.363636	0.636364	0	0.0500464	0.61842	NA	-0.568373		ARRDC1	9	140500091	140509812	0.229611	0.462228	0	0.848485	0.151515	NA	-0.395343	-1.0737	-0.678359
CTAGE4	7	143880547	143883173	+	0.120107	0.56007	0.272727	0.727273	0	-2.74673	-1.44718	NA	-1.29955		PLXNB3	X	153029650	153044801	0.230633	0.463629	0	0.666667	0.333333	NA	-2.59364	-1.08323	1.51042
TMEM144	4	159131400	159176439	+	0.120417	0.56007	0.424242	0.575758	0	-3.87009	-2.46284	NA	-1.40725		LDOC1	X	140269929	140271399	0.23091	0.463629	0	0.666667	0.333333	NA	3.30366	2.85151	-0.45215
CIPC	14	77564577	77583630	+	0.120589	0.56007	0.363636	0.636364	0	-1.90574	-0.157089	NA	-1.74865		UPF3A	13	115047058	115071292	0.231309	0.463823	0.0909091	0.727273	0.181818	0.488693	0.119991	-0.613039	-0.773997
ZNF474	5	121465207	121489266	+	0.120596	0.56007	0.454545	0.545455	0	-1.32865	-0.232384	NA	-1.09627		TEK	9	27109138	27230176	0.231694	0.463947	0	0.818182	0.181818	NA	0.203165	-0.791495	-0.99466
DSTN	20	17550598	17588652	+	0.120698	0.56007	0.515152	0.484848	0	-0.863828	-0.123671	NA	-0.740157		FGF14	13	102373204	102963036	0.231974	0.463947	0.030303	0.787879	0.181818	4.96417	2.67642	4.17125	1.4101
CTTNBP2	7	117350704	117513561	-	0.120886	0.560216	0.272727	0.727273	0	0.389261	1.9916	NA	-1.60234		TRMT2B	X	100264333	100307105	0.233372	0.465561	0	0.666667	0.333333	NA	-0.032534	-0.299479	-0.266945
TAX1BP1	7	27778991	27869386	+	0.121076	0.560367	0.272727	0.727273	0	0.375011	0.00315843	NA	0.371853		ELK1	X	47494918	47510003	0.233386	0.465561	0	0.636364	0.363636	NA	0.494061	0.27564	-0.218421
PRAP1	10	135160843	135166187	+	0.121426	0.560824	0.242424	0.757576	0	-6.03695	-3.52983	NA	-2.50712		TGFBR1	9	101867370	101916474	0.233814	0.465811	0	0.848485	0.151515	NA	0.201279	-0.482231	-0.68351
DCUN1D4	4	52709165	52783003	+	0.121609	0.560824	0.30303	0.69697	0	-0.112571	-0.733992	NA	0.621421		SNX12	X	70279096	70288298	0.23452	0.466612	0	0.666667	0.333333	NA	0.968986	0.182716	-0.78627
AASDH	4	57204449	57253674	-	0.121645	0.560824	0.424242	0.575758	0	0.515778	0.21649	NA	0.299288		ARHGEF6	X	135747708	135849551	0.235077	0.467117	0	0.666667	0.333333	NA	-1.35471	-1.82257	-0.467863
ZFAND4	10	46110948	46168180	-	0.122297	0.561574	0.181818	0.818182	0	1.23598	0.92356	NA	0.312417		BRCC3	X	154299694	154351349	0.235959	0.468025	0	0.666667	0.333333	NA	-0.510085	-1.09104	-0.58095
TRIM52	5	180682146	180688119	-	0.12242	0.561574	0.454545	0.545455	0	-0.153897	0.267421	NA	-0.421318		GLIPR2	9	36136532	36163910	0.236353	0.468025	0	0.818182	0.181818	NA	-0.750268	-1.8243	-1.07403
POM121	7	72349905	72421979	+	0.122532	0.561574	0.242424	0.757576	0	0.43118	0.744943	NA	-0.313763		CHIC1	X	72782983	72906937	0.236509	0.468025	0	0.666667	0.333333	NA	0.53066	0.0359745	-0.494686
SMARCAD1	4	95128758	95212443	+	0.122952	0.561574	0.424242	0.575758	0	0.661739	0.246545	NA	0.415194		WBP5	X	102611372	102613397	0.236751	0.468025	0	0.666667	0.333333	NA	0.282552	-0.930847	-1.2134
PTMS	12	6875482	6880118	+	0.12297	0.561574	0.151515	0.848485	0	1.71163	0.862537	NA	0.849092		PTAR1	9	72324437	72374876	0.237373	0.468652	0	0.818182	0.181818	NA	-0.161014	-0.733356	-0.572343
MBIP	14	36767763	36789882	-	0.123017	0.561574	0.424242	0.575758	0	-0.343148	0.126932	NA	-0.47008		LONRF3	X	118108576	118152318	0.237871	0.469031	0	0.666667	0.333333	NA	0.180512	-0.313216	-0.493729
FAM200A	7	99143922	99149757	-	0.123321	0.561574	0.212121	0.787879	0	1.35634	0.808029	NA	0.548312		ZNF674	X	46357159	46404892	0.238175	0.469031	0	0.636364	0.363636	NA	-0.159755	0.320709	0.480464
NFS1	20	34256609	34287287	-	0.123553	0.561574	0.545455	0.454545	0	0.697099	-0.106906	NA	0.804005		HDX	X	83572881	83757487	0.24149	0.474951	0	0.666667	0.333333	NA	1.13694	0.59833	-0.538611
SEC61A2	10	12171639	12207403	+	0.123634	0.561574	0.181818	0.818182	0	1.63582	0.875509	NA	0.76031		PTPN3	9	112137973	112213664	0.2421	0.475543	0	0.848485	0.151515	NA	0.482088	-0.131669	-0.613756
NUDT6	4	123813798	123843761	-	0.123784	0.561574	0.424242	0.575758	0	0.815657	0.313705	NA	0.501952		HCCS	X	11129405	11141206	0.2442	0.479055	0	0.636364	0.363636	NA	0.447366	-0.014968	-0.462334
EIF4EBP2	10	72163860	72188374	+	0.123996	0.561574	0.212121	0.787879	0	-1.79499	-1.34615	NA	-0.448837		MCTS1	X	119737743	119755014	0.244555	0.47914	0	0.666667	0.333333	NA	0.0853174	-0.119572	-0.20489
RBL1	20	35624751	35724618	-	0.124067	0.561574	0.545455	0.454545	0	-0.178473	-0.513892	NA	0.335419		RASA3	13	114747193	114843454	0.247624	0.484254	0.0909091	0.727273	0.181818	1.25077	1.08839	0.736556	-0.369875
PJA2	5	108670409	108745675	-	0.124338	0.561574	0.454545	0.545455	0	0.63417	0.252696	NA	0.381474		LCN12	9	139846767	139849949	0.247977	0.484254	0	0.848485	0.151515	NA	2.615	1.77333	-0.841667
C1QL3	10	16555741	16564004	-	0.12437	0.561574	0.212121	0.787879	0	-2.91421	-1.84531	NA	-1.0689		RPL39	X	118920466	118925622	0.248217	0.484254	0	0.666667	0.333333	NA	-0.468028	-0.784803	-0.316775
SKP2	5	36152144	36184143	+	0.124477	0.561574	0.424242	0.575758	0	-0.311581	-1.09588	NA	0.784296		RRAGB	X	55744109	55785207	0.248424	0.484254	0	0.666667	0.333333	NA	1.00671	0.663517	-0.343189
TMEM130	7	98444110	98467673	-	0.124661	0.561574	0.242424	0.757576	0	-0.920462	1.07936	NA	-1.99982		ATRX	X	76760355	77041755	0.248884	0.484537	0	0.666667	0.333333	NA	0.572643	0.190153	-0.382491
TMEM236	10	17794259	17842866	+	0.1248	0.561574	0.212121	0.787879	0	-6.59186	-4.00729	NA	-2.58456		DIRAS2	9	93372113	93405387	0.249268	0.48467	0	0.818182	0.181818	NA	-1.98732	-3.57521	-1.58789
ZNF277	7	111846642	111983989	+	0.125042	0.561574	0.272727	0.727273	0	-0.0616268	-0.438218	NA	0.376592		DZIP1	13	96230455	96296960	0.250454	0.485733	0.030303	0.787879	0.181818	-0.0046847	-1.28878	-0.609093	0.632128
PRDX3	10	120927210	120938377	-	0.125068	0.561574	0.212121	0.787879	0	-0.829018	0.214943	NA	-1.04396		C18orf21	18	33552587	33559250	0.250906	0.485733	0	0.363636	0.636364	NA	-0.216499	-0.538576	-0.322076
HSPA4	5	132387661	132440709	+	0.125071	0.561574	0.424242	0.575758	0	1.35032	1.06256	NA	0.287762		C5	9	123714612	123812554	0.25106	0.485733	0	0.848485	0.151515	NA	0.125477	1.15406	1.02858
CPEB2	4	15004297	15071777	+	0.125109	0.561574	0.454545	0.545455	0	-0.640716	-0.960007	NA	0.319292		RAB41	X	69502021	69504852	0.251078	0.485733	0	0.666667	0.333333	NA	0.857138	0.0748037	-0.782335
PRKD1	14	30045684	30396899	-	0.12552	0.562713	0.393939	0.606061	0	1.18697	0.499857	NA	0.687113		EXOSC8	13	37574677	37583751	0.252902	0.488648	0.030303	0.757576	0.212121	0.0385275	0.112117	-0.254552	-0.363838
TEP1	14	20833825	20881579	-	0.125835	0.562759	0.363636	0.636364	0	-1.34746	-0.884955	NA	-0.462506		OLFM1	9	137967088	138013030	0.253879	0.48992	0	0.848485	0.151515	NA	-1.62292	-2.80002	-1.1771
MACC1	7	20174277	20257013	-	0.125846	0.562759	0.272727	0.727273	0	-4.18938	-2.08835	NA	-2.10104		GSN	9	124030379	124095120	0.25509	0.49161	0	0.848485	0.151515	NA	-1.77626	-2.58148	-0.80522
SH3PXD2A	10	105353783	105615164	-	0.126002	0.562759	0.212121	0.787879	0	3.23925	0.616015	NA	2.62324		GJB2	13	20761601	20767114	0.255768	0.49161	0.0606061	0.757576	0.181818	-5.21114	-1.61518	-3.68928	-1.80773
APC	5	112043201	112181936	+	0.126222	0.563028	0.393939	0.606061	0	0.069871	-0.478383	NA	0.548254		TUBB6	18	12307667	12326615	0.255995	0.49161	0	0.363636	0.636364	NA	-1.04231	-1.81575	-0.773444
SNW1	14	78183941	78227497	-	0.126626	0.563028	0.363636	0.636364	0	0.549525	0.272387	NA	0.277138		ALAD	9	116148591	116163400	0.256034	0.49161	0	0.848485	0.151515	NA	0.34924	1.4793	1.13006
STOX1	10	70587293	70652816	+	0.126653	0.563028	0.212121	0.757576	0.030303	2.1407	1.39851	1.01889	0.756799		SHROOM4	X	50334641	50557044	0.256971	0.492794	0.0909091	0.545455	0.363636	-0.942385	-0.517917	-1.71059	-1.13203
MXI1	10	111967362	112047123	+	0.126693	0.563028	0.212121	0.787879	0	-0.348815	-0.806258	NA	0.457443		ZNF519	18	14075988	14132489	0.25765	0.493481	0	0.363636	0.636364	NA	-0.767303	-1.27419	-0.506886
ZNF827	4	146678778	146860112	-	0.126892	0.563211	0.424242	0.575758	0	0.581311	0.278388	NA	0.302923		ASTN2	9	119187503	120177317	0.257986	0.49351	0	0.818182	0.181818	NA	1.52865	2.00805	0.479398
TSPAN14	10	82214037	82282391	+	0.127134	0.563587	0.212121	0.787879	0	-0.476539	0.837512	NA	-1.31405		NLGN3	X	70364680	70391051	0.258657	0.493828	0	0.666667	0.333333	NA	0.343248	-0.286162	-0.62941
THAP5	7	108202587	108209897	-	0.127499	0.564504	0.272727	0.727273	0	1.10906	0.632154	NA	0.476908		NCS1	9	132934856	132999583	0.258794	0.493828	0	0.848485	0.151515	NA	-0.697961	-1.66379	-0.965831
LIFR	5	38475064	38556748	-	0.127718	0.564773	0.454545	0.545455	0	-0.493566	0.215386	NA	-0.708953		KDM6A	X	44732420	44971857	0.259721	0.494983	0	0.636364	0.363636	NA	0.00110268	-0.282591	-0.283693
GLRX5	14	96001322	96011055	+	0.128318	0.566028	0.393939	0.606061	0	0.247759	1.09086	NA	-0.843099		GALNT12	9	101569980	101612363	0.26227	0.499221	0	0.848485	0.151515	NA	-0.179755	-1.11935	-0.939597
CCDC125	5	68576518	68628543	-	0.128319	0.566028	0.424242	0.575758	0	0.398342	-0.014461	NA	0.412803		ATP8A2	13	25946148	26599989	0.264356	0.502221	0.0606061	0.757576	0.181818	3.6279	3.35574	1.10288	-2.27301
NEIL2	8	11627171	11644854	+	0.128805	0.566814	0.181818	0.818182	0	1.04228	0.471794	NA	0.570488		SMC2	9	106856540	106903700	0.264499	0.502221	0	0.848485	0.151515	NA	-0.635615	-1.31063	-0.675016
CALCR	7	93053798	93189122	-	0.128814	0.566814	0.242424	0.757576	0	2.86044	5.20373	NA	-2.34328		STOML2	9	35099772	35103192	0.265903	0.504186	0	0.818182	0.181818	NA	-0.438377	-0.0754524	0.362925
FAM188A	10	15820167	15902532	-	0.129168	0.567381	0.212121	0.787879	0	0.609786	-0.0613198	NA	0.671106		FXN	9	71650478	71715094	0.266372	0.504186	0	0.818182	0.181818	NA	0.503771	0.0099068	-0.493864
GALC	14	88399357	88459615	-	0.129279	0.567381	0.363636	0.636364	0	0.211795	-0.518166	NA	0.729961		PHF11	13	50069745	50103128	0.266517	0.504186	0.0606061	0.69697	0.242424	-0.192632	-0.763381	-1.21528	-0.497561
HAUS4	14	23415436	23426351	-	0.129483	0.567381	0.363636	0.636364	0	-0.590727	0.0273582	NA	-0.618085		KBTBD3	11	105921824	105948465	0.26743	0.505292	0	0.848485	0.151515	NA	0.392274	-0.0256546	-0.417929
PHYHIPL	10	60936347	61007534	+	0.129578	0.567381	0.212121	0.787879	0	-3.56963	-1.95454	NA	-1.61509		MEDAG	13	31480311	31499709	0.268443	0.506584	0.030303	0.787879	0.181818	-2.07777	-3.26668	-2.24923	0.973417
ACTA2	10	90694830	90712580	-	0.129849	0.567872	0.212121	0.787879	0	0.10925	-0.949443	NA	1.05869		PLIN2	9	19115758	19127604	0.268858	0.506745	0	0.818182	0.181818	NA	-1.94318	-0.997635	0.945541
PPIF	10	81107219	81115090	+	0.130141	0.568386	0.212121	0.787879	0	-1.82867	0.466657	NA	-2.29532		SPINK4	9	33240161	33248565	0.269574	0.507472	0	0.818182	0.181818	NA	-3.83402	-5.80772	-1.97369
C5orf63	5	126378249	126409184	-	0.130317	0.568386	0.454545	0.545455	0	0.633271	0.0448431	NA	0.588428		SPIN4	X	62567106	62571218	0.270537	0.508662	0.121212	0.545455	0.333333	0.635943	0.522014	-0.219107	-0.761836
METTL14	4	119606524	119633425	+	0.130521	0.568386	0.424242	0.575758	0	1.48839	1.03539	NA	0.453007		PRUNE2	9	79226291	79307331	0.270982	0.508877	0	0.818182	0.181818	NA	0.353663	-0.623712	-0.977376
VDAC3	8	42249278	42263455	+	0.130618	0.568386	0.151515	0.848485	0	0.941003	-0.379631	NA	1.32063		MUSK	9	113431050	113563278	0.271616	0.509445	0	0.848485	0.151515	NA	-2.04941	-3.448	-1.39859
ZNF346	5	176449680	176494983	+	0.130784	0.568386	0.424242	0.575758	0	0.917595	1.4726	NA	-0.555008		NDUFB11	X	47001614	47004609	0.272236	0.509987	0	0.636364	0.363636	NA	0.590903	0.274659	-0.316243
WDR19	4	39184023	39287430	+	0.130921	0.568386	0.484848	0.515152	0	1.71736	1.07219	NA	0.645166		MRPS31	13	41303431	41345347	0.272756	0.5102	0.030303	0.757576	0.212121	0.117241	-0.0986159	-0.404127	-0.313813
GNB2	7	100271362	100276792	+	0.131284	0.568886	0.242424	0.757576	0	1.00634	0.711769	NA	0.294575		STAG2	X	123094409	123236506	0.273057	0.5102	0	0.666667	0.333333	NA	0.260569	-0.169584	-0.430153
BTNL3	5	180415844	180433727	+	0.131487	0.568886	0.454545	0.545455	0	-7.34365	-5.11252	NA	-2.23113		NAPG	18	10525872	10552766	0.273345	0.5102	0	0.363636	0.636364	NA	0.220663	-0.398213	-0.618876
EYA2	20	45523262	45817492	+	0.13157	0.568886	0.545455	0.454545	0	2.74456	1.29765	NA	1.44691		RIBC1	X	53449804	53456776	0.275829	0.514212	0.0606061	0.606061	0.333333	2.13066	1.21397	0.662477	-0.634832
SUB1	5	32585604	32604185	+	0.131756	0.568886	0.424242	0.575758	0	-0.942605	-0.0365954	NA	-0.906009		KATNAL2	18	44526786	44628614	0.277578	0.516846	0	0.363636	0.636364	NA	0.510793	0.155273	-0.35552
FAM86B1	8	12039612	12051624	-	0.131833	0.568886	0.181818	0.818182	0	1.54712	0.986548	NA	0.56057		PGAM4	X	77223457	77225135	0.281195	0.522559	0	0.666667	0.333333	NA	0.0564518	1.04022	0.983772
SDCBP2	20	1290552	1294317	-	0.133005	0.572768	0.454545	0.545455	0	-1.2738	-0.0830906	NA	-1.1907		FRMD3	9	85857904	86153348	0.281325	0.522559	0	0.818182	0.181818	NA	-1.83943	-2.87442	-1.035
ABCC2	10	101542354	101611949	+	0.133053	0.572768	0.212121	0.787879	0	-4.03958	-2.38834	NA	-1.65124		HS6ST2	X	131760037	132095423	0.283689	0.526245	0	0.666667	0.333333	NA	-0.729642	-1.89404	-1.16439
LIMCH1	4	41361623	41702061	+	0.133368	0.572882	0.424242	0.575758	0	-0.112659	0.409657	NA	-0.522316		OGN	9	95145552	95166981	0.283994	0.526245	0	0.818182	0.181818	NA	-1.45358	-2.34233	-0.888753
RFC1	4	39289068	39368001	-	0.133519	0.572882	0.484848	0.515152	0	0.877946	0.597115	NA	0.280831		C9orf163	9	139377946	139380519	0.284683	0.526886	0	0.848485	0.151515	NA	2.70055	1.1893	-1.51125
TFPI2	7	93514708	93520303	-	0.13356	0.572882	0.242424	0.757576	0	0.315321	1.49933	NA	-1.18401		LRCH2	X	114345178	114468635	0.285587	0.527283	0	0.666667	0.333333	NA	1.23715	0.658344	-0.578809
ZNF33A	10	38299577	38348995	+	0.134077	0.574407	0.212121	0.757576	0.030303	0.995643	0.36424	-0.399158	0.660765		LURAP1L	9	12775011	12823059	0.285885	0.527283	0	0.818182	0.181818	NA	-0.868817	-1.53105	-0.662231
PLRG1	4	155456148	155471585	-	0.134421	0.575194	0.424242	0.575758	0	0.359172	0.024178	NA	0.334994		ECM2	9	95255828	95298374	0.285926	0.527283	0	0.818182	0.181818	NA	-1.43134	-0.93276	0.498581
FASTK	7	150773707	150777970	-	0.134993	0.576263	0.272727	0.727273	0	0.825846	0.0765516	NA	0.749294		SUSD3	9	95820969	95847420	0.286583	0.527861	0	0.818182	0.181818	NA	-0.720761	-1.5134	-0.792642
TRIM7	5	180620923	180627930	-	0.13537	0.576263	0.454545	0.545455	0	3.25024	2.44581	NA	0.804437		RPS6KA6	X	83313353	83442943	0.287798	0.528902	0	0.666667	0.333333	NA	1.46192	0.90877	-0.553154
PTPRA	20	2844840	3019315	+	0.135422	0.576263	0.515152	0.484848	0	1.26188	0.901494	NA	0.360388		MYO5B	18	47349155	47721451	0.287835	0.528902	0	0.363636	0.636364	NA	-0.81184	-1.68045	-0.868608
BRAT1	7	2577443	2595392	-	0.135674	0.576263	0.272727	0.727273	0	1.0105	0.642169	NA	0.368333		ARHGAP28	18	6834431	6915715	0.288522	0.529531	0	0.363636	0.636364	NA	-2.01828	-1.11487	0.903404
FAM160B1	10	116581502	116659586	+	0.136029	0.576263	0.212121	0.787879	0	-0.369045	-0.600675	NA	0.23163		SRPX	X	38008587	38080177	0.289141	0.530035	0	0.636364	0.363636	NA	-1.2989	-1.95596	-0.657067
PCDHGB7	5	140797213	140799996	+	0.136043	0.576263	0.454545	0.545455	0	-0.229369	0.33584	NA	-0.565209		AGPAT2	9	139567594	139581911	0.29019	0.531324	0	0.848485	0.151515	NA	-1.10283	-2.32553	-1.2227
NAF1	4	164047859	164088073	-	0.136265	0.576263	0.424242	0.575758	0	1.05419	0.639651	NA	0.414538		HSDL2	9	115142188	115234685	0.29203	0.534058	0	0.848485	0.151515	NA	-0.697967	-1.65717	-0.959203
NHLRC2	10	115614390	115672265	+	0.13627	0.576263	0.212121	0.787879	0	0.588651	-0.123242	NA	0.711893		MORF4L2	X	102930425	102941746	0.292542	0.534251	0	0.666667	0.333333	NA	0.229761	0.568281	0.33852
TRIP13	5	892968	918164	+	0.136348	0.576263	0.484848	0.515152	0	-0.503589	-1.28611	NA	0.782519		NUDT11	X	51232862	51239459	0.293066	0.534251	0.030303	0.606061	0.363636	1.57379	-0.140227	-1.41266	-1.35406
ARHGEF5	7	144052488	144077725	+	0.136493	0.576263	0.272727	0.727273	0	-2.64696	-0.812977	NA	-1.83398		SRPK3	X	153046455	153051187	0.293289	0.534251	0	0.666667	0.333333	NA	-0.349694	-1.17871	-0.829013
PPP1R3C	10	93388197	93392858	-	0.136544	0.576263	0.212121	0.787879	0	2.53315	1.14809	NA	1.38506		FGF13	X	137713733	137793827	0.293525	0.534251	0	0.666667	0.333333	NA	1.68581	1.07563	-0.610182
PAPSS1	4	108534821	108641419	-	0.136784	0.576263	0.393939	0.606061	0	1.5697	1.14143	NA	0.428273		USP11	X	47092313	47107727	0.294442	0.535286	0	0.636364	0.363636	NA	2.33085	1.93116	-0.39969
TAF3	10	7860466	8057016	+	0.136946	0.576263	0.242424	0.757576	0	0.344331	0.140249	NA	0.204082		EFHC2	X	44007127	44202923	0.295451	0.536486	0	0.636364	0.363636	NA	-2.22809	-2.94626	-0.718168
PNLIPRP2	10	118380464	118404654	+	0.137093	0.576263	0.212121	0.787879	0	-5.27625	-3.38524	NA	-1.89101		GPR18	13	99906966	99910682	0.295909	0.536684	0.030303	0.787879	0.181818	-2.05428	-2.20744	-2.86691	-0.66514
TTC37	5	94799598	94890709	-	0.137139	0.576263	0.454545	0.545455	0	0.711747	0.354421	NA	0.357325		CDK16	X	47077527	47089396	0.29698	0.537993	0	0.636364	0.363636	NA	-0.378876	0.0538744	0.432751
ARAP2	4	36067619	36245979	-	0.137252	0.576263	0.484848	0.515152	0	-1.87226	-2.62786	NA	0.7556		TMEM2	9	74298281	74383800	0.29964	0.542054	0	0.818182	0.181818	NA	-0.0655234	-0.559767	-0.494244
ZNF354A	5	178138521	178157703	-	0.137421	0.576298	0.424242	0.575758	0	-0.436063	-0.0410699	NA	-0.394993		FRY	13	32605436	32870776	0.300679	0.542054	0.030303	0.787879	0.181818	2.25766	1.08659	1.44412	0.31415
GPR85	7	112720467	112726393	-	0.137685	0.576728	0.272727	0.727273	0	2.99386	1.45054	NA	1.54333		OLFM4	13	53602875	53626196	0.300996	0.542054	0.030303	0.757576	0.212121	-10.2067	-5.02611	-8.11445	-2.88909
IFRD1	7	112063198	112117258	+	0.138044	0.577155	0.272727	0.727273	0	-1.0054	-0.464233	NA	-0.541167		CELF4	18	34823002	35146000	0.301388	0.542054	0	0.363636	0.636364	NA	3.05776	2.49779	-0.559971
POLR2J	7	102113546	102119381	-	0.13811	0.577155	0.242424	0.757576	0	0.877685	-0.0416024	NA	0.919287		RBM3	X	48432740	48439553	0.301418	0.542054	0	0.636364	0.363636	NA	-0.606473	0.0982627	0.704735
DYNC1H1	14	102430864	102517135	+	0.138636	0.578677	0.393939	0.606061	0	0.621748	0.372775	NA	0.248973		FAM189A2	9	71939487	72007389	0.301553	0.542054	0	0.818182	0.181818	NA	-1.89506	-3.26982	-1.37476
PPM1A	14	60712469	60765805	+	0.138879	0.578934	0.393939	0.606061	0	-0.431032	0.74516	NA	-1.17619		GPC6	13	93879060	95060274	0.30169	0.542054	0.030303	0.787879	0.181818	-0.154871	-0.975263	0.0403489	0.985227
IFI27L2	14	94594117	94595957	-	0.139196	0.578934	0.363636	0.636364	0	1.95075	1.46954	NA	0.481212		ATP8B1	18	55313657	55470327	0.30257	0.543003	0	0.363636	0.636364	NA	-0.419213	-0.989161	-0.569948
SLA2	20	35240921	35274619	-	0.139258	0.578934	0.545455	0.454545	0	-2.3067	-1.26659	NA	-1.0401		CUL4B	X	119658443	119694817	0.30294	0.543033	0	0.666667	0.333333	NA	0.842894	0.62449	-0.218404
COX15	10	101454549	101492423	-	0.139352	0.578934	0.212121	0.787879	0	0.481026	0.129829	NA	0.351197		TMOD1	9	100263461	100364025	0.303927	0.544167	0	0.848485	0.151515	NA	-1.1129	-2.31682	-1.20392
SP4	7	21467651	21554440	+	0.139508	0.578934	0.272727	0.727273	0	1.80026	1.18722	NA	0.613045		UBA1	X	47050198	47074527	0.306195	0.547591	0	0.636364	0.363636	NA	0.394083	0.534381	0.140298
CYP2C9	10	96698414	96749148	+	0.139671	0.578937	0.212121	0.787879	0	-2.60873	-0.582913	NA	-2.02582		EDF1	9	139756565	139760788	0.308991	0.551949	0	0.848485	0.151515	NA	-0.375722	-0.799945	-0.424223
ACOX3	4	8368008	8442452	-	0.140069	0.57951	0.454545	0.545455	0	-0.51179	-0.711614	NA	0.199824		RFX3	9	3218296	3526001	0.31024	0.553019	0	0.818182	0.181818	NA	1.56267	0.956546	-0.606127
URGCP	7	43915492	43946668	-	0.140133	0.57951	0.242424	0.757576	0	2.60834	-0.872699	NA	3.48104		VMA21	X	150565656	150577836	0.311045	0.553019	0	0.666667	0.333333	NA	-0.0038381	0.373134	0.376972
APMAP	20	24943579	24973425	-	0.140736	0.581327	0.515152	0.484848	0	1.68624	1.06369	NA	0.622554		MVB12B	9	129089122	129159912	0.311201	0.553019	0	0.848485	0.151515	NA	-0.113028	-1.91911	-1.80608
H2AFY	5	134670070	134734928	-	0.140923	0.581431	0.393939	0.606061	0	0.905019	0.21668	NA	0.688339		HSPA5	9	127997126	128003666	0.311623	0.553019	0	0.848485	0.151515	NA	0.435501	0.0857708	-0.34973
AS3MT	10	104629209	104661656	+	0.141175	0.581799	0.181818	0.818182	0	2.35843	0.897044	NA	1.46139		ARAF	X	47420498	47425374	0.31205	0.553019	0	0.636364	0.363636	NA	0.650479	0.856771	0.206292
UBR7	14	93673400	93695561	+	0.141367	0.581919	0.363636	0.636364	0	0.829755	0.623205	NA	0.20655		PBDC1	X	75392763	75398145	0.312092	0.553019	0	0.666667	0.333333	NA	-0.570297	-0.904699	-0.334402
PANK3	5	167982627	168006614	-	0.141953	0.583658	0.424242	0.575758	0	-0.938445	-1.592	NA	0.653552		PGK1	X	77359665	77382324	0.31239	0.553019	0	0.666667	0.333333	NA	-0.0694629	-0.299491	-0.230028
NUDT9	4	88343727	88380606	+	0.14237	0.584698	0.454545	0.545455	0	-0.0656509	-0.390759	NA	0.325108		MTMR1	X	149861836	149904172	0.312665	0.553019	0	0.666667	0.333333	NA	0.121639	0.432904	0.311265
ID1	20	30193085	30194318	+	0.14265	0.585176	0.484848	0.515152	0	-1.31018	-1.87339	NA	0.563207		C9orf64	9	86553225	86571657	0.313019	0.553019	0	0.818182	0.181818	NA	-0.37977	-0.941628	-0.561858
YAE1D1	7	39605974	39612480	+	0.14285	0.585324	0.242424	0.757576	0	0.732932	-0.149877	NA	0.882809		CSTF2	X	100075347	100095924	0.313544	0.553019	0	0.666667	0.333333	NA	-0.558812	-0.362676	0.196136
CYSTM1	5	139554652	139623374	+	0.143177	0.585994	0.424242	0.575758	0	1.69636	1.11298	NA	0.583375		TLR7	X	12885201	12908480	0.313545	0.553019	0	0.636364	0.363636	NA	-2.06336	-1.46169	0.601676
CDCA4	14	105475909	105487425	-	0.143937	0.586708	0.393939	0.606061	0	0.127176	-0.127802	NA	0.254978		USP14	18	158482	213739	0.314227	0.553586	0	0.363636	0.636364	NA	0.119664	-0.282327	-0.401991
SAV1	14	51100297	51135071	-	0.144033	0.586708	0.393939	0.606061	0	0.527776	0.161996	NA	0.36578		DSC2	18	28645939	28682395	0.315858	0.553956	0	0.363636	0.636364	NA	-1.88594	-2.57532	-0.689378
GPR137C	14	53019865	53104431	+	0.14413	0.586708	0.393939	0.606061	0	1.58639	0.447397	NA	1.139		L1CAM	X	153126968	153141399	0.315937	0.553956	0	0.666667	0.333333	NA	-1.04471	-1.81409	-0.769375
ARHGAP19	10	98981929	99030447	-	0.144134	0.586708	0.212121	0.787879	0	0.607871	0.168276	NA	0.439595		ITGBL1	13	102104943	102368796	0.316755	0.553956	0.030303	0.787879	0.181818	2.89073	2.90424	3.69296	0.789225
UPK3BL	7	102277471	102283238	-	0.144375	0.586708	0.242424	0.727273	0.030303	2.9582	0.502263	2.84039	2.36241		PTPN2	18	12785476	12884334	0.316874	0.553956	0	0.363636	0.636364	NA	-0.0744903	-0.502489	-0.427998
TRAM1L1	4	118004709	118006736	-	0.144738	0.586708	0.424242	0.575758	0	3.41523	2.46057	NA	0.954656		GPR34	X	41548225	41556530	0.316931	0.553956	0	0.666667	0.333333	NA	-1.39431	-0.854004	0.540308
KAT6B	10	76586170	76792380	+	0.144844	0.586708	0.212121	0.787879	0	0.160946	0.793624	NA	-0.632678		ENTPD2	9	139942549	139948503	0.317032	0.553956	0	0.848485	0.151515	NA	1.07336	0.425844	-0.647511
TMEM140	7	134832765	134850967	+	0.144853	0.586708	0.272727	0.727273	0	0.704046	0.194549	NA	0.509497		SEC61B	9	101984569	101992901	0.317181	0.553956	0	0.848485	0.151515	NA	0.259876	-0.144439	-0.404315
C20orf24	20	35234136	35240960	+	0.145057	0.586708	0.545455	0.454545	0	0.663845	-0.425768	NA	1.08961		EPSTI1	13	43460523	43566448	0.317732	0.553956	0.030303	0.757576	0.212121	-2.33906	-2.16254	-3.11031	-0.940976
ZNF512B	20	62588056	62601223	-	0.145207	0.586708	0.575758	0.424242	0	0.874668	0.522102	NA	0.352566		RAB39B	X	154487518	154493874	0.317833	0.553956	0	0.69697	0.30303	NA	4.0898	3.4938	-0.595997
LTBR	12	6484533	6500737	+	0.14525	0.586708	0.151515	0.848485	0	0.465858	0.061548	NA	0.40431		SYTL5	X	37865834	37988073	0.318039	0.553956	0	0.636364	0.363636	NA	-1.16785	-0.612765	0.555082
COX7C	5	85913783	85916583	+	0.145322	0.586708	0.454545	0.545455	0	-0.36263	-0.631767	NA	0.269137		PDZD4	X	153067620	153095351	0.318894	0.554818	0	0.666667	0.333333	NA	2.47727	1.6893	-0.787972
ACTR10	14	58666832	58702354	+	0.145564	0.586866	0.393939	0.606061	0	0.65587	0.459115	NA	0.196755		PCSK5	9	78505559	78810805	0.319375	0.555027	0	0.818182	0.181818	NA	-3.46041	-4.37925	-0.918841
WDFY4	10	49893517	50191001	+	0.14569	0.586866	0.242424	0.757576	0	-1.98318	-1.16329	NA	-0.819895		TIMM8A	X	100600643	100603957	0.320761	0.556806	0	0.666667	0.333333	NA	-0.20301	0.189402	0.392412
CDKN2AIPNL	5	133737755	133747598	-	0.14598	0.587347	0.424242	0.575758	0	1.17115	0.891817	NA	0.279337		AQP3	9	33441151	33447631	0.325921	0.565126	0	0.818182	0.181818	NA	-0.361826	0.70577	1.0676
RHNO1	12	2985423	2998691	+	0.146138	0.587347	0.151515	0.848485	0	0.0443541	1.25846	NA	-1.21411		MID2	X	107069083	107174867	0.326332	0.5652	0	0.666667	0.333333	NA	0.801105	0.430693	-0.370413
MLH3	14	75480466	75518235	-	0.146436	0.587883	0.363636	0.636364	0	0.470941	0.136597	NA	0.334344		PLS3	X	114795176	114885181	0.327111	0.565913	0	0.666667	0.333333	NA	1.32747	0.95528	-0.372191
GOLGA7B	10	99609994	99631335	+	0.146636	0.587969	0.181818	0.818182	0	-0.00200881	0.843217	NA	-0.845225		MAPRE2	18	32556891	32723434	0.328657	0.567949	0	0.363636	0.636364	NA	0.49588	0.0695017	-0.426378
ZNFX1	20	47862436	47894756	-	0.146786	0.587969	0.545455	0.454545	0	0.120805	0.530474	NA	-0.409669		CDC16	13	115000319	115038198	0.330099	0.569801	0.0909091	0.727273	0.181818	0.308172	0.197351	-0.0612054	-0.27087
ADAMTS6	5	64444562	64777747	-	0.147835	0.589242	0.484848	0.515152	0	0.800956	1.7078	NA	-0.90684		ZMYM2	13	20532809	20665984	0.33098	0.570681	0.0606061	0.757576	0.181818	1.04636	0.27676	0.0780559	-0.255711
UCKL1	20	62571181	62582527	-	0.147853	0.589242	0.575758	0.424242	0	0.684735	0.380077	NA	0.304658		GALR1	18	74962007	74982098	0.331621	0.571146	0.030303	0.333333	0.636364	2.25684	0.907582	0.0411829	-0.978837
RIMKLB	12	8834272	8935694	+	0.147912	0.589242	0.151515	0.848485	0	-0.729824	-0.0854351	NA	-0.644389		PTPRM	18	7567313	8406859	0.332302	0.571679	0	0.363636	0.636364	NA	1.00254	0.267365	-0.735176
FAM198B	4	159045731	159093718	-	0.148013	0.589242	0.424242	0.575758	0	-1.1552	-0.294691	NA	-0.860506		URM1	9	131133597	131154295	0.333849	0.573698	0	0.848485	0.151515	NA	-0.576561	-2.42597	-1.84941
PPAPDC1A	10	122216465	122349367	+	0.148031	0.589242	0.212121	0.787879	0	1.79644	0.511726	NA	1.28472		SASH3	X	128913891	128929177	0.334262	0.573767	0	0.636364	0.363636	NA	-1.89321	-1.396	0.497216
PLAC8L1	5	145463875	145483946	-	0.148434	0.589242	0.393939	0.606061	0	-1.43033	-0.798749	NA	-0.631577		MSANTD4	11	105878646	105893014	0.335389	0.574813	0	0.848485	0.151515	NA	0.650544	0.353367	-0.297176
FAM220A	7	6369039	6388590	-	0.148631	0.589242	0.272727	0.727273	0	1.04403	0.663168	NA	0.380861		TBC1D4	13	75858799	76056304	0.335668	0.574813	0.030303	0.787879	0.181818	1.81659	0.440492	0.131532	-0.359926
ORAI2	7	102073976	102097268	+	0.148826	0.589242	0.242424	0.757576	0	1.9826	0.556355	NA	1.42624		NDFIP2	13	80055258	80130212	0.335993	0.574813	0.030303	0.787879	0.181818	-1.36333	-0.872433	-1.56882	-0.678202
MRPL52	14	23299091	23304246	+	0.148881	0.589242	0.363636	0.636364	0	1.16417	0.334042	NA	0.830128		RASEF	9	85594499	85678043	0.339413	0.580019	0	0.818182	0.181818	NA	-3.33089	-4.47803	-1.14715
ADIPOR2	12	1800246	1897845	+	0.149063	0.589242	0.151515	0.848485	0	-0.11491	-0.48593	NA	0.37102		COL4A6	X	107398836	107681660	0.340823	0.581778	0	0.666667	0.333333	NA	-2.90056	-3.63823	-0.737677
MRPS33	7	140705960	140714479	-	0.149171	0.589242	0.30303	0.69697	0	0.856591	-0.563788	NA	1.42038		ARX	X	25021810	25034065	0.341442	0.581778	0	0.666667	0.333333	NA	-1.07642	-1.61571	-0.539295
MFHAS1	8	8641998	8751131	-	0.149213	0.589242	0.181818	0.818182	0	0.0517344	-0.608147	NA	0.659882		RALBP1	18	9475529	9538106	0.34165	0.581778	0	0.363636	0.636364	NA	0.0979692	-0.212536	-0.310506
HEPACAM2	7	92817851	92848908	-	0.149248	0.589242	0.242424	0.757576	0	-1.21742	0.824337	NA	-2.04176		TNFSF15	9	117546914	117554810	0.341955	0.581778	0	0.818182	0.181818	NA	-3.04701	-3.72752	-0.680519
ADRA1D	20	4201277	4229659	-	0.149848	0.589691	0.515152	0.484848	0	-0.963831	-1.88268	NA	0.918851		EMILIN2	18	2847027	2914090	0.343373	0.583544	0	0.363636	0.636364	NA	-1.42353	-1.83049	-0.406965
NOP2	12	6666035	6677498	-	0.150006	0.589691	0.151515	0.848485	0	1.0118	0.597149	NA	0.414655		PNPLA7	9	140354403	140445021	0.345032	0.585411	0	0.848485	0.151515	NA	1.43097	0.874786	-0.556182
FAM110A	20	814339	826922	+	0.150079	0.589691	0.454545	0.545455	0	-0.268861	-0.93252	NA	0.663659		GNL3L	X	54556643	54593720	0.345631	0.585411	0	0.636364	0.363636	NA	0.446066	0.245852	-0.200214
PSD2	5	139175405	139224048	+	0.150229	0.589691	0.424242	0.575758	0	2.6986	1.71269	NA	0.985904		GSPT2	X	51486480	51489328	0.34579	0.585411	0.030303	0.606061	0.363636	2.17621	-0.695692	-1.22663	-0.667692
F12	5	176829138	176836577	-	0.150394	0.589691	0.424242	0.575758	0	1.98061	0.910189	NA	1.07042		KCND1	X	48818638	48828251	0.346275	0.585411	0	0.636364	0.363636	NA	0.993167	0.615693	-0.377474
ZSCAN25	7	99214570	99230030	+	0.150718	0.589691	0.212121	0.787879	0	0.621896	0.294435	NA	0.327461		CDADC1	13	49822046	49867622	0.346758	0.585411	0.0606061	0.69697	0.242424	-0.469309	-0.17544	-0.438624	-0.239675
GPRIN3	4	90165428	90229161	-	0.151154	0.589691	0.424242	0.575758	0	1.38943	0.71773	NA	0.671703		GAREM	18	29704839	30050447	0.346934	0.585411	0	0.363636	0.636364	NA	-0.921778	-1.19666	-0.274882
EXOC3L4	14	103566480	103576896	+	0.151177	0.589691	0.393939	0.606061	0	-2.16055	-1.22969	NA	-0.930867		CHMP1B	18	11851388	11854448	0.347136	0.585411	0	0.363636	0.636364	NA	-0.424368	-0.73399	-0.309622
TIMM23B	10	51371378	51734610	+	0.15118	0.589691	0.242424	0.757576	0	0.6219	-0.0414855	NA	0.663385		ARHGAP6	X	11155662	11683821	0.348367	0.586844	0	0.636364	0.363636	NA	0.472539	-0.101035	-0.573574
ENAM	4	71494460	71512536	+	0.151221	0.589691	0.393939	0.606061	0	2.18773	3.58686	NA	-1.39913		CDH2	18	25530926	25616549	0.352341	0.592889	0	0.363636	0.636364	NA	-0.259617	-1.00958	-0.749965
LAMB4	7	107663995	107770801	-	0.151233	0.589691	0.272727	0.727273	0	0.317273	-1.04237	NA	1.35964		PDZD11	X	69506210	69509798	0.352838	0.593076	0	0.666667	0.333333	NA	0.172213	-0.238821	-0.411034
ST8SIA4	5	100142638	100238989	-	0.151344	0.589691	0.454545	0.545455	0	-1.80096	-1.14489	NA	-0.65607		LIPG	18	47088400	47119278	0.353733	0.593932	0	0.363636	0.636364	NA	0.568562	0.0251264	-0.543435
ZC3H14	14	89029252	89079853	+	0.151578	0.589691	0.363636	0.636364	0	0.840205	0.555593	NA	0.284612		PPP2R4	9	131873596	131911225	0.355582	0.596385	0	0.848485	0.151515	NA	1.24137	0.555472	-0.685896
SMAD1	4	146402950	146480328	+	0.151826	0.589691	0.424242	0.575758	0	0.0440423	-0.215534	NA	0.259577		PRKX	X	3522383	3631675	0.356201	0.596773	0	0.666667	0.333333	NA	-2.05354	-1.58288	0.470667
SNAI2	8	49830235	49833999	-	0.151844	0.589691	0.151515	0.848485	0	0.214335	-0.592292	NA	0.806627		FSD1L	9	108210314	108314714	0.359194	0.601133	0	0.848485	0.151515	NA	2.09677	0.910978	-1.18579
IFIT2	10	91061705	91069033	+	0.152003	0.589691	0.212121	0.787879	0	-1.30639	-0.684185	NA	-0.622202		NHS	X	17393542	17754114	0.362876	0.605669	0	0.636364	0.363636	NA	0.607427	0.135832	-0.471595
IFIT1B	10	91137812	91144962	+	0.152379	0.589981	0.212121	0.787879	0	0.745319	0.0129425	NA	0.732377		ZFAND5	9	74966340	74979508	0.363198	0.605669	0	0.818182	0.181818	NA	0.580542	0.257294	-0.323248
CROT	7	86974950	86989425	+	0.152408	0.589981	0.242424	0.757576	0	-1.1275	-0.332835	NA	-0.79467		GK	X	30671475	30749579	0.363704	0.605669	0	0.666667	0.333333	NA	-2.40375	-2.91596	-0.512211
NCOA6	20	33302577	33370207	-	0.152901	0.59125	0.515152	0.454545	0.030303	0.734703	0.222179	0.853039	0.473095		MOB3B	9	27325206	27529850	0.364119	0.605669	0	0.818182	0.181818	NA	-2.23325	-2.86914	-0.63589
PIK3R1	5	67511583	67597649	+	0.153206	0.591787	0.393939	0.606061	0	-0.0882912	-0.694816	NA	0.606525		DSG2	18	29077966	29128971	0.364215	0.605669	0	0.363636	0.636364	NA	-0.648853	-1.1958	-0.546943
ERI1	8	8860313	8890849	+	0.153718	0.593125	0.181818	0.818182	0	-0.0577976	-0.626302	NA	0.568504		PIK3C3	18	39535162	39661448	0.364268	0.605669	0	0.363636	0.636364	NA	-0.155368	-0.573271	-0.417903
RIPK3	14	24805226	24809242	-	0.154323	0.594817	0.363636	0.636364	0	-0.730928	0.463317	NA	-1.19425		NAP1L2	X	72432134	72434710	0.364735	0.605791	0	0.727273	0.272727	NA	3.38436	2.92715	-0.457214
C1R	12	7187512	7245043	-	0.154556	0.595074	0.151515	0.848485	0	0.893307	-0.62516	NA	1.51847		GNG10	9	114423850	114432526	0.365131	0.605794	0	0.848485	0.151515	NA	0.668014	-0.675831	-1.34385
ZNF107	7	64126460	64148208	+	0.154955	0.595298	0.242424	0.757576	0	1.08054	-0.38058	NA	1.46112		PNCK	X	152935187	152938743	0.365773	0.606206	0	0.666667	0.333333	NA	-1.94539	-2.96259	-1.0172
ZSCAN21	7	99647416	99662663	+	0.155093	0.595298	0.212121	0.787879	0	0.993425	0.600623	NA	0.392802		FLNA	X	153576899	153603006	0.366421	0.606627	0	0.666667	0.333333	NA	-1.89009	-2.72169	-0.831602
SH3BP2	4	2794749	2842823	+	0.155191	0.595298	0.424242	0.575758	0	-0.632993	0.17621	NA	-0.809202		MAGEE1	X	75648045	75651746	0.368867	0.610019	0	0.757576	0.242424	NA	2.23693	1.94337	-0.293565
ZNF133	20	18268926	18297640	+	0.155564	0.595298	0.545455	0.454545	0	0.839401	0.550927	NA	0.288474		MRO	18	48321489	48346434	0.369566	0.610448	0	0.363636	0.636364	NA	-1.572	-0.672834	0.899161
GID8	20	61569440	61579827	+	0.155918	0.595298	0.575758	0.424242	0	0.784657	0.606499	NA	0.178158		TCEAL4	X	102831158	102842664	0.370718	0.610448	0	0.666667	0.333333	NA	1.92698	3.22925	1.30227
ARFGEF1	8	68109883	68255912	-	0.155936	0.595298	0.151515	0.848485	0	0.412376	-0.0690918	NA	0.481467		THSD1	13	52951301	52980629	0.370749	0.610448	0.030303	0.727273	0.242424	-0.348536	-0.647192	0.00512302	0.640369
HMMR	5	162887516	162918951	+	0.156044	0.595298	0.454545	0.545455	0	-0.489662	-1.48944	NA	0.999783		FCN1	9	137795081	137809849	0.37088	0.610448	0	0.848485	0.151515	NA	-0.608967	-0.108345	0.500622
POT1	7	124462439	124570037	-	0.156114	0.595298	0.272727	0.727273	0	1.48027	1.00451	NA	0.475757		ABCA1	9	107543282	107690527	0.371111	0.610448	0	0.848485	0.151515	NA	0.523942	0.921438	0.397497
OXA1L	14	23235730	23240998	+	0.156253	0.595298	0.363636	0.636364	0	0.23575	-0.0994583	NA	0.335208		NXNL2	9	91150015	91159462	0.3732	0.613229	0	0.818182	0.181818	NA	0.372178	-0.195047	-0.567226
PLAU	10	75670858	75677259	+	0.156414	0.595298	0.212121	0.787879	0	-1.95735	-1.27229	NA	-0.68506		EDNRB	13	78469615	78549858	0.374216	0.614241	0.030303	0.787879	0.181818	-1.46607	-0.373557	-0.880757	-0.466737
C7orf73	7	135347220	135361160	+	0.156477	0.595298	0.272727	0.727273	0	0.593064	0.273865	NA	0.319199		MURC	9	103340360	103350671	0.378506	0.620301	0	0.848485	0.151515	NA	-0.369677	0.793898	1.16357
LARP1B	4	128982420	129132298	+	0.156614	0.595298	0.393939	0.606061	0	0.680965	0.364457	NA	0.316508		ONECUT2	18	55102916	55158530	0.378714	0.620301	0	0.363636	0.636364	NA	2.54538	1.58719	-0.958186
EML5	14	89081173	89259096	-	0.156792	0.595344	0.363636	0.636364	0	2.21234	1.73195	NA	0.480388		BCL2	18	60790578	60986613	0.379447	0.62084	0	0.363636	0.636364	NA	-1.6164	-1.94777	-0.331366
C7orf50	7	1036621	1068068	-	0.157067	0.595479	0.272727	0.727273	0	0.0528167	1.0161	NA	-0.963283		SH3BGRL	X	80457302	80554046	0.383991	0.625155	0	0.69697	0.30303	NA	0.252478	-0.0379616	-0.29044
CNNM2	10	104678074	104838344	+	0.157161	0.595479	0.181818	0.818182	0	0.575993	0.254984	NA	0.321009		TSPAN6	X	99882104	99891729	0.384019	0.625155	0	0.666667	0.333333	NA	-2.03622	-1.50339	0.532824
HELLS	10	96305523	96361856	+	0.157722	0.59568	0.212121	0.787879	0	0.459099	-0.422296	NA	0.881395		PNMA3	X	152224765	152228827	0.384412	0.625155	0	0.666667	0.333333	NA	-0.39987	-1.07986	-0.679992
SH2D4A	8	19171080	19253729	+	0.157755	0.59568	0.151515	0.848485	0	0.184716	-0.700807	NA	0.885523		CTAGE1	18	19993563	19997878	0.384797	0.625155	0	0.363636	0.636364	NA	0.590504	0.0688653	-0.521639
AGAP8	10	51224680	51371321	-	0.157967	0.59568	0.242424	0.757576	0	-0.202597	-0.819506	NA	0.616909		FAM69C	18	72102962	72124503	0.384867	0.625155	0.030303	0.333333	0.636364	-1.16277	-0.624503	-1.33188	-0.66252
ABCD4	14	74751979	74769767	-	0.158134	0.59568	0.363636	0.636364	0	-0.708273	-0.17571	NA	-0.532563		GPR64	X	19007424	19140755	0.385281	0.625155	0	0.606061	0.393939	NA	4.47889	4.97999	0.501101
RIN3	14	92980124	93155339	+	0.158254	0.59568	0.363636	0.636364	0	-1.86901	-1.3349	NA	-0.534104		FAM122A	9	71394921	71398795	0.385528	0.625155	0	0.818182	0.181818	NA	0.836413	0.499334	-0.337079
NRIP2	12	2934513	2944221	-	0.158432	0.59568	0.151515	0.848485	0	0.609063	0.120098	NA	0.488965		FAM166B	9	35561826	35563896	0.385674	0.625155	0	0.818182	0.181818	NA	3.46008	3.06654	-0.39354
CHD8	14	21853352	21899867	-	0.158687	0.59568	0.363636	0.636364	0	0.828542	0.595468	NA	0.233074		TMEM35	X	100333708	100351353	0.385742	0.625155	0	0.666667	0.333333	NA	-2.20806	-3.23593	-1.02787
PTGIS	20	48120410	48184707	-	0.158719	0.59568	0.545455	0.454545	0	-2.08639	-1.18742	NA	-0.898969		NAA16	13	41885340	41951166	0.387507	0.627178	0.030303	0.757576	0.212121	0.155427	-0.326377	-0.476312	-0.168466
TMED4	7	44617492	44621894	-	0.158849	0.59568	0.242424	0.757576	0	-0.0953249	-0.875159	NA	0.779834		LRRC19	9	26993133	27005691	0.387806	0.627178	0	0.818182	0.181818	NA	-4.7928	-6.37227	-1.57947
HSPA12B	20	3713316	3733752	+	0.158881	0.59568	0.515152	0.484848	0	-0.0624128	-0.744254	NA	0.681841		BAAT	9	104122698	104145801	0.388335	0.627374	0	0.848485	0.151515	NA	2.92153	4.99443	2.0729
C5orf38	5	2752244	2754490	+	0.159215	0.596306	0.484848	0.515152	0	-0.4497	0.12	NA	-0.569699		C18orf42	18	5145283	5197502	0.389775	0.628615	0	0.363636	0.636364	NA	1.24361	1.92929	0.685687
CASS4	20	54987167	55034396	+	0.160034	0.598143	0.606061	0.393939	0	-1.73515	-1.17238	NA	-0.562775		KLHL13	X	117031775	117107701	0.389921	0.628615	0	0.666667	0.333333	NA	-2.14124	-2.61182	-0.470582
FAM21A	10	51827647	51893269	+	0.160081	0.598143	0.242424	0.757576	0	0.390008	0.0553407	NA	0.334667		FOXP3	X	49106896	49121288	0.391167	0.62958	0	0.636364	0.363636	NA	0.638434	1.04838	0.409945
STRN3	14	31363004	31495607	-	0.160208	0.598143	0.393939	0.606061	0	0.624178	0.269353	NA	0.354825		CD274	9	5450502	5463238	0.391339	0.62958	0	0.818182	0.181818	NA	-0.608617	-0.860385	-0.251768
ADAM12	10	127700953	128077127	-	0.160609	0.598734	0.212121	0.757576	0.030303	3.7148	2.33058	-0.844612	1.50634		GATA6	18	19749397	19782491	0.392396	0.630622	0	0.393939	0.606061	NA	-0.568013	-0.0924873	0.475526
ENC1	5	73923230	73937249	-	0.160739	0.598734	0.454545	0.545455	0	0.713507	0.235226	NA	0.478281		RPL17	18	47014850	47018834	0.392829	0.630659	0	0.363636	0.636364	NA	-0.549162	-1.61923	-1.07007
COL23A1	5	177664616	178017556	-	0.161141	0.598734	0.424242	0.575758	0	-2.88455	-2.0009	NA	-0.883645		AVPR2	X	153167984	153172620	0.393864	0.631027	0	0.666667	0.333333	NA	-1.11028	-1.97841	-0.868127
ARHGEF28	5	72921982	73237818	+	0.161377	0.598734	0.454545	0.545455	0	0.408816	1.05528	NA	-0.646465		UAP1L1	9	139971952	139978990	0.393879	0.631027	0	0.848485	0.151515	NA	0.973834	0.553757	-0.420077
RPP38	10	15139178	15146256	+	0.161583	0.598734	0.212121	0.787879	0	0.634617	0.299898	NA	0.334719		MYL12A	18	3247479	3256235	0.395425	0.632844	0	0.363636	0.636364	NA	-0.83053	-1.22541	-0.394883
CDK7	5	68530621	68573257	+	0.161673	0.598734	0.424242	0.575758	0	0.0507682	-0.181561	NA	0.232329		TBC1D8B	X	106045918	106093063	0.396508	0.633897	0	0.666667	0.333333	NA	-0.432113	-0.741045	-0.308932
UBE2B	5	133706866	133727799	+	0.16168	0.598734	0.424242	0.575758	0	-0.0453279	-0.349245	NA	0.303917		BRINP1	9	121928907	122131739	0.396907	0.633897	0	0.848485	0.151515	NA	2.20053	1.71061	-0.489925
HKDC1	10	70980058	71027315	+	0.161707	0.598734	0.212121	0.787879	0	-6.63785	-4.03233	NA	-2.60552		C8G	9	139839697	139841426	0.397788	0.634645	0	0.848485	0.151515	NA	-1.47613	-0.268206	1.20793
IDI1	10	1085358	1094823	-	0.162205	0.598755	0.242424	0.757576	0	0.486858	0.172574	NA	0.314284		KPNA3	13	50273442	50367057	0.400103	0.637184	0.0606061	0.69697	0.242424	-0.745754	-0.37887	-0.638505	-0.230284
[truncated: 2,603 more rows]

## Sheet: Supp Table 3
Supplementary table S3: FISH TMA and patient information for pNETs.
[truncated: 62 more rows]

## Sheet: Supp Table 4
Supplementary table S4: FISH TMA and patient information for sbNETs.
[truncated: 74 more rows]

## Sheet: Supp Table 5
Supplementary Table S5: Percent average copy number loss, normal, and gain for fCNA biomarkers.
[truncated: 82 more rows]
[truncated: 16 more columns]

[truncated: 7 more sheets: Supp Table 6, Supp Table 7, Supp Table 8, Supp Table 9, Supp Table 10 , Supp Table 11, Supp Table 12]
