# Supplementary material for: Functional Copy Number Alterations as Diagnostic and Prognostic Biomarkers in Neuroendocrine Tumors
Source: Preprints.org preprint supplement (doi:10.20944/preprints202406.1211.v1), 2024-06-18
Supplement: Supplementary file 1 [file supplementary › Supp_Materials/NET_manuscript_supp_fig.pdf]

# Supp Figure S1: Primary vs metastatic pNET CMA Results

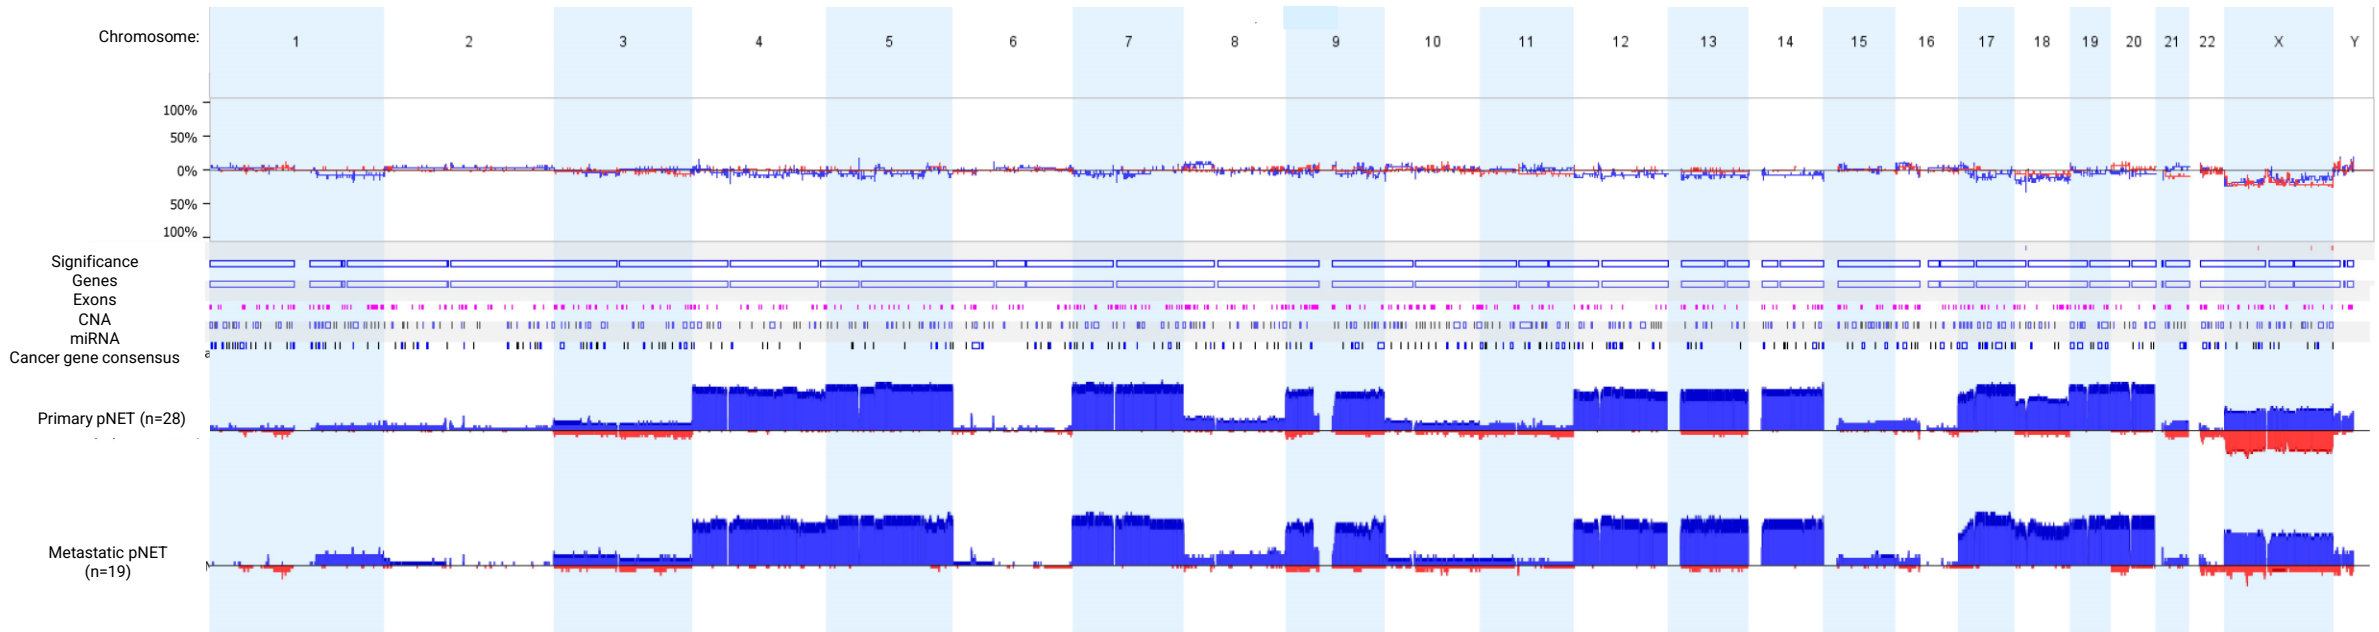

**Supplementary Figure S1:** Copy number alteration profiles of primary and metastatic pancreatic neuroendocrine tumors. Blue indicates copy number gain. Red indicates copy number loss. CMA = chromosomal microarray. miRNA = microRNA. CNA= copy number alteration. pNET= pancreatic neuroendocrine tumor. sbNET = small bowel neuroendocrine tumor.

# Supp Figure S2: Primary vs metastatic sbNET CMA Results

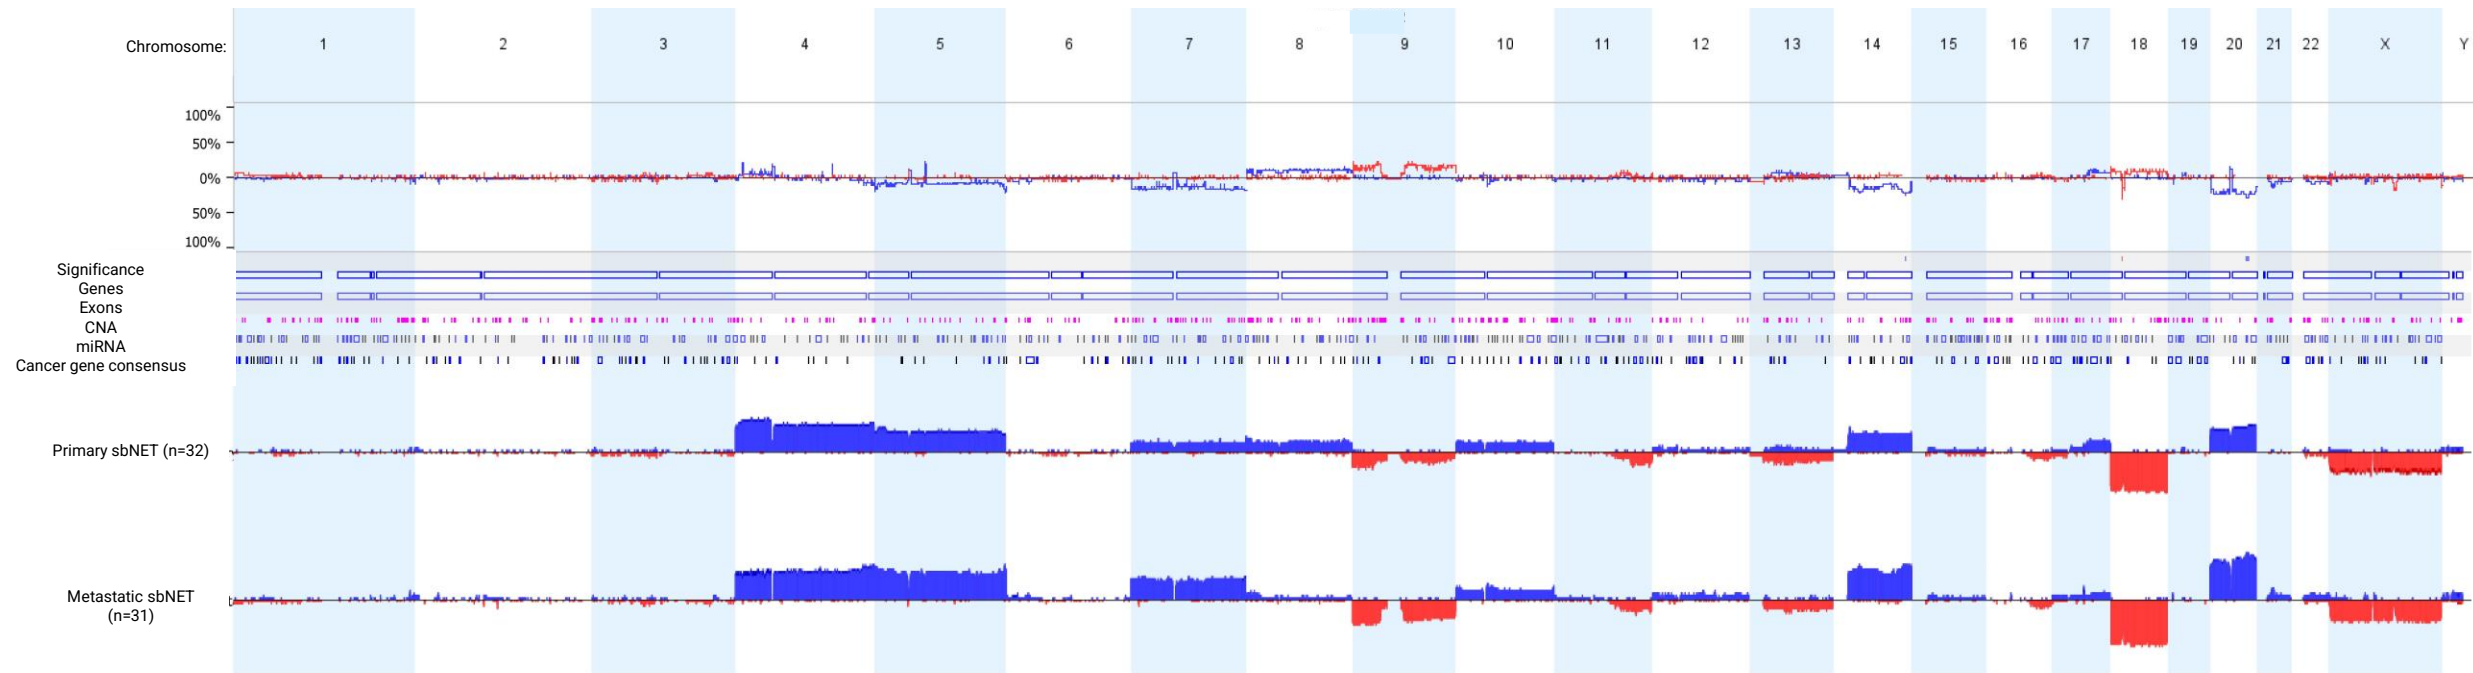

**Supplementary Figure S2:** Copy number alteration profiles of primary and metastatic small bowel neuroendocrine tumors. Blue indicates copy number gain. Red indicates copy number loss.  
miRNA = microRNA CNA= copy number alteration sbNET= small bowel neuroendocrine tumor
